# Supplementary material for: Computational network analysis of host genetic risk variants of severe COVID-19
Source: Hum Genomics. 2023 Mar 2;17:17. doi: 10.1186/s40246-023-00454-y (PMC9977643; doi:10.1186/s40246-023-00454-y)
Supplement: Supplementary file 2 — Additional file 2. List of the 109 genetic risk variants and 24 network mapping for severe COVID-19. [file 40246_2023_454_MOESM2_ESM.xlsx]

## Sheet: T1 List of filtered ge
Reference	Genetic risk variants are associated with the severity of COVID-19												Risk genes: associated genes with COVID-19 genetic risk variants			COVID-19 - and related diseases
PMID	Risk variant	Chrom.	Pos.	Variant structure	Functional Consequence	Variant type	Major allele	Minor allele	MAF	Relative Risk/Risk Ratio	P-Value	OR	Risk gene	Gene type	Biotype/ gene classification	Diseases (Publication, OMIM, ClinVar)
34545062, 32706371	rs200553089	X	12887891	SNV	missense variant	Common variant	G	T	N.A	N.A	N.A	N.A	TLR7	Transcript	protein coding	OMIM and ClinVar: IMMUNODEFICIENCY
34545062	rs2042915990	X	12887637	DEL	frameshiftvariant	Common variant	AACT	_	N.A	N.A	N.A	N.A	TLR7	Transcript	protein coding	OMIM and ClinVar: IMMUNODEFICIENCY
32558485	rs60220284	1	228932972	SNV	missense variant	Common variant	N.A	A	N.A	N.A	N.A	N.A	PEDS1-UBE2V1	Transcript	N.A	N.A
33604698	rs13168774	5	132404964	SNV	intergenic variant	Common variant	A	C	> 0.001	> 0.6	8.6e-25	2.13–2.64	ABO, CNN3, DLX3, SLC22A5, LZTFL1, SLC6A20	Transcript	Lung eQTL (Lung tissue)	Publication: Asthma, CDSP
33536081	rs3131294	6	32180146	SNV	intronic variant	Common variant	A	A	0.1	N.A	2.3e-08	1.5	NOTCH4	Transcript	protein coding	N.A
33307546	rs2236757	21	34624917	SNV	intronic variant	Common variant	A	G	0.71	N.A	4.99e-08	1.3	IFNAR2	Transcript	protein coding	N.A
34545062 , 33532652	rs6226	15	90881344	SNV	Synonymous variant	Common variant	G	C	0.68	N.A	1.3569e-09	1	FURIN	Transcript	protein coding	Publication: hypertension
33604698, 34537084, 34237774	rs13050728	21	33242905	SNV	intronic variant	Common variant	T	C	0.66	N.A	1e-16	0.8	IFNAR2	Transcript	nonsense mediated decay	N.A
33604698, 35922517	rs505922	9	133273813	SNV	intronic variant	Common variant	C	T	0.66	N.A	2e-22	0.9	ABO	Transcript	protein coding	Publication: VTE, Thyroid stimulating hormone measurement
34545062 , 33396837	rs7364083	21	41472130	SNV	intronic variant	Common variant	G	A	0.62	0.2269	0.3396	N.A	TMPRSS2	Transcript	protein coding	N.A
34545062 , 33396837	rs2070788	21	41470061	SNV	intronic variant	Common variant	G	A	0.59	0.1475	0.4522	N.A	TMPRSS2	Transcript	protein coding	Publication: influenza due to Influenza A virus subtype H7N9
34545062 , 33396837	rs9974589	21	41470196	SNV	intronic variant	Common variant	A	C	0.59	0.1217	0.3489	N.A	TMPRSS2	Transcript	protein coding	N.A
34545062, 32703421	rs469390	21	41446003	SNV	missense variant	Common variant	G	A	0.59	N.A	N.A	N.A	MX1	Transcript	protein coding	N.A
33298875	rs6020298	20	50152518	SNV	intronic variant	Common variant	G	A	0.58	N.A	4.1e-06	1.2	PEDS1-UBE2V1	Transcript	protein coding	N.A
34027315	rs677800	11	62498829	SNV	intronic variant	Common variant	T	G	0.03	N.A	N.A	N.A	AHNAK	Transcript	processed transcript	N.A
34545062, 32343152	rs8176740	9	133256085	SNV	missense variant	Common variant	A	T	0.54	N.A	N.A	N.A	ABO	Transcript	protein coding	ClinVar: Three Vessel Coronary Disease
34489862	rs4341	17	63488629	SNV	intronic variant	Common variant	G	C	0.49	N.A	N.A	N.A	ACE	Transcript	protein coding	Publication: Diabetes and hypertension, ClinVar: Renal tubular dysgenesis of genetic origin
34545062, 32703421	rs464397	21	41428591	SNV	intronic variant	Common variant	C	T	0.48	N.A	N.A	N.A	MX1	Transcript	protein coding	N.A
34545062 , 33532652	rs8039305	15	90879313	SNV	intronic variant	Common variant	T	C	0.47	N.A	1.7643e-38	1.1	FURIN	Transcript	protein coding	Publication: hypertension
34545062, 33968142	rs383510	21	41486440	SNV	intronic variant	Common variant	T	C	0.46	N.A	0.002	2	TMPRSS2	Transcript	protein coding	N.A
34489862, 35305693, 20066004	rs4343	17	63488670	SNV	Synonymous variant	Common variant	G	A	0.44	N.A	3e-25	2.1	ACE	Transcript	protein coding	Publication: Alzheimer's Disease, Serum albumin measurement, ClinVar: Myocardial infarction, Renal tubular dysgenesis of genetic origin
32747830	rs669	12	9079672	SNV	missense variant	Common variant	T	C	0.38	N.A	0.000654354	0.79	A2M	Transcript	protein coding	Publication: Alzheimer's Disease, OMIM and ClinVar: ALPHA-2-MACROGLOBULIN POLYMORPHISM
32747830	rs4883215	12	9161611	SNV	missense variant	Common variant	A	G	0.37	N.A	0.00045	0.78	A2M	Transcript	protein coding	Publication: Alzheimer's Disease
34429158 , 34315903	rs1405655	19	50379362	SNV	intronic variant	Common variant	T	C	0.37	N.A	N.A	1.1	NR1H2	Transcript	nonsense mediated decay	Publication: Diabetes Mellitus Non-Insulin-Dependent, Inflammatory Bowel Diseases, Tuberculosis
33396837	rs2074192	X	15564667	SNV	intronic variant	Common variant	C	T	0.37	0.6503	0.0526	N.A	ACE2	Transcript	nonsense mediated decay	Publication: Cardiovascular Diseases, Essential Hypertension
33396837, 32917283	rs2285666	X	15592225	SNV	Splice region	Common variant	C	T	0.37	0.0139	0.8243	N.A	ACE2	Transcript	protein coding	Publication: Diabetes Mellitus Non-Insulin-Dependent, Hypertensive disease, Dyslipidemias, Orthostatic hypertension
33396837	rs17854725	21	41473456	SNV	Synonymous variant	Common variant	G	A	0.37	0.0021	0.9316	N.A	TMPRSS2	Transcript	protein coding	N.A
33432184	rs75603675	21	41507982	SNV	missense variant	Common variant	C	A	0.36	N.A	N.A	N.A	TMPRSS2	Transcript	protein coding	N.A
34545062	rs8134378	21	41521831	SNV	regulatory region	Common variant	G	A	0.36	N.A	N.A	N.A	TMPRSS2	Regulatory	enhancer	N.A
32747830	rs12029080	1	94587797	SNV	intronic variant	Common variant	T	G	0.35	N.A	N.A	1.05	LOC105378861	Transcript	lncRNA	N.A
32562665 , 32558485, 34655949	rs657152	9	133263862	SNV	intronic variant	Common variant	A	A	0.35	N.A	4.95e-08	1.3	ABO	Transcript	protein coding	N.A
34429158 , 34315903, 35848942	rs8065800	17	45933112	SNV	intronic variant	Common variant	G	A	0.33	N.A	N.A	1.2	MAPT	Transcript	protein coding	N.A
33307546	rs2109069	19	4719443	SNV	intronic variant	Common variant	G	A	0.33	N.A	3.98e-12	1.4	DPP9	Transcript	miscRNA	Publication: idiopathic pulmonary fibrosis
33396837	rs2106809	X	15599938	SNV	intronic variant	Common variant	A	G	0.33	0.0511	0.6666	N.A	ACE2	Transcript	protein coding	Publication: Essential Hypertension
34027315 ,35255492	rs12610495	19	4717660	SNV	intronic variant	Common variant	A	G	0.31	N.A	4e-36	1.3	DPP9	Transcript	protein coding	Publication: Lung Diseases Interstitial
33307546	rs9380142	6	29798794	SNV	3’UTR variant	Common variant	A	G	0.29	N.A	1.8e-08	1.3	HLA-G	Transcript	nonsense mediated decay	N.A
34061844, 34308129	rs11723621	4	71749645	SNV	intronic variant	Common variant	A	G	0.29	N.A	5e-08	N.A	GC	Transcript	processed transcript	Publication: White Blood Cell Count procedure
34545062 , 33396837	rs734056	21	41480393	SNV	intronic variant	Common variant	C	A	0.29	0.0257	0.7615	N.A	TMPRSS2	Transcript	protein coding	N.A
34061844, 28757204	rs6127099	20	54114863	SNV	intergenic variant	Common variant	A	T	0.288	N.A	2e-17	N.A	CYP24A1	Transcript	protein coding	Publication: Glomerular Filtration Rate, Vitamin D3 measurement, Parathyroid hormone measurement
33604698, 33633408	rs4767027	12	112921352	SNV	intronic variant	Common variant	A	T	0.28	1	7e-08	0.5	OAS1	Transcript	miscRNA	Publication: Blood Protein Measurement, OMIM and ClinVar: OAS1 POLYMORPHISM
34655949, 33748697	rs3787946	21	41475808	SNV	intronic variant	Common variant	G	C	0.28	N.A	2.73 × 10−6	0.9	TMPRSS2	Transcript	protein coding	N.A
34545062 , 33396837	rs11702475	21	41485641	SNV	intronic variant	Common variant	C	T	0.27	0.007	0.8752	N.A	TMPRSS2	Transcript	nonsense mediated decay	N.A
34545062 , 33396837	rs34783969	21	41482711	SNV	intronic variant	Common variant	A	T	0.27	0.0066	0.8786	N.A	TMPRSS2	Transcript	protein coding	N.A
34545062 , 33396837	rs55964536	21	41473711	SNV	intronic variant	Common variant	C	T	0.26	0.0044	0.9004	N.A	TMPRSS2	Transcript	protein coding	N.A
34545062 , 33396837	rs4290734	21	41481156	SNV	intronic variant	Common variant	A	G	0.26	0.0002	0.9769	N.A	TMPRSS2	Transcript	protein coding	N.A
34655949 ,32867305,32451547 , 33396837, 33748697, 33298875	rs12329760	21	41480570	SNV	missense variant	Common variant	C	T	0.25	N.A	3.13e-06	0.9	TMPRSS2	Transcript	nonsense mediated decay	Publication: Prostate carcinoma
34655949, 33748697	rs2298661	21	41473715	SNV	missense variant	Common variant	C	A	0.25	N.A	4.51e-06	0.9	MX1	Transcript	protein coding	N.A
34465742	rs10831496	11	88824823	SNV	intronic variant	Common variant	A	G	0.25	N.A	4.04e-08	1.4	GRM5	Transcript	protein coding	Publication: Suntan
32558485	rs11088551	21	41508389	SNV	upstream	Common variant	A	G	0.25	N.A	N.A	N.A	TMPRSS2	Transcript	N.A	N.A
34545062 , 33396837	rs35899679	21	41491393	SNV	intronic variant	Common variant	C	A	0.25	0.0048	0.8959	N.A	TMPRSS2	Transcript	protein coding	N.A
34545062 , 33396837	rs35041537	21	41491442	SNV	intronic variant	Common variant	C	T	0.25	0.0061	0.8831	N.A	TMPRSS2	Transcript	protein coding	N.A
34655949, 33748697	rs9983330	21	41478326	SNV	intronic variant	Common variant	A	G	0.23	0.91	3.12e-06	0.9	MX1	Transcript	protein coding	N.A
34655949, 33748697	rs9985159	21	41476757	SNV	intronic variant	Common variant	C	T	0.23	0.98	5.8e-06	0.9	TMPRSS2	Transcript	protein coding	N.A
33396837, 33838280	rs12252	11	320772	SNV	Splice region	Common variant	A	G	0.23	0.1725	0.0419	2.2	IFITM3	Transcript	protein coding	Publication, OMIM, and ClinVar: Influenza, Hypercholesterolemia, Dengue Fever, Pneumonia, Liver carcinoma, HIV-1 infection
34545062 , 33396837	rs34624090	21	41471514	DELINS	intronic variant	Common variant	_	C	0.23	0.0063	0.8809	N.A	TMPRSS2	Transcript	nonsense mediated decay	N.A
34545062 , 33396837	rs463727	21	41464259	SNV	3’ UTR variant	Common variant	T	A	0.23	0.0009	0.9547	N.A	TMPRSS2	Transcript	protein coding	N.A
32747830	rs731034	2	3629432	SNV	intronic variant	Common variant	T	C	0.22	N.A	0.00354756	1.3	COLEC11	Transcript	protein coding	N.A
33396837	rs2298659	21	41473447	SNV	Synonymous variant	Common variant	G	A	0.21	0.7236	0.0318	N.A	TMPRSS2	Transcript	protein coding	N.A
33042114, 32451547	rs429358	19	44908684	SNV	missense variant	Common variant	T	C	0.2	N.A	N.A	2.4	APOE	Transcript	protein coding	Publication: Alzheimer's Disease, OMIM and ClinVar: Alzheimer disease, hyperlipoproteinemia
33396837 , 34545062	rs6598045	11	321001	SNV	5’UTR variant	Common variant	A	G	0.19	0.8901	0.0047	N.A	IFITM3	Transcript	non-stop decay	Publication: Influenza
34545062 , 33396837	rs34481144	11	320836	SNV	5’ UTR variant	Common variant	C	T	0.19	0.017	0.8055	N.A	IFITM3	Transcript	non-stop decay	Publication: Influenza
34545062, 20066004, 24743543, 36187959	rs495828	9	133279294	SNV	intronic variant	Common variant	G	T	0.19	N.A	2e-12	0.95	ABO	Transcript	protein coding	Publication: Diabetes Mellitus Non-Insulin-Dependent, Red Blood Cell Count measurement
34465742	rs1712779	11	114726432	DELINS	intronic variant	Common variant	A	T	0.17	N.A	1.38 × 10−8	0.62	NXPE2	Transcript	enhancer	N.A
34429161 , 34315903, 35922517	rs4801778	19	48867352	SNV	intronic variant	Common variant	G	T	0.17	N.A	8e-14	0.96	PLEKHA4	Transcript	protein coding	N.A
33396837	rs1800795	7	22727026	SNV	intronic variant	Common variant	C	G	0.15	0.0136	0.826	N.A	IL6	Transcript	protein coding	Publication: Alzheimer's Disease, OMIM and ClinVar: RHEUMATOID ARTHRITIS, KAPOSI SARCOMA, DIABETES MELLITUS, TYPE 1 and 2, CROHN DISEASE-ASSOCIATED GROWTH FAILURE, INTRACRANIAL HEMORRHAGE IN BRAIN CEREBROVASCULAR MALFORMATIONS
33396837	rs3787950	21	41494369	SNV	Synonymous variant	Common variant	T	C	0.15	0.6165	0.0643	N.A	TMPRSS2	Transcript	protein coding	N.A
34545062, 36168886	rs12683493	9	133279490	SNV	upstream gene	Common variant	C	T	0.13	N.A	1e-13	N.A	ABO	Transcript	processed transcript	Publication: von Willebrand's factor (lab test)
34429158	rs143334143	6	31121426	SNV	intronic variant	Common variant	G	A	0.09	N.A	5.8e-18	1.9	CCHCR1	Transcript	protein coding	N.A
34545062, 32343152, 20066004	rs8176746	9	133255935	SNV	missense variant	Common variant	G	T	0.09	N.A	9.3e-05	N.A	ABO	Transcript	protein coding	Publication: Corpuscular Hemoglobin Concentration Mean
34429160 , 34315903	rs2271616	3	45796521	SNV	5’UTR variant	Common variant	G	T	0.08	N.A	N.A	1.1	SLC6A20	Transcript	processed transcript	Publication and ClinVar: Hyperglycinuria
33307546	rs73064425	3	45901089	SNV	intronic variant	Common variant	C	T	0.08	N.A	4.77e-30	2.1	LZTFL1	Transcript	protein coding	N.A
34210368 , 34429158	rs76488148	3	149000300	SNV	intronic variant	Common variant	G	T	0.07	N.A	0.03	1.3	GYG1	Transcript	protein coding	N.A
32558485	rs11385942	3	45834967	DELINS	intronic variant	Common variant	_	A	0.07	N.A	1.15e-10	1.8	CCR9, CXCR6, FYCO1, XCR1	Transcript	protein coding	N.A
34117310	rs10490770	3	45823240	SNV	Intron	Common variant	T	C	0.06	N.A	N.A	2	LOC107986083	Transcript	N.A	N.A
33298875	rs143359233	12	132786788	SNV	splice acceptor	Common variant	C	T	0.06	N.A	N.A	N.A	GOLGA3	Transcript	protein coding	N.A
34210368 , 34429158	rs2034831	2	181488719	SNV	intronic variant	Common variant	A	C	0.05	N.A	0.01	1.2	ITGA4	Transcript	protein coding	N.A
34210368, 34429158	rs35652899	3	45867022	SNV	intronic variant	Common variant	C	G	0.05	N.A	N.A	1.2	LZTFL1	Transcript	miscRNA	N.A
34210368, 34429158	rs76374459	3	45859142	SNV	intronic variant	Common variant	G	C	0.05	N.A	N.A	1.2	LZTFL1	Transcript	protein coding	N.A
34155559	rs35081325	3	45848429	SNV	intronic variant	Common variant	A	T	0.05	N.A	3.32e-58	1.82	CXCR6	Transcript	protein coding	N.A	Coloclaized variants
34429158 , 34315903, 34237774	rs1886814	6	41534945	SNV	intronic variant	Common variant	A	C	0.04	N.A	1e-09	1.3	FOXP4	Transcript	lncRNA	N.A
33307546	rs74956615	19	10427721	SNV	3’UTR variant	Common variant	T	A	0.03	N.A	2.3e-08	1.6	TYK2	Transcript	nonsense mediated decay	Publication: Rheumatoid Arthritis, Cholangitis Sclerosing, Ulcerative Colitis, Crohn Disease, Psoriasis, Ankylosing spondylitis
32747830	rs61821114	1	207437622	SNV	regulatory region	Common variant	C	T	0.03	N.A	0.00164162	1.9	CD55	regulatory	enhancer	N.A
33396837	rs35803318	X	15564086	SNV	Synonymous variant	Common variant	C	T	0.03	0.3933	0.1826	N.A	ACE2	Transcript	protein coding	N.A
32747830	rs72729504	1	94474650	SNV	regulatory region	Common variant	C	T	0.02	N.A	0.143262	1.3	F3	regulatory	promoter flanking region	N.A
34429162 , 34315903	rs72711165	8	124324323	SNV	intronic variant	Common variant	T	C	0.02	N.A	2e-09	1.4	TMEM65	Transcript	protein coding	N.A
32747830	rs61821041	1	207179236	SNV	regulatory region	Common variant	A	G	0.02	N.A	0.00755537	1.8	CD55	regulatory	open chromatin region	N.A
32747830	rs45574833	1	207126725	SNV	missense variant, downstream gene	Common variant	G	A	0.02	N.A	0.000925046	2	C4BPA , LOC107985251	Transcript	protein coding, lncRNA	Publication: Atypical Hemolytic Uremic Syndrome
34210368 , 34429158	rs115492982	1	150299131	SNV	intronic variant	Common variant	G	A	0.02	N.A	N.A	2.5	MRPS21	Transcript	protein coding	N.A
34545062, 32917283, 33133145	rs41303171	X	15564175	SNV	missense variant	Common variant	T	C	0.02	N.A	N.A	N.A	ACE2	Transcript	protein coding	N.A
34545062, 33374416	rs4646114	X	15601259	SNV	upstream gene	Common variant	C	T	0.02	N.A	N.A	N.A	ACE2, GS1-594A7.3	Transcript	protein coding	N.A
32511494	rs12064775	1	196631475	SNV	intergenic variant	Rare variant	A	G	0.01	N.A	0.00102978	1.8	CFH	Transcript	N.A	N.A
34545062, 35811452	rs4303794	21	41508379	SNV	upstream gene	Rare variant	G	A	0.01	N.A	N.A	N.A	TMPRSS2	Transcript	protein coding	N.A
34545062, 34834033	rs191860450	X	15575706	SNV	missense variant	Rare variant	A	G	0.01	N.A	N.A	N.A	ACE2	Transcript	protein coding	N.A
34016183	rs1805128	21	34449382	SNV	missense variant	Rare variant	C	T	0.009	N.A	N.A	9	KCNE1	Transcript	protein coding	Publication: Cardiac Arrhythmia, Atrial Fibrillation, Long QT Syndrome, OMIM: LONG QT SYNDROME , and ClinVar: Long QT syndrome, Cardiovascular phenotype, Jervell and Lange-Nielsen syndrome 2
34545062, 35811452	rs61299115	21	41508410	SNV	upstream gene	Rare variant	C	G	0.009	N.A	N.A	N.A	TMPRSS2	Transcript	protein coding	N.A
34016183	rs7626962	3	38579416	SNV	missense variant	Rare variant	G	T	0.008	N.A	N.A	8.7	SCN5A	Transcript	protein coding	Publication: heart disease, ClinVar: Cardiac arrhythmia, Cardiovascular phenotype, Congenital long QT syndrome
34201032	rs61756766	22	41925447	SNV	missense variant	Rare variant	G	A	0.008	N.A	N.A	12.3	TNFRSF13C	Transcript	protein coding	ClinVar: Immunodeficiency
33432184	rs114363287	21	41494374	SNV	missense variant	Rare variant	G	A	0.006	N.A	N.A	N.A	TMPRSS2	Transcript	nonsense mediated decay	N.A
32558485	rs117665206	6	158608455	SNV	missense variant	Rare variant	G	T	0.006	N.A	N.A	N.A	TMEM181	Transcript	N.A	N.A
34545062 , 32917283	rs140312271	X	15570303	SNV	missense variant	Rare variant	G	C	0.006	N.A	0.0088	N.A	ACE2	Transcript	protein coding	N.A
34545062, 34001841	rs4646116	X	15600835	SNV	missense variant	Rare variant	T	C	0.006	N.A	N.A	N.A	ACE2	Transcript	protein coding	N.A
32558485	rs150892504	5	96909661	SNV	missense variant	Rare variant	C	T	0.004	N.A	N.A	N.A	ERAP2	Transcript	N.A	N.A
34429158 , 32972995	rs769208985	15	90878816	SNV	missense variant	Rare variant	G	A	0.004	N.A	0.0047	N.A	FURIN	Transcript	protein coding	N.A
34545062	rs4646115	X	15601146	SNV	upstream gene	Rare variant	T	C	0.004	N.A	N.A	N.A	GS1-594A7.3	Transcript	protein coding	N.A
34429165 , 34315903	rs147149459	17	8103390	SNV	missense variant	Rare variant	G	A	0.002	N.A	N.A	N.A	ALOXE3	Transcript	protein coding	OMIM: ICHTHYOSIS, CONGENITAL, AUTOSOMAL RECESSIVE 3, ClinVar: ICHTHYOSIS, CONGENITAL, AUTOSOMAL RECESSIVE 3, Lamellar ichthyosis
34429164 , 34315903	rs138763430	8	37849759	SNV	missense variant	Rare variant	C	T	0.002	N.A	N.A	N.A	BRF2	Transcript	N.A	N.A
34545062, 33650967	rs147244662	X	12888602	SNV	missense variant	Rare variant	G	A	0.0006	N.A	N.A	N.A	TLR7	Transcript	protein coding	N.A
34545062, 33650968	rs189681811	X	12888267	SNV	missense variant	Rare variant	G	A	0.0002	N.A	N.A	N.A	TLR7	Transcript	protein coding	N.A

## Sheet: T2 Risk varint-disease mapping
Network number	Risk gene	Risk variant	Chrom.	Pos.	Type	Diseases (Publication, OMIM, ClinVar)	Related system
16	TNFRSF13C	rs61756766	22	41925447	SNV	ClinVar: Immunodeficiency	Immune system
13	ABO	rs8176740	9	133256085	SNV	ClinVar: Three Vessel Coronary Disease
1	TLR7	rs200553089	X	12887891	SNV	OMIM and ClinVar: IMMUNODEFICIENCY	Immune system
1	TLR7	rs2042915990	X	12887637	SNV	OMIM and ClinVar: IMMUNODEFICIENCY	Immune system
Orphen protein	ALOXE3	rs147149459	17	8103390	SNV	OMIM: ICHTHYOSIS, AUTOSOMAL RECESSIVE , ClinVar: ICHTHYOSIS, AUTOSOMAL RECESSIVE, Lamellar ichthyosis	Integumentary systems
21	SLC6A20	rs2271616	3	45796521	SNV	Publication and ClinVar: Hyperglycinuria	Neuron system
1	IFITM3	rs12252	11	320772	SNV	Publication, OMIM, and ClinVar: Influenza, hypercholesterolemia, dengue fdever, pneumonia, hepatoma, HIV-1 infection	Immune system
1	A2M	rs4883215	12	9161611	SNV	Publication: Alzheimer's Disease	Neuron system
3	ACE	rs4343	17	63488670	SNV	Publication: Alzheimer's Disease, high Serum albumin level, ClinVar: Myocardial infarction, Renal tubular dysgenesis of genetic origin	Neuron and metabolic systems
1	A2M	rs669	12	9079672	SNV	Publication: Alzheimer's Disease, OMIM and ClinVar: ALPHA-2-MACROGLOBULIN POLYMORPHISM	Neuron system
1	APOE	rs429358	19	44908684	SNV	Publication: Alzheimer's Disease, OMIM and ClinVar: Alzheimer disease, hyperlipoproteinemia	Neuron system
1	ITGA4,IL6	rs1800795	7	22727026	SNV	Publication: Alzheimer's Disease, OMIM and ClinVar: RHEUMATOID ARTHRITIS, KAPOSI SARCOMA, DIABETES MELLITUS, TYPE 1 and 2, CROHN DISEASE-ASSOCIATED GROWTH FAILURE, INTRACRANIAL HEMORRHAGE IN BRAIN CEREBROVASCULAR MALFORMATIONS	Neuron and metabolic systems
2	CFH	rs13168774	5	132404964	SNV	Publication: Asthma, Systemic primary carnitine deficiency (CDSP)	Respiratory and metabolic systems
7	LZTFL1	rs13168774	5	132404964	SNV	Publication: Asthma, Systemic primary carnitine deficiency (CDSP)	Respiratory and metabolic systems
13	ABO	rs13168774	5	132404964	SNV	Publication: Asthma, Systemic primary carnitine deficiency (CDSP)	Respiratory and metabolic systems
21	SLC6A20	rs13168774	5	132404964	SNV	Publication: Asthma, Systemic primary carnitine deficiency (CDSP)	Respiratory and metabolic systems
2	C4BPA	rs45574833	1	207126725	SNV	Publication: Atypical Hemolytic Uremic Syndrome	Renal system
1	OAS1	rs4767027	12	112921352	SNV	Publication: Blood Protein Measurement, OMIM and ClinVar: OAS1 POLYMORPHISM	Hematopoietic system
17	KCNE1	rs1805128	21	34449382	SNV	Publication: Cardiac Arrhythmia, Atrial Fibrillation, Long QT Syndrome, OMIM: LONG QT SYNDROME , and ClinVar: Long QT syndrome, Cardiovascular phenotype, Jervell and Lange-Nielsen syndrome 2	Cardiovascular system
3	ACE2	rs2074192	X	15564667	SNV	Publication: Cardiovascular Diseases, Essential Hypertension	Cardiovascular and circulatory systems
3	ACE	rs4341	17	63488629	SNV	Publication: Diabetes and hypertension, ClinVar: Renal tubular dysgenesis of genetic origin	Metabolic and circulatory systems
13	ABO	rs495828	9	133279294	SNV	Publication: Diabetes Mellitus Non-Insulin-Dependent, high level of red blood cell count	Metabolic system
3	ACE2	rs2285666	X	15592225	SNV	Publication: Diabetes Mellitus Non-Insulin-Dependent, Hypertensive disease, Dyslipidemias, Orthostatic hypertension	Metabolic and circulatory systems
1	NR1H2	rs1405655	19	50379362	SNV	Publication: Diabetes Mellitus Non-Insulin-Dependent, Inflammatory Bowel Diseases, Tuberculosis (TB)	Immune and metabolic systems
3	ACE2	rs2106809	X	15599938	SNV	Publication: Essential Hypertension	Circulatory systems
14	CYP24A1	rs6127099	20	54114863	SNV	Publication: Glomerular Filtration Rate, Vitamin D3 measurement, Parathyroid hormone measurement	Hematopoietic and metabolic systems
5	SCN5A	rs7626962	3	38579416	SNV	Publication: heart disease, ClinVar: Cardiac arrhythmia, Cardiovascular phenotype, Congenital long QT syndrome	Cardiovascular system
12	FURIN	rs6226	15	90881344	SNV	Publication: hypertension	Circulatory systems
12	FURIN	rs8039305	15	90879313	SNV	Publication: hypertension	Circulatory systems
3	DPP9	rs2109069	19	4719443	SNV	Publication: idiopathic pulmonary fibrosis	Respiratory system
20	TMPRSS2	rs2070788	21	41470061	SNV	Publication: influenza due to Influenza A virus subtype H7N9	Immune system
13	ABO	rs8176746	9	133255935	SNV	Publication: low Mean Corpuscular Hemoglobin Concentration (MCHC)	Hematopoietic system
3	DPP9	rs12610495	19	4717660	SNV	Publication: Lung Diseases Interstitial	Respiratory system
20	TMPRSS2	rs12329760	21	41480570	SNV	Publication: Prostate carcinoma	Reproductive system
1	TYK2	rs74956615	19	10427721	SNV	Publication: Rheumatoid Arthritis, Cholangitis Sclerosing, Ulcerative Colitis, Crohn Disease, Psoriasis, Ankylosing spondylitis	Metabolic and integumentary systems
1	IFITM3	rs34481144	11	320836	SNV	Publication: Severe influenza	Immune system
1	IFITM3	rs6598045	11	321001	SNV	Publication: Severe influenza	Immune system
10	GRM5	rs10831496	11	88824823	SNV	Publication: Suntan	Integumentary systems
13	ABO	rs505922	9	133273813	SNV	Publication: Venous thromboembolism (VTE), low level of thyroid stimulating hormone	Hematopoietic system
13	ABO	rs12683493	9	133279490	SNV	Publication: Von Willebrand disease (VWD) (lab test)	Hematopoietic system
14	GC	rs11723621	4	71749645	SNV	Publication: White Blood Cell Count procedure	Immune and hematopoietic systems
1	IFNAR2	rs13050728	21	33242905	SNV	N.A	N.A
1	TLR7	rs147244662	X	12888602	SNV	N.A	N.A
1	TLR7	rs189681811	X	12888267	SNV	N.A	N.A
1	ITGA4	rs2034831	2	181488719	SNV	N.A	N.A
1	IFNAR2	rs2236757	21	34624917	SNV	N.A	N.A
1	MX1	rs2298661	21	41473715	SNV	N.A	N.A
1	MX1	rs464397	21	41428591	SNV	N.A	N.A
1	MX1	rs469390	21	41446003	SNV	N.A	N.A
1	TMEM189-UBE2V1	rs6020298	20	50152518	SNV	N.A	N.A
1	AHNAK	rs677800	11	62498829	SNV	N.A	N.A
1	MAPT	rs8065800	17	45933112	SNV	N.A	N.A
1	MX1	rs9983330	21	41478326	SNV	N.A	N.A
2	F3	rs72729504	1	94474650	SNV	N.A	N.A
2	COLEC11	rs731034	2	3629432	SNV	N.A	N.A
2	CFH	rs12064775	1	196631475	SNV	N.A	N.A
2	CD55	rs61821041	1	207179236	SNV	N.A	N.A
2	CD55	rs61821114	1	207437622	SNV	N.A	N.A
3	ACE2	rs140312271	X	15570303	SNV	N.A	N.A
3	ACE2	rs191860450	X	15575706	SNV	N.A	N.A
3	ACE2	rs35803318	X	15564086	SNV	N.A	N.A
3	ACE2	rs41303171	X	15564175	SNV	N.A	N.A
3	ACE2	rs4646114	X	15601259	SNV	N.A	N.A
3	ACE2	rs4646116	X	15600835	SNV	N.A	N.A
4	NOTCH4	rs3131294	6	32180146	SNV	N.A	N.A
6	MRPS21	rs115492982	1	150299131	SNV	N.A	N.A
7	LZTFL1	rs35652899	3	45867022	SNV	N.A	N.A
7	LZTFL1	rs73064425	3	45901089	SNV	N.A	N.A
7	LZTFL1	rs76374459	3	45859142	SNV	N.A	N.A
8	HLA-G	rs9380142	6	29798794	SNV	N.A	N.A
9	GYG1	rs76488148	3	149000300	SNV	N.A	N.A
11	GOLGA3	rs143359233	12	132786788	SNV	N.A	N.A
12	FURIN	rs769208985	15	90878816	SNV	N.A	N.A
13	ABO	rs657152	9	133263862	SNV	N.A	N.A
15	BRF2	rs138763430	8	37849759	SNV	N.A	N.A
18	FYCO1	rs11385942	3	45834967	DELINS	N.A	N.A
19	XCR1	rs11385942	3	45834967	DELINS	N.A	N.A
20	TMPRSS2	rs11088551	21	41508389	SNV	N.A	N.A
20	TMPRSS2	rs114363287	21	41494374	SNV	N.A	N.A
20	TMPRSS2	rs11702475	21	41485641	SNV	N.A	N.A
20	TMPRSS2	rs17854725	21	41473456	SNV	N.A	N.A
20	TMPRSS2	rs2298659	21	41473447	SNV	N.A	N.A
20	TMPRSS2	rs34624090	21	41471514	DELIS	N.A	N.A
20	TMPRSS2	rs34783969	21	41482711	SNV	N.A	N.A
20	TMPRSS2	rs35041537	21	41491442	SNV	N.A	N.A
20	TMPRSS2	rs35899679	21	41491393	SNV	N.A	N.A
20	TMPRSS2	rs3787946	21	41475808	SNV	N.A	N.A
20	TMPRSS2	rs3787950	21	41494369	SNV	N.A	N.A
20	TMPRSS2	rs383510	21	41486440	SNV	N.A	N.A
20	TMPRSS2	rs4290734	21	41481156	SNV	N.A	N.A
20	TMPRSS2	rs4303794	21	41508379	SNV	N.A	N.A
20	TMPRSS2	rs463727	21	41464259	SNV	N.A	N.A
20	TMPRSS2	rs55964536	21	41473711	SNV	N.A	N.A
20	TMPRSS2	rs61299115	21	41508410	DELIS	N.A	N.A
20	TMPRSS2	rs734056	21	41480393	SNV	N.A	N.A
20	TMPRSS2	rs7364083	21	41472130	SNV	N.A	N.A
20	TMPRSS2	rs75603675	21	41507982	SNV	N.A	N.A
20	TMPRSS2	rs8134378	21	41521831	SNV	N.A	N.A
20	TMPRSS2	rs9974589	21	41470196	SNV	N.A	N.A
20	TMPRSS2	rs9985159	21	41476757	SNV	N.A	N.A
22	FOXP4	rs1886814	6	41534945	SNV	N.A	N.A
23	CXCR6	rs11385942	3	45834967	DELINS	N.A	N.A
23	CXCR6	rs35081325	3	45848429	SNV	N.A	N.A
24	CCR9	rs11385942	3	45834967	DELINS	N.A	N.A
Orphen protein	ERAP2	rs150892504	5	96909661	SNV	N.A	N.A
Orphen protein	NNMT	rs1712779	11	114726432	DELIS	N.A	N.A
Orphen protein	TMEM181	rs117665206	6	158608455	SNV	N.A	N.A
Orphen protein	CCHCR1	rs143334143	6	31121426	SNV	N.A	N.A
Orphen protein	PLEKHA4	rs4801778	19	48867352	SNV	N.A	N.A
Orphen protein	TMEM65	rs72711165	8	124324323	SNV	N.A	N.A
RNA gene	LOC107986083	rs10490770	3	45823240	SNV	N.A	N.A
RNA gene	LOC105378861	rs12029080	1	94587797	SNV	N.A	N.A
RNA gene	GS1-594A7.3	rs4646115	X	15601146	SNV	N.A	N.A

## Sheet: T3 List of MAF of varints
SNP	PUPULation	MAF
rs1800795	African (AFR)	0.018
	European (EUR)	0.416
	American (AMR)	0.184
	East Asian (EAS)	0.001
	South Asian (SAS)	0.139
rs2074192	African (AFR)	0.346
	European (EUR)	0.426
	American (AMR)	0.399
	East Asian (EAS)	0.428
	South Asian (SAS)	0.226
rs2285666	African (AFR)	0.211
	European (EUR)	0.235
	American (AMR)	0.336
	East Asian (EAS)	0.537
	South Asian (SAS)	0.479
rs2106809	African (AFR)	0.089
	European (EUR)	0.247
	American (AMR)	0.324
	East Asian (EAS)	0.522
	South Asian (SAS)	0.483
rs8039305	Iranians (IRN)	0.41
	Qataris (QAR)	0.49
	Europeans (EUR)	0.48
	East Asians (EAS)	0.17
	African (AFR)	0.81
rs6226	Iranians (IRN)	0.65
	Qataris (QAR)	0.69
	Europeans (EUR)	0.68
	East Asians (EAS)	0.53
	African (AFR)	0.93
	Kuwaitis (KWT)	0.72
rs6598045	African (AFR)	0.299
	European (EUR)	0.106
	American (AMR)	0.222
	East Asian (EAS)	0.141
	South Asian (SAS)	0.277
rs34481144	African (AFR)	0.043
	European (EUR)	0.462
	American (AMR)	0.233
	East Asian (EAS)	0.006
	South Asian (SAS)	0.207
rs2070788	African (AFR)	0.726
	European (EUR)	0.534
	American (AMR)	0.506
	East Asian (EAS)	0.644
	South Asian (SAS)	0.534
rs17854725	African (AFR)	0.339
	European (EUR)	0.542
	American (AMR)	0.411
	East Asian (EAS)	0.121
	South Asian (SAS)	0.444
rs2298659	African (AFR)	0.175
	European (EUR)	0.23
	American (AMR)	0.218
	East Asian (EAS)	0.249
	South Asian (SAS)	0.189
rs34624090	African (AFR)	0.096
	European (EUR)	0.442
	American (AMR)	0.241
	East Asian (EAS)	0.006
	South Asian (SAS)	0.387
rs34783969	African (AFR)	0.115
	European (EUR)	0.488
	American (AMR)	0.317
	East Asian (EAS)	0.007
	South Asian (SAS)	0.428
rs35041537	African (AFR)	0.114
	European (EUR)	0.463
	American (AMR)	0.291
	East Asian (EAS)	0.007
	South Asian (SAS)	0.385
rs35899679	African (AFR)	0.107
	European (EUR)	0.463
	American (AMR)	0.288
	East Asian (EAS)	0.007
	South Asian (SAS)	0.384
rs3787950	African (AFR)	0.218
	European (EUR)	0.079
	American (AMR)	0.061
	East Asian (EAS)	0.155
	South Asian (SAS)	0.257
rs4290734	African (AFR)	0.069
	European (EUR)	0.487
	American (AMR)	0.311
	East Asian (EAS)	0.007
	South Asian (SAS)	0.431
rs463727	African (AFR)	0.079
	European (EUR)	0.457
	American (AMR)	0.006
	East Asian (EAS)	0.272
	South Asian (SAS)	0.355
rs55964536	African (AFR)	0.101
	European (EUR)	0.483
	American (AMR)	0.288
	East Asian (EAS)	0.006
	South Asian (SAS)	0.398
rs734056	African (AFR)	0.213
	European (EUR)	0.489
	American (AMR)	0.317
	East Asian (EAS)	0.008
	South Asian (SAS)	0.434
rs7364083	African (AFR)	0.849
	European (EUR)	0.538
	American (AMR)	0.52
	East Asian (EAS)	0.645
	South Asian (SAS)	0.538
rs9974589	African (AFR)	0.727
	European (EUR)	0.536
	American (AMR)	0.507
	East Asian (EAS)	0.644
	South Asian (SAS)	0.535

## Sheet: T4 AE of risk variants
Risk Gene	# of common risk varint	Cumulative OR	Cumulative MAF	Max. MAF	Max. OR	AVE.OR	AVE.MAF	AE	Mean(AE)
GOLGA3	1	0	0.06	0	0.06	0	0.06	0.06	0.06
SLC6A20	1	1.1	0.08	1.1	0.08	1.1	0.08	0.088	0.088
GYG1	1	1.3	0.07	1.3	0.07	1.3	0.07	0.091	0.091
NXPE2	1	0.62	0.17	0.62	0.17	0.62	0.17	0.1054	0.1054
LOC107986083	1	2	0.06	2	0.06	2	0.06	0.12	0.12
CCR9	1	1.8	0.07	1.8	0.07	1.8	0.07	0.126	0.126
CXCR6	1	1.8	0.07	1.8	0.07	1.8	0.07	0.126	0.126
FYCO1	1	1.8	0.07	1.8	0.07	1.8	0.07	0.126	0.126
XCR1	1	1.8	0.07	1.8	0.07	1.8	0.07	0.126	0.126
OAS1	1	0.5	0.28	0.5	0.28	0.5	0.28	0.14	0.14
IL6	1	0	0.15	0	0.15	0	0.15	0.15	0.15
PLEKHA4	1	0.96	0.17	0.96	0.17	0.96	0.17	0.1632	0.1632
LZTFL1	1	2.1	0.08	2.1	0.08	2.1	0.08	0.168	0.168
CCHCR1	1	1.9	0.09	1.9	0.09	1.9	0.09	0.171	0.171
COLEC11	1	1.3	0.22	1.3	0.22	1.3	0.22	0.286	0.286
CYP24A1	1	0	0.288	0	0.288	0	0.288	0.288	0.288
GC	1	0	0.29	0	0.29	0	0.29	0.29	0.29
GRM5	1	1.4	0.25	1.4	0.25	1.4	0.25	0.35	0.35
LOC105378861	1	1.05	0.35	1.05	0.35	1.05	0.35	0.3675	0.3675
HLA-G	1	1.3	0.29	1.3	0.29	1.3	0.29	0.377	0.377
MAPT	1	1.2	0.33	1.2	0.33	1.2	0.33	0.396	0.396
NR1H2	1	1.1	0.37	1.1	0.37	1.1	0.37	0.407	0.407
APOE	1	2.4	0.2	2.4	0.2	2.4	0.2	0.48	0.48
AHNAK	1	0	0.55	0	0.55	0	0.55	0.55	0.55
PEDS1-UBE2V1	1	1.2	0.58	1.2	0.58	1.2	0.58	0.696	0.696
MX1	4	1.8	0.56	0.9	0.59	0.45	0.3875	1.008	0.252
ACE2	3	0	1.07	0.95	0.19	0	0.356667	1.07	0.356667
A2M	2	1.57	0.75	0.79	0.38	0.785	0.375	1.1775	0.58875
IFITM3	3	2.2	0.61	2.2	0.23	0.9	0.203333	1.342	0.447333
NOTCH4	1	1.5	0.9	1.5	0.9	1.5	0.9	1.35	1.35
DPP9	2	2.7	0.64	1.4	0.33	1.35	0.32	1.728	0.864
ACE	2	2.1	0.93	2.1	0.49	1.05	0.465	1.953	0.9765
FURIN	2	2.1	1.15	1.1	0.68	1.05	0.575	2.415	1.2075
IFNAR2	2	2.1	1.37	1.3	0.71	1.05	0.685	2.877	1.4385
ABO	6	3.15	1.96	1.3	0.66	0.525	0.326667	6.174	1.029
TMPRSS2	22	4.7	7.03	2	0.62	0.213636	0.319545	33.041	1.50186

## Sheet: T5 WOR 
Risk gene	MAF	P-Value	OR	WOR
IFNAR2	0.66	1e-16	0.8	0.792
A2M	0.37	0.00045	0.78	0.4329
A2M	0.38	0.000654	0.79	0.4503
ABO	0.09	9.3e-05	0	0.135
ABO	0.13	1e-13	0	0.195
ABO	0.19	2e-12	0.95	0.27075
ABO	0.35	4.95e-08	1.3	0.6825
ABO	0.54	0	0	0.81
ABO	0.66	2e-22	0.9	0.891
ACE	0.44	3e-25	2.1	1.386
ACE	0.49	0	0	0.735
ACE2	0.33	0.667	0	0.495
ACE2	0.37	0.0526	0	0.555
ACE2	0.37	0.824	0	0.555
ACE2	0.006	0.0088	0	0.009
ACE2	0.006	0	0	0.009
ACE2	0.01	0	0	0.015
ACE2	0.02	0	0	0.03
ACE2	0.03	0.183	0	0.045
ACE2, GS1-594A7.3	0.02	0	0	0.03
AHNAK	0.03	0	0	0.045
ALOXE3	0.002	0	0	0.003
APOE	0.2	0	2.4	0.72
BRF2	0.002	0	0	0.003
C4BPA , LOC107985251	0.02	0.000925	2	0.06
CCHCR1	0.09	5.8e-18	1.9	0.2565
CCR9	0.07	1.15e-10	1.8	0.189
CD55	0.02	0.00756	1.8	0.054
CD55	0.03	0.00164	1.9	0.0855
CFH	0.01	0.00103	1.8	0.027
COLEC11	0.22	0.00355	1.3	0.429
CXCR6	0.07	1.15e-10	1.8	0.189
CXCR6	0.05	3.32e-58	1.82	0.1365
CYP24A1	0.288	2e-17	0	0.432
DPP9	0.31	4e-36	1.3	0.6045
DPP9	0.33	3.98e-12	1.4	0.693
ERAP2	0.004	0	0	0.006
F3	0.02	0.143	1.3	0.039
FOXP4	0.04	1e-09	1.3	0.078
FURIN	0.47	1.76e-38	1.1	0.7755
FURIN	0.3	1.36e-09	1	0.45
FURIN	0.004	0.0047	0	0.006
FYCO1	0.07	1.15e-10	1.8	0.189
GC	0.29	5e-08	0	0.435
GOLGA3	0.06	0	0	0.09
GRM5	0.25	4.04e-08	1.4	0.525
GS1-594A7.3	0.004	0	0	0.006
GYG1	0.07	0.03	1.3	0.1365
HLA-G	0.29	1.8e-08	1.3	0.5655
IFITM3	0.19	0.0047	0	0.285
IFITM3	0.19	0.806	0	0.285
IFITM3	0.23	0.0419	2.2	0.759
IFNAR2	0.3	4.99e-08	1.3	0.585
IL6	0.15	0.826	0	0.225
ITGA4	0.05	0.01	1.2	0.09
KCNE1	0.009	0	9	0.1215
LOC105378861	0.35	0	1.05	0.55125
LOC107986083	0.06	0	2	0.18
LZTFL1	0.08	4.77e-30	2.1	0.252
LZTFL1	0.05	0	1.2	0.09
LZTFL1	0.05	0	1.2	0.09
MAPT	0.33	0	1.2	0.594
MRPS21	0.02	0	2.5	0.075
MX1	0.23	3.12e-06	0.9	0.3105
MX1	0.25	4.51e-06	0.9	0.3375
MX1	0.48	0	0	0.72
MX1	0.59	0	0	0.885
NOTCH4	0.9	2.3e-08	1.5	2.025
NR1H2	0.37	0	1.1	0.6105
NXPE2	0.17	1.38 × 10−8	0.62	0.1581
OAS1	0.28	7e-08	0.5	0.21
PEDS1-UBE2V1	0.58	4.1e-06	1.2	1.044
PLEKHA4	0.17	8e-14	0.96	0.2448
SCN5A	0.008	0	8.7	0.1044
SLC6A20	0.08	0	1.1	0.132
TLR7	0.0002	0	0	0.0003
TLR7	0.0006	0	0	0.0009
TMEM181	0.006	0	0	0.009
TMEM65	0.02	2e-09	1.4	0.042
TMPRSS2	0.15	0.0643	0	0.225
TMPRSS2	0.21	0.0318	0	0.315
TMPRSS2	0.23	5.8e-06	0.9	0.3105
TMPRSS2	0.23	0.881	0	0.345
TMPRSS2	0.23	0.955	0	0.345
TMPRSS2	0.25	3.13e-06	0.9	0.3375
TMPRSS2	0.25	0	0	0.375
TMPRSS2	0.25	0.896	0	0.375
TMPRSS2	0.25	0.883	0	0.375
TMPRSS2	0.26	0.9	0	0.39
TMPRSS2	0.26	0.977	0	0.39
TMPRSS2	0.27	0.875	0	0.405
TMPRSS2	0.27	0.879	0	0.405
TMPRSS2	0.28	2.73 × 10−6	0.9	0.378
TMPRSS2	0.29	0.762	0	0.435
TMPRSS2	0.36	0	0	0.54
TMPRSS2	0.36	0	0	0.54
TMPRSS2	0.37	0.932	0	0.555
TMPRSS2	0.46	0.002	2	1.38
TMPRSS2	0.59	0.452	0	0.885
TMPRSS2	0.59	0.349	0	0.885
TMPRSS2	0.62	0.34	0	0.93
TMPRSS2	0.006	0	0	0.009
TMPRSS2	0.009	0	0	0.0135
TMPRSS2	0.01	0	0	0.015
TNFRSF13C	0.008	0	12.3	0.1476
TYK2	0.03	2.3e-08	1.6	0.072
XCR1	0.07	1.15e-10	1.8	0.189

## Sheet: T6 EOR
Risk variant	MAF	Risk gene	EOR	EOR*c=1.1	EOR*c=1.2	EOR*c=1.3	EOR*c=1.4	EOR*c=1.5
rs74956615	0.03	TYK2	1.09887	1.20876	1.20876	1.42854	1.53842	1.64831
rs463727	0.2	TMPRSS2	1.53506	1.68857	2.30259	1.99558	2.14909	2.30259
rs9380142	0.3	HLA-G	1.21792	1.33971	1.82688	1.58329	1.70509	1.82688
rs2271616	0.08	SLC6A20	0.800229	0.880252	1.20034	1.0403	1.12032	1.20034
rs34481144	0.2	IFITM3	1.00172	1.10189	1.50257	1.30223	1.4024	1.50257
rs6598045	0.2	IFITM3	0.907686	0.998454	1.36153	1.17999	1.27076	1.36153
rs2042915990	0	TLR7	0.948515	1.04337	1.42277	1.23307	1.32792	1.42277
rs12064775	0.01	CFH	0.800229	0.880252	1.20034	1.0403	1.12032	1.20034
rs6127099	0.3	CYP24A1	0.800229	0.880252	1.20034	1.0403	1.12032	1.20034
rs72711165	0.02	TMEM65	0.907686	0.998454	1.36153	1.17999	1.27076	1.36153
rs115492982	0.02	MRPS21	1.1904	1.30944	1.78559	1.54751	1.66655	1.78559
rs1886814	0.04	FOXP4	0.922589	1.01485	1.38388	1.19937	1.29162	1.38388
rs2034831	0.05	ITGA4	1.29693	1.42662	1.9454	1.68601	1.8157	1.9454
rs35652899	0.05	LZTFL1	1.04827	1.1531	1.57241	1.36275	1.46758	1.57241
rs76374459	0.05	LZTFL1	1.18192	1.30012	1.77288	1.5365	1.65469	1.77288
rs35081325	0.05	CXCR6	0.871846	0.95903	1.30777	1.1334	1.22058	1.30777
rs10490770	0.06	LOC107986083	1.18024	1.29826	1.77035	1.53431	1.65233	1.77035
rs76488148	0.07	GYG1	0.909243	1.00017	1.36386	1.18202	1.27294	1.36386
rs11385942	0.07	CCR9, CXCR6, FYCO1, XCR1	0.907686	0.998454	1.36153	1.17999	1.27076	1.36153
rs73064425	0.08	LZTFL1	1.1904	1.30944	1.78559	1.54751	1.66655	1.78559
rs143334143	0.09	CCHCR1	1.03888	1.14277	1.55832	1.35054	1.45443	1.55832
rs9985159	0.2	TMPRSS2	0.88692	0.975612	1.33038	1.153	1.24169	1.33038
rs34624090	0.2	TMPRSS2	0.909243	1.00017	1.36386	1.18202	1.27294	1.36386
rs731034	0.2	COLEC11	0.909789	1.00077	1.36468	1.18273	1.2737	1.36468
rs1712779	0.2	NXPE2	0.908464	0.99931	1.3627	1.181	1.27185	1.3627
rs495828	0.2	ABO	0.941765	1.03594	1.41265	1.22429	1.31847	1.41265
rs4801778	0.2	PLEKHA4	0.766658	0.843324	1.14999	0.996656	1.07332	1.14999
rs1800795	0.2	IL6	0.83527	0.918797	1.25291	1.08585	1.16938	1.25291
rs9983330	0.2	MX1	0.913892	1.00528	1.37084	1.18806	1.27945	1.37084
rs8065800	0.3	MAPT	0.942303	1.03653	1.41345	1.22499	1.31922	1.41345
rs2109069	0.3	DPP9	0.909945	1.00094	1.36492	1.18293	1.27392	1.36492
rs2106809	0.3	ACE2	0.906131	0.996744	1.3592	1.17797	1.26858	1.3592
rs12610495	0.3	DPP9	0.910023	1.00102	1.36503	1.18303	1.27403	1.36503
rs4767027	0.3	OAS1	0.945809	1.04039	1.41871	1.22955	1.32413	1.41871
rs11723621	0.3	GC	0.910023	1.00102	1.36503	1.18303	1.27403	1.36503
rs734056	0.3	TMPRSS2	0.703682	0.77405	1.05552	0.914787	0.985155	1.05552
rs3787946	0.3	TMPRSS2	0.766658	0.843324	1.14999	0.996656	1.07332	1.14999
rs11702475	0.3	TMPRSS2	0.800229	0.880252	1.20034	1.0403	1.12032	1.20034
rs34783969	0.3	TMPRSS2	1.21792	1.33971	1.82688	1.58329	1.70509	1.82688
rs55964536	0.3	TMPRSS2	1.67483	1.84232	2.51225	2.17728	2.34477	2.51225
rs4290734	0.3	TMPRSS2	0.960241	1.05626	1.44036	1.24831	1.34434	1.44036
rs10831496	0.3	GRM5	0.766658	0.843324	1.14999	0.996656	1.07332	1.14999
rs35899679	0.3	TMPRSS2	0.83527	0.918797	1.25291	1.08585	1.16938	1.25291
rs35041537	0.3	TMPRSS2	1.04827	1.1531	1.57241	1.36275	1.46758	1.57241
rs1405655	0.4	NR1H2	2.38691	2.6256	3.58037	3.10298	3.34168	3.58037
rs2074192	0.4	ACE2	0.83527	0.918797	1.25291	1.08585	1.16938	1.25291
rs12029080	0.4	LOC105378861	0.83527	0.918797	1.25291	1.08585	1.16938	1.25291
rs657152	0.4	ABO	0.800229	0.880252	1.20034	1.0403	1.12032	1.20034
rs4341	0.5	ACE	0.800229	0.880252	1.20034	1.0403	1.12032	1.20034
rs464397	0.5	MX1	0.974614	1.07207	1.46192	1.267	1.36446	1.46192
rs8039305	0.5	FURIN	0.945809	1.04039	1.41871	1.22955	1.32413	1.41871
rs383510	0.5	TMPRSS2	0.898397	0.988237	1.3476	1.16792	1.25776	1.3476
rs7364083	0.6	TMPRSS2	0.800229	0.880252	1.20034	1.0403	1.12032	1.20034
rs2070788	0.6	TMPRSS2	1.04827	1.1531	1.57241	1.36275	1.46758	1.57241
rs9974589	0.6	TMPRSS2	0.83527	0.918797	1.25291	1.08585	1.16938	1.25291
rs6020298	0.6	PEDS1-UBE2V1	1.99657	2.19622	2.99485	2.59554	2.79519	2.99485
rs677800	0.6	AH0K	0.902256	0.992481	1.35338	1.17293	1.26316	1.35338
rs2236757	0.7	IF0R2	0.800229	0.880252	1.20034	1.0403	1.12032	1.20034
rs13050728	0.7	IF0R2	1.34986	1.48484	2.02479	1.75482	1.8898	2.02479
rs505922	0.7	ABO	0.906131	0.996744	1.3592	1.17797	1.26858	1.3592
rs3131294	0.9	NOTCH4	0.734495	0.807945	1.10174	0.954844	1.02829	1.10174
rs189681811	0.0002	TLR7	1.77586	1.95345	2.66379	2.30862	2.48621	2.66379
rs147244662	0.0006	TLR7	0.939078	1.03299	1.40862	1.2208	1.31471	1.40862
rs147149459	0.002	ALOXE3	0.83527	0.918797	1.25291	1.08585	1.16938	1.25291
rs138763430	0.002	BRF2	0.734495	0.807945	1.10174	0.954844	1.02829	1.10174
rs150892504	0.004	ERAP2	0.902256	0.992481	1.35338	1.17293	1.26316	1.35338
rs769208985	0.004	FURIN	0.908464	0.99931	1.3627	1.181	1.27185	1.3627
rs114363287	0.006	TMPRSS2	0.907686	0.998454	1.36153	1.17999	1.27076	1.36153
rs117665206	0.006	TMEM181	0.703682	0.77405	1.05552	0.914787	0.985155	1.05552
rs140312271	0.006	ACE2	0.929734	1.02271	1.3946	1.20865	1.30163	1.3946
rs4646116	0.006	ACE2	1.0202	1.12222	1.5303	1.32626	1.42828	1.5303
rs1805128	0.009	KCNE1	1.05579	1.16136	1.58368	1.37252	1.4781	1.58368
rs191860450	0.01	ACE2	1.0202	1.12222	1.5303	1.32626	1.42828	1.5303
rs41303171	0.02	ACE2	1.26581	1.39239	1.89872	1.64556	1.77214	1.89872
rs45574833	0.02	C4BPA , LOC107985251	0.800229	0.880252	1.20034	1.0403	1.12032	1.20034
rs8176746	0.09	ABO	1.44567	1.59023	2.1685	1.87937	2.02394	2.1685
rs429358	0.2	APOE	0.910023	1.00102	1.36503	1.18303	1.27403	1.36503
rs12329760	0.3	TMPRSS2	0.800229	0.880252	1.20034	1.0403	1.12032	1.20034
rs2298661	0.3	MX1	0.906519	0.997171	1.35978	1.17848	1.26913	1.35978
rs4883215	0.4	A2M	0.935329	1.02886	1.40299	1.21593	1.30946	1.40299
rs669	0.4	A2M	0.951094	1.0462	1.42664	1.23642	1.33153	1.42664
rs75603675	0.4	TMPRSS2	1.35759	1.49335	2.03639	1.76487	1.90063	2.03639
rs8176740	0.5	ABO	1.28954	1.41849	1.93431	1.6764	1.80536	1.93431
rs469390	0.6	MX1	0.83527	0.918797	1.25291	1.08585	1.16938	1.25291
rs200553089	0	TLR7	1.05579	1.16136	1.58368	1.37252	1.4781	1.58368
rs60220284	0	PEDS1-UBE2V1	0.703682	0.77405	1.05552	0.914787	0.985155	1.05552
rs72729504	0.02	F3	0.927876	1.02066	1.39181	1.20624	1.29903	1.39181
rs61821041	0.02	CD55	0.926022	1.01862	1.38903	1.20383	1.29643	1.38903
rs61821114	0.03	CD55	1.04022	1.14424	1.56032	1.35228	1.4563	1.56032
rs143359233	0.06	GOLGA3	1.08329	1.19162	1.62493	1.40827	1.5166	1.62493
rs8134378	0.4	TMPRSS2	0.800229	0.880252	1.20034	1.0403	1.12032	1.20034
rs12252	0.2	IFITM3	0.703682	0.77405	1.05552	0.914787	0.985155	1.05552
rs2285666	0.4	ACE2	0.942572	1.03683	1.41386	1.22534	1.3196	1.41386
rs35803318	0.03	ACE2	0.766658	0.843324	1.14999	0.996656	1.07332	1.14999
rs2298659	0.2	TMPRSS2	0.945809	1.04039	1.41871	1.22955	1.32413	1.41871
rs3787950	0.2	TMPRSS2	0.967262	1.06399	1.45089	1.25744	1.35417	1.45089
rs4343	0.4	ACE	0.908464	0.99931	1.3627	1.181	1.27185	1.3627
rs17854725	0.4	TMPRSS2	1.27307	1.40037	1.9096	1.65499	1.78229	1.9096
rs6226	0.7	FURIN	1.14699	1.26169	1.72049	1.49109	1.60579	1.72049
rs4646115	0.004	GS1-594A7.3	0.766658	0.843324	1.14999	0.996656	1.07332	1.14999
rs61299115	0.009	TMPRSS2	0.734495	0.807945	1.10174	0.954844	1.02829	1.10174
rs4303794	0.01	TMPRSS2	0.87559	0.963149	1.31339	1.13827	1.22583	1.31339
rs4646114	0.02	ACE2, GS1-594A7.3	1.18192	1.30012	1.77288	1.5365	1.65469	1.77288
rs12683493	0.1	ABO	0.703682	0.77405	1.05552	0.914787	0.985155	1.05552
