# Supplementary material for: Computational network analysis of host genetic risk variants of severe COVID-19
Source: Hum Genomics. 2023 Mar 2;17:17. doi: 10.1186/s40246-023-00454-y (PMC9977643; doi:10.1186/s40246-023-00454-y)
Supplement: Supplementary file 3 — Additional file 3. Enrichment analysis of the molecular functions of the 24 constructed networks. [file 40246_2023_454_MOESM3_ESM.xlsx]

## Sheet: T1 STAT of constructed networks
Statistics of constrcuted PPI networks					host systems	gene expression
Network ID	Risk variants #	Risk protien#	Host protien#	PPI #	related system	human tissues and cells
1	24	16	117	511	Immune system	Blood cells and hematopoietic system
2	7	5	37	75	Innate immune system	Liver and digestive gland
3	14	3	15	27	Renin-angiotensin and metablomic systems	Kidney and viscus
4	1	3	11	27	Vascular system	Heart and viscus tissue
5	1	1	11	13	Cardiovascular system	Cardiac muscle fiber and heart tissue
6	1	1	11	55	Ribosomal protien	Pituitary gland tumor cell
7	4	1	11	33	Metabolic system	Kidney, heart, liver and adipose
8	1	1	11	19	Hematopoietic system	Natural killer cell and blood cells
9	1	1	11	28	Metabolic system	Muscle
10	1	1	11	19	Immune system	blood and Natural killer cells
11	1	1	11	38	Central nervous system	Cerebral cortex and brain tissue
12	3	1	11	12	Endomembrane system	Ovary and testis tissue
13	7	1	8	24	Metabolic system	Esophagus tissue
14	2	2	8	11	Metabolic system	Liver
15	1	1	7	14	Innate Immune system	Low tissue specificity
16	7	1	6	13	Immune system	Lymphoid tissue in B-cells
17	1	1	5	7	Urinary and cardiovascular system	Kidney and heart tissue
18	1	1	5	6	Cardiovascular system	Heart and skeletal muscle
19	1	1	3	2	Immune system	Blood cells
20	25	1	2	1	Immune system	VCaP cell
21	2	1	2	1	Immune system	Kidney and small intestine
22	1	1	2	1	Immune system	Blood cells and hematopoietic system
23	1	1	2	1	Immune system	Blood cells and hematopoietic system
24	1	1	2	1	Immune system	Blood cells and hematopoietic system

## Sheet: T2 List of the risk protiens
Network 1	Network 2	Network 3	Network 4	Network 5	Network 6	Network 7	Network 8	Network 9	Network 10	Network 11	Network 12	Network 13	Network 14	Network 15	Network 16	Network 17	Network 18	Network 19	Network 20	Network 21	Network 22	Network 23	Network 24
ABCG1	C4BPA	ACE	NCSTN	SNTA1	MRPS21	BBS1	KLRD1	GYS2	CASR	COG6	NGF	FUT5	CYP27B1	BRF2	TRAF3	AKAP9	MAP1LC3B	XCR1	TMPRSS2	SLC6A20	HAND1	CXCR6	CCL25
ITGB2	TFPI	PRCP	HEY2	CALM1	MRPS5	LZTFL1	KIR2DL4	GYS1	GRM5	COG5	FURIN	FUT2	LRP2	BDP1	TNFRSF13B	KCNH2	RAB7B	XCL1	AR	SLC36A2	FOXP4	CXCL16	CCR9
IFIT2	CFI	RHOA	MAML1	GJA1	MRPS27	BBS2	LILRB1	AGL	AQP4	GOLGA3	ANTXR2	FUT1	LGMN	TBP	TNFRSF13C	KCNQ1	MAP1LC3A	XCL2
OAS1	PTX3	AGTR2	HES5	SCN4B	MRPS18B	BBS4	B2M	TRIM7	GNAQ	COG1	BACE1	FUT4	GC	POLR3B	TRAF2	KCNE3	FYCO1
CDK5	CFHR1	AGTR1	PSEN1	DLG1	MRPS15	BBS7	LILRB2	NHLRC1	HOMER1	COG4	ADAM17	FUT6	VDR	GTF3C3	TNFRSF17	KCNE1	RAB7A
PLD2	NFKB1	RHOC	NOTCH4	CALM3	MRPL42	TTC8	HLA-G	UGP2	HOMER2	COG2	PACS1	FUT3	CUBN	POLR3D	TNFSF13B
IL17A	CD59	SLC1A7	MAML3	SCN1B	MRPS33	BBS9	CD160	GBE1	DLG4	RAB28	COL23A1	FUT9	CYP24A1	POLR3F
IL1B	SERPINC1	MEP1A	HEY1	PKP2	MRPS6	BBS5	CD8A	PYGB	GRM1	TSNAX	ANTXR1	ABO	CYP2R1
ABCG8	C4A	AGT	RBPJ	SCN5A	MRPS11	SMO	STAC	PYGM	PRNP	COG3	MMP14
FASN	F2	MME	HES1	ANK3	MRPS7	SSTR3	KLRC1	PPP1R3C	ESR1	COG7	NOTCH1
ITGB3	C2	DPP9	FBXW7	DMD	MRPS31	MCHR1	KIR3DL1	GYG1	ENSP00000480012	COG8	FBN1
ISG20	CRP	SLC6A19
TRAF6	CD55	KNG1
CEPT1	PLG	ACE2
A2M	F5	REN
STAT2	ARMS2
SREBF1	MASP2
IL10	F10
PLD1	CD97
SNCA	NFKBIA
ISG15	CD40
OASL	F7
PLD4	RELA
IRF9	F9
IL6	CFHR3
TREM2	CFH
CASP3	EGR1
IL10RA	MASP1
IL6R	COLEC11
RNASEL	C3
ITGB1	ITGAM
IFIT1	PROS1
STAT3	EGF
IL4	C4B
DYSF	ADM
IFNAR2	CFB
IFI6	F3
APOA1
STAT1
EPT1
RSAD2
RXRA
IL12RB1
CXCL1
IFNA2
VAPA
LRP8
APP
HAMP
MAPT
NR1H2
YWHAZ
CCL2
TNF
IFNAR1
VCAM1
TMEM189
IFITM3
TRPA1
UBE2V1
RXRG
VLDLR
SORL1
RXRB
IL10RB
PLD3
IL6ST
IFNW1
ANXA2
KLK4
KLK3
FYN
S100A10
ITGA4
SOCS3
KLKB1
LRP1
APOE
ABCA1
HSPA5
JAK1
IRF1
GSK3B
IRAK1
ELANE
IFIT3
OAS2
AHNAK
IFNA1
FN1
IRF7
LPCAT4
MADCAM1
TMEM189-UBE2V1
UNC93B1
ITGB7
PXN
IFNB1
MX2
USP18
APOB
MARK2
MX1
CTSB
CD28
S100B
TYK2
TLR7
CTSL
TUBB3
MYD88
SOCS1
UBE2N
CXCL8
IFI27
LDLR
ABCG5

## Sheet: T3 Molecoler pathwys of PPIs
HSA-416476		Immune pathway (green), Metabolic pathway(Yeallow), carduvasucler pathway (blue)
Network	#term ID	term description	observed gene count	background gene count	strength	false discovery rate	matching proteins in your network (IDs)	matching proteins in your network (labels)
1	hsa05160	Hepatitis C	27	156	1.46	1.16e-50	9606.ENSP00000264657,9606.ENSP00000270139,9606.ENSP00000276927,9606.ENSP00000311032,9606.ENSP00000315768,9606.ENSP00000324806,9606.ENSP00000330341,9606.ENSP00000333657,9606.ENSP00000342278,9606.ENSP00000343204,9606.ENSP00000343957,9606.ENSP00000354394,9606.ENSP00000356530,9606.ENSP00000360869,9606.ENSP00000369554,9606.ENSP00000369581,9606.ENSP00000371471,9606.ENSP00000379287,9606.ENSP00000380073,…	STAT3,IFNAR1,IFNA1,CASP3,STAT2,GSK3B,SOCS3,MX2,OAS2,JAK1,IFNAR2,STAT1,RNASEL,IFIT1,IFNA2,IFNB1,RSAD2,YWHAZ,IRF9,IRF7,MX1,OAS1,TNF,RXRA,TYK2,TRAF6,LDLR
1	hsa05162	Measles	25	138	1.48	1.87e-44	9606.ENSP00000263341,9606.ENSP00000264657,9606.ENSP00000270139,9606.ENSP00000276927,9606.ENSP00000311032,9606.ENSP00000315768,9606.ENSP00000324806,9606.ENSP00000324890,9606.ENSP00000333657,9606.ENSP00000342278,9606.ENSP00000343204,9606.ENSP00000343957,9606.ENSP00000354394,9606.ENSP00000358997,9606.ENSP00000369554,9606.ENSP00000369581,9606.ENSP00000370034,9606.ENSP00000380073,9606.ENSP00000380697,…	IL1B,STAT3,IFNAR1,IFNA1,CASP3,STAT2,GSK3B,CD28,MX2,OAS2,JAK1,IFNAR2,STAT1,IRAK1,IFNA2,IFNB1,TLR7,IRF9,IRF7,MX1,IL6,OAS1,MYD88,TYK2,TRAF6
1	hsa05164	Influenza A	26	165	1.42	3.2e-41	9606.ENSP00000225831,9606.ENSP00000263341,9606.ENSP00000270139,9606.ENSP00000276927,9606.ENSP00000306512,9606.ENSP00000311032,9606.ENSP00000315768,9606.ENSP00000330341,9606.ENSP00000333657,9606.ENSP00000342278,9606.ENSP00000343204,9606.ENSP00000343957,9606.ENSP00000354394,9606.ENSP00000356530,9606.ENSP00000369554,9606.ENSP00000369581,9606.ENSP00000370034,9606.ENSP00000371471,9606.ENSP00000380073,…	CCL2,IL1B,IFNAR1,IFNA1,CXCL8,CASP3,STAT2,SOCS3,MX2,OAS2,JAK1,IFNAR2,STAT1,RNASEL,IFNA2,IFNB1,TLR7,RSAD2,IRF9,IRF7,MX1,IL6,OAS1,TNF,MYD88,TYK2
1	hsa04621	NOD-like receptor signaling pathway	23	174	1.34	1.47e-32	9606.ENSP00000225831,9606.ENSP00000263341,9606.ENSP00000270139,9606.ENSP00000276927,9606.ENSP00000306512,9606.ENSP00000315768,9606.ENSP00000342278,9606.ENSP00000343204,9606.ENSP00000343957,9606.ENSP00000345672,9606.ENSP00000354394,9606.ENSP00000356530,9606.ENSP00000369554,9606.ENSP00000369581,9606.ENSP00000379110,9606.ENSP00000380073,9606.ENSP00000380697,9606.ENSP00000385675,9606.ENSP00000388001,…	CCL2,IL1B,IFNAR1,IFNA1,CXCL8,STAT2,OAS2,JAK1,IFNAR2,CTSB,STAT1,RNASEL,IFNA2,IFNB1,CXCL1,IRF9,IRF7,IL6,OAS1,TNF,MYD88,TYK2,TRAF6
1	hsa04630	JAK-STAT signaling pathway	22	160	1.36	7.81e-28	9606.ENSP00000227752,9606.ENSP00000231449,9606.ENSP00000264657,9606.ENSP00000270139,9606.ENSP00000276927,9606.ENSP00000290200,9606.ENSP00000315768,9606.ENSP00000329418,9606.ENSP00000330341,9606.ENSP00000343204,9606.ENSP00000343957,9606.ENSP00000354394,9606.ENSP00000357470,9606.ENSP00000369554,9606.ENSP00000369578,9606.ENSP00000369581,9606.ENSP00000370698,9606.ENSP00000380073,9606.ENSP00000385675,…	IL10RA,IL4,STAT3,IFNAR1,IFNA1,IL10RB,STAT2,SOCS1,SOCS3,JAK1,IFNAR2,STAT1,IL6R,IFNA2,IFNW1,IFNB1,IL6ST,IRF9,IL6,IL10,TYK2,IL12RB1
1	hsa05169	Epstein-Barr virus infection	21	193	1.26	2.28e-27	9606.ENSP00000264657,9606.ENSP00000270139,9606.ENSP00000276927,9606.ENSP00000311032,9606.ENSP00000315768,9606.ENSP00000342278,9606.ENSP00000343204,9606.ENSP00000343957,9606.ENSP00000354394,9606.ENSP00000358997,9606.ENSP00000368699,9606.ENSP00000369554,9606.ENSP00000369581,9606.ENSP00000380073,9606.ENSP00000380697,9606.ENSP00000385675,9606.ENSP00000388001,9606.ENSP00000398698,9606.ENSP00000401399,…	STAT3,IFNAR1,IFNA1,CASP3,STAT2,OAS2,JAK1,IFNAR2,STAT1,IRAK1,ISG15,IFNA2,IFNB1,IRF9,IRF7,IL6,OAS1,TNF,MYD88,TYK2,TRAF6
1	hsa05165	Human papillomavirus infection	23	325	1.07	2.42e-26	9606.ENSP00000245414,9606.ENSP00000257570,9606.ENSP00000267082,9606.ENSP00000270139,9606.ENSP00000276927,9606.ENSP00000311032,9606.ENSP00000315768,9606.ENSP00000324806,9606.ENSP00000333657,9606.ENSP00000343204,9606.ENSP00000343957,9606.ENSP00000346839,9606.ENSP00000354394,9606.ENSP00000368699,9606.ENSP00000369554,9606.ENSP00000369581,9606.ENSP00000379350,9606.ENSP00000380073,9606.ENSP00000380227,…	IRF1,OASL,ITGB7,IFNAR1,IFNA1,CASP3,STAT2,GSK3B,MX2,JAK1,IFNAR2,FN1,STAT1,ISG15,IFNA2,IFNB1,ITGB1,IRF9,ITGA4,MX1,TNF,TYK2,ITGB3
1	hsa05161	Hepatitis B	18	159	1.28	3.04e-26	9606.ENSP00000264657,9606.ENSP00000270139,9606.ENSP00000276927,9606.ENSP00000306512,9606.ENSP00000311032,9606.ENSP00000315768,9606.ENSP00000343204,9606.ENSP00000354394,9606.ENSP00000358997,9606.ENSP00000369554,9606.ENSP00000369581,9606.ENSP00000379287,9606.ENSP00000380697,9606.ENSP00000385675,9606.ENSP00000398698,9606.ENSP00000401399,9606.ENSP00000431885,9606.ENSP00000433623	STAT3,IFNAR1,IFNA1,CXCL8,CASP3,STAT2,JAK1,STAT1,IRAK1,IFNA2,IFNB1,YWHAZ,IRF7,IL6,TNF,MYD88,TYK2,TRAF6
1	hsa04380	Osteoclast differentiation	16	122	1.34	1.44e-21	9606.ENSP00000263341,9606.ENSP00000270139,9606.ENSP00000315768,9606.ENSP00000329418,9606.ENSP00000330341,9606.ENSP00000343204,9606.ENSP00000343957,9606.ENSP00000346671,9606.ENSP00000354394,9606.ENSP00000362205,9606.ENSP00000369581,9606.ENSP00000380073,9606.ENSP00000398698,9606.ENSP00000431885,9606.ENSP00000433623,9606.ENSP00000452786	IL1B,IFNAR1,STAT2,SOCS1,SOCS3,JAK1,IFNAR2,FYN,STAT1,TREM2,IFNB1,IRF9,TNF,TYK2,TRAF6,ITGB3
1	hsa04620	Toll-like receptor signaling pathway	15	101	1.4	5.26e-21	9606.ENSP00000263341,9606.ENSP00000270139,9606.ENSP00000276927,9606.ENSP00000306512,9606.ENSP00000343957,9606.ENSP00000354394,9606.ENSP00000358997,9606.ENSP00000369554,9606.ENSP00000369581,9606.ENSP00000370034,9606.ENSP00000380697,9606.ENSP00000385675,9606.ENSP00000398698,9606.ENSP00000401399,9606.ENSP00000433623	IL1B,IFNAR1,IFNA1,CXCL8,IFNAR2,STAT1,IRAK1,IFNA2,IFNB1,TLR7,IRF7,IL6,TNF,MYD88,TRAF6
1	hsa05167	Kaposi sarcoma-associated herpesvirus infection	18	187	1.21	3.8e-19	9606.ENSP00000264657,9606.ENSP00000270139,9606.ENSP00000276927,9606.ENSP00000306512,9606.ENSP00000311032,9606.ENSP00000315768,9606.ENSP00000324806,9606.ENSP00000343204,9606.ENSP00000343957,9606.ENSP00000354394,9606.ENSP00000369554,9606.ENSP00000369581,9606.ENSP00000370698,9606.ENSP00000379110,9606.ENSP00000380073,9606.ENSP00000380697,9606.ENSP00000385675,9606.ENSP00000431885	STAT3,IFNAR1,IFNA1,CXCL8,CASP3,STAT2,GSK3B,JAK1,IFNAR2,STAT1,IFNA2,IFNB1,IL6ST,CXCL1,IRF9,IRF7,IL6,TYK2
1	hsa05145	Toxoplasmosis	15	105	1.38	3.77e-18	9606.ENSP00000227752,9606.ENSP00000264657,9606.ENSP00000290200,9606.ENSP00000311032,9606.ENSP00000329418,9606.ENSP00000343204,9606.ENSP00000354394,9606.ENSP00000358997,9606.ENSP00000379350,9606.ENSP00000398698,9606.ENSP00000401399,9606.ENSP00000412237,9606.ENSP00000431885,9606.ENSP00000433623,9606.ENSP00000454071	IL10RA,STAT3,IL10RB,CASP3,SOCS1,JAK1,STAT1,IRAK1,ITGB1,TNF,MYD88,IL10,TYK2,TRAF6,LDLR
1	hsa05200	Pathways in cancer	25	517	0.91	3.58e-16	9606.ENSP00000231449,9606.ENSP00000263088,9606.ENSP00000264657,9606.ENSP00000270139,9606.ENSP00000276927,9606.ENSP00000306512,9606.ENSP00000311032,9606.ENSP00000314151,9606.ENSP00000315768,9606.ENSP00000324806,9606.ENSP00000342793,9606.ENSP00000343204,9606.ENSP00000343957,9606.ENSP00000346839,9606.ENSP00000352900,9606.ENSP00000354394,9606.ENSP00000357470,9606.ENSP00000363817,9606.ENSP00000369554,…	IL4,PLD2,STAT3,IFNAR1,IFNA1,CXCL8,CASP3,KLK3,STAT2,GSK3B,PLD1,JAK1,IFNAR2,FN1,RXRG,STAT1,IL6R,RXRB,IFNA2,IL6ST,ITGB1,IL6,RXRA,TRAF6,IL12RB1
1	hsa04060	Cytokine-cytokine receptor interaction	20	282	1.07	5.53e-16	9606.ENSP00000225831,9606.ENSP00000227752,9606.ENSP00000231449,9606.ENSP00000263341,9606.ENSP00000270139,9606.ENSP00000276927,9606.ENSP00000290200,9606.ENSP00000306512,9606.ENSP00000343957,9606.ENSP00000344192,9606.ENSP00000357470,9606.ENSP00000369554,9606.ENSP00000369578,9606.ENSP00000369581,9606.ENSP00000370698,9606.ENSP00000379110,9606.ENSP00000385675,9606.ENSP00000398698,9606.ENSP00000412237,…	CCL2,IL10RA,IL4,IL1B,IFNAR1,IFNA1,IL10RB,CXCL8,IFNAR2,IL17A,IL6R,IFNA2,IFNW1,IFNB1,IL6ST,CXCL1,IL6,TNF,IL10,IL12RB1
1	hsa05168	Herpes simplex virus 1 infection	24	479	0.92	7.93e-16	9606.ENSP00000225831,9606.ENSP00000263341,9606.ENSP00000270139,9606.ENSP00000276927,9606.ENSP00000311032,9606.ENSP00000315768,9606.ENSP00000330341,9606.ENSP00000342278,9606.ENSP00000343204,9606.ENSP00000343957,9606.ENSP00000354394,9606.ENSP00000356530,9606.ENSP00000358997,9606.ENSP00000369554,9606.ENSP00000369581,9606.ENSP00000380073,9606.ENSP00000380697,9606.ENSP00000385675,9606.ENSP00000388001,…	CCL2,IL1B,IFNAR1,IFNA1,CASP3,STAT2,SOCS3,OAS2,JAK1,IFNAR2,STAT1,RNASEL,IRAK1,IFNA2,IFNB1,IRF9,IRF7,IL6,OAS1,TNF,MYD88,TYK2,TRAF6,ITGB3
1	hsa04659	Th17 cell differentiation	14	101	1.37	5.77e-15	9606.ENSP00000231449,9606.ENSP00000263341,9606.ENSP00000264657,9606.ENSP00000343204,9606.ENSP00000344192,9606.ENSP00000352900,9606.ENSP00000354394,9606.ENSP00000357470,9606.ENSP00000363817,9606.ENSP00000370698,9606.ENSP00000385675,9606.ENSP00000419692,9606.ENSP00000431885,9606.ENSP00000470788	IL4,IL1B,STAT3,JAK1,IL17A,RXRG,STAT1,IL6R,RXRB,IL6ST,IL6,RXRA,TYK2,IL12RB1
1	hsa05152	Tuberculosis	16	168	1.2	8.85e-15	9606.ENSP00000227752,9606.ENSP00000263341,9606.ENSP00000276927,9606.ENSP00000290200,9606.ENSP00000311032,9606.ENSP00000343204,9606.ENSP00000354394,9606.ENSP00000358997,9606.ENSP00000369554,9606.ENSP00000369581,9606.ENSP00000380948,9606.ENSP00000385675,9606.ENSP00000398698,9606.ENSP00000401399,9606.ENSP00000412237,9606.ENSP00000433623	IL10RA,IL1B,IFNA1,IL10RB,CASP3,JAK1,STAT1,IRAK1,IFNA2,IFNB1,ITGB2,IL6,TNF,MYD88,IL10,TRAF6
1	hsa05140	Leishmaniasis	12	70	1.46	8.85e-15	9606.ENSP00000231449,9606.ENSP00000263341,9606.ENSP00000343204,9606.ENSP00000354394,9606.ENSP00000358997,9606.ENSP00000379350,9606.ENSP00000380227,9606.ENSP00000380948,9606.ENSP00000398698,9606.ENSP00000401399,9606.ENSP00000412237,9606.ENSP00000433623	IL4,IL1B,JAK1,STAT1,IRAK1,ITGB1,ITGA4,ITGB2,TNF,MYD88,IL10,TRAF6
1	hsa05135	Yersinia infection	14	125	1.27	1.28e-14	9606.ENSP00000225831,9606.ENSP00000263341,9606.ENSP00000306512,9606.ENSP00000324806,9606.ENSP00000346839,9606.ENSP00000358997,9606.ENSP00000369581,9606.ENSP00000379350,9606.ENSP00000380227,9606.ENSP00000385675,9606.ENSP00000398698,9606.ENSP00000401399,9606.ENSP00000412237,9606.ENSP00000433623	CCL2,IL1B,CXCL8,GSK3B,FN1,IRAK1,IFNB1,ITGB1,ITGA4,IL6,TNF,MYD88,IL10,TRAF6
1	hsa05133	Pertussis	12	74	1.43	2.9e-14	9606.ENSP00000245414,9606.ENSP00000263341,9606.ENSP00000306512,9606.ENSP00000311032,9606.ENSP00000358997,9606.ENSP00000379350,9606.ENSP00000380948,9606.ENSP00000385675,9606.ENSP00000398698,9606.ENSP00000401399,9606.ENSP00000412237,9606.ENSP00000433623	IRF1,IL1B,CXCL8,CASP3,IRAK1,ITGB1,ITGB2,IL6,TNF,MYD88,IL10,TRAF6
1	hsa05163	Human cytomegalovirus infection	16	218	1.09	2.97e-14	9606.ENSP00000225831,9606.ENSP00000227752,9606.ENSP00000263341,9606.ENSP00000264657,9606.ENSP00000276927,9606.ENSP00000290200,9606.ENSP00000306512,9606.ENSP00000311032,9606.ENSP00000324806,9606.ENSP00000343204,9606.ENSP00000357470,9606.ENSP00000369554,9606.ENSP00000369581,9606.ENSP00000385675,9606.ENSP00000398698,9606.ENSP00000452786	CCL2,IL10RA,IL1B,STAT3,IFNA1,IL10RB,CXCL8,CASP3,GSK3B,JAK1,IL6R,IFNA2,IFNB1,IL6,TNF,ITGB3
1	hsa05144	Malaria	10	46	1.56	4.79e-14	9606.ENSP00000225831,9606.ENSP00000243077,9606.ENSP00000263341,9606.ENSP00000294728,9606.ENSP00000306512,9606.ENSP00000380948,9606.ENSP00000385675,9606.ENSP00000398698,9606.ENSP00000401399,9606.ENSP00000412237	CCL2,LRP1,IL1B,VCAM1,CXCL8,ITGB2,IL6,TNF,MYD88,IL10
1	hsa04217	Necroptosis	13	149	1.16	1.4e-13	9606.ENSP00000263341,9606.ENSP00000264657,9606.ENSP00000270139,9606.ENSP00000276927,9606.ENSP00000315768,9606.ENSP00000343204,9606.ENSP00000343957,9606.ENSP00000354394,9606.ENSP00000369554,9606.ENSP00000369581,9606.ENSP00000380073,9606.ENSP00000398698,9606.ENSP00000431885	IL1B,STAT3,IFNAR1,IFNA1,STAT2,JAK1,IFNAR2,STAT1,IFNA2,IFNB1,IRF9,TNF,TYK2
1	hsa04657	IL-17 signaling pathway	11	92	1.3	1.67e-13	9606.ENSP00000225831,9606.ENSP00000231449,9606.ENSP00000263341,9606.ENSP00000306512,9606.ENSP00000311032,9606.ENSP00000324806,9606.ENSP00000344192,9606.ENSP00000379110,9606.ENSP00000385675,9606.ENSP00000398698,9606.ENSP00000433623	CCL2,IL4,IL1B,CXCL8,CASP3,GSK3B,IL17A,CXCL1,IL6,TNF,TRAF6
1	hsa00565	Ether lipid metabolism	9	47	1.51	3.08e-13	9606.ENSP00000260585,9606.ENSP00000263088,9606.ENSP00000317300,9606.ENSP00000342793,9606.ENSP00000344166,9606.ENSP00000360715,9606.ENSP00000376372,9606.ENSP00000387050,9606.ENSP00000441980	EPT1,PLD2,LPCAT4,PLD1,TMEM189-UBE2V1,TMEM189,PLD4,PLD3,CEPT1
1	hsa04151	PI3K-Akt signaling pathway	17	350	0.91	1.19e-12	9606.ENSP00000231449,9606.ENSP00000267082,9606.ENSP00000270139,9606.ENSP00000276927,9606.ENSP00000324806,9606.ENSP00000343204,9606.ENSP00000343957,9606.ENSP00000346839,9606.ENSP00000357470,9606.ENSP00000369554,9606.ENSP00000369581,9606.ENSP00000379287,9606.ENSP00000379350,9606.ENSP00000380227,9606.ENSP00000385675,9606.ENSP00000419692,9606.ENSP00000452786	IL4,ITGB7,IFNAR1,IFNA1,GSK3B,JAK1,IFNAR2,FN1,IL6R,IFNA2,IFNB1,YWHAZ,ITGB1,ITGA4,IL6,RXRA,ITGB3
1	hsa05323	Rheumatoid arthritis	10	85	1.29	1.72e-12	9606.ENSP00000225831,9606.ENSP00000263341,9606.ENSP00000306512,9606.ENSP00000324890,9606.ENSP00000344192,9606.ENSP00000345344,9606.ENSP00000379110,9606.ENSP00000380948,9606.ENSP00000385675,9606.ENSP00000398698	CCL2,IL1B,CXCL8,CD28,IL17A,CTSL,CXCL1,ITGB2,IL6,TNF
1	hsa05321	Inflammatory bowel disease	9	60	1.4	1.94e-12	9606.ENSP00000231449,9606.ENSP00000263341,9606.ENSP00000264657,9606.ENSP00000344192,9606.ENSP00000354394,9606.ENSP00000385675,9606.ENSP00000398698,9606.ENSP00000412237,9606.ENSP00000470788	IL4,IL1B,STAT3,IL17A,STAT1,IL6,TNF,IL10,IL12RB1
1	hsa04061	Viral protein interaction with cytokine and cytokine receptor	10	96	1.24	1.06e-11	9606.ENSP00000225831,9606.ENSP00000227752,9606.ENSP00000290200,9606.ENSP00000306512,9606.ENSP00000357470,9606.ENSP00000370698,9606.ENSP00000379110,9606.ENSP00000385675,9606.ENSP00000398698,9606.ENSP00000412237	CCL2,IL10RA,IL10RB,CXCL8,IL6R,IL6ST,CXCL1,IL6,TNF,IL10
1	hsa04933	AGE-RAGE signaling pathway in diabetic complications	10	98	1.23	1.61e-11	9606.ENSP00000225831,9606.ENSP00000263341,9606.ENSP00000264657,9606.ENSP00000294728,9606.ENSP00000306512,9606.ENSP00000311032,9606.ENSP00000346839,9606.ENSP00000354394,9606.ENSP00000385675,9606.ENSP00000398698	CCL2,IL1B,STAT3,VCAM1,CXCL8,CASP3,FN1,STAT1,IL6,TNF
1	hsa04622	RIG-I-like receptor signaling pathway	9	70	1.33	1.62e-11	9606.ENSP00000276927,9606.ENSP00000306512,9606.ENSP00000368699,9606.ENSP00000369554,9606.ENSP00000369578,9606.ENSP00000369581,9606.ENSP00000380697,9606.ENSP00000398698,9606.ENSP00000433623	IFNA1,CXCL8,ISG15,IFNA2,IFNW1,IFNB1,IRF7,TNF,TRAF6
1	hsa05142	Chagas disease	10	99	1.23	1.9e-11	9606.ENSP00000225831,9606.ENSP00000263341,9606.ENSP00000306512,9606.ENSP00000358997,9606.ENSP00000369581,9606.ENSP00000385675,9606.ENSP00000398698,9606.ENSP00000401399,9606.ENSP00000412237,9606.ENSP00000433623	CCL2,IL1B,CXCL8,IRAK1,IFNB1,IL6,TNF,MYD88,IL10,TRAF6
1	hsa04979	Cholesterol metabolism	8	48	1.45	6e-11	9606.ENSP00000233242,9606.ENSP00000236850,9606.ENSP00000243077,9606.ENSP00000252486,9606.ENSP00000260645,9606.ENSP00000272286,9606.ENSP00000363868,9606.ENSP00000454071	APOB,APOA1,LRP1,APOE,ABCG5,ABCG8,ABCA1,LDLR
1	hsa04668	TNF signaling pathway	10	112	1.17	2.11e-10	9606.ENSP00000225831,9606.ENSP00000245414,9606.ENSP00000263341,9606.ENSP00000294728,9606.ENSP00000311032,9606.ENSP00000330341,9606.ENSP00000369581,9606.ENSP00000379110,9606.ENSP00000385675,9606.ENSP00000398698	CCL2,IRF1,IL1B,VCAM1,CASP3,SOCS3,IFNB1,CXCL1,IL6,TNF
1	hsa05134	Legionellosis	8	55	1.39	2.3e-10	9606.ENSP00000263341,9606.ENSP00000306512,9606.ENSP00000311032,9606.ENSP00000379110,9606.ENSP00000380948,9606.ENSP00000385675,9606.ENSP00000398698,9606.ENSP00000401399	IL1B,CXCL8,CASP3,CXCL1,ITGB2,IL6,TNF,MYD88
1	hsa05143	African trypanosomiasis	7	36	1.51	3.58e-10	9606.ENSP00000236850,9606.ENSP00000263341,9606.ENSP00000294728,9606.ENSP00000385675,9606.ENSP00000398698,9606.ENSP00000401399,9606.ENSP00000412237	APOA1,IL1B,VCAM1,IL6,TNF,MYD88,IL10
1	hsa04672	Intestinal immune network for IgA production	7	43	1.43	4.03e-10	9606.ENSP00000215637,9606.ENSP00000231449,9606.ENSP00000267082,9606.ENSP00000324890,9606.ENSP00000380227,9606.ENSP00000385675,9606.ENSP00000412237	MADCAM1,IL4,ITGB7,CD28,ITGA4,IL6,IL10
1	hsa05146	Amoebiasis	9	100	1.18	5.46e-10	9606.ENSP00000263341,9606.ENSP00000306512,9606.ENSP00000311032,9606.ENSP00000346839,9606.ENSP00000379110,9606.ENSP00000380948,9606.ENSP00000385675,9606.ENSP00000398698,9606.ENSP00000412237	IL1B,CXCL8,CASP3,FN1,CXCL1,ITGB2,IL6,TNF,IL10
1	hsa05130	Pathogenic Escherichia coli infection	11	187	0.99	6.26e-10	9606.ENSP00000263341,9606.ENSP00000306512,9606.ENSP00000311032,9606.ENSP00000320295,9606.ENSP00000346671,9606.ENSP00000358997,9606.ENSP00000379350,9606.ENSP00000385675,9606.ENSP00000398698,9606.ENSP00000401399,9606.ENSP00000433623	IL1B,CXCL8,CASP3,TUBB3,FYN,IRAK1,ITGB1,IL6,TNF,MYD88,TRAF6
1	hsa04932	Non-alcoholic fatty liver disease	10	148	1.05	7.81e-10	9606.ENSP00000263341,9606.ENSP00000306512,9606.ENSP00000311032,9606.ENSP00000324806,9606.ENSP00000330341,9606.ENSP00000348069,9606.ENSP00000357470,9606.ENSP00000385675,9606.ENSP00000398698,9606.ENSP00000419692	IL1B,CXCL8,CASP3,GSK3B,SOCS3,SREBF1,IL6R,IL6,TNF,RXRA
1	hsa04650	Natural killer cell mediated cytotoxicity	9	121	1.09	2.16e-09	9606.ENSP00000270139,9606.ENSP00000276927,9606.ENSP00000311032,9606.ENSP00000343957,9606.ENSP00000346671,9606.ENSP00000369554,9606.ENSP00000369581,9606.ENSP00000380948,9606.ENSP00000398698	IFNAR1,IFNA1,CASP3,IFNAR2,FYN,IFNA2,IFNB1,ITGB2,TNF
1	hsa05132	Salmonella infection	11	209	0.94	2.16e-09	9606.ENSP00000263341,9606.ENSP00000306512,9606.ENSP00000311032,9606.ENSP00000346032,9606.ENSP00000357801,9606.ENSP00000358997,9606.ENSP00000367263,9606.ENSP00000385675,9606.ENSP00000398698,9606.ENSP00000401399,9606.ENSP00000433623	IL1B,CXCL8,CASP3,ANXA2,S100A10,IRAK1,AHNAK,IL6,TNF,MYD88,TRAF6
1	hsa04064	NF-kappa B signaling pathway	8	101	1.12	2.16e-09	9606.ENSP00000263341,9606.ENSP00000294728,9606.ENSP00000306512,9606.ENSP00000358997,9606.ENSP00000379110,9606.ENSP00000398698,9606.ENSP00000401399,9606.ENSP00000433623	IL1B,VCAM1,CXCL8,IRAK1,CXCL1,TNF,MYD88,TRAF6
1	hsa04625	C-type lectin receptor signaling pathway	8	102	1.12	3.07e-09	9606.ENSP00000245414,9606.ENSP00000263341,9606.ENSP00000315768,9606.ENSP00000354394,9606.ENSP00000380073,9606.ENSP00000385675,9606.ENSP00000398698,9606.ENSP00000412237	IRF1,IL1B,STAT2,STAT1,IRF9,IL6,TNF,IL10
1	hsa04640	Hematopoietic cell lineage	7	91	1.11	3.42e-09	9606.ENSP00000231449,9606.ENSP00000263341,9606.ENSP00000357470,9606.ENSP00000380227,9606.ENSP00000385675,9606.ENSP00000398698,9606.ENSP00000452786	IL4,IL1B,IL6R,ITGA4,IL6,TNF,ITGB3
1	hsa05010	Alzheimer disease	12	355	0.75	8.52e-09	9606.ENSP00000243077,9606.ENSP00000252486,9606.ENSP00000263341,9606.ENSP00000284981,9606.ENSP00000311032,9606.ENSP00000320295,9606.ENSP00000324806,9606.ENSP00000338345,9606.ENSP00000340820,9606.ENSP00000385675,9606.ENSP00000398698,9606.ENSP00000419782	LRP1,APOE,IL1B,APP,CASP3,TUBB3,GSK3B,SNCA,MAPT,IL6,TNF,CDK5
1	hsa05222	Small cell lung cancer	7	92	1.1	9.92e-09	9606.ENSP00000311032,9606.ENSP00000346839,9606.ENSP00000352900,9606.ENSP00000363817,9606.ENSP00000379350,9606.ENSP00000419692,9606.ENSP00000433623	CASP3,FN1,RXRG,RXRB,ITGB1,RXRA,TRAF6
1	hsa00564	Glycerophospholipid metabolism	7	97	1.08	1.05e-08	9606.ENSP00000260585,9606.ENSP00000263088,9606.ENSP00000317300,9606.ENSP00000342793,9606.ENSP00000376372,9606.ENSP00000387050,9606.ENSP00000441980	EPT1,PLD2,LPCAT4,PLD1,PLD4,PLD3,CEPT1
1	hsa04623	Cytosolic DNA-sensing pathway	6	62	1.21	1.05e-08	9606.ENSP00000263341,9606.ENSP00000276927,9606.ENSP00000369554,9606.ENSP00000369581,9606.ENSP00000380697,9606.ENSP00000385675	IL1B,IFNA1,IFNA2,IFNB1,IRF7,IL6
1	hsa04931	Insulin resistance	7	107	1.04	1.39e-08	9606.ENSP00000253727,9606.ENSP00000264657,9606.ENSP00000324806,9606.ENSP00000330341,9606.ENSP00000348069,9606.ENSP00000385675,9606.ENSP00000398698	NR1H2,STAT3,GSK3B,SOCS3,SREBF1,IL6,TNF
1	hsa04917	Prolactin signaling pathway	6	69	1.16	2.51e-08	9606.ENSP00000245414,9606.ENSP00000264657,9606.ENSP00000324806,9606.ENSP00000329418,9606.ENSP00000330341,9606.ENSP00000354394	IRF1,STAT3,GSK3B,SOCS1,SOCS3,STAT1
1	hsa04920	Adipocytokine signaling pathway	6	69	1.16	2.91e-08	9606.ENSP00000264657,9606.ENSP00000330341,9606.ENSP00000352900,9606.ENSP00000363817,9606.ENSP00000398698,9606.ENSP00000419692	STAT3,SOCS3,RXRG,RXRB,TNF,RXRA
1	hsa04975	Fat digestion and absorption	5	41	1.31	3.46e-08	9606.ENSP00000233242,9606.ENSP00000236850,9606.ENSP00000260645,9606.ENSP00000272286,9606.ENSP00000363868	APOB,APOA1,ABCG5,ABCG8,ABCA1
1	hsa05131	Shigellosis	9	218	0.84	5.51e-08	9606.ENSP00000263341,9606.ENSP00000306512,9606.ENSP00000316176,9606.ENSP00000324806,9606.ENSP00000369581,9606.ENSP00000379350,9606.ENSP00000398698,9606.ENSP00000401399,9606.ENSP00000433623	IL1B,CXCL8,UBE2N,GSK3B,IFNB1,ITGB1,TNF,MYD88,TRAF6
1	hsa05320	Autoimmune thyroid disease	5	48	1.24	6.84e-08	9606.ENSP00000231449,9606.ENSP00000276927,9606.ENSP00000324890,9606.ENSP00000369554,9606.ENSP00000412237	IL4,IFNA1,CD28,IFNA2,IL10
1	hsa05235	PD-L1 expression and PD-1 checkpoint pathway in cancer	6	88	1.06	1.14e-07	9606.ENSP00000264657,9606.ENSP00000324890,9606.ENSP00000343204,9606.ENSP00000354394,9606.ENSP00000401399,9606.ENSP00000433623	STAT3,CD28,JAK1,STAT1,MYD88,TRAF6
1	hsa05410	Hypertrophic cardiomyopathy	6	89	1.05	1.6e-07	9606.ENSP00000267082,9606.ENSP00000379350,9606.ENSP00000380227,9606.ENSP00000385675,9606.ENSP00000398698,9606.ENSP00000452786	ITGB7,ITGB1,ITGA4,IL6,TNF,ITGB3
1	hsa04514	Cell adhesion molecules	7	137	0.93	1.6e-07	9606.ENSP00000215637,9606.ENSP00000267082,9606.ENSP00000294728,9606.ENSP00000324890,9606.ENSP00000379350,9606.ENSP00000380227,9606.ENSP00000380948	MADCAM1,ITGB7,VCAM1,CD28,ITGB1,ITGA4,ITGB2
1	hsa05170	Human immunodeficiency virus 1 infection	8	204	0.82	1.78e-07	9606.ENSP00000276927,9606.ENSP00000311032,9606.ENSP00000358997,9606.ENSP00000369554,9606.ENSP00000369581,9606.ENSP00000398698,9606.ENSP00000401399,9606.ENSP00000433623	IFNA1,CASP3,IRAK1,IFNA2,IFNB1,TNF,MYD88,TRAF6
1	hsa04660	T cell receptor signaling pathway	6	101	1	2.16e-07	9606.ENSP00000231449,9606.ENSP00000324806,9606.ENSP00000324890,9606.ENSP00000346671,9606.ENSP00000398698,9606.ENSP00000412237	IL4,GSK3B,CD28,FYN,TNF,IL10
1	hsa05330	Allograft rejection	4	34	1.29	2.39e-07	9606.ENSP00000231449,9606.ENSP00000324890,9606.ENSP00000398698,9606.ENSP00000412237	IL4,CD28,TNF,IL10
1	hsa05202	Transcriptional misregulation in cancer	7	171	0.84	2.9e-07	9606.ENSP00000267082,9606.ENSP00000306512,9606.ENSP00000352900,9606.ENSP00000363817,9606.ENSP00000385675,9606.ENSP00000419692,9606.ENSP00000466090	ITGB7,CXCL8,RXRG,RXRB,IL6,RXRA,ELANE
1	hsa05332	Graft-versus-host disease	4	36	1.27	2.99e-07	9606.ENSP00000263341,9606.ENSP00000324890,9606.ENSP00000385675,9606.ENSP00000398698	IL1B,CD28,IL6,TNF
1	hsa04919	Thyroid hormone signaling pathway	6	119	0.93	3.57e-07	9606.ENSP00000324806,9606.ENSP00000352900,9606.ENSP00000354394,9606.ENSP00000363817,9606.ENSP00000419692,9606.ENSP00000452786	GSK3B,RXRG,STAT1,RXRB,RXRA,ITGB3
1	hsa05212	Pancreatic cancer	5	73	1.06	6.27e-07	9606.ENSP00000263088,9606.ENSP00000264657,9606.ENSP00000342793,9606.ENSP00000343204,9606.ENSP00000354394	PLD2,STAT3,PLD1,JAK1,STAT1
1	hsa01521	EGFR tyrosine kinase inhibitor resistance	5	78	1.03	6.6e-07	9606.ENSP00000264657,9606.ENSP00000324806,9606.ENSP00000343204,9606.ENSP00000357470,9606.ENSP00000385675	STAT3,GSK3B,JAK1,IL6R,IL6
1	hsa05203	Viral carcinogenesis	7	182	0.81	6.68e-07	9606.ENSP00000264657,9606.ENSP00000311032,9606.ENSP00000343204,9606.ENSP00000370698,9606.ENSP00000379287,9606.ENSP00000380073,9606.ENSP00000380697	STAT3,CASP3,JAK1,IL6ST,YWHAZ,IRF9,IRF7
1	hsa04062	Chemokine signaling pathway	7	186	0.8	6.68e-07	9606.ENSP00000225831,9606.ENSP00000264657,9606.ENSP00000306512,9606.ENSP00000315768,9606.ENSP00000324806,9606.ENSP00000354394,9606.ENSP00000379110	CCL2,STAT3,CXCL8,STAT2,GSK3B,STAT1,CXCL1
1	hsa05418	Fluid shear stress and atherosclerosis	6	130	0.89	9.46e-07	9606.ENSP00000225831,9606.ENSP00000263341,9606.ENSP00000294728,9606.ENSP00000345344,9606.ENSP00000398698,9606.ENSP00000452786	CCL2,IL1B,VCAM1,CTSL,TNF,ITGB3
1	hsa02010	ABC transporters	4	45	1.17	9.46e-07	9606.ENSP00000260645,9606.ENSP00000272286,9606.ENSP00000354995,9606.ENSP00000363868	ABCG5,ABCG8,ABCG1,ABCA1
1	hsa04510	Focal adhesion	7	198	0.77	1.14e-06	9606.ENSP00000267082,9606.ENSP00000324806,9606.ENSP00000346671,9606.ENSP00000346839,9606.ENSP00000379350,9606.ENSP00000380227,9606.ENSP00000452786	ITGB7,GSK3B,FYN,FN1,ITGB1,ITGA4,ITGB3
1	hsa04512	ECM-receptor interaction	5	88	0.98	1.28e-06	9606.ENSP00000267082,9606.ENSP00000346839,9606.ENSP00000379350,9606.ENSP00000380227,9606.ENSP00000452786	ITGB7,FN1,ITGB1,ITGA4,ITGB3
1	hsa04658	Th1 and Th2 cell differentiation	5	87	0.98	1.44e-06	9606.ENSP00000231449,9606.ENSP00000343204,9606.ENSP00000354394,9606.ENSP00000431885,9606.ENSP00000470788	IL4,JAK1,STAT1,TYK2,IL12RB1
1	hsa05020	Prion disease	8	265	0.7	1.57e-06	9606.ENSP00000263341,9606.ENSP00000311032,9606.ENSP00000320295,9606.ENSP00000324173,9606.ENSP00000324806,9606.ENSP00000346671,9606.ENSP00000385675,9606.ENSP00000398698	IL1B,CASP3,TUBB3,HSPA5,GSK3B,FYN,IL6,TNF
1	hsa05205	Proteoglycans in cancer	7	196	0.78	1.65e-06	9606.ENSP00000264657,9606.ENSP00000311032,9606.ENSP00000345344,9606.ENSP00000346839,9606.ENSP00000379350,9606.ENSP00000398698,9606.ENSP00000452786	STAT3,CASP3,CTSL,FN1,ITGB1,TNF,ITGB3
1	hsa05414	Dilated cardiomyopathy	5	95	0.94	1.66e-06	9606.ENSP00000267082,9606.ENSP00000379350,9606.ENSP00000380227,9606.ENSP00000398698,9606.ENSP00000452786	ITGB7,ITGB1,ITGA4,TNF,ITGB3
1	hsa05416	Viral myocarditis	4	55	1.09	2.09e-06	9606.ENSP00000311032,9606.ENSP00000324890,9606.ENSP00000346671,9606.ENSP00000380948	CASP3,CD28,FYN,ITGB2
1	hsa04928	Parathyroid hormone synthesis, secretion and action	5	103	0.91	2.2e-06	9606.ENSP00000263088,9606.ENSP00000342793,9606.ENSP00000352900,9606.ENSP00000363817,9606.ENSP00000419692	PLD2,PLD1,RXRG,RXRB,RXRA
1	hsa04612	Antigen processing and presentation	4	63	1.03	2.22e-06	9606.ENSP00000324173,9606.ENSP00000345344,9606.ENSP00000345672,9606.ENSP00000398698	HSPA5,CTSL,CTSB,TNF
1	hsa05310	Asthma	3	27	1.27	2.31e-06	9606.ENSP00000231449,9606.ENSP00000398698,9606.ENSP00000412237	IL4,TNF,IL10
1	hsa04935	Growth hormone synthesis, secretion and action	5	118	0.85	4.44e-06	9606.ENSP00000264657,9606.ENSP00000324806,9606.ENSP00000329418,9606.ENSP00000330341,9606.ENSP00000354394	STAT3,GSK3B,SOCS1,SOCS3,STAT1
1	hsa05223	Non-small cell lung cancer	4	68	0.99	4.85e-06	9606.ENSP00000264657,9606.ENSP00000352900,9606.ENSP00000363817,9606.ENSP00000419692	STAT3,RXRG,RXRB,RXRA
1	hsa00440	Phosphonate and phosphinate metabolism	2	6	1.75	5.57e-06	9606.ENSP00000260585,9606.ENSP00000441980	EPT1,CEPT1
1	hsa01523	Antifolate resistance	3	31	1.21	5.75e-06	9606.ENSP00000263341,9606.ENSP00000385675,9606.ENSP00000398698	IL1B,IL6,TNF
1	hsa03320	PPAR signaling pathway	4	75	0.95	8.32e-06	9606.ENSP00000236850,9606.ENSP00000352900,9606.ENSP00000363817,9606.ENSP00000419692	APOA1,RXRG,RXRB,RXRA
1	hsa05412	Arrhythmogenic right ventricular cardiomyopathy	4	76	0.94	1.11e-05	9606.ENSP00000267082,9606.ENSP00000379350,9606.ENSP00000380227,9606.ENSP00000452786	ITGB7,ITGB1,ITGA4,ITGB3
1	hsa04910	Insulin signaling pathway	5	133	0.8	1.17e-05	9606.ENSP00000304592,9606.ENSP00000324806,9606.ENSP00000329418,9606.ENSP00000330341,9606.ENSP00000348069	FASN,GSK3B,SOCS1,SOCS3,SREBF1
1	hsa05216	Thyroid cancer	3	36	1.14	1.45e-05	9606.ENSP00000352900,9606.ENSP00000363817,9606.ENSP00000419692	RXRG,RXRB,RXRA
1	hsa04810	Regulation of actin cytoskeleton	6	209	0.68	1.45e-05	9606.ENSP00000267082,9606.ENSP00000346839,9606.ENSP00000379350,9606.ENSP00000380227,9606.ENSP00000380948,9606.ENSP00000452786	ITGB7,FN1,ITGB1,ITGA4,ITGB2,ITGB3
1	hsa04145	Phagosome	5	142	0.77	1.48e-05	9606.ENSP00000320295,9606.ENSP00000345344,9606.ENSP00000379350,9606.ENSP00000380948,9606.ENSP00000452786	TUBB3,CTSL,ITGB1,ITGB2,ITGB3
1	hsa04010	MAPK signaling pathway	7	288	0.61	2.02e-05	9606.ENSP00000263341,9606.ENSP00000311032,9606.ENSP00000340820,9606.ENSP00000358997,9606.ENSP00000398698,9606.ENSP00000401399,9606.ENSP00000433623	IL1B,CASP3,MAPT,IRAK1,TNF,MYD88,TRAF6
1	hsa04940	Type I diabetes mellitus	3	39	1.11	2.15e-05	9606.ENSP00000263341,9606.ENSP00000324890,9606.ENSP00000398698	IL1B,CD28,TNF
1	hsa04976	Bile secretion	4	89	0.88	2.16e-05	9606.ENSP00000260645,9606.ENSP00000272286,9606.ENSP00000419692,9606.ENSP00000454071	ABCG5,ABCG8,RXRA,LDLR
1	hsa05322	Systemic lupus erythematosus	4	93	0.86	2.39e-05	9606.ENSP00000324890,9606.ENSP00000398698,9606.ENSP00000412237,9606.ENSP00000466090	CD28,TNF,IL10,ELANE
1	hsa04930	Type II diabetes mellitus	3	46	1.04	2.39e-05	9606.ENSP00000329418,9606.ENSP00000330341,9606.ENSP00000398698	SOCS1,SOCS3,TNF
1	hsa04670	Leukocyte transendothelial migration	4	109	0.79	3.17e-05	9606.ENSP00000294728,9606.ENSP00000379350,9606.ENSP00000380227,9606.ENSP00000380948	VCAM1,ITGB1,ITGA4,ITGB2
1	hsa04071	Sphingolipid signaling pathway	4	116	0.76	3.17e-05	9606.ENSP00000263088,9606.ENSP00000342793,9606.ENSP00000346671,9606.ENSP00000398698	PLD2,PLD1,FYN,TNF
1	hsa04664	Fc epsilon RI signaling pathway	3	66	0.88	3.58e-05	9606.ENSP00000231449,9606.ENSP00000346671,9606.ENSP00000398698	IL4,FYN,TNF
1	hsa05120	Epithelial cell signaling in Helicobacter pylori infection	3	67	0.87	3.68e-05	9606.ENSP00000306512,9606.ENSP00000311032,9606.ENSP00000379110	CXCL8,CASP3,CXCL1
1	hsa04210	Apoptosis	4	132	0.7	3.68e-05	9606.ENSP00000311032,9606.ENSP00000345344,9606.ENSP00000345672,9606.ENSP00000398698	CASP3,CTSL,CTSB,TNF
1	hsa04120	Ubiquitin mediated proteolysis	4	135	0.7	4.47e-05	9606.ENSP00000316176,9606.ENSP00000329418,9606.ENSP00000330341,9606.ENSP00000433623	UBE2N,SOCS1,SOCS3,TRAF6
1	hsa04977	Vitamin digestion and absorption	2	24	1.14	4.87e-05	9606.ENSP00000233242,9606.ENSP00000236850	APOB,APOA1
1	hsa04550	Signaling pathways regulating pluripotency of stem cells	4	140	0.68	5.12e-05	9606.ENSP00000264657,9606.ENSP00000324806,9606.ENSP00000343204,9606.ENSP00000370698	STAT3,GSK3B,JAK1,IL6ST
1	hsa05226	Gastric cancer	4	144	0.67	5.38e-05	9606.ENSP00000324806,9606.ENSP00000352900,9606.ENSP00000363817,9606.ENSP00000419692	GSK3B,RXRG,RXRB,RXRA
1	hsa04072	Phospholipase D signaling pathway	4	147	0.66	7.39e-05	9606.ENSP00000263088,9606.ENSP00000306512,9606.ENSP00000342793,9606.ENSP00000346671	PLD2,CXCL8,PLD1,FYN
1	hsa04610	Complement and coagulation cascades	3	82	0.79	9.31e-05	9606.ENSP00000264690,9606.ENSP00000323929,9606.ENSP00000380948	KLKB1,A2M,ITGB2
1	hsa05012	Parkinson disease	5	240	0.54	9.33e-05	9606.ENSP00000311032,9606.ENSP00000320295,9606.ENSP00000324173,9606.ENSP00000338345,9606.ENSP00000340820	CASP3,TUBB3,HSPA5,SNCA,MAPT
1	HSA-1280215	Cytokine Signaling in Immune system	60	681	1.17	9.51e-05	9606.ENSP00000215794,9606.ENSP00000225831,9606.ENSP00000227752,9606.ENSP00000231449,9606.ENSP00000245414,9606.ENSP00000257570,9606.ENSP00000263341,9606.ENSP00000264657,9606.ENSP00000270139,9606.ENSP00000276927,9606.ENSP00000284981,9606.ENSP00000290200,9606.ENSP00000291700,9606.ENSP00000294728,9606.ENSP00000306512,9606.ENSP00000306565,9606.ENSP00000311032,9606.ENSP00000315768,9606.ENSP00000316176,…	USP18,CCL2,IL10RA,IL4,IRF1,OASL,IL1B,STAT3,IFNAR1,IFNA1,APP,IL10RB,S100B,VCAM1,CXCL8,ISG20,CASP3,STAT2,UBE2N,SOCS1,SOCS3,MX2,UBE2V1,OAS2,IFI6,JAK1,IFNAR2,IL17A,ANXA2,FYN,FN1,STAT1,RNASEL,IL6R,IRAK1,IFIT1,IFIT3,IFIT2,ISG15,IFNA2,IFNB1,IL6ST,RSAD2,CXCL1,YWHAZ,ITGB1,IRF9,IRF7,ITGB2,MX1,IFITM3,IL6,OAS1,TNF,MYD88,IL10,TYK2,TRAF6,IL12RB1,IFI27
1	HSA-168256	Immune System	77	1956	0.82	0.00011	9606.ENSP00000215637,9606.ENSP00000215794,9606.ENSP00000225831,9606.ENSP00000227471,9606.ENSP00000227752,9606.ENSP00000231449,9606.ENSP00000233242,9606.ENSP00000245414,9606.ENSP00000257570,9606.ENSP00000263088,9606.ENSP00000263341,9606.ENSP00000264657,9606.ENSP00000267082,9606.ENSP00000270139,9606.ENSP00000276927,9606.ENSP00000284981,9606.ENSP00000290200,9606.ENSP00000291700,9606.ENSP00000294728,…	MADCAM1,USP18,CCL2,UNC93B1,IL10RA,IL4,APOB,IRF1,OASL,PLD2,IL1B,STAT3,ITGB7,IFNAR1,IFNA1,APP,IL10RB,S100B,VCAM1,CXCL8,ISG20,CASP3,STAT2,UBE2N,TUBB3,HSPA5,CD28,SOCS1,SOCS3,MX2,UBE2V1,OAS2,IFI6,PLD1,JAK1,IFNAR2,IL17A,CTSL,CTSB,ANXA2,FYN,FN1,STAT1,RNASEL,IL6R,IRAK1,IFIT1,IFIT3,IFIT2,TREM2,ISG15,IFNA2,IFNB1,TLR7,IL6ST,RSAD2,PLD4,CXCL1,YWHAZ,ITGB1,IRF9,ITGA4,IRF7,ITGB2,MX1,IFITM3,IL6,PLD3,OAS1,TNF,MYD8…
1	HSA-909733	Interferon alpha/beta signaling	30	69	1.86	0.00011	9606.ENSP00000215794,9606.ENSP00000245414,9606.ENSP00000257570,9606.ENSP00000270139,9606.ENSP00000276927,9606.ENSP00000306565,9606.ENSP00000315768,9606.ENSP00000329418,9606.ENSP00000330341,9606.ENSP00000333657,9606.ENSP00000342278,9606.ENSP00000342513,9606.ENSP00000343204,9606.ENSP00000343957,9606.ENSP00000354394,9606.ENSP00000356530,9606.ENSP00000360869,9606.ENSP00000360883,9606.ENSP00000360891,…	USP18,IRF1,OASL,IFNAR1,IFNA1,ISG20,STAT2,SOCS1,SOCS3,MX2,OAS2,IFI6,JAK1,IFNAR2,STAT1,RNASEL,IFIT1,IFIT3,IFIT2,ISG15,IFNA2,IFNB1,RSAD2,IRF9,IRF7,MX1,IFITM3,OAS1,TYK2,IFI27
1	HSA-913531	Interferon Signaling	32	196	1.44	0.00011	9606.ENSP00000215794,9606.ENSP00000245414,9606.ENSP00000257570,9606.ENSP00000270139,9606.ENSP00000276927,9606.ENSP00000294728,9606.ENSP00000306565,9606.ENSP00000315768,9606.ENSP00000316176,9606.ENSP00000329418,9606.ENSP00000330341,9606.ENSP00000333657,9606.ENSP00000342278,9606.ENSP00000342513,9606.ENSP00000343204,9606.ENSP00000343957,9606.ENSP00000354394,9606.ENSP00000356530,9606.ENSP00000360869,…	USP18,IRF1,OASL,IFNAR1,IFNA1,VCAM1,ISG20,STAT2,UBE2N,SOCS1,SOCS3,MX2,OAS2,IFI6,JAK1,IFNAR2,STAT1,RNASEL,IFIT1,IFIT3,IFIT2,ISG15,IFNA2,IFNB1,RSAD2,IRF9,IRF7,MX1,IFITM3,OAS1,TYK2,IFI27
1	HSA-449147	Signaling by Interleukins	36	440	1.14	0.00012	9606.ENSP00000225831,9606.ENSP00000227752,9606.ENSP00000231449,9606.ENSP00000263341,9606.ENSP00000264657,9606.ENSP00000284981,9606.ENSP00000290200,9606.ENSP00000291700,9606.ENSP00000294728,9606.ENSP00000306512,9606.ENSP00000311032,9606.ENSP00000315768,9606.ENSP00000316176,9606.ENSP00000329418,9606.ENSP00000330341,9606.ENSP00000340305,9606.ENSP00000343204,9606.ENSP00000344192,9606.ENSP00000346032,…	CCL2,IL10RA,IL4,IL1B,STAT3,APP,IL10RB,S100B,VCAM1,CXCL8,CASP3,STAT2,UBE2N,SOCS1,SOCS3,UBE2V1,JAK1,IL17A,ANXA2,FYN,FN1,STAT1,IL6R,IRAK1,IL6ST,CXCL1,YWHAZ,ITGB1,ITGB2,IL6,TNF,MYD88,IL10,TYK2,TRAF6,IL12RB1
1	HSA-6785807	Interleukin-4 and Interleukin-13 signaling	19	107	1.47	0.00013	9606.ENSP00000225831,9606.ENSP00000231449,9606.ENSP00000263341,9606.ENSP00000264657,9606.ENSP00000294728,9606.ENSP00000306512,9606.ENSP00000329418,9606.ENSP00000330341,9606.ENSP00000343204,9606.ENSP00000344192,9606.ENSP00000346839,9606.ENSP00000354394,9606.ENSP00000357470,9606.ENSP00000379350,9606.ENSP00000380948,9606.ENSP00000385675,9606.ENSP00000398698,9606.ENSP00000412237,9606.ENSP00000431885	CCL2,IL4,IL1B,STAT3,VCAM1,CXCL8,SOCS1,SOCS3,JAK1,IL17A,FN1,STAT1,IL6R,ITGB1,ITGB2,IL6,TNF,IL10,TYK2
1	HSA-912694	Regulation of IFNA signaling	12	25	1.9	0.00014	9606.ENSP00000215794,9606.ENSP00000270139,9606.ENSP00000276927,9606.ENSP00000315768,9606.ENSP00000329418,9606.ENSP00000330341,9606.ENSP00000343204,9606.ENSP00000343957,9606.ENSP00000354394,9606.ENSP00000369554,9606.ENSP00000369581,9606.ENSP00000431885	USP18,IFNAR1,IFNA1,STAT2,SOCS1,SOCS3,JAK1,IFNAR2,STAT1,IFNA2,IFNB1,TYK2
1	HSA-6783783	Interleukin-10 signaling	12	45	1.65	0.00023	9606.ENSP00000225831,9606.ENSP00000227752,9606.ENSP00000263341,9606.ENSP00000264657,9606.ENSP00000290200,9606.ENSP00000306512,9606.ENSP00000343204,9606.ENSP00000379110,9606.ENSP00000385675,9606.ENSP00000398698,9606.ENSP00000412237,9606.ENSP00000431885	CCL2,IL10RA,IL1B,STAT3,IL10RB,CXCL8,JAK1,CXCL1,IL6,TNF,IL10,TYK2
1	HSA-168898	Toll-like Receptor Cascades	15	152	1.22	0.00024	9606.ENSP00000227471,9606.ENSP00000233242,9606.ENSP00000284981,9606.ENSP00000291700,9606.ENSP00000316176,9606.ENSP00000329418,9606.ENSP00000340305,9606.ENSP00000345344,9606.ENSP00000345672,9606.ENSP00000358997,9606.ENSP00000370034,9606.ENSP00000380697,9606.ENSP00000380948,9606.ENSP00000401399,9606.ENSP00000433623	UNC93B1,APOB,APP,S100B,UBE2N,SOCS1,UBE2V1,CTSL,CTSB,IRAK1,TLR7,IRF7,ITGB2,MYD88,TRAF6
1	HSA-1059683	Interleukin-6 signaling	8	11	2.09	0.00026	9606.ENSP00000264657,9606.ENSP00000330341,9606.ENSP00000343204,9606.ENSP00000354394,9606.ENSP00000357470,9606.ENSP00000370698,9606.ENSP00000385675,9606.ENSP00000431885	STAT3,SOCS3,JAK1,STAT1,IL6R,IL6ST,IL6,TYK2
1	HSA-1169410	Antiviral mechanism by IFN-stimulated genes	12	81	1.39	0.00035	9606.ENSP00000215794,9606.ENSP00000257570,9606.ENSP00000316176,9606.ENSP00000333657,9606.ENSP00000342278,9606.ENSP00000343204,9606.ENSP00000354394,9606.ENSP00000356530,9606.ENSP00000360869,9606.ENSP00000368699,9606.ENSP00000381601,9606.ENSP00000388001	USP18,OASL,UBE2N,MX2,OAS2,JAK1,STAT1,RNASEL,IFIT1,ISG15,MX1,OAS1
1	HSA-9024446	NR1H2 and NR1H3-mediated signaling	10	47	1.55	0.00035	9606.ENSP00000252486,9606.ENSP00000253727,9606.ENSP00000260645,9606.ENSP00000272286,9606.ENSP00000304592,9606.ENSP00000348069,9606.ENSP00000354995,9606.ENSP00000363817,9606.ENSP00000363868,9606.ENSP00000419692	APOE,NR1H2,ABCG5,ABCG8,FASN,SREBF1,ABCG1,RXRB,ABCA1,RXRA
1	HSA-168249	Innate Immune System	29	1025	0.67	0.00035	9606.ENSP00000227471,9606.ENSP00000233242,9606.ENSP00000263088,9606.ENSP00000263341,9606.ENSP00000276927,9606.ENSP00000284981,9606.ENSP00000291700,9606.ENSP00000316176,9606.ENSP00000329418,9606.ENSP00000340305,9606.ENSP00000342793,9606.ENSP00000345344,9606.ENSP00000345672,9606.ENSP00000346032,9606.ENSP00000346671,9606.ENSP00000358997,9606.ENSP00000362205,9606.ENSP00000368699,9606.ENSP00000369554,…	UNC93B1,APOB,PLD2,IL1B,IFNA1,APP,S100B,UBE2N,SOCS1,UBE2V1,PLD1,CTSL,CTSB,ANXA2,FYN,IRAK1,TREM2,ISG15,IFNA2,IFNB1,TLR7,PLD4,CXCL1,IRF7,ITGB2,PLD3,MYD88,TRAF6,ELANE
1	HSA-162582	Signal Transduction	47	2741	0.46	0.00039	9606.ENSP00000225831,9606.ENSP00000233242,9606.ENSP00000236850,9606.ENSP00000243077,9606.ENSP00000252486,9606.ENSP00000253727,9606.ENSP00000260645,9606.ENSP00000264657,9606.ENSP00000267257,9606.ENSP00000272286,9606.ENSP00000284981,9606.ENSP00000291700,9606.ENSP00000303634,9606.ENSP00000304592,9606.ENSP00000306512,9606.ENSP00000311032,9606.ENSP00000314151,9606.ENSP00000320295,9606.ENSP00000323929,…	CCL2,APOB,APOA1,LRP1,APOE,NR1H2,ABCG5,STAT3,PXN,ABCG8,APP,S100B,LRP8,FASN,CXCL8,CASP3,KLK3,TUBB3,A2M,GSK3B,CD28,SOCS1,SOCS3,JAK1,FYN,FN1,SREBF1,RXRG,STAT1,ABCG1,IL6R,IRAK1,RXRB,ABCA1,IL6ST,CXCL1,YWHAZ,ITGB1,IL6,TNF,MYD88,RXRA,CDK5,TYK2,TRAF6,ITGB3,LDLR
1	HSA-109582	Hemostasis	22	605	0.78	0.0004	9606.ENSP00000233242,9606.ENSP00000236850,9606.ENSP00000245414,9606.ENSP00000264690,9606.ENSP00000276927,9606.ENSP00000284981,9606.ENSP00000303634,9606.ENSP00000320295,9606.ENSP00000323929,9606.ENSP00000324173,9606.ENSP00000346032,9606.ENSP00000346671,9606.ENSP00000346839,9606.ENSP00000357801,9606.ENSP00000369554,9606.ENSP00000369581,9606.ENSP00000379287,9606.ENSP00000379350,9606.ENSP00000380227,…	APOB,APOA1,IRF1,KLKB1,IFNA1,APP,LRP8,TUBB3,A2M,HSPA5,ANXA2,FYN,FN1,S100A10,IFNA2,IFNB1,YWHAZ,ITGB1,ITGA4,ITGB2,CDK5,ITGB3
1	HSA-877300	Interferon gamma signaling	11	88	1.32	0.00041	9606.ENSP00000245414,9606.ENSP00000257570,9606.ENSP00000294728,9606.ENSP00000329418,9606.ENSP00000330341,9606.ENSP00000342278,9606.ENSP00000343204,9606.ENSP00000354394,9606.ENSP00000380073,9606.ENSP00000380697,9606.ENSP00000388001	IRF1,OASL,VCAM1,SOCS1,SOCS3,OAS2,JAK1,STAT1,IRF9,IRF7,OAS1
1	HSA-975110	TRAF6 mediated IRF7 activation in TLR7/8 or 9 signaling	7	13	1.95	0.00047	9606.ENSP00000316176,9606.ENSP00000340305,9606.ENSP00000358997,9606.ENSP00000370034,9606.ENSP00000380697,9606.ENSP00000401399,9606.ENSP00000433623	UBE2N,UBE2V1,IRAK1,TLR7,IRF7,MYD88,TRAF6
1	HSA-9029569	NR1H3 & NR1H2 regulate gene expression linked to cholesterol transport and efflux	8	37	1.56	0.00047	9606.ENSP00000252486,9606.ENSP00000253727,9606.ENSP00000260645,9606.ENSP00000272286,9606.ENSP00000354995,9606.ENSP00000363817,9606.ENSP00000363868,9606.ENSP00000419692	APOE,NR1H2,ABCG5,ABCG8,ABCG1,RXRB,ABCA1,RXRA
1	HSA-1474244	Extracellular matrix organization	15	301	0.92	0.00049	9606.ENSP00000215637,9606.ENSP00000264690,9606.ENSP00000267082,9606.ENSP00000284981,9606.ENSP00000294728,9606.ENSP00000311032,9606.ENSP00000323929,9606.ENSP00000345344,9606.ENSP00000345672,9606.ENSP00000346839,9606.ENSP00000379350,9606.ENSP00000380227,9606.ENSP00000380948,9606.ENSP00000452786,9606.ENSP00000466090	MADCAM1,KLKB1,ITGB7,APP,VCAM1,CASP3,A2M,CTSL,CTSB,FN1,ITGB1,ITGA4,ITGB2,ITGB3,ELANE
1	HSA-174824	Plasma lipoprotein assembly, remodeling, and clearance	9	71	1.33	0.0005	9606.ENSP00000233242,9606.ENSP00000236850,9606.ENSP00000252486,9606.ENSP00000253727,9606.ENSP00000323929,9606.ENSP00000354995,9606.ENSP00000363868,9606.ENSP00000371532,9606.ENSP00000454071	APOB,APOA1,APOE,NR1H2,A2M,ABCG1,ABCA1,VLDLR,LDLR
1	HSA-1643685	Disease	31	1548	0.52	0.0005	9606.ENSP00000227471,9606.ENSP00000236850,9606.ENSP00000260645,9606.ENSP00000263341,9606.ENSP00000264657,9606.ENSP00000264690,9606.ENSP00000270139,9606.ENSP00000272286,9606.ENSP00000284981,9606.ENSP00000315768,9606.ENSP00000320295,9606.ENSP00000324806,9606.ENSP00000324890,9606.ENSP00000343204,9606.ENSP00000343957,9606.ENSP00000345344,9606.ENSP00000346671,9606.ENSP00000346839,9606.ENSP00000354394,…	UNC93B1,APOA1,ABCG5,IL1B,STAT3,KLKB1,IFNAR1,ABCG8,APP,STAT2,TUBB3,GSK3B,CD28,JAK1,IFNAR2,CTSL,FYN,FN1,STAT1,IL6R,ABCA1,ISG15,TLR7,ITGB1,ITGA4,IL6,MYD88,IL10,CDK5,TYK2,ITGB3
1	HSA-9679506	SARS-CoV Infections	11	145	1.1	0.00053	9606.ENSP00000270139,9606.ENSP00000315768,9606.ENSP00000324806,9606.ENSP00000343204,9606.ENSP00000343957,9606.ENSP00000345344,9606.ENSP00000357470,9606.ENSP00000370034,9606.ENSP00000379350,9606.ENSP00000380227,9606.ENSP00000431885	IFNAR1,STAT2,GSK3B,JAK1,IFNAR2,CTSL,IL6R,TLR7,ITGB1,ITGA4,TYK2
1	HSA-9679191	Potential therapeutics for SARS	9	81	1.27	0.00053	9606.ENSP00000270139,9606.ENSP00000315768,9606.ENSP00000343204,9606.ENSP00000343957,9606.ENSP00000357470,9606.ENSP00000370034,9606.ENSP00000379350,9606.ENSP00000380227,9606.ENSP00000431885	IFNAR1,STAT2,JAK1,IFNAR2,IL6R,TLR7,ITGB1,ITGA4,TYK2
1	HSA-447115	Interleukin-12 family signaling	8	56	1.38	0.00053	9606.ENSP00000264657,9606.ENSP00000343204,9606.ENSP00000346032,9606.ENSP00000354394,9606.ENSP00000370698,9606.ENSP00000412237,9606.ENSP00000431885,9606.ENSP00000470788	STAT3,JAK1,ANXA2,STAT1,IL6ST,IL10,TYK2,IL12RB1
1	HSA-975155	MyD88 dependent cascade initiated on endosome	9	90	1.22	0.00053	9606.ENSP00000284981,9606.ENSP00000291700,9606.ENSP00000316176,9606.ENSP00000340305,9606.ENSP00000358997,9606.ENSP00000370034,9606.ENSP00000380697,9606.ENSP00000401399,9606.ENSP00000433623	APP,S100B,UBE2N,UBE2V1,IRAK1,TLR7,IRF7,MYD88,TRAF6
1	HSA-166016	Toll Like Receptor 4 (TLR4) Cascade	10	126	1.12	0.00053	9606.ENSP00000284981,9606.ENSP00000291700,9606.ENSP00000316176,9606.ENSP00000329418,9606.ENSP00000340305,9606.ENSP00000358997,9606.ENSP00000380697,9606.ENSP00000380948,9606.ENSP00000401399,9606.ENSP00000433623	APP,S100B,UBE2N,SOCS1,UBE2V1,IRAK1,IRF7,ITGB2,MYD88,TRAF6
1	HSA-112411	MAPK1 (ERK2) activation	5	9	1.97	0.0007	9606.ENSP00000343204,9606.ENSP00000357470,9606.ENSP00000370698,9606.ENSP00000385675,9606.ENSP00000431885	JAK1,IL6R,IL6ST,IL6,TYK2
1	HSA-9029558	NR1H2 & NR1H3 regulate gene expression linked to lipogenesis	5	9	1.97	0.0007	9606.ENSP00000253727,9606.ENSP00000304592,9606.ENSP00000348069,9606.ENSP00000363817,9606.ENSP00000419692	NR1H2,FASN,SREBF1,RXRB,RXRA
1	HSA-446652	Interleukin-1 family signaling	10	136	1.09	0.0007	9606.ENSP00000231449,9606.ENSP00000263341,9606.ENSP00000264657,9606.ENSP00000284981,9606.ENSP00000291700,9606.ENSP00000316176,9606.ENSP00000340305,9606.ENSP00000358997,9606.ENSP00000401399,9606.ENSP00000433623	IL4,IL1B,STAT3,APP,S100B,UBE2N,UBE2V1,IRAK1,MYD88,TRAF6
1	HSA-110056	MAPK3 (ERK1) activation	5	10	1.92	0.00075	9606.ENSP00000343204,9606.ENSP00000357470,9606.ENSP00000370698,9606.ENSP00000385675,9606.ENSP00000431885	JAK1,IL6R,IL6ST,IL6,TYK2
1	HSA-1280218	Adaptive Immune System	20	743	0.65	0.00076	9606.ENSP00000215637,9606.ENSP00000267082,9606.ENSP00000294728,9606.ENSP00000316176,9606.ENSP00000320295,9606.ENSP00000324173,9606.ENSP00000324890,9606.ENSP00000329418,9606.ENSP00000330341,9606.ENSP00000340305,9606.ENSP00000345344,9606.ENSP00000345672,9606.ENSP00000346671,9606.ENSP00000362205,9606.ENSP00000379287,9606.ENSP00000379350,9606.ENSP00000380227,9606.ENSP00000380948,9606.ENSP00000401399,…	MADCAM1,ITGB7,VCAM1,UBE2N,TUBB3,HSPA5,CD28,SOCS1,SOCS3,UBE2V1,CTSL,CTSB,FYN,TREM2,YWHAZ,ITGB1,ITGA4,ITGB2,MYD88,TRAF6
1	HSA-8854691	Interleukin-20 family signaling	6	25	1.6	0.00076	9606.ENSP00000264657,9606.ENSP00000290200,9606.ENSP00000315768,9606.ENSP00000343204,9606.ENSP00000354394,9606.ENSP00000431885	STAT3,IL10RB,STAT2,JAK1,STAT1,TYK2
1	HSA-1169408	ISG15 antiviral mechanism	8	73	1.26	0.00077	9606.ENSP00000215794,9606.ENSP00000316176,9606.ENSP00000333657,9606.ENSP00000343204,9606.ENSP00000354394,9606.ENSP00000360869,9606.ENSP00000368699,9606.ENSP00000381601	USP18,UBE2N,MX2,JAK1,STAT1,IFIT1,ISG15,MX1
1	HSA-9020956	Interleukin-27 signaling	5	11	1.88	0.00079	9606.ENSP00000264657,9606.ENSP00000343204,9606.ENSP00000354394,9606.ENSP00000370698,9606.ENSP00000431885	STAT3,JAK1,STAT1,IL6ST,TYK2
1	HSA-168928	DDX58/IFIH1-mediated induction of interferon-alpha/beta	8	76	1.25	0.00084	9606.ENSP00000276927,9606.ENSP00000284981,9606.ENSP00000291700,9606.ENSP00000368699,9606.ENSP00000369554,9606.ENSP00000369581,9606.ENSP00000380697,9606.ENSP00000433623	IFNA1,APP,S100B,ISG15,IFNA2,IFNB1,IRF7,TRAF6
1	HSA-8984722	Interleukin-35 Signalling	5	12	1.84	0.00098	9606.ENSP00000264657,9606.ENSP00000343204,9606.ENSP00000354394,9606.ENSP00000370698,9606.ENSP00000431885	STAT3,JAK1,STAT1,IL6ST,TYK2
1	HSA-216083	Integrin cell surface interactions	8	85	1.2	0.001	9606.ENSP00000215637,9606.ENSP00000267082,9606.ENSP00000294728,9606.ENSP00000346839,9606.ENSP00000379350,9606.ENSP00000380227,9606.ENSP00000380948,9606.ENSP00000452786	MADCAM1,ITGB7,VCAM1,FN1,ITGB1,ITGA4,ITGB2,ITGB3
1	HSA-445989	TAK1 activates NFkB by phosphorylation and activation of IKKs complex	6	32	1.5	0.001	9606.ENSP00000284981,9606.ENSP00000291700,9606.ENSP00000316176,9606.ENSP00000340305,9606.ENSP00000358997,9606.ENSP00000433623	APP,S100B,UBE2N,UBE2V1,IRAK1,TRAF6
1	HSA-8964043	Plasma lipoprotein clearance	6	33	1.48	0.001	9606.ENSP00000233242,9606.ENSP00000236850,9606.ENSP00000252486,9606.ENSP00000253727,9606.ENSP00000371532,9606.ENSP00000454071	APOB,APOA1,APOE,NR1H2,VLDLR,LDLR
1	HSA-975138	TRAF6 mediated induction of NFkB and MAP kinases upon TLR7/8 or 9 activation	8	89	1.18	0.001	9606.ENSP00000284981,9606.ENSP00000291700,9606.ENSP00000316176,9606.ENSP00000340305,9606.ENSP00000358997,9606.ENSP00000370034,9606.ENSP00000401399,9606.ENSP00000433623	APP,S100B,UBE2N,UBE2V1,IRAK1,TLR7,MYD88,TRAF6
1	HSA-166058	MyD88:MAL(TIRAP) cascade initiated on plasma membrane	8	94	1.15	0.001	9606.ENSP00000284981,9606.ENSP00000291700,9606.ENSP00000316176,9606.ENSP00000329418,9606.ENSP00000340305,9606.ENSP00000358997,9606.ENSP00000401399,9606.ENSP00000433623	APP,S100B,UBE2N,SOCS1,UBE2V1,IRAK1,MYD88,TRAF6
1	HSA-9020702	Interleukin-1 signaling	8	99	1.13	0.0011	9606.ENSP00000263341,9606.ENSP00000284981,9606.ENSP00000291700,9606.ENSP00000316176,9606.ENSP00000340305,9606.ENSP00000358997,9606.ENSP00000401399,9606.ENSP00000433623	IL1B,APP,S100B,UBE2N,UBE2V1,IRAK1,MYD88,TRAF6
1	HSA-8963898	Plasma lipoprotein assembly	5	19	1.64	0.0011	9606.ENSP00000233242,9606.ENSP00000236850,9606.ENSP00000252486,9606.ENSP00000323929,9606.ENSP00000363868	APOB,APOA1,APOE,A2M,ABCA1
1	HSA-975634	Retinoid metabolism and transport	6	44	1.36	0.0011	9606.ENSP00000233242,9606.ENSP00000236850,9606.ENSP00000243077,9606.ENSP00000252486,9606.ENSP00000303634,9606.ENSP00000454071	APOB,APOA1,LRP1,APOE,LRP8,LDLR
1	HSA-1483148	Synthesis of PG	4	8	1.92	0.0014	9606.ENSP00000263088,9606.ENSP00000342793,9606.ENSP00000376372,9606.ENSP00000387050	PLD2,PLD1,PLD4,PLD3
1	HSA-5663205	Infectious disease	19	826	0.59	0.0014	9606.ENSP00000263341,9606.ENSP00000270139,9606.ENSP00000284981,9606.ENSP00000315768,9606.ENSP00000320295,9606.ENSP00000324806,9606.ENSP00000324890,9606.ENSP00000343204,9606.ENSP00000343957,9606.ENSP00000345344,9606.ENSP00000346671,9606.ENSP00000357470,9606.ENSP00000368699,9606.ENSP00000370034,9606.ENSP00000379350,9606.ENSP00000380227,9606.ENSP00000385675,9606.ENSP00000412237,9606.ENSP00000431885	IL1B,IFNAR1,APP,STAT2,TUBB3,GSK3B,CD28,JAK1,IFNAR2,CTSL,FYN,IL6R,ISG15,TLR7,ITGB1,ITGA4,IL6,IL10,TYK2
1	HSA-8983711	OAS antiviral response	4	9	1.87	0.0014	9606.ENSP00000257570,9606.ENSP00000342278,9606.ENSP00000356530,9606.ENSP00000388001	OASL,OAS2,RNASEL,OAS1
1	HSA-9006931	Signaling by Nuclear Receptors	11	265	0.84	0.0014	9606.ENSP00000252486,9606.ENSP00000253727,9606.ENSP00000260645,9606.ENSP00000272286,9606.ENSP00000304592,9606.ENSP00000348069,9606.ENSP00000352900,9606.ENSP00000354995,9606.ENSP00000363817,9606.ENSP00000363868,9606.ENSP00000419692	APOE,NR1H2,ABCG5,ABCG8,FASN,SREBF1,RXRG,ABCG1,RXRB,ABCA1,RXRA
1	HSA-975871	MyD88 cascade initiated on plasma membrane	7	84	1.14	0.0014	9606.ENSP00000284981,9606.ENSP00000291700,9606.ENSP00000316176,9606.ENSP00000340305,9606.ENSP00000358997,9606.ENSP00000401399,9606.ENSP00000433623	APP,S100B,UBE2N,UBE2V1,IRAK1,MYD88,TRAF6
1	HSA-933541	TRAF6 mediated IRF7 activation	5	28	1.48	0.0014	9606.ENSP00000276927,9606.ENSP00000369554,9606.ENSP00000369581,9606.ENSP00000380697,9606.ENSP00000433623	IFNA1,IFNA2,IFNB1,IRF7,TRAF6
1	HSA-168164	Toll Like Receptor 3 (TLR3) Cascade	7	92	1.1	0.0014	9606.ENSP00000284981,9606.ENSP00000291700,9606.ENSP00000316176,9606.ENSP00000340305,9606.ENSP00000358997,9606.ENSP00000380697,9606.ENSP00000433623	APP,S100B,UBE2N,UBE2V1,IRAK1,IRF7,TRAF6
1	HSA-1679131	Trafficking and processing of endosomal TLR	4	13	1.71	0.0014	9606.ENSP00000227471,9606.ENSP00000345344,9606.ENSP00000345672,9606.ENSP00000370034	UNC93B1,CTSL,CTSB,TLR7
1	HSA-937061	TRIF(TICAM1)-mediated TLR4 signaling	7	96	1.09	0.0018	9606.ENSP00000284981,9606.ENSP00000291700,9606.ENSP00000316176,9606.ENSP00000340305,9606.ENSP00000358997,9606.ENSP00000380697,9606.ENSP00000433623	APP,S100B,UBE2N,UBE2V1,IRAK1,IRF7,TRAF6
1	HSA-877312	Regulation of IFNG signaling	4	14	1.68	0.002	9606.ENSP00000329418,9606.ENSP00000330341,9606.ENSP00000343204,9606.ENSP00000354394	SOCS1,SOCS3,JAK1,STAT1
1	HSA-937039	IRAK1 recruits IKK complex	4	14	1.68	0.002	9606.ENSP00000316176,9606.ENSP00000340305,9606.ENSP00000358997,9606.ENSP00000433623	UBE2N,UBE2V1,IRAK1,TRAF6
1	HSA-975144	IRAK1 recruits IKK complex upon TLR7/8 or 9 stimulation	4	14	1.68	0.0021	9606.ENSP00000316176,9606.ENSP00000340305,9606.ENSP00000358997,9606.ENSP00000433623	UBE2N,UBE2V1,IRAK1,TRAF6
1	HSA-1369062	ABC transporters in lipid homeostasis	4	18	1.57	0.0021	9606.ENSP00000236850,9606.ENSP00000260645,9606.ENSP00000272286,9606.ENSP00000354995	APOA1,ABCG5,ABCG8,ABCG1
1	HSA-8964026	Chylomicron clearance	3	5	2	0.0024	9606.ENSP00000233242,9606.ENSP00000252486,9606.ENSP00000454071	APOB,APOE,LDLR
1	HSA-9031525	NR1H2 & NR1H3 regulate gene expression to limit cholesterol uptake	3	5	2	0.0029	9606.ENSP00000253727,9606.ENSP00000363817,9606.ENSP00000419692	NR1H2,RXRB,RXRA
1	HSA-9031528	NR1H2 & NR1H3 regulate gene expression linked to triglyceride lipolysis in adipose	3	5	2	0.003	9606.ENSP00000253727,9606.ENSP00000363817,9606.ENSP00000419692	NR1H2,RXRB,RXRA
1	HSA-9020591	Interleukin-12 signaling	5	46	1.26	0.0031	9606.ENSP00000343204,9606.ENSP00000346032,9606.ENSP00000412237,9606.ENSP00000431885,9606.ENSP00000470788	JAK1,ANXA2,IL10,TYK2,IL12RB1
1	HSA-381426	Regulation of Insulin-like Growth Factor (IGF) transport and uptake by Insulin-like Growth Factor Binding Proteins (IGFBPs)	7	124	0.97	0.0031	9606.ENSP00000233242,9606.ENSP00000236850,9606.ENSP00000252486,9606.ENSP00000284981,9606.ENSP00000314151,9606.ENSP00000346839,9606.ENSP00000385675	APOB,APOA1,APOE,APP,KLK3,FN1,IL6
1	HSA-1483206	Glycerophospholipid biosynthesis	7	128	0.96	0.0031	9606.ENSP00000260585,9606.ENSP00000263088,9606.ENSP00000317300,9606.ENSP00000342793,9606.ENSP00000376372,9606.ENSP00000387050,9606.ENSP00000441980	EPT1,PLD2,LPCAT4,PLD1,PLD4,PLD3,CEPT1
1	HSA-450321	JNK (c-Jun kinases) phosphorylation and activation mediated by activated human TAK1	4	22	1.48	0.0033	9606.ENSP00000316176,9606.ENSP00000340305,9606.ENSP00000358997,9606.ENSP00000433623	UBE2N,UBE2V1,IRAK1,TRAF6
1	HSA-198933	Immunoregulatory interactions between a Lymphoid and a non-Lymphoid cell	7	129	0.96	0.0035	9606.ENSP00000215637,9606.ENSP00000267082,9606.ENSP00000294728,9606.ENSP00000362205,9606.ENSP00000379350,9606.ENSP00000380227,9606.ENSP00000380948	MADCAM1,ITGB7,VCAM1,TREM2,ITGB1,ITGA4,ITGB2
1	HSA-449836	Other interleukin signaling	4	23	1.46	0.0036	9606.ENSP00000290200,9606.ENSP00000311032,9606.ENSP00000343204,9606.ENSP00000431885	IL10RB,CASP3,JAK1,TYK2
1	HSA-450302	Activated tak1 mediates p38 mapk activation	4	23	1.46	0.0036	9606.ENSP00000316176,9606.ENSP00000340305,9606.ENSP00000358997,9606.ENSP00000433623	UBE2N,UBE2V1,IRAK1,TRAF6
1	HSA-982772	Growth hormone receptor signaling	4	23	1.46	0.0037	9606.ENSP00000264657,9606.ENSP00000329418,9606.ENSP00000330341,9606.ENSP00000354394	STAT3,SOCS1,SOCS3,STAT1
1	HSA-202733	Cell surface interactions at the vascular wall	7	138	0.93	0.0037	9606.ENSP00000233242,9606.ENSP00000346671,9606.ENSP00000346839,9606.ENSP00000379350,9606.ENSP00000380227,9606.ENSP00000380948,9606.ENSP00000452786	APOB,FYN,FN1,ITGB1,ITGA4,ITGB2,ITGB3
1	HSA-1474228	Degradation of the extracellular matrix	7	140	0.92	0.0039	9606.ENSP00000264690,9606.ENSP00000311032,9606.ENSP00000323929,9606.ENSP00000345344,9606.ENSP00000345672,9606.ENSP00000346839,9606.ENSP00000466090	KLKB1,CASP3,A2M,CTSL,CTSB,FN1,ELANE
1	HSA-168643	Nucleotide-binding domain, leucine rich repeat containing receptor (NLR) signaling pathways	5	55	1.18	0.004	9606.ENSP00000284981,9606.ENSP00000316176,9606.ENSP00000340305,9606.ENSP00000358997,9606.ENSP00000433623	APP,UBE2N,UBE2V1,IRAK1,TRAF6
1	HSA-2029485	Role of phospholipids in phagocytosis	4	26	1.41	0.0041	9606.ENSP00000263088,9606.ENSP00000342793,9606.ENSP00000376372,9606.ENSP00000387050	PLD2,PLD1,PLD4,PLD3
1	HSA-8963896	HDL assembly	3	8	1.8	0.0041	9606.ENSP00000236850,9606.ENSP00000323929,9606.ENSP00000363868	APOA1,A2M,ABCA1
1	HSA-8985947	Interleukin-9 signaling	3	9	1.75	0.0041	9606.ENSP00000264657,9606.ENSP00000343204,9606.ENSP00000354394	STAT3,JAK1,STAT1
1	HSA-9020933	Interleukin-23 signaling	3	9	1.75	0.0041	9606.ENSP00000264657,9606.ENSP00000431885,9606.ENSP00000470788	STAT3,TYK2,IL12RB1
1	HSA-9623433	NR1H2 & NR1H3 regulate gene expression to control bile acid homeostasis	3	9	1.75	0.0042	9606.ENSP00000253727,9606.ENSP00000363817,9606.ENSP00000419692	NR1H2,RXRB,RXRA
1	HSA-373755	Semaphorin interactions	5	64	1.12	0.0043	9606.ENSP00000324806,9606.ENSP00000346671,9606.ENSP00000362205,9606.ENSP00000379350,9606.ENSP00000419782	GSK3B,FYN,TREM2,ITGB1,CDK5
1	HSA-8957275	Post-translational protein phosphorylation	6	107	0.97	0.0046	9606.ENSP00000233242,9606.ENSP00000236850,9606.ENSP00000252486,9606.ENSP00000284981,9606.ENSP00000346839,9606.ENSP00000385675	APOB,APOA1,APOE,APP,FN1,IL6
1	HSA-8963888	Chylomicron assembly	3	10	1.7	0.0047	9606.ENSP00000233242,9606.ENSP00000236850,9606.ENSP00000252486	APOB,APOA1,APOE
1	HSA-8963899	Plasma lipoprotein remodeling	4	32	1.32	0.0047	9606.ENSP00000233242,9606.ENSP00000236850,9606.ENSP00000252486,9606.ENSP00000354995	APOB,APOA1,APOE,ABCG1
1	HSA-8963901	Chylomicron remodeling	3	10	1.7	0.005	9606.ENSP00000233242,9606.ENSP00000236850,9606.ENSP00000252486	APOB,APOA1,APOE
1	HSA-8964058	HDL remodeling	3	10	1.7	0.0052	9606.ENSP00000236850,9606.ENSP00000252486,9606.ENSP00000354995	APOA1,APOE,ABCG1
1	HSA-9020958	Interleukin-21 signaling	3	10	1.7	0.0054	9606.ENSP00000264657,9606.ENSP00000343204,9606.ENSP00000354394	STAT3,JAK1,STAT1
1	HSA-448424	Interleukin-17 signaling	5	71	1.07	0.006	9606.ENSP00000316176,9606.ENSP00000340305,9606.ENSP00000344192,9606.ENSP00000358997,9606.ENSP00000433623	UBE2N,UBE2V1,IL17A,IRAK1,TRAF6
1	HSA-168638	NOD1/2 Signaling Pathway	4	36	1.27	0.006	9606.ENSP00000316176,9606.ENSP00000340305,9606.ENSP00000358997,9606.ENSP00000433623	UBE2N,UBE2V1,IRAK1,TRAF6
1	HSA-1989781	PPARA activates gene expression	6	117	0.93	0.0061	9606.ENSP00000236850,9606.ENSP00000253727,9606.ENSP00000348069,9606.ENSP00000363817,9606.ENSP00000363868,9606.ENSP00000419692	APOA1,NR1H2,SREBF1,RXRB,ABCA1,RXRA
1	HSA-209543	p75NTR recruits signalling complexes	3	13	1.59	0.0061	9606.ENSP00000358997,9606.ENSP00000401399,9606.ENSP00000433623	IRAK1,MYD88,TRAF6
1	HSA-556833	Metabolism of lipids	14	733	0.5	0.0064	9606.ENSP00000236850,9606.ENSP00000253727,9606.ENSP00000260585,9606.ENSP00000263088,9606.ENSP00000304592,9606.ENSP00000317300,9606.ENSP00000342793,9606.ENSP00000348069,9606.ENSP00000363817,9606.ENSP00000363868,9606.ENSP00000376372,9606.ENSP00000387050,9606.ENSP00000419692,9606.ENSP00000441980	APOA1,NR1H2,EPT1,PLD2,FASN,LPCAT4,PLD1,SREBF1,RXRB,ABCA1,PLD4,PLD3,RXRA,CEPT1
1	HSA-114608	Platelet degranulation	6	127	0.9	0.0068	9606.ENSP00000236850,9606.ENSP00000284981,9606.ENSP00000323929,9606.ENSP00000324173,9606.ENSP00000346839,9606.ENSP00000452786	APOA1,APP,A2M,HSPA5,FN1,ITGB3
1	HSA-2173782	Binding and Uptake of Ligands by Scavenger Receptors	4	41	1.21	0.0068	9606.ENSP00000233242,9606.ENSP00000236850,9606.ENSP00000243077,9606.ENSP00000252486	APOB,APOA1,LRP1,APOE
1	HSA-418594	G alpha (i) signalling events	10	396	0.63	0.0069	9606.ENSP00000233242,9606.ENSP00000236850,9606.ENSP00000243077,9606.ENSP00000252486,9606.ENSP00000284981,9606.ENSP00000303634,9606.ENSP00000306512,9606.ENSP00000379110,9606.ENSP00000419782,9606.ENSP00000454071	APOB,APOA1,LRP1,APOE,APP,LRP8,CXCL8,CXCL1,CDK5,LDLR
1	HSA-1433557	Signaling by SCF-KIT	4	43	1.19	0.0071	9606.ENSP00000264657,9606.ENSP00000329418,9606.ENSP00000346671,9606.ENSP00000354394	STAT3,SOCS1,FYN,STAT1
1	HSA-196854	Metabolism of vitamins and cofactors	7	189	0.79	0.0072	9606.ENSP00000233242,9606.ENSP00000236850,9606.ENSP00000243077,9606.ENSP00000252486,9606.ENSP00000303634,9606.ENSP00000304592,9606.ENSP00000454071	APOB,APOA1,LRP1,APOE,LRP8,FASN,LDLR
1	HSA-399956	CRMPs in Sema3A signaling	3	16	1.5	0.0074	9606.ENSP00000324806,9606.ENSP00000346671,9606.ENSP00000419782	GSK3B,FYN,CDK5
1	HSA-76002	Platelet activation, signaling and aggregation	8	260	0.71	0.0083	9606.ENSP00000236850,9606.ENSP00000284981,9606.ENSP00000323929,9606.ENSP00000324173,9606.ENSP00000346671,9606.ENSP00000346839,9606.ENSP00000379287,9606.ENSP00000452786	APOA1,APP,A2M,HSPA5,FYN,FN1,YWHAZ,ITGB3
1	HSA-5679090	Defective ABCG8 causes GBD4 and sitosterolemia	2	2	2.22	0.0087	9606.ENSP00000260645,9606.ENSP00000272286	ABCG5,ABCG8
1	HSA-5679096	Defective ABCG5 causes sitosterolemia	2	2	2.22	0.0088	9606.ENSP00000260645,9606.ENSP00000272286	ABCG5,ABCG8
1	HSA-5682113	Defective ABCA1 causes TGD	2	2	2.22	0.0091	9606.ENSP00000236850,9606.ENSP00000363868	APOA1,ABCA1
1	HSA-6788467	IL-6-type cytokine receptor ligand interactions	3	17	1.47	0.0096	9606.ENSP00000343204,9606.ENSP00000370698,9606.ENSP00000431885	JAK1,IL6ST,TYK2
1	HSA-2029480	Fcgamma receptor (FCGR) dependent phagocytosis	5	87	0.98	0.0101	9606.ENSP00000263088,9606.ENSP00000342793,9606.ENSP00000346671,9606.ENSP00000376372,9606.ENSP00000387050	PLD2,PLD1,FYN,PLD4,PLD3
1	HSA-9006934	Signaling by Receptor Tyrosine Kinases	11	502	0.56	0.0109	9606.ENSP00000252486,9606.ENSP00000264657,9606.ENSP00000267257,9606.ENSP00000291700,9606.ENSP00000329418,9606.ENSP00000346671,9606.ENSP00000346839,9606.ENSP00000354394,9606.ENSP00000379350,9606.ENSP00000419782,9606.ENSP00000452786	APOE,STAT3,PXN,S100B,SOCS1,FYN,FN1,STAT1,ITGB1,CDK5,ITGB3
1	HSA-168927	TICAM1, RIP1-mediated IKK complex recruitment	3	18	1.45	0.0118	9606.ENSP00000316176,9606.ENSP00000340305,9606.ENSP00000433623	UBE2N,UBE2V1,TRAF6
1	HSA-3000480	Scavenging by Class A Receptors	3	18	1.45	0.0118	9606.ENSP00000233242,9606.ENSP00000236850,9606.ENSP00000252486	APOB,APOA1,APOE
1	HSA-5684996	MAPK1/MAPK3 signaling	8	280	0.68	0.0119	9606.ENSP00000343204,9606.ENSP00000346671,9606.ENSP00000346839,9606.ENSP00000357470,9606.ENSP00000370698,9606.ENSP00000385675,9606.ENSP00000431885,9606.ENSP00000452786	JAK1,FYN,FN1,IL6R,IL6ST,IL6,TYK2,ITGB3
1	HSA-9670439	Signaling by phosphorylated juxtamembrane, extracellular and kinase domain KIT mutants	3	20	1.4	0.0152	9606.ENSP00000264657,9606.ENSP00000346671,9606.ENSP00000354394	STAT3,FYN,STAT1
1	HSA-8849474	PTK6 Activates STAT3	2	3	2.05	0.0152	9606.ENSP00000264657,9606.ENSP00000330341	STAT3,SOCS3
1	HSA-383280	Nuclear Receptor transcription pathway	4	53	1.1	0.0152	9606.ENSP00000253727,9606.ENSP00000352900,9606.ENSP00000363817,9606.ENSP00000419692	NR1H2,RXRG,RXRB,RXRA
1	HSA-983231	Factors involved in megakaryocyte development and platelet production	6	154	0.81	0.0162	9606.ENSP00000245414,9606.ENSP00000276927,9606.ENSP00000320295,9606.ENSP00000369554,9606.ENSP00000369581,9606.ENSP00000419782	IRF1,IFNA1,TUBB3,IFNA2,IFNB1,CDK5
1	HSA-937041	IKK complex recruitment mediated by RIP1	3	22	1.36	0.0181	9606.ENSP00000316176,9606.ENSP00000340305,9606.ENSP00000433623	UBE2N,UBE2V1,TRAF6
1	HSA-6811558	PI5P, PP2A and IER3 Regulate PI3K/AKT Signaling	5	105	0.9	0.0189	9606.ENSP00000324890,9606.ENSP00000346671,9606.ENSP00000358997,9606.ENSP00000401399,9606.ENSP00000433623	CD28,FYN,IRAK1,MYD88,TRAF6
1	HSA-446343	Localization of the PINCH-ILK-PARVIN complex to focal adhesions	2	4	1.92	0.0193	9606.ENSP00000267257,9606.ENSP00000379350	PXN,ITGB1
1	HSA-933542	TRAF6 mediated NF-kB activation	3	24	1.32	0.0199	9606.ENSP00000284981,9606.ENSP00000291700,9606.ENSP00000433623	APP,S100B,TRAF6
1	HSA-1266695	Interleukin-7 signaling	3	25	1.3	0.0201	9606.ENSP00000264657,9606.ENSP00000329418,9606.ENSP00000343204	STAT3,SOCS1,JAK1
1	HSA-8866376	Reelin signalling pathway	2	5	1.83	0.0211	9606.ENSP00000346671,9606.ENSP00000371532	FYN,VLDLR
1	HSA-9632974	NR1H2 & NR1H3 regulate gene expression linked to gluconeogenesis	2	5	1.83	0.0217	9606.ENSP00000363817,9606.ENSP00000419692	RXRB,RXRA
1	HSA-3000170	Syndecan interactions	3	27	1.27	0.0227	9606.ENSP00000346839,9606.ENSP00000379350,9606.ENSP00000452786	FN1,ITGB1,ITGB3
1	HSA-1566977	Fibronectin matrix formation	2	6	1.75	0.0229	9606.ENSP00000346839,9606.ENSP00000379350	FN1,ITGB1
1	HSA-3000471	Scavenging by Class B Receptors	2	6	1.75	0.0257	9606.ENSP00000233242,9606.ENSP00000236850	APOB,APOA1
1	HSA-8964046	VLDL clearance	2	6	1.75	0.027	9606.ENSP00000233242,9606.ENSP00000371532	APOB,VLDLR
1	HSA-381042	PERK regulates gene expression	3	32	1.2	0.027	9606.ENSP00000225831,9606.ENSP00000306512,9606.ENSP00000324173	CCL2,CXCL8,HSPA5
1	HSA-3134963	DEx/H-box helicases activate type I IFN and inflammatory cytokines production	2	7	1.68	0.027	9606.ENSP00000380697,9606.ENSP00000401399	IRF7,MYD88
1	HSA-5619084	ABC transporter disorders	4	75	0.95	0.0277	9606.ENSP00000236850,9606.ENSP00000260645,9606.ENSP00000272286,9606.ENSP00000363868	APOA1,ABCG5,ABCG8,ABCA1
1	HSA-3000178	ECM proteoglycans	4	76	0.94	0.0284	9606.ENSP00000284981,9606.ENSP00000346839,9606.ENSP00000379350,9606.ENSP00000452786	APP,FN1,ITGB1,ITGB3
1	HSA-382551	Transport of small molecules	12	721	0.44	0.0285	9606.ENSP00000233242,9606.ENSP00000236850,9606.ENSP00000252486,9606.ENSP00000253727,9606.ENSP00000260645,9606.ENSP00000262209,9606.ENSP00000272286,9606.ENSP00000323929,9606.ENSP00000354995,9606.ENSP00000363868,9606.ENSP00000371532,9606.ENSP00000454071	APOB,APOA1,APOE,NR1H2,ABCG5,TRPA1,ABCG8,A2M,ABCG1,ABCA1,VLDLR,LDLR
1	HSA-977225	Amyloid fiber formation	4	78	0.93	0.0298	9606.ENSP00000236850,9606.ENSP00000260197,9606.ENSP00000284981,9606.ENSP00000338345	APOA1,SORL1,APP,SNCA
1	HSA-8939242	RUNX1 regulates transcription of genes involved in differentiation of keratinocytes	2	8	1.62	0.0318	9606.ENSP00000330341,9606.ENSP00000345344	SOCS3,CTSL
1	HSA-5621481	C-type lectin receptors (CLRs)	5	136	0.79	0.0342	9606.ENSP00000263341,9606.ENSP00000316176,9606.ENSP00000340305,9606.ENSP00000346671,9606.ENSP00000433623	IL1B,UBE2N,UBE2V1,FYN,TRAF6
1	HSA-73887	Death Receptor Signalling	5	140	0.78	0.0344	9606.ENSP00000311032,9606.ENSP00000358997,9606.ENSP00000398698,9606.ENSP00000401399,9606.ENSP00000433623	CASP3,IRAK1,TNF,MYD88,TRAF6
1	HSA-2129379	Molecules associated with elastic fibres	3	38	1.12	0.0344	9606.ENSP00000346839,9606.ENSP00000379350,9606.ENSP00000452786	FN1,ITGB1,ITGB3
1	HSA-445355	Smooth Muscle Contraction	3	38	1.12	0.0351	9606.ENSP00000267257,9606.ENSP00000346032,9606.ENSP00000386881	PXN,ANXA2,DYSF
1	HSA-9662834	CD163 mediating an anti-inflammatory response	2	9	1.57	0.0361	9606.ENSP00000385675,9606.ENSP00000412237	IL6,IL10
1	HSA-1483166	Synthesis of PA	3	39	1.11	0.0362	9606.ENSP00000263088,9606.ENSP00000317300,9606.ENSP00000342793	PLD2,LPCAT4,PLD1
1	HSA-2426168	Activation of gene expression by SREBF (SREBP)	3	42	1.08	0.0382	9606.ENSP00000304592,9606.ENSP00000348069,9606.ENSP00000419692	FASN,SREBF1,RXRA
1	HSA-9646399	Aggrephagy	3	42	1.08	0.0405	9606.ENSP00000316176,9606.ENSP00000320295,9606.ENSP00000340305	UBE2N,TUBB3,UBE2V1
1	HSA-5362517	Signaling by Retinoic Acid	3	43	1.07	0.041	9606.ENSP00000352900,9606.ENSP00000363817,9606.ENSP00000419692	RXRG,RXRB,RXRA
1	HSA-2586552	Signaling by Leptin	2	11	1.48	0.041	9606.ENSP00000264657,9606.ENSP00000330341	STAT3,SOCS3
1	HSA-193704	p75 NTR receptor-mediated signalling	4	96	0.84	0.041	9606.ENSP00000311032,9606.ENSP00000358997,9606.ENSP00000401399,9606.ENSP00000433623	CASP3,IRAK1,MYD88,TRAF6
1	HSA-210990	PECAM1 interactions	2	12	1.45	0.041	9606.ENSP00000346671,9606.ENSP00000452786	FYN,ITGB3
1	HSA-264870	Caspase-mediated cleavage of cytoskeletal proteins	2	12	1.45	0.041	9606.ENSP00000311032,9606.ENSP00000340820	CASP3,MAPT
1	HSA-389359	CD28 dependent Vav1 pathway	2	12	1.45	0.041	9606.ENSP00000324890,9606.ENSP00000346671	CD28,FYN
1	HSA-5607764	CLEC7A (Dectin-1) signaling	4	96	0.84	0.041	9606.ENSP00000263341,9606.ENSP00000316176,9606.ENSP00000340305,9606.ENSP00000433623	IL1B,UBE2N,UBE2V1,TRAF6
1	HSA-8866427	VLDLR internalisation and degradation	2	12	1.45	0.041	9606.ENSP00000253727,9606.ENSP00000371532	NR1H2,VLDLR
1	HSA-9673767	Signaling by PDGFRA transmembrane, juxtamembrane and kinase domain mutants	2	12	1.45	0.045	9606.ENSP00000264657,9606.ENSP00000354394	STAT3,STAT1
1	HSA-9673770	Signaling by PDGFRA extracellular domain mutants	2	12	1.45	0.045	9606.ENSP00000264657,9606.ENSP00000354394	STAT3,STAT1
1	HSA-512988	Interleukin-3, Interleukin-5 and GM-CSF signaling	3	48	1.02	0.0452	9606.ENSP00000343204,9606.ENSP00000346671,9606.ENSP00000379287	JAK1,FYN,YWHAZ
1	HSA-1483213	Synthesis of PE	2	13	1.41	0.0452	9606.ENSP00000260585,9606.ENSP00000441980	EPT1,CEPT1
1	HSA-209560	NF-kB is activated and signals survival	2	13	1.41	0.0452	9606.ENSP00000358997,9606.ENSP00000433623	IRAK1,TRAF6
1	HSA-2168880	Scavenging of heme from plasma	2	13	1.41	0.0452	9606.ENSP00000236850,9606.ENSP00000243077	APOA1,LRP1
1	HSA-75205	Dissolution of Fibrin Clot	2	13	1.41	0.0452	9606.ENSP00000346032,9606.ENSP00000357801	ANXA2,S100A10
1	HSA-879415	Advanced glycosylation endproduct receptor signaling	2	13	1.41	0.0452	9606.ENSP00000284981,9606.ENSP00000291700	APP,S100B
1	HSA-8983432	Interleukin-15 signaling	2	13	1.41	0.0489	9606.ENSP00000264657,9606.ENSP00000343204	STAT3,JAK1
1	HSA-918233	TRAF3-dependent IRF activation pathway	2	14	1.38	0.0494	9606.ENSP00000369581,9606.ENSP00000380697	IFNB1,IRF7
2	hsa04610	Complement and coagulation cascades	24	82	2.19	2.68e-44	9606.ENSP00000218099,9606.ENSP00000233156,9606.ENSP00000245907,9606.ENSP00000299367,9606.ENSP00000308541,9606.ENSP00000308938,9606.ENSP00000314299,9606.ENSP00000334145,9606.ENSP00000356030,9606.ENSP00000356037,9606.ENSP00000356395,9606.ENSP00000356399,9606.ENSP00000356671,9606.ENSP00000356771,9606.ENSP00000364709,9606.ENSP00000364731,9606.ENSP00000377783,9606.ENSP00000378130,9606.ENSP00000379191,…	F9,TFPI,C3,C2,F2,PLG,CFHR1,F3,CD55,C4BPA,CFHR3,CFH,SERPINC1,F5,F10,F7,PROS1,CFI,CD59,MASP2,C4A,C4B,CFB,ITGAM
2	HSA-166658	Complement cascade	17	57	2.2	2.88e-29	9606.ENSP00000245907,9606.ENSP00000255030,9606.ENSP00000299367,9606.ENSP00000308541,9606.ENSP00000314299,9606.ENSP00000356030,9606.ENSP00000356037,9606.ENSP00000356395,9606.ENSP00000356399,9606.ENSP00000377783,9606.ENSP00000378130,9606.ENSP00000379191,9606.ENSP00000383690,9606.ENSP00000396688,9606.ENSP00000411770,9606.ENSP00000415941,9606.ENSP00000416561	C3,CRP,C2,F2,CFHR1,CD55,C4BPA,CFHR3,CFH,PROS1,CFI,CD59,MASP2,C4A,COLEC11,C4B,CFB
2	HSA-977606	Regulation of Complement cascade	14	47	2.2	1e-23	9606.ENSP00000245907,9606.ENSP00000299367,9606.ENSP00000308541,9606.ENSP00000314299,9606.ENSP00000356030,9606.ENSP00000356037,9606.ENSP00000356395,9606.ENSP00000356399,9606.ENSP00000377783,9606.ENSP00000378130,9606.ENSP00000379191,9606.ENSP00000396688,9606.ENSP00000415941,9606.ENSP00000416561	C3,C2,F2,CFHR1,CD55,C4BPA,CFHR3,CFH,PROS1,CFI,CD59,C4A,C4B,CFB
2	HSA-168249	Innate Immune System	23	1025	1.07	9.5e-18	9606.ENSP00000216797,9606.ENSP00000226574,9606.ENSP00000242786,9606.ENSP00000245907,9606.ENSP00000255030,9606.ENSP00000295927,9606.ENSP00000299367,9606.ENSP00000308541,9606.ENSP00000314299,9606.ENSP00000356030,9606.ENSP00000356037,9606.ENSP00000356395,9606.ENSP00000356399,9606.ENSP00000377783,9606.ENSP00000378130,9606.ENSP00000379191,9606.ENSP00000383690,9606.ENSP00000384273,9606.ENSP00000396688,…	NFKBIA,NFKB1,CD97,C3,CRP,PTX3,C2,F2,CFHR1,CD55,C4BPA,CFHR3,CFH,PROS1,CFI,CD59,MASP2,RELA,C4A,COLEC11,C4B,CFB,ITGAM
2	HSA-168256	Immune System	25	1956	0.83	3.4e-14	9606.ENSP00000216797,9606.ENSP00000226574,9606.ENSP00000239938,9606.ENSP00000242786,9606.ENSP00000245907,9606.ENSP00000255030,9606.ENSP00000295927,9606.ENSP00000299367,9606.ENSP00000308541,9606.ENSP00000314299,9606.ENSP00000356030,9606.ENSP00000356037,9606.ENSP00000356395,9606.ENSP00000356399,9606.ENSP00000361359,9606.ENSP00000377783,9606.ENSP00000378130,9606.ENSP00000379191,9606.ENSP00000383690,…	NFKBIA,NFKB1,EGR1,CD97,C3,CRP,PTX3,C2,F2,CFHR1,CD55,C4BPA,CFHR3,CFH,CD40,PROS1,CFI,CD59,MASP2,RELA,C4A,COLEC11,C4B,CFB,ITGAM
2	HSA-140877	Formation of Fibrin Clot (Clotting Cascade)	9	39	2.09	7.33e-14	9606.ENSP00000218099,9606.ENSP00000233156,9606.ENSP00000308541,9606.ENSP00000334145,9606.ENSP00000356671,9606.ENSP00000356771,9606.ENSP00000364709,9606.ENSP00000364731,9606.ENSP00000377783	F9,TFPI,F2,F3,SERPINC1,F5,F10,F7,PROS1
2	HSA-166663	Initial triggering of complement	8	22	2.28	1.47e-13	9606.ENSP00000245907,9606.ENSP00000255030,9606.ENSP00000299367,9606.ENSP00000383690,9606.ENSP00000396688,9606.ENSP00000411770,9606.ENSP00000415941,9606.ENSP00000416561	C3,CRP,C2,MASP2,C4A,COLEC11,C4B,CFB
2	hsa05150	Staphylococcus aureus infection	10	86	1.79	2.57e-13	9606.ENSP00000245907,9606.ENSP00000299367,9606.ENSP00000308938,9606.ENSP00000356399,9606.ENSP00000378130,9606.ENSP00000383690,9606.ENSP00000396688,9606.ENSP00000415941,9606.ENSP00000416561,9606.ENSP00000441691	C3,C2,PLG,CFH,CFI,MASP2,C4A,C4B,CFB,ITGAM
2	hsa05133	Pertussis	8	74	1.76	2.59e-10	9606.ENSP00000226574,9606.ENSP00000245907,9606.ENSP00000299367,9606.ENSP00000356037,9606.ENSP00000384273,9606.ENSP00000396688,9606.ENSP00000415941,9606.ENSP00000441691	NFKB1,C3,C2,C4BPA,RELA,C4A,C4B,ITGAM
2	HSA-140834	Extrinsic Pathway of Fibrin Clot Formation	5	5	2.72	1.4e-09	9606.ENSP00000218099,9606.ENSP00000233156,9606.ENSP00000334145,9606.ENSP00000364709,9606.ENSP00000364731	F9,TFPI,F3,F10,F7
2	HSA-174577	Activation of C3 and C5	5	7	2.58	3.85e-09	9606.ENSP00000245907,9606.ENSP00000299367,9606.ENSP00000396688,9606.ENSP00000415941,9606.ENSP00000416561	C3,C2,C4A,C4B,CFB
2	HSA-159763	Transport of gamma-carboxylated protein precursors from the endoplasmic reticulum to the Golgi apparatus	5	9	2.47	8.63e-09	9606.ENSP00000218099,9606.ENSP00000308541,9606.ENSP00000364709,9606.ENSP00000364731,9606.ENSP00000377783	F9,F2,F10,F7,PROS1
2	HSA-159740	Gamma-carboxylation of protein precursors	5	10	2.42	1.16e-08	9606.ENSP00000218099,9606.ENSP00000308541,9606.ENSP00000364709,9606.ENSP00000364731,9606.ENSP00000377783	F9,F2,F10,F7,PROS1
2	HSA-159782	Removal of aminoterminal propeptides from gamma-carboxylated proteins	5	10	2.42	1.16e-08	9606.ENSP00000218099,9606.ENSP00000308541,9606.ENSP00000364709,9606.ENSP00000364731,9606.ENSP00000377783	F9,F2,F10,F7,PROS1
2	HSA-109582	Hemostasis	12	605	1.02	1.28e-07	9606.ENSP00000218099,9606.ENSP00000233156,9606.ENSP00000265171,9606.ENSP00000308541,9606.ENSP00000308938,9606.ENSP00000334145,9606.ENSP00000356671,9606.ENSP00000356771,9606.ENSP00000364709,9606.ENSP00000364731,9606.ENSP00000377783,9606.ENSP00000441691	F9,TFPI,EGF,F2,PLG,F3,SERPINC1,F5,F10,F7,PROS1,ITGAM
2	HSA-140875	Common Pathway of Fibrin Clot Formation	5	22	2.08	2.2e-07	9606.ENSP00000308541,9606.ENSP00000356671,9606.ENSP00000356771,9606.ENSP00000364709,9606.ENSP00000377783	F2,SERPINC1,F5,F10,PROS1
2	HSA-140837	Intrinsic Pathway of Fibrin Clot Formation	5	23	2.06	2.49e-07	9606.ENSP00000218099,9606.ENSP00000308541,9606.ENSP00000356671,9606.ENSP00000364709,9606.ENSP00000377783	F9,F2,SERPINC1,F10,PROS1
2	hsa05134	Legionellosis	5	55	1.68	7.7e-06	9606.ENSP00000216797,9606.ENSP00000226574,9606.ENSP00000245907,9606.ENSP00000384273,9606.ENSP00000441691	NFKBIA,NFKB1,C3,RELA,ITGAM
2	HSA-381426	Regulation of Insulin-like Growth Factor (IGF) transport and uptake by Insulin-like Growth Factor Binding Proteins (IGFBPs)	6	124	1.41	1.9e-05	9606.ENSP00000245907,9606.ENSP00000308541,9606.ENSP00000308938,9606.ENSP00000356671,9606.ENSP00000356771,9606.ENSP00000396688	C3,F2,PLG,SERPINC1,F5,C4A
2	hsa05140	Leishmaniasis	5	70	1.58	1.91e-05	9606.ENSP00000216797,9606.ENSP00000226574,9606.ENSP00000245907,9606.ENSP00000384273,9606.ENSP00000441691	NFKBIA,NFKB1,C3,RELA,ITGAM
2	hsa05322	Systemic lupus erythematosus	5	93	1.45	6.06e-05	9606.ENSP00000245907,9606.ENSP00000299367,9606.ENSP00000361359,9606.ENSP00000396688,9606.ENSP00000415941	C3,C2,CD40,C4A,C4B
2	HSA-5603029	IkBA variant leads to EDA-ID	3	7	2.36	8.88e-05	9606.ENSP00000216797,9606.ENSP00000226574,9606.ENSP00000384273	NFKBIA,NFKB1,RELA
2	HSA-9662001	Defective factor VIII causes hemophilia A	3	7	2.36	8.88e-05	9606.ENSP00000218099,9606.ENSP00000308541,9606.ENSP00000364709	F9,F2,F10
2	HSA-597592	Post-translational protein modification	13	1390	0.69	9.31e-05	9606.ENSP00000216797,9606.ENSP00000218099,9606.ENSP00000245907,9606.ENSP00000308541,9606.ENSP00000356030,9606.ENSP00000356671,9606.ENSP00000356771,9606.ENSP00000364709,9606.ENSP00000364731,9606.ENSP00000377783,9606.ENSP00000379191,9606.ENSP00000384273,9606.ENSP00000396688	NFKBIA,F9,C3,F2,CD55,SERPINC1,F5,F10,F7,PROS1,CD59,RELA,C4A
2	HSA-209560	NF-kB is activated and signals survival	3	13	2.09	0.00035	9606.ENSP00000216797,9606.ENSP00000226574,9606.ENSP00000384273	NFKBIA,NFKB1,RELA
2	HSA-166786	Creation of C4 and C2 activators	3	14	2.05	0.00041	9606.ENSP00000255030,9606.ENSP00000383690,9606.ENSP00000411770	CRP,MASP2,COLEC11
2	HSA-1810476	RIP-mediated NFkB activation via ZBP1	3	17	1.97	0.00058	9606.ENSP00000216797,9606.ENSP00000226574,9606.ENSP00000384273	NFKBIA,NFKB1,RELA
2	HSA-392499	Metabolism of proteins	14	1977	0.57	0.00061	9606.ENSP00000216797,9606.ENSP00000218099,9606.ENSP00000245907,9606.ENSP00000308541,9606.ENSP00000308938,9606.ENSP00000356030,9606.ENSP00000356671,9606.ENSP00000356771,9606.ENSP00000364709,9606.ENSP00000364731,9606.ENSP00000377783,9606.ENSP00000379191,9606.ENSP00000384273,9606.ENSP00000396688	NFKBIA,F9,C3,F2,PLG,CD55,SERPINC1,F5,F10,F7,PROS1,CD59,RELA,C4A
2	hsa05235	PD-L1 expression and PD-1 checkpoint pathway in cancer	4	88	1.38	0.0013	9606.ENSP00000216797,9606.ENSP00000226574,9606.ENSP00000265171,9606.ENSP00000384273	NFKBIA,NFKB1,EGF,RELA
2	HSA-933542	TRAF6 mediated NF-kB activation	3	24	1.82	0.0013	9606.ENSP00000216797,9606.ENSP00000226574,9606.ENSP00000384273	NFKBIA,NFKB1,RELA
2	HSA-9660826	Purinergic signaling in leishmaniasis infection	3	24	1.82	0.0013	9606.ENSP00000226574,9606.ENSP00000245907,9606.ENSP00000384273	NFKB1,C3,RELA
2	hsa04064	NF-kappa B signaling pathway	4	101	1.32	0.0016	9606.ENSP00000216797,9606.ENSP00000226574,9606.ENSP00000361359,9606.ENSP00000384273	NFKBIA,NFKB1,CD40,RELA
2	hsa04620	Toll-like receptor signaling pathway	4	101	1.32	0.0016	9606.ENSP00000216797,9606.ENSP00000226574,9606.ENSP00000361359,9606.ENSP00000384273	NFKBIA,NFKB1,CD40,RELA
2	hsa04933	AGE-RAGE signaling pathway in diabetic complications	4	98	1.33	0.0016	9606.ENSP00000226574,9606.ENSP00000239938,9606.ENSP00000334145,9606.ENSP00000384273	NFKB1,EGR1,F3,RELA
2	hsa05142	Chagas disease	4	99	1.33	0.0016	9606.ENSP00000216797,9606.ENSP00000226574,9606.ENSP00000245907,9606.ENSP00000384273	NFKBIA,NFKB1,C3,RELA
2	hsa05145	Toxoplasmosis	4	105	1.3	0.0016	9606.ENSP00000216797,9606.ENSP00000226574,9606.ENSP00000361359,9606.ENSP00000384273	NFKBIA,NFKB1,CD40,RELA
2	hsa05166	Human T-cell leukemia virus 1 infection	5	211	1.1	0.0016	9606.ENSP00000216797,9606.ENSP00000226574,9606.ENSP00000239938,9606.ENSP00000361359,9606.ENSP00000384273	NFKBIA,NFKB1,EGR1,CD40,RELA
2	hsa05215	Prostate cancer	4	96	1.34	0.0016	9606.ENSP00000216797,9606.ENSP00000226574,9606.ENSP00000265171,9606.ENSP00000384273	NFKBIA,NFKB1,EGF,RELA
2	HSA-6798695	Neutrophil degranulation	7	473	0.89	0.0018	9606.ENSP00000226574,9606.ENSP00000242786,9606.ENSP00000245907,9606.ENSP00000295927,9606.ENSP00000356030,9606.ENSP00000379191,9606.ENSP00000441691	NFKB1,CD97,C3,PTX3,CD55,CD59,ITGAM
2	HSA-9672383	Defective factor IX causes thrombophilia	2	3	2.55	0.0021	9606.ENSP00000218099,9606.ENSP00000364709	F9,F10
2	HSA-9672396	Defective cofactor function of FVIIIa variant	2	3	2.55	0.0021	9606.ENSP00000218099,9606.ENSP00000364709	F9,F10
2	HSA-9673202	Defective F9 variant does not activate FX	2	3	2.55	0.0021	9606.ENSP00000218099,9606.ENSP00000364709	F9,F10
2	HSA-445989	TAK1 activates NFkB by phosphorylation and activation of IKKs complex	3	32	1.7	0.0022	9606.ENSP00000216797,9606.ENSP00000226574,9606.ENSP00000384273	NFKBIA,NFKB1,RELA
2	HSA-8957275	Post-translational protein phosphorylation	4	107	1.3	0.0031	9606.ENSP00000245907,9606.ENSP00000356671,9606.ENSP00000356771,9606.ENSP00000396688	C3,SERPINC1,F5,C4A
2	HSA-173736	Alternative complement activation	2	5	2.33	0.0039	9606.ENSP00000245907,9606.ENSP00000416561	C3,CFB
2	hsa05160	Hepatitis C	4	156	1.13	0.0051	9606.ENSP00000216797,9606.ENSP00000226574,9606.ENSP00000265171,9606.ENSP00000384273	NFKBIA,NFKB1,EGF,RELA
2	HSA-5660668	CLEC7A/inflammasome pathway	2	6	2.25	0.0051	9606.ENSP00000226574,9606.ENSP00000384273	NFKB1,RELA
2	hsa04623	Cytosolic DNA-sensing pathway	3	62	1.41	0.0052	9606.ENSP00000216797,9606.ENSP00000226574,9606.ENSP00000384273	NFKBIA,NFKB1,RELA
2	HSA-166016	Toll Like Receptor 4 (TLR4) Cascade	4	126	1.22	0.0053	9606.ENSP00000216797,9606.ENSP00000226574,9606.ENSP00000384273,9606.ENSP00000441691	NFKBIA,NFKB1,RELA,ITGAM
2	HSA-114608	Platelet degranulation	4	127	1.22	0.0054	9606.ENSP00000265171,9606.ENSP00000308938,9606.ENSP00000356771,9606.ENSP00000377783	EGF,PLG,F5,PROS1
2	hsa04622	RIG-I-like receptor signaling pathway	3	70	1.36	0.0056	9606.ENSP00000216797,9606.ENSP00000226574,9606.ENSP00000384273	NFKBIA,NFKB1,RELA
2	hsa04662	B cell receptor signaling pathway	3	78	1.31	0.0056	9606.ENSP00000216797,9606.ENSP00000226574,9606.ENSP00000384273	NFKBIA,NFKB1,RELA
2	hsa04920	Adipocytokine signaling pathway	3	69	1.36	0.0056	9606.ENSP00000216797,9606.ENSP00000226574,9606.ENSP00000384273	NFKBIA,NFKB1,RELA
2	hsa05120	Epithelial cell signaling in Helicobacter pylori infection	3	67	1.37	0.0056	9606.ENSP00000216797,9606.ENSP00000226574,9606.ENSP00000384273	NFKBIA,NFKB1,RELA
2	hsa05130	Pathogenic Escherichia coli infection	4	187	1.05	0.0056	9606.ENSP00000216797,9606.ENSP00000226574,9606.ENSP00000308541,9606.ENSP00000384273	NFKBIA,NFKB1,F2,RELA
2	hsa05152	Tuberculosis	4	168	1.1	0.0056	9606.ENSP00000226574,9606.ENSP00000245907,9606.ENSP00000384273,9606.ENSP00000441691	NFKB1,C3,RELA,ITGAM
2	hsa05164	Influenza A	4	165	1.11	0.0056	9606.ENSP00000216797,9606.ENSP00000226574,9606.ENSP00000308938,9606.ENSP00000384273	NFKBIA,NFKB1,PLG,RELA
2	hsa05167	Kaposi sarcoma-associated herpesvirus infection	4	187	1.05	0.0056	9606.ENSP00000216797,9606.ENSP00000226574,9606.ENSP00000245907,9606.ENSP00000384273	NFKBIA,NFKB1,C3,RELA
2	hsa05169	Epstein-Barr virus infection	4	193	1.04	0.0056	9606.ENSP00000216797,9606.ENSP00000226574,9606.ENSP00000361359,9606.ENSP00000384273	NFKBIA,NFKB1,CD40,RELA
2	hsa05202	Transcriptional misregulation in cancer	4	171	1.09	0.0056	9606.ENSP00000226574,9606.ENSP00000361359,9606.ENSP00000384273,9606.ENSP00000441691	NFKB1,CD40,RELA,ITGAM
2	hsa05203	Viral carcinogenesis	4	182	1.07	0.0056	9606.ENSP00000216797,9606.ENSP00000226574,9606.ENSP00000245907,9606.ENSP00000384273	NFKBIA,NFKB1,C3,RELA
2	hsa05212	Pancreatic cancer	3	73	1.34	0.0056	9606.ENSP00000226574,9606.ENSP00000265171,9606.ENSP00000384273	NFKB1,EGF,RELA
2	hsa05220	Chronic myeloid leukemia	3	75	1.33	0.0056	9606.ENSP00000216797,9606.ENSP00000226574,9606.ENSP00000384273	NFKBIA,NFKB1,RELA
2	hsa05221	Acute myeloid leukemia	3	66	1.38	0.0056	9606.ENSP00000226574,9606.ENSP00000384273,9606.ENSP00000441691	NFKB1,RELA,ITGAM
2	HSA-166662	Lectin pathway of complement activation	2	7	2.18	0.006	9606.ENSP00000383690,9606.ENSP00000411770	MASP2,COLEC11
2	HSA-3134963	DEx/H-box helicases activate type I IFN and inflammatory cytokines production	2	7	2.18	0.006	9606.ENSP00000226574,9606.ENSP00000384273	NFKB1,RELA
2	HSA-76002	Platelet activation, signaling and aggregation	5	260	1.01	0.0061	9606.ENSP00000265171,9606.ENSP00000308541,9606.ENSP00000308938,9606.ENSP00000356771,9606.ENSP00000377783	EGF,F2,PLG,F5,PROS1
2	hsa04658	Th1 and Th2 cell differentiation	3	87	1.26	0.007	9606.ENSP00000216797,9606.ENSP00000226574,9606.ENSP00000384273	NFKBIA,NFKB1,RELA
2	HSA-448706	Interleukin-1 processing	2	8	2.12	0.007	9606.ENSP00000226574,9606.ENSP00000384273	NFKB1,RELA
2	hsa04640	Hematopoietic cell lineage	3	91	1.24	0.0077	9606.ENSP00000356030,9606.ENSP00000379191,9606.ENSP00000441691	CD55,CD59,ITGAM
2	hsa04657	IL-17 signaling pathway	3	92	1.24	0.0077	9606.ENSP00000216797,9606.ENSP00000226574,9606.ENSP00000384273	NFKBIA,NFKB1,RELA
2	hsa05131	Shigellosis	4	218	0.99	0.0077	9606.ENSP00000216797,9606.ENSP00000226574,9606.ENSP00000245907,9606.ENSP00000384273	NFKBIA,NFKB1,C3,RELA
2	hsa05222	Small cell lung cancer	3	92	1.24	0.0077	9606.ENSP00000216797,9606.ENSP00000226574,9606.ENSP00000384273	NFKBIA,NFKB1,RELA
2	hsa04625	C-type lectin receptor signaling pathway	3	102	1.19	0.009	9606.ENSP00000216797,9606.ENSP00000226574,9606.ENSP00000384273	NFKBIA,NFKB1,RELA
2	hsa04659	Th17 cell differentiation	3	101	1.2	0.009	9606.ENSP00000216797,9606.ENSP00000226574,9606.ENSP00000384273	NFKBIA,NFKB1,RELA
2	hsa04660	T cell receptor signaling pathway	3	101	1.2	0.009	9606.ENSP00000216797,9606.ENSP00000226574,9606.ENSP00000384273	NFKBIA,NFKB1,RELA
2	hsa05146	Amoebiasis	3	100	1.2	0.009	9606.ENSP00000226574,9606.ENSP00000384273,9606.ENSP00000441691	NFKB1,RELA,ITGAM
2	hsa04066	HIF-1 signaling pathway	3	106	1.18	0.0095	9606.ENSP00000226574,9606.ENSP00000265171,9606.ENSP00000384273	NFKB1,EGF,RELA
2	hsa04931	Insulin resistance	3	107	1.17	0.0095	9606.ENSP00000216797,9606.ENSP00000226574,9606.ENSP00000384273	NFKBIA,NFKB1,RELA
2	HSA-4755510	SUMOylation of immune response proteins	2	10	2.02	0.0096	9606.ENSP00000216797,9606.ENSP00000384273	NFKBIA,RELA
2	hsa04668	TNF signaling pathway	3	112	1.15	0.0106	9606.ENSP00000216797,9606.ENSP00000226574,9606.ENSP00000384273	NFKBIA,NFKB1,RELA
2	hsa04722	Neurotrophin signaling pathway	3	114	1.14	0.0109	9606.ENSP00000216797,9606.ENSP00000226574,9606.ENSP00000384273	NFKBIA,NFKB1,RELA
2	HSA-193692	Regulated proteolysis of p75NTR	2	11	1.98	0.0109	9606.ENSP00000226574,9606.ENSP00000384273	NFKB1,RELA
2	HSA-1169091	Activation of NF-kappaB in B cells	3	65	1.39	0.0115	9606.ENSP00000216797,9606.ENSP00000226574,9606.ENSP00000384273	NFKBIA,NFKB1,RELA
2	hsa04380	Osteoclast differentiation	3	122	1.11	0.0128	9606.ENSP00000216797,9606.ENSP00000226574,9606.ENSP00000384273	NFKBIA,NFKB1,RELA
2	hsa01523	Antifolate resistance	2	31	1.53	0.0132	9606.ENSP00000226574,9606.ENSP00000384273	NFKB1,RELA
2	hsa05135	Yersinia infection	3	125	1.1	0.0132	9606.ENSP00000216797,9606.ENSP00000226574,9606.ENSP00000384273	NFKBIA,NFKB1,RELA
2	hsa04926	Relaxin signaling pathway	3	128	1.09	0.0137	9606.ENSP00000216797,9606.ENSP00000226574,9606.ENSP00000384273	NFKBIA,NFKB1,RELA
2	hsa04210	Apoptosis	3	132	1.08	0.0146	9606.ENSP00000216797,9606.ENSP00000226574,9606.ENSP00000384273	NFKBIA,NFKB1,RELA
2	hsa05162	Measles	3	138	1.06	0.0162	9606.ENSP00000216797,9606.ENSP00000226574,9606.ENSP00000384273	NFKBIA,NFKB1,RELA
2	hsa04145	Phagosome	3	142	1.05	0.0172	9606.ENSP00000245907,9606.ENSP00000411770,9606.ENSP00000441691	C3,COLEC11,ITGAM
2	HSA-844456	The NLRP3 inflammasome	2	15	1.85	0.018	9606.ENSP00000226574,9606.ENSP00000384273	NFKB1,RELA
2	hsa05200	Pathways in cancer	5	517	0.71	0.0187	9606.ENSP00000216797,9606.ENSP00000226574,9606.ENSP00000265171,9606.ENSP00000308541,9606.ENSP00000384273	NFKBIA,NFKB1,EGF,F2,RELA
2	HSA-2871837	FCERI mediated NF-kB activation	3	80	1.3	0.0192	9606.ENSP00000216797,9606.ENSP00000226574,9606.ENSP00000384273	NFKBIA,NFKB1,RELA
2	hsa04080	Neuroactive ligand-receptor interaction	4	330	0.81	0.0226	9606.ENSP00000245907,9606.ENSP00000308541,9606.ENSP00000308938,9606.ENSP00000436607	C3,F2,PLG,ADM
2	hsa05161	Hepatitis B	3	159	1	0.0226	9606.ENSP00000216797,9606.ENSP00000226574,9606.ENSP00000384273	NFKBIA,NFKB1,RELA
2	HSA-202424	Downstream TCR signaling	3	91	1.24	0.025	9606.ENSP00000216797,9606.ENSP00000226574,9606.ENSP00000384273	NFKBIA,NFKB1,RELA
2	HSA-373080	Class B/2 (Secretin family receptors)	3	94	1.23	0.0258	9606.ENSP00000242786,9606.ENSP00000356030,9606.ENSP00000436607	CD97,CD55,ADM
2	HSA-5607764	CLEC7A (Dectin-1) signaling	3	96	1.22	0.0258	9606.ENSP00000216797,9606.ENSP00000226574,9606.ENSP00000384273	NFKBIA,NFKB1,RELA
2	HSA-5621575	CD209 (DC-SIGN) signaling	2	21	1.7	0.0258	9606.ENSP00000226574,9606.ENSP00000384273	NFKB1,RELA
2	hsa05030	Cocaine addiction	2	49	1.33	0.0259	9606.ENSP00000226574,9606.ENSP00000384273	NFKB1,RELA
2	hsa04621	NOD-like receptor signaling pathway	3	174	0.96	0.0274	9606.ENSP00000216797,9606.ENSP00000226574,9606.ENSP00000384273	NFKBIA,NFKB1,RELA
2	hsa05416	Viral myocarditis	2	55	1.28	0.0311	9606.ENSP00000356030,9606.ENSP00000361359	CD55,CD40
2	hsa04062	Chemokine signaling pathway	3	186	0.93	0.0318	9606.ENSP00000216797,9606.ENSP00000226574,9606.ENSP00000384273	NFKBIA,NFKB1,RELA
2	HSA-9658195	Leishmania infection	4	249	0.93	0.0343	9606.ENSP00000226574,9606.ENSP00000245907,9606.ENSP00000384273,9606.ENSP00000436607	NFKB1,C3,RELA,ADM
2	hsa05321	Inflammatory bowel disease	2	60	1.25	0.0354	9606.ENSP00000226574,9606.ENSP00000384273	NFKB1,RELA
2	hsa05170	Human immunodeficiency virus 1 infection	3	204	0.89	0.0394	9606.ENSP00000216797,9606.ENSP00000226574,9606.ENSP00000384273	NFKBIA,NFKB1,RELA
2	hsa04024	cAMP signaling pathway	3	208	0.88	0.0409	9606.ENSP00000216797,9606.ENSP00000226574,9606.ENSP00000384273	NFKBIA,NFKB1,RELA
2	hsa04810	Regulation of actin cytoskeleton	3	209	0.88	0.0409	9606.ENSP00000265171,9606.ENSP00000308541,9606.ENSP00000441691	EGF,F2,ITGAM
2	hsa05132	Salmonella infection	3	209	0.88	0.0409	9606.ENSP00000216797,9606.ENSP00000226574,9606.ENSP00000384273	NFKBIA,NFKB1,RELA
2	hsa04917	Prolactin signaling pathway	2	69	1.19	0.0423	9606.ENSP00000226574,9606.ENSP00000384273	NFKB1,RELA
2	HSA-500792	GPCR ligand binding	5	455	0.76	0.0427	9606.ENSP00000242786,9606.ENSP00000245907,9606.ENSP00000308541,9606.ENSP00000356030,9606.ENSP00000436607	CD97,C3,F2,CD55,ADM
2	HSA-1280215	Cytokine Signaling in Immune system	6	681	0.67	0.0431	9606.ENSP00000216797,9606.ENSP00000226574,9606.ENSP00000239938,9606.ENSP00000361359,9606.ENSP00000384273,9606.ENSP00000441691	NFKBIA,NFKB1,EGR1,CD40,RELA,ITGAM
2	hsa05163	Human cytomegalovirus infection	3	218	0.86	0.0435	9606.ENSP00000216797,9606.ENSP00000226574,9606.ENSP00000384273	NFKBIA,NFKB1,RELA
2	hsa04014	Ras signaling pathway	3	226	0.85	0.0472	9606.ENSP00000226574,9606.ENSP00000265171,9606.ENSP00000384273	NFKB1,EGF,RELA
3	hsa04614	Renin-angiotensin system	8	23	2.66	3.16e-17	9606.ENSP00000272190,9606.ENSP00000290866,9606.ENSP00000355627,9606.ENSP00000360973,9606.ENSP00000377055,9606.ENSP00000389326,9606.ENSP00000418525,9606.ENSP00000419422	REN,ACE,AGT,AGTR2,PRCP,ACE2,MME,AGTR1
3	HSA-2022377	Metabolism of Angiotensinogen to Angiotensins	5	18	2.56	9.08e-09	9606.ENSP00000272190,9606.ENSP00000290866,9606.ENSP00000355627,9606.ENSP00000389326,9606.ENSP00000418525	REN,ACE,AGT,ACE2,MME
3	hsa04974	Protein digestion and absorption	6	100	1.89	1.76e-08	9606.ENSP00000230588,9606.ENSP00000305302,9606.ENSP00000353731,9606.ENSP00000377055,9606.ENSP00000389326,9606.ENSP00000418525	MEP1A,SLC6A19,DPP4,PRCP,ACE2,MME
3	HSA-2980736	Peptide hormone metabolism	6	87	1.95	5.12e-08	9606.ENSP00000272190,9606.ENSP00000290866,9606.ENSP00000353731,9606.ENSP00000355627,9606.ENSP00000389326,9606.ENSP00000418525	REN,ACE,DPP4,AGT,ACE2,MME
3	hsa04924	Renin secretion	4	66	1.9	2.22e-05	9606.ENSP00000272190,9606.ENSP00000290866,9606.ENSP00000355627,9606.ENSP00000419422	REN,ACE,AGT,AGTR1
3	hsa04080	Neuroactive ligand-receptor interaction	4	330	1.2	0.0082	9606.ENSP00000265023,9606.ENSP00000355627,9606.ENSP00000360973,9606.ENSP00000419422	KNG1,AGT,AGTR2,AGTR1
3	HSA-375276	Peptide ligand-binding receptors	4	193	1.43	0.009	9606.ENSP00000265023,9606.ENSP00000355627,9606.ENSP00000360973,9606.ENSP00000419422	KNG1,AGT,AGTR2,AGTR1
3	hsa04270	Vascular smooth muscle contraction	3	133	1.47	0.0094	9606.ENSP00000355627,9606.ENSP00000400175,9606.ENSP00000419422	AGT,RHOA,AGTR1
3	hsa04022	cGMP-PKG signaling pathway	3	162	1.38	0.0105	9606.ENSP00000265023,9606.ENSP00000400175,9606.ENSP00000419422	KNG1,RHOA,AGTR1
3	hsa04072	Phospholipase D signaling pathway	3	147	1.43	0.0105	9606.ENSP00000355627,9606.ENSP00000400175,9606.ENSP00000419422	AGT,RHOA,AGTR1
3	hsa04261	Adrenergic signaling in cardiomyocytes	3	147	1.43	0.0105	9606.ENSP00000355627,9606.ENSP00000360973,9606.ENSP00000419422	AGT,AGTR2,AGTR1
3	HSA-392499	Metabolism of proteins	8	1977	0.72	0.0163	9606.ENSP00000265023,9606.ENSP00000272190,9606.ENSP00000290866,9606.ENSP00000353731,9606.ENSP00000355627,9606.ENSP00000389326,9606.ENSP00000400175,9606.ENSP00000418525	KNG1,REN,ACE,DPP4,AGT,ACE2,RHOA,MME
3	HSA-5666185	RHO GTPases Activate Rhotekin and Rhophilins	2	9	2.46	0.0163	9606.ENSP00000285735,9606.ENSP00000400175	RHOC,RHOA
3	hsa05200	Pathways in cancer	4	517	1	0.02	9606.ENSP00000265023,9606.ENSP00000355627,9606.ENSP00000400175,9606.ENSP00000419422	KNG1,AGT,RHOA,AGTR1
3	HSA-140837	Intrinsic Pathway of Fibrin Clot Formation	2	23	2.05	0.0326	9606.ENSP00000265023,9606.ENSP00000377055	KNG1,PRCP
3	HSA-388396	GPCR downstream signalling	6	1094	0.85	0.0326	9606.ENSP00000265023,9606.ENSP00000285735,9606.ENSP00000355627,9606.ENSP00000360973,9606.ENSP00000400175,9606.ENSP00000419422	KNG1,RHOC,AGT,AGTR2,RHOA,AGTR1
3	HSA-416572	Sema4D induced cell migration and growth-cone collapse	2	20	2.12	0.0326	9606.ENSP00000285735,9606.ENSP00000400175	RHOC,RHOA
3	HSA-5625900	RHO GTPases activate CIT	2	19	2.14	0.0326	9606.ENSP00000285735,9606.ENSP00000400175	RHOC,RHOA
3	HSA-5627117	RHO GTPases Activate ROCKs	2	19	2.14	0.0326	9606.ENSP00000285735,9606.ENSP00000400175	RHOC,RHOA
3	hsa04927	Cortisol synthesis and secretion	2	65	1.6	0.0395	9606.ENSP00000355627,9606.ENSP00000419422	AGT,AGTR1
4	HSA-9013694	Signaling by NOTCH4	11	80	2.39	2.54e-23	9606.ENSP00000232424,9606.ENSP00000281708,9606.ENSP00000292599,9606.ENSP00000294785,9606.ENSP00000326366,9606.ENSP00000338272,9606.ENSP00000345206,9606.ENSP00000357348,9606.ENSP00000364163,9606.ENSP00000367714,9606.ENSP00000421180	HES1,FBXW7,MAML1,NCSTN,PSEN1,HEY1,RBPJ,HEY2,NOTCH4,HES5,MAML3
4	hsa04330	Notch signaling pathway	10	52	2.53	1.74e-22	9606.ENSP00000232424,9606.ENSP00000292599,9606.ENSP00000294785,9606.ENSP00000326366,9606.ENSP00000338272,9606.ENSP00000345206,9606.ENSP00000357348,9606.ENSP00000364163,9606.ENSP00000367714,9606.ENSP00000421180	HES1,MAML1,NCSTN,PSEN1,HEY1,RBPJ,HEY2,NOTCH4,HES5,MAML3
4	HSA-2644606	Constitutive Signaling by NOTCH1 PEST Domain Mutants	10	58	2.49	1.52e-21	9606.ENSP00000232424,9606.ENSP00000281708,9606.ENSP00000292599,9606.ENSP00000294785,9606.ENSP00000326366,9606.ENSP00000338272,9606.ENSP00000345206,9606.ENSP00000357348,9606.ENSP00000367714,9606.ENSP00000421180	HES1,FBXW7,MAML1,NCSTN,PSEN1,HEY1,RBPJ,HEY2,HES5,MAML3
4	HSA-2894862	Constitutive Signaling by NOTCH1 HD+PEST Domain Mutants	10	58	2.49	1.52e-21	9606.ENSP00000232424,9606.ENSP00000281708,9606.ENSP00000292599,9606.ENSP00000294785,9606.ENSP00000326366,9606.ENSP00000338272,9606.ENSP00000345206,9606.ENSP00000357348,9606.ENSP00000367714,9606.ENSP00000421180	HES1,FBXW7,MAML1,NCSTN,PSEN1,HEY1,RBPJ,HEY2,HES5,MAML3
4	HSA-1980143	Signaling by NOTCH1	10	74	2.38	4.13e-21	9606.ENSP00000232424,9606.ENSP00000281708,9606.ENSP00000292599,9606.ENSP00000294785,9606.ENSP00000326366,9606.ENSP00000338272,9606.ENSP00000345206,9606.ENSP00000357348,9606.ENSP00000367714,9606.ENSP00000421180	HES1,FBXW7,MAML1,NCSTN,PSEN1,HEY1,RBPJ,HEY2,HES5,MAML3
4	HSA-9012852	Signaling by NOTCH3	9	49	2.51	1.21e-19	9606.ENSP00000232424,9606.ENSP00000292599,9606.ENSP00000294785,9606.ENSP00000326366,9606.ENSP00000338272,9606.ENSP00000345206,9606.ENSP00000357348,9606.ENSP00000367714,9606.ENSP00000421180	HES1,MAML1,NCSTN,PSEN1,HEY1,RBPJ,HEY2,HES5,MAML3
4	HSA-9013695	NOTCH4 Intracellular Domain Regulates Transcription	8	20	2.85	2.08e-19	9606.ENSP00000232424,9606.ENSP00000292599,9606.ENSP00000338272,9606.ENSP00000345206,9606.ENSP00000357348,9606.ENSP00000364163,9606.ENSP00000367714,9606.ENSP00000421180	HES1,MAML1,HEY1,RBPJ,HEY2,NOTCH4,HES5,MAML3
4	HSA-2122947	NOTCH1 Intracellular Domain Regulates Transcription	8	48	2.47	8.6e-17	9606.ENSP00000232424,9606.ENSP00000281708,9606.ENSP00000292599,9606.ENSP00000338272,9606.ENSP00000345206,9606.ENSP00000357348,9606.ENSP00000367714,9606.ENSP00000421180	HES1,FBXW7,MAML1,HEY1,RBPJ,HEY2,HES5,MAML3
4	HSA-9013508	NOTCH3 Intracellular Domain Regulates Transcription	7	25	2.7	9.16e-16	9606.ENSP00000232424,9606.ENSP00000292599,9606.ENSP00000338272,9606.ENSP00000345206,9606.ENSP00000357348,9606.ENSP00000367714,9606.ENSP00000421180	HES1,MAML1,HEY1,RBPJ,HEY2,HES5,MAML3
4	HSA-1980145	Signaling by NOTCH2	7	33	2.58	4.68e-15	9606.ENSP00000232424,9606.ENSP00000292599,9606.ENSP00000294785,9606.ENSP00000326366,9606.ENSP00000345206,9606.ENSP00000367714,9606.ENSP00000421180	HES1,MAML1,NCSTN,PSEN1,RBPJ,HES5,MAML3
4	hsa05165	Human papillomavirus infection	9	325	1.69	9.87e-13	9606.ENSP00000232424,9606.ENSP00000292599,9606.ENSP00000326366,9606.ENSP00000338272,9606.ENSP00000345206,9606.ENSP00000357348,9606.ENSP00000364163,9606.ENSP00000367714,9606.ENSP00000421180	HES1,MAML1,PSEN1,HEY1,RBPJ,HEY2,NOTCH4,HES5,MAML3
4	HSA-2197563	NOTCH2 intracellular domain regulates transcription	5	12	2.87	1.72e-11	9606.ENSP00000232424,9606.ENSP00000292599,9606.ENSP00000345206,9606.ENSP00000367714,9606.ENSP00000421180	HES1,MAML1,RBPJ,HES5,MAML3
4	HSA-1643685	Disease	11	1548	1.1	1.07e-10	9606.ENSP00000232424,9606.ENSP00000281708,9606.ENSP00000292599,9606.ENSP00000294785,9606.ENSP00000326366,9606.ENSP00000338272,9606.ENSP00000345206,9606.ENSP00000357348,9606.ENSP00000364163,9606.ENSP00000367714,9606.ENSP00000421180	HES1,FBXW7,MAML1,NCSTN,PSEN1,HEY1,RBPJ,HEY2,NOTCH4,HES5,MAML3
4	HSA-8941856	RUNX3 regulates NOTCH signaling	4	14	2.71	2.1e-08	9606.ENSP00000232424,9606.ENSP00000292599,9606.ENSP00000345206,9606.ENSP00000421180	HES1,MAML1,RBPJ,MAML3
4	HSA-210744	Regulation of gene expression in late stage (branching morphogenesis) pancreatic bud precursor cells	4	16	2.65	3.14e-08	9606.ENSP00000232424,9606.ENSP00000292599,9606.ENSP00000345206,9606.ENSP00000421180	HES1,MAML1,RBPJ,MAML3
4	HSA-350054	Notch-HLH transcription pathway	4	28	2.41	2.09e-07	9606.ENSP00000292599,9606.ENSP00000345206,9606.ENSP00000364163,9606.ENSP00000421180	MAML1,RBPJ,NOTCH4,MAML3
4	hsa05224	Breast cancer	5	145	1.79	1.23e-06	9606.ENSP00000232424,9606.ENSP00000338272,9606.ENSP00000357348,9606.ENSP00000364163,9606.ENSP00000367714	HES1,HEY1,HEY2,NOTCH4,HES5
4	HSA-212436	Generic Transcription Pathway	8	1197	1.08	2.78e-06	9606.ENSP00000232424,9606.ENSP00000281708,9606.ENSP00000292599,9606.ENSP00000338272,9606.ENSP00000345206,9606.ENSP00000357348,9606.ENSP00000364163,9606.ENSP00000421180	HES1,FBXW7,MAML1,HEY1,RBPJ,HEY2,NOTCH4,MAML3
4	HSA-1912408	Pre-NOTCH Transcription and Translation	4	62	2.06	3.61e-06	9606.ENSP00000292599,9606.ENSP00000345206,9606.ENSP00000364163,9606.ENSP00000421180	MAML1,RBPJ,NOTCH4,MAML3
4	HSA-9013700	NOTCH4 Activation and Transmission of Signal to the Nucleus	3	11	2.69	4.33e-06	9606.ENSP00000294785,9606.ENSP00000326366,9606.ENSP00000364163	NCSTN,PSEN1,NOTCH4
4	HSA-8940973	RUNX2 regulates osteoblast differentiation	3	24	2.35	2.87e-05	9606.ENSP00000232424,9606.ENSP00000338272,9606.ENSP00000357348	HES1,HEY1,HEY2
4	HSA-8878166	Transcriptional regulation by RUNX2	4	118	1.78	3.32e-05	9606.ENSP00000232424,9606.ENSP00000281708,9606.ENSP00000338272,9606.ENSP00000357348	HES1,FBXW7,HEY1,HEY2
4	hsa05200	Pathways in cancer	5	517	1.24	0.00045	9606.ENSP00000232424,9606.ENSP00000338272,9606.ENSP00000357348,9606.ENSP00000364163,9606.ENSP00000367714	HES1,HEY1,HEY2,NOTCH4,HES5
4	HSA-1266738	Developmental Biology	6	1087	0.99	0.00073	9606.ENSP00000232424,9606.ENSP00000292599,9606.ENSP00000294785,9606.ENSP00000326366,9606.ENSP00000345206,9606.ENSP00000421180	HES1,MAML1,NCSTN,PSEN1,RBPJ,MAML3
4	HSA-9017802	Noncanonical activation of NOTCH3	2	8	2.65	0.00085	9606.ENSP00000294785,9606.ENSP00000326366	NCSTN,PSEN1
4	hsa04658	Th1 and Th2 cell differentiation	3	87	1.79	0.001	9606.ENSP00000292599,9606.ENSP00000345206,9606.ENSP00000421180	MAML1,RBPJ,MAML3
4	HSA-193692	Regulated proteolysis of p75NTR	2	11	2.51	0.0014	9606.ENSP00000294785,9606.ENSP00000326366	NCSTN,PSEN1
4	HSA-205043	NRIF signals cell death from the nucleus	2	16	2.35	0.0027	9606.ENSP00000294785,9606.ENSP00000326366	NCSTN,PSEN1
4	HSA-2979096	NOTCH2 Activation and Transmission of Signal to the Nucleus	2	22	2.21	0.0047	9606.ENSP00000294785,9606.ENSP00000326366	NCSTN,PSEN1
4	HSA-2122948	Activated NOTCH1 Transmits Signal to the Nucleus	2	31	2.06	0.0086	9606.ENSP00000294785,9606.ENSP00000326366	NCSTN,PSEN1
4	HSA-1251985	Nuclear signaling by ERBB4	2	32	2.05	0.0089	9606.ENSP00000294785,9606.ENSP00000326366	NCSTN,PSEN1
4	HSA-3928665	EPH-ephrin mediated repulsion of cells	2	51	1.84	0.0211	9606.ENSP00000294785,9606.ENSP00000326366	NCSTN,PSEN1
4	HSA-9604323	Negative regulation of NOTCH4 signaling	2	52	1.84	0.0214	9606.ENSP00000281708,9606.ENSP00000364163	FBXW7,NOTCH4
5	HSA-373760	L1CAM interactions	5	119	1.87	6.08e-06	9606.ENSP00000280772,9606.ENSP00000322460,9606.ENSP00000345731,9606.ENSP00000396915,9606.ENSP00000410257	ANK3,SCN4B,DLG1,SCN1B,SCN5A
5	HSA-445095	Interaction between L1 and Ankyrins	4	31	2.36	6.08e-06	9606.ENSP00000280772,9606.ENSP00000322460,9606.ENSP00000396915,9606.ENSP00000410257	ANK3,SCN4B,SCN1B,SCN5A
5	HSA-5576892	Phase 0 - rapid depolarisation	4	32	2.35	6.08e-06	9606.ENSP00000291295,9606.ENSP00000322460,9606.ENSP00000396915,9606.ENSP00000410257	CALM3,SCN4B,SCN1B,SCN5A
5	HSA-397014	Muscle contraction	5	193	1.66	2.4e-05	9606.ENSP00000291295,9606.ENSP00000322460,9606.ENSP00000354923,9606.ENSP00000396915,9606.ENSP00000410257	CALM3,SCN4B,DMD,SCN1B,SCN5A
5	HSA-1266738	Developmental Biology	6	1087	0.99	0.0029	9606.ENSP00000070846,9606.ENSP00000280772,9606.ENSP00000322460,9606.ENSP00000345731,9606.ENSP00000396915,9606.ENSP00000410257	PKP2,ANK3,SCN4B,DLG1,SCN1B,SCN5A
5	hsa05412	Arrhythmogenic right ventricular cardiomyopathy	3	76	1.85	0.0034	9606.ENSP00000070846,9606.ENSP00000282561,9606.ENSP00000354923	PKP2,GJA1,DMD
5	HSA-451308	Activation of Ca-permeable Kainate Receptor	2	10	2.55	0.0046	9606.ENSP00000291295,9606.ENSP00000345731	CALM3,DLG1
5	hsa04261	Adrenergic signaling in cardiomyocytes	3	147	1.56	0.0117	9606.ENSP00000322460,9606.ENSP00000396915,9606.ENSP00000410257	SCN4B,SCN1B,SCN5A
5	HSA-442982	Ras activation upon Ca2+ influx through NMDA receptor	2	20	2.25	0.013	9606.ENSP00000291295,9606.ENSP00000345731	CALM3,DLG1
5	HSA-438066	Unblocking of NMDA receptors, glutamate binding and activation	2	21	2.23	0.0131	9606.ENSP00000291295,9606.ENSP00000345731	CALM3,DLG1
5	HSA-9617324	Negative regulation of NMDA receptor-mediated neuronal transmission	2	21	2.23	0.0131	9606.ENSP00000291295,9606.ENSP00000345731	CALM3,DLG1
5	HSA-9620244	Long-term potentiation	2	23	2.19	0.0133	9606.ENSP00000291295,9606.ENSP00000345731	CALM3,DLG1
6	HSA-5368286	Mitochondrial translation initiation	11	88	2.35	6.77e-23	9606.ENSP00000245539,9606.ENSP00000259873,9606.ENSP00000272418,9606.ENSP00000315397,9606.ENSP00000317376,9606.ENSP00000362208,9606.ENSP00000376732,9606.ENSP00000382250,9606.ENSP00000426941,9606.ENSP00000449884,9606.ENSP00000461930	MRPS7,MRPS18B,MRPS5,MRPS31,MRPS11,MRPS15,MRPS33,MRPS6,MRPS27,MRPL42,MRPS21
6	HSA-5389840	Mitochondrial translation elongation	11	88	2.35	6.77e-23	9606.ENSP00000245539,9606.ENSP00000259873,9606.ENSP00000272418,9606.ENSP00000315397,9606.ENSP00000317376,9606.ENSP00000362208,9606.ENSP00000376732,9606.ENSP00000382250,9606.ENSP00000426941,9606.ENSP00000449884,9606.ENSP00000461930	MRPS7,MRPS18B,MRPS5,MRPS31,MRPS11,MRPS15,MRPS33,MRPS6,MRPS27,MRPL42,MRPS21
6	HSA-5419276	Mitochondrial translation termination	11	88	2.35	6.77e-23	9606.ENSP00000245539,9606.ENSP00000259873,9606.ENSP00000272418,9606.ENSP00000315397,9606.ENSP00000317376,9606.ENSP00000362208,9606.ENSP00000376732,9606.ENSP00000382250,9606.ENSP00000426941,9606.ENSP00000449884,9606.ENSP00000461930	MRPS7,MRPS18B,MRPS5,MRPS31,MRPS11,MRPS15,MRPS33,MRPS6,MRPS27,MRPL42,MRPS21
6	hsa03010	Ribosome	6	130	1.91	1.52e-08	9606.ENSP00000245539,9606.ENSP00000272418,9606.ENSP00000317376,9606.ENSP00000362208,9606.ENSP00000382250,9606.ENSP00000461930	MRPS7,MRPS5,MRPS11,MRPS15,MRPS6,MRPS21
7	HSA-5620922	BBSome-mediated cargo-targeting to cilium	11	22	2.95	1.04e-28	9606.ENSP00000242067,9606.ENSP00000245157,9606.ENSP00000249016,9606.ENSP00000249373,9606.ENSP00000264499,9606.ENSP00000268057,9606.ENSP00000295240,9606.ENSP00000296135,9606.ENSP00000317469,9606.ENSP00000480971,9606.ENSP00000482306	BBS9,BBS2,MCHR1,SMO,BBS7,BBS4,BBS5,LZTFL1,BBS1,SSTR3,TTC8
8	HSA-198933	Immunoregulatory interactions between a Lymphoid and a non-Lymphoid cell	10	129	2.14	5.56e-18	9606.ENSP00000235933,9606.ENSP00000315997,9606.ENSP00000339634,9606.ENSP00000371333,9606.ENSP00000375608,9606.ENSP00000375629,9606.ENSP00000386559,9606.ENSP00000412927,9606.ENSP00000438038,9606.ENSP00000452780	CD160,LILRB1,KIR2DL4,KLRD1,KIR3DL1,LILRB2,CD8A,HLA-G,KLRC1,B2M
8	hsa04612	Antigen processing and presentation	6	63	2.23	2.35e-10	9606.ENSP00000371333,9606.ENSP00000375608,9606.ENSP00000386559,9606.ENSP00000412927,9606.ENSP00000438038,9606.ENSP00000452780	KLRD1,KIR3DL1,CD8A,HLA-G,KLRC1,B2M
8	hsa05332	Graft-versus-host disease	4	36	2.3	8.2e-07	9606.ENSP00000371333,9606.ENSP00000375608,9606.ENSP00000412927,9606.ENSP00000438038	KLRD1,KIR3DL1,HLA-G,KLRC1
8	hsa04650	Natural killer cell mediated cytotoxicity	4	121	1.77	5.65e-05	9606.ENSP00000371333,9606.ENSP00000375608,9606.ENSP00000412927,9606.ENSP00000438038	KLRD1,KIR3DL1,HLA-G,KLRC1
8	HSA-1236977	Endosomal/Vacuolar pathway	2	11	2.51	0.0121	9606.ENSP00000412927,9606.ENSP00000452780	HLA-G,B2M
8	HSA-983170	Antigen Presentation: Folding, assembly and peptide loading of class I MHC	2	25	2.15	0.0434	9606.ENSP00000412927,9606.ENSP00000452780	HLA-G,B2M
8	HSA-2424491	DAP12 signaling	2	28	2.1	0.0448	9606.ENSP00000371333,9606.ENSP00000452780	KLRD1,B2M
9	HSA-8982491	Glycogen metabolism	10	27	2.82	3.66e-24	9606.ENSP00000164139,9606.ENSP00000216962,9606.ENSP00000238994,9606.ENSP00000261195,9606.ENSP00000294724,9606.ENSP00000317904,9606.ENSP00000338703,9606.ENSP00000340736,9606.ENSP00000345464,9606.ENSP00000410833	PYGM,PYGB,PPP1R3C,GYS2,AGL,GYS1,UGP2,GYG1,NHLRC1,GBE1
9	hsa00500	Starch and sucrose metabolism	8	32	2.65	7.94e-18	9606.ENSP00000164139,9606.ENSP00000216962,9606.ENSP00000261195,9606.ENSP00000294724,9606.ENSP00000317904,9606.ENSP00000338703,9606.ENSP00000340736,9606.ENSP00000410833	PYGM,PYGB,GYS2,AGL,GYS1,UGP2,GYG1,GBE1
9	HSA-3322077	Glycogen synthesis	7	16	2.89	4.01e-16	9606.ENSP00000238994,9606.ENSP00000261195,9606.ENSP00000317904,9606.ENSP00000338703,9606.ENSP00000340736,9606.ENSP00000345464,9606.ENSP00000410833	PPP1R3C,GYS2,GYS1,UGP2,GYG1,NHLRC1,GBE1
9	HSA-3229121	Glycogen storage diseases	6	16	2.82	2.39e-13	9606.ENSP00000238994,9606.ENSP00000261195,9606.ENSP00000317904,9606.ENSP00000340736,9606.ENSP00000345464,9606.ENSP00000410833	PPP1R3C,GYS2,GYS1,GYG1,NHLRC1,GBE1
9	HSA-3785653	Myoclonic epilepsy of Lafora	4	9	2.9	1.39e-08	9606.ENSP00000238994,9606.ENSP00000317904,9606.ENSP00000340736,9606.ENSP00000345464	PPP1R3C,GYS1,GYG1,NHLRC1
9	HSA-70221	Glycogen breakdown (glycogenolysis)	4	15	2.68	6.46e-08	9606.ENSP00000164139,9606.ENSP00000216962,9606.ENSP00000294724,9606.ENSP00000340736	PYGM,PYGB,AGL,GYG1
9	hsa04931	Insulin resistance	5	107	1.92	4.23e-07	9606.ENSP00000164139,9606.ENSP00000216962,9606.ENSP00000238994,9606.ENSP00000261195,9606.ENSP00000317904	PYGM,PYGB,PPP1R3C,GYS2,GYS1
9	hsa04910	Insulin signaling pathway	5	133	1.83	8.09e-07	9606.ENSP00000164139,9606.ENSP00000216962,9606.ENSP00000238994,9606.ENSP00000261195,9606.ENSP00000317904	PYGM,PYGB,PPP1R3C,GYS2,GYS1
9	hsa01100	Metabolic pathways	8	1447	0.99	1.03e-05	9606.ENSP00000164139,9606.ENSP00000216962,9606.ENSP00000261195,9606.ENSP00000294724,9606.ENSP00000317904,9606.ENSP00000338703,9606.ENSP00000340736,9606.ENSP00000410833	PYGM,PYGB,GYS2,AGL,GYS1,UGP2,GYG1,GBE1
9	hsa04922	Glucagon signaling pathway	4	101	1.85	1.68e-05	9606.ENSP00000164139,9606.ENSP00000216962,9606.ENSP00000261195,9606.ENSP00000317904	PYGM,PYGB,GYS2,GYS1
9	HSA-3814836	Glycogen storage disease type XV (GYG1)	2	2	3.25	0.00037	9606.ENSP00000317904,9606.ENSP00000340736	GYS1,GYG1
9	HSA-3828062	Glycogen storage disease type 0 (muscle GYS1)	2	2	3.25	0.00037	9606.ENSP00000317904,9606.ENSP00000340736	GYS1,GYG1
9	HSA-3878781	Glycogen storage disease type IV (GBE1)	2	3	3.07	0.00052	9606.ENSP00000261195,9606.ENSP00000410833	GYS2,GBE1
10	hsa04724	Glutamatergic synapse	6	111	1.98	6.06e-09	9606.ENSP00000286548,9606.ENSP00000305632,9606.ENSP00000306138,9606.ENSP00000334382,9606.ENSP00000354896,9606.ENSP00000382428	GNAQ,HOMER2,GRM5,HOMER1,GRM1,DLG4
10	HSA-6794361	Neurexins and neuroligins	5	55	2.21	2.26e-07	9606.ENSP00000305632,9606.ENSP00000306138,9606.ENSP00000334382,9606.ENSP00000354896,9606.ENSP00000382428	HOMER2,GRM5,HOMER1,GRM1,DLG4
10	hsa04720	Long-term potentiation	3	64	1.92	0.001	9606.ENSP00000286548,9606.ENSP00000306138,9606.ENSP00000354896	GNAQ,GRM5,GRM1
10	HSA-420499	Class C/3 (Metabotropic glutamate/pheromone receptors)	3	39	2.14	0.0011	9606.ENSP00000306138,9606.ENSP00000354896,9606.ENSP00000420194	GRM5,GRM1,CASR
10	hsa04540	Gap junction	3	87	1.79	0.0017	9606.ENSP00000286548,9606.ENSP00000306138,9606.ENSP00000354896	GNAQ,GRM5,GRM1
10	HSA-416476	G alpha (q) signalling events	4	214	1.52	0.002	9606.ENSP00000286548,9606.ENSP00000306138,9606.ENSP00000354896,9606.ENSP00000420194	GNAQ,GRM5,GRM1,CASR
10	hsa04068	FoxO signaling pathway	3	127	1.62	0.0038	9606.ENSP00000305632,9606.ENSP00000334382,9606.ENSP00000354896	HOMER2,HOMER1,GRM1
10	hsa04723	Retrograde endocannabinoid signaling	3	145	1.57	0.0038	9606.ENSP00000286548,9606.ENSP00000306138,9606.ENSP00000354896	GNAQ,GRM5,GRM1
10	hsa04915	Estrogen signaling pathway	3	133	1.6	0.0038	9606.ENSP00000286548,9606.ENSP00000354896,9606.ENSP00000405330	GNAQ,GRM1,ESR1
10	hsa04020	Calcium signaling pathway	3	193	1.44	0.0074	9606.ENSP00000286548,9606.ENSP00000306138,9606.ENSP00000354896	GNAQ,GRM5,GRM1
10	hsa04961	Endocrine and other factor-regulated calcium reabsorption	2	53	1.83	0.0176	9606.ENSP00000286548,9606.ENSP00000405330	GNAQ,ESR1
10	hsa04730	Long-term depression	2	59	1.78	0.0193	9606.ENSP00000286548,9606.ENSP00000354896	GNAQ,GRM1
10	hsa05016	Huntington disease	3	298	1.25	0.0193	9606.ENSP00000286548,9606.ENSP00000306138,9606.ENSP00000382428	GNAQ,GRM5,DLG4
10	hsa04928	Parathyroid hormone synthesis, secretion and action	2	103	1.54	0.0464	9606.ENSP00000286548,9606.ENSP00000420194	GNAQ,CASR
11	hsa04724	Glutamatergic synapse	6	111	1.98	6.06e-09	9606.ENSP00000286548,9606.ENSP00000305632,9606.ENSP00000306138,9606.ENSP00000334382,9606.ENSP00000354896,9606.ENSP00000382428	GNAQ,HOMER2,GRM5,HOMER1,GRM1,DLG4
11	HSA-6794361	Neurexins and neuroligins	5	55	2.21	2.26e-07	9606.ENSP00000305632,9606.ENSP00000306138,9606.ENSP00000334382,9606.ENSP00000354896,9606.ENSP00000382428	HOMER2,GRM5,HOMER1,GRM1,DLG4
11	hsa04720	Long-term potentiation	3	64	1.92	0.001	9606.ENSP00000286548,9606.ENSP00000306138,9606.ENSP00000354896	GNAQ,GRM5,GRM1
11	HSA-420499	Class C/3 (Metabotropic glutamate/pheromone receptors)	3	39	2.14	0.0011	9606.ENSP00000306138,9606.ENSP00000354896,9606.ENSP00000420194	GRM5,GRM1,CASR
11	hsa04540	Gap junction	3	87	1.79	0.0017	9606.ENSP00000286548,9606.ENSP00000306138,9606.ENSP00000354896	GNAQ,GRM5,GRM1
11	HSA-416476	G alpha (q) signalling events	4	214	1.52	0.002	9606.ENSP00000286548,9606.ENSP00000306138,9606.ENSP00000354896,9606.ENSP00000420194	GNAQ,GRM5,GRM1,CASR
11	hsa04068	FoxO signaling pathway	3	127	1.62	0.0038	9606.ENSP00000305632,9606.ENSP00000334382,9606.ENSP00000354896	HOMER2,HOMER1,GRM1
11	hsa04723	Retrograde endocannabinoid signaling	3	145	1.57	0.0038	9606.ENSP00000286548,9606.ENSP00000306138,9606.ENSP00000354896	GNAQ,GRM5,GRM1
11	hsa04915	Estrogen signaling pathway	3	133	1.6	0.0038	9606.ENSP00000286548,9606.ENSP00000354896,9606.ENSP00000405330	GNAQ,GRM1,ESR1
11	hsa04020	Calcium signaling pathway	3	193	1.44	0.0074	9606.ENSP00000286548,9606.ENSP00000306138,9606.ENSP00000354896	GNAQ,GRM5,GRM1
11	hsa04961	Endocrine and other factor-regulated calcium reabsorption	2	53	1.83	0.0176	9606.ENSP00000286548,9606.ENSP00000405330	GNAQ,ESR1
11	hsa04730	Long-term depression	2	59	1.78	0.0193	9606.ENSP00000286548,9606.ENSP00000354896	GNAQ,GRM1
11	hsa05016	Huntington disease	3	298	1.25	0.0193	9606.ENSP00000286548,9606.ENSP00000306138,9606.ENSP00000382428	GNAQ,GRM5,DLG4
11	hsa04928	Parathyroid hormone synthesis, secretion and action	2	103	1.54	0.0464	9606.ENSP00000286548,9606.ENSP00000420194	GNAQ,CASR
12	HSA-1474228	Degradation of the extracellular matrix	5	140	1.8	2.01e-05	9606.ENSP00000308208,9606.ENSP00000309968,9606.ENSP00000325527,9606.ENSP00000375069,9606.ENSP00000483552	MMP14,ADAM17,FBN1,COL23A1,FURIN
12	HSA-1442490	Collagen degradation	4	64	2.05	4.68e-05	9606.ENSP00000308208,9606.ENSP00000309968,9606.ENSP00000375069,9606.ENSP00000483552	MMP14,ADAM17,COL23A1,FURIN
12	HSA-5210891	Uptake and function of anthrax toxins	3	11	2.69	4.68e-05	9606.ENSP00000301945,9606.ENSP00000306185,9606.ENSP00000483552	ANTXR1,ANTXR2,FURIN
12	HSA-167060	NGF processing	2	4	2.95	0.0016	9606.ENSP00000358525,9606.ENSP00000483552	NGF,FURIN
12	HSA-2660826	Constitutive Signaling by NOTCH1 t(7;9)(NOTCH1:M1580_K2555) Translocation Mutant	2	7	2.71	0.0028	9606.ENSP00000277541,9606.ENSP00000309968	NOTCH1,ADAM17
12	HSA-9662834	CD163 mediating an anti-inflammatory response	2	9	2.6	0.0034	9606.ENSP00000309968,9606.ENSP00000483552	ADAM17,FURIN
12	HSA-2691232	Constitutive Signaling by NOTCH1 HD Domain Mutants	2	15	2.38	0.0077	9606.ENSP00000277541,9606.ENSP00000309968	NOTCH1,ADAM17
12	HSA-1912420	Pre-NOTCH Processing in Golgi	2	17	2.32	0.0082	9606.ENSP00000277541,9606.ENSP00000483552	NOTCH1,FURIN
12	HSA-5663205	Infectious disease	5	826	1.03	0.0082	9606.ENSP00000301945,9606.ENSP00000306185,9606.ENSP00000309968,9606.ENSP00000316454,9606.ENSP00000483552	ANTXR1,ANTXR2,ADAM17,PACS1,FURIN
12	HSA-1643685	Disease	6	1548	0.84	0.0117	9606.ENSP00000277541,9606.ENSP00000301945,9606.ENSP00000306185,9606.ENSP00000309968,9606.ENSP00000316454,9606.ENSP00000483552	NOTCH1,ANTXR1,ANTXR2,ADAM17,PACS1,FURIN
12	HSA-2122948	Activated NOTCH1 Transmits Signal to the Nucleus	2	31	2.06	0.0204	9606.ENSP00000277541,9606.ENSP00000309968	NOTCH1,ADAM17
12	HSA-157118	Signaling by NOTCH	3	202	1.42	0.0216	9606.ENSP00000277541,9606.ENSP00000309968,9606.ENSP00000483552	NOTCH1,ADAM17,FURIN
12	HSA-1592389	Activation of Matrix Metalloproteinases	2	33	2.03	0.0216	9606.ENSP00000308208,9606.ENSP00000483552	MMP14,FURIN
12	HSA-1566948	Elastic fibre formation	2	45	1.9	0.035	9606.ENSP00000325527,9606.ENSP00000483552	FBN1,FURIN
13	hsa00601	Glycosphingolipid biosynthesis - lacto and neolacto series	8	26	2.88	1.14e-20	9606.ENSP00000302599,9606.ENSP00000305603,9606.ENSP00000312021,9606.ENSP00000313398,9606.ENSP00000351602,9606.ENSP00000387498,9606.ENSP00000466880,9606.ENSP00000483018	FUT9,FUT3,FUT1,FUT6,FUT4,FUT2,FUT5,ABO
13	HSA-9033658	Blood group systems biosynthesis	8	20	2.99	1.26e-20	9606.ENSP00000302599,9606.ENSP00000305603,9606.ENSP00000312021,9606.ENSP00000313398,9606.ENSP00000351602,9606.ENSP00000387498,9606.ENSP00000466880,9606.ENSP00000483018	FUT9,FUT3,FUT1,FUT6,FUT4,FUT2,FUT5,ABO
13	HSA-9037629	Lewis blood group biosynthesis	6	17	2.94	3.93e-14	9606.ENSP00000302599,9606.ENSP00000305603,9606.ENSP00000313398,9606.ENSP00000351602,9606.ENSP00000387498,9606.ENSP00000466880	FUT9,FUT3,FUT6,FUT4,FUT2,FUT5
13	hsa01100	Metabolic pathways	8	1447	1.13	1.54e-07	9606.ENSP00000302599,9606.ENSP00000305603,9606.ENSP00000312021,9606.ENSP00000313398,9606.ENSP00000351602,9606.ENSP00000387498,9606.ENSP00000466880,9606.ENSP00000483018	FUT9,FUT3,FUT1,FUT6,FUT4,FUT2,FUT5,ABO
13	HSA-9033807	ABO blood group biosynthesis	3	3	3.39	4.86e-07	9606.ENSP00000312021,9606.ENSP00000387498,9606.ENSP00000483018	FUT1,FUT2,ABO
13	hsa00603	Glycosphingolipid biosynthesis - globo and isoglobo series	3	15	2.69	4.08e-06	9606.ENSP00000302599,9606.ENSP00000312021,9606.ENSP00000387498	FUT9,FUT1,FUT2
13	hsa00515	Mannose type O-glycan biosynthesis	2	22	2.35	0.0034	9606.ENSP00000302599,9606.ENSP00000351602	FUT9,FUT4
14	HSA-196791	Vitamin D (calciferol) metabolism	8	11	3.25	3.08e-22	9606.ENSP00000216862,9606.ENSP00000228606,9606.ENSP00000263816,9606.ENSP00000334592,9606.ENSP00000367064,9606.ENSP00000376911,9606.ENSP00000421725,9606.ENSP00000447173	CYP24A1,CYP27B1,LRP2,CYP2R1,CUBN,LGMN,GC,VDR
14	HSA-211916	Vitamins	3	6	3.09	2.04e-06	9606.ENSP00000216862,9606.ENSP00000228606,9606.ENSP00000334592	CYP24A1,CYP27B1,CYP2R1
14	hsa00100	Steroid biosynthesis	3	20	2.56	2.66e-05	9606.ENSP00000216862,9606.ENSP00000228606,9606.ENSP00000334592	CYP24A1,CYP27B1,CYP2R1
14	HSA-5579029	Metabolic disorders of biological oxidation enzymes	3	36	2.31	0.00015	9606.ENSP00000216862,9606.ENSP00000228606,9606.ENSP00000334592	CYP24A1,CYP27B1,CYP2R1
14	HSA-5668914	Diseases of metabolism	4	244	1.6	0.00052	9606.ENSP00000216862,9606.ENSP00000228606,9606.ENSP00000334592,9606.ENSP00000367064	CYP24A1,CYP27B1,CYP2R1,CUBN
14	hsa04928	Parathyroid hormone synthesis, secretion and action	3	103	1.85	0.0014	9606.ENSP00000216862,9606.ENSP00000228606,9606.ENSP00000447173	CYP24A1,CYP27B1,VDR
15	HSA-76046	RNA Polymerase III Transcription Initiation	7	35	2.75	2.69e-16	9606.ENSP00000220659,9606.ENSP00000228347,9606.ENSP00000263956,9606.ENSP00000351575,9606.ENSP00000366828,9606.ENSP00000375942,9606.ENSP00000380904	BRF2,POLR3B,GTF3C3,BDP1,POLR3F,TBP,POLR3D
15	HSA-749476	RNA Polymerase III Abortive And Retractive Initiation	7	40	2.69	3.13e-16	9606.ENSP00000220659,9606.ENSP00000228347,9606.ENSP00000263956,9606.ENSP00000351575,9606.ENSP00000366828,9606.ENSP00000375942,9606.ENSP00000380904	BRF2,POLR3B,GTF3C3,BDP1,POLR3F,TBP,POLR3D
15	HSA-76061	RNA Polymerase III Transcription Initiation From Type 1 Promoter	6	27	2.79	4.41e-14	9606.ENSP00000228347,9606.ENSP00000263956,9606.ENSP00000351575,9606.ENSP00000366828,9606.ENSP00000375942,9606.ENSP00000380904	POLR3B,GTF3C3,BDP1,POLR3F,TBP,POLR3D
15	HSA-76066	RNA Polymerase III Transcription Initiation From Type 2 Promoter	6	26	2.81	4.41e-14	9606.ENSP00000228347,9606.ENSP00000263956,9606.ENSP00000351575,9606.ENSP00000366828,9606.ENSP00000375942,9606.ENSP00000380904	POLR3B,GTF3C3,BDP1,POLR3F,TBP,POLR3D
15	HSA-76071	RNA Polymerase III Transcription Initiation From Type 3 Promoter	6	27	2.79	4.41e-14	9606.ENSP00000220659,9606.ENSP00000228347,9606.ENSP00000351575,9606.ENSP00000366828,9606.ENSP00000375942,9606.ENSP00000380904	BRF2,POLR3B,BDP1,POLR3F,TBP,POLR3D
15	HSA-73780	RNA Polymerase III Chain Elongation	3	17	2.69	8.65e-06	9606.ENSP00000228347,9606.ENSP00000366828,9606.ENSP00000380904	POLR3B,POLR3F,POLR3D
15	HSA-73980	RNA Polymerase III Transcription Termination	3	22	2.58	1.55e-05	9606.ENSP00000228347,9606.ENSP00000366828,9606.ENSP00000380904	POLR3B,POLR3F,POLR3D
15	hsa03020	RNA polymerase	3	31	2.43	5.61e-05	9606.ENSP00000228347,9606.ENSP00000366828,9606.ENSP00000380904	POLR3B,POLR3F,POLR3D
15	hsa04623	Cytosolic DNA-sensing pathway	3	62	2.13	0.0002	9606.ENSP00000228347,9606.ENSP00000366828,9606.ENSP00000380904	POLR3B,POLR3F,POLR3D
15	HSA-1834949	Cytosolic sensors of pathogen-associated DNA	3	62	2.13	0.00026	9606.ENSP00000228347,9606.ENSP00000366828,9606.ENSP00000380904	POLR3B,POLR3F,POLR3D
16	HSA-5668541	TNFR2 non-canonical NF-kB pathway	6	98	2.3	4.22e-11	9606.ENSP00000053243,9606.ENSP00000247668,9606.ENSP00000261652,9606.ENSP00000291232,9606.ENSP00000365048,9606.ENSP00000454207	TNFRSF17,TRAF2,TNFRSF13B,TNFRSF13C,TNFSF13B,TRAF3
16	HSA-5676594	TNF receptor superfamily (TNFSF) members mediating non-canonical NF-kB pathway	4	17	2.88	1.59e-08	9606.ENSP00000247668,9606.ENSP00000291232,9606.ENSP00000365048,9606.ENSP00000454207	TRAF2,TNFRSF13C,TNFSF13B,TRAF3
16	hsa04672	Intestinal immune network for IgA production	4	43	2.48	1.47e-07	9606.ENSP00000053243,9606.ENSP00000261652,9606.ENSP00000291232,9606.ENSP00000365048	TNFRSF17,TNFRSF13B,TNFRSF13C,TNFSF13B
16	hsa04064	NF-kappa B signaling pathway	4	101	2.11	1.95e-06	9606.ENSP00000247668,9606.ENSP00000291232,9606.ENSP00000365048,9606.ENSP00000454207	TRAF2,TNFRSF13C,TNFSF13B,TRAF3
16	HSA-5669034	TNFs bind their physiological receptors	3	28	2.54	3.89e-05	9606.ENSP00000053243,9606.ENSP00000261652,9606.ENSP00000365048	TNFRSF17,TNFRSF13B,TNFSF13B
16	hsa04060	Cytokine-cytokine receptor interaction	4	282	1.67	7.33e-05	9606.ENSP00000053243,9606.ENSP00000261652,9606.ENSP00000291232,9606.ENSP00000365048	TNFRSF17,TNFRSF13B,TNFRSF13C,TNFSF13B
16	hsa05340	Primary immunodeficiency	2	37	2.25	0.0049	9606.ENSP00000261652,9606.ENSP00000291232	TNFRSF13B,TNFRSF13C
16	hsa04622	RIG-I-like receptor signaling pathway	2	70	1.97	0.0133	9606.ENSP00000247668,9606.ENSP00000454207	TRAF2,TRAF3
16	hsa04657	IL-17 signaling pathway	2	92	1.85	0.0189	9606.ENSP00000247668,9606.ENSP00000454207	TRAF2,TRAF3
16	hsa05222	Small cell lung cancer	2	92	1.85	0.0189	9606.ENSP00000247668,9606.ENSP00000454207	TRAF2,TRAF3
16	hsa04668	TNF signaling pathway	2	112	1.77	0.0209	9606.ENSP00000247668,9606.ENSP00000454207	TRAF2,TRAF3
16	hsa05160	Hepatitis C	2	156	1.62	0.0355	9606.ENSP00000247668,9606.ENSP00000454207	TRAF2,TRAF3
16	hsa04621	NOD-like receptor signaling pathway	2	174	1.57	0.0396	9606.ENSP00000247668,9606.ENSP00000454207	TRAF2,TRAF3
16	hsa05167	Kaposi sarcoma-associated herpesvirus infection	2	187	1.54	0.0396	9606.ENSP00000247668,9606.ENSP00000454207	TRAF2,TRAF3
16	hsa05169	Epstein-Barr virus infection	2	193	1.53	0.0396	9606.ENSP00000247668,9606.ENSP00000454207	TRAF2,TRAF3
16	hsa05203	Viral carcinogenesis	2	182	1.55	0.0396	9606.ENSP00000247668,9606.ENSP00000454207	TRAF2,TRAF3
17	HSA-5576890	Phase 3 - rapid repolarisation	5	8	3.39	1.17e-13	9606.ENSP00000155840,9606.ENSP00000262186,9606.ENSP00000310557,9606.ENSP00000337255,9606.ENSP00000348573	KCNQ1,KCNH2,KCNE3,KCNE1,AKAP9
17	HSA-5576893	Phase 2 - plateau phase	4	15	3.02	3.44e-09	9606.ENSP00000155840,9606.ENSP00000310557,9606.ENSP00000337255,9606.ENSP00000348573	KCNQ1,KCNE3,KCNE1,AKAP9
17	HSA-1296072	Voltage gated Potassium channels	2	43	2.26	0.0224	9606.ENSP00000155840,9606.ENSP00000262186	KCNQ1,KCNH2
18	HSA-8854214	TBC/RABGAPs	3	44	2.43	0.00028	9606.ENSP00000265062,9606.ENSP00000268607,9606.ENSP00000479762	RAB7A,MAP1LC3B,RAB7B
18	HSA-8934903	Receptor Mediated Mitophagy	2	11	2.85	0.0029	9606.ENSP00000268607,9606.ENSP00000363970	MAP1LC3B,MAP1LC3A
18	hsa05132	Salmonella infection	3	209	1.75	0.0041	9606.ENSP00000265062,9606.ENSP00000296137,9606.ENSP00000479762	RAB7A,FYCO1,RAB7B
18	HSA-5205685	PINK1-PRKN Mediated Mitophagy	2	22	2.55	0.0078	9606.ENSP00000268607,9606.ENSP00000363970	MAP1LC3B,MAP1LC3A
18	hsa04216	Ferroptosis	2	41	2.28	0.0079	9606.ENSP00000268607,9606.ENSP00000363970	MAP1LC3B,MAP1LC3A
18	hsa04137	Mitophagy - animal	2	63	2.09	0.0121	9606.ENSP00000265062,9606.ENSP00000479762	RAB7A,RAB7B
18	hsa05146	Amoebiasis	2	100	1.89	0.0224	9606.ENSP00000265062,9606.ENSP00000479762	RAB7A,RAB7B
18	hsa04140	Autophagy - animal	2	130	1.78	0.0299	9606.ENSP00000265062,9606.ENSP00000479762	RAB7A,RAB7B
18	hsa04145	Phagosome	2	142	1.74	0.0299	9606.ENSP00000265062,9606.ENSP00000479762	RAB7A,RAB7B
18	HSA-8873719	RAB geranylgeranylation	2	64	2.09	0.0403	9606.ENSP00000265062,9606.ENSP00000479762	RAB7A,RAB7B
19	hsa04061	Viral protein interaction with cytokine and cytokine receptor	3	96	2.31	4.22e-05	9606.ENSP00000310405,9606.ENSP00000356792,9606.ENSP00000356793	XCR1,XCL1,XCL2
19	HSA-380108	Chemokine receptors bind chemokines	3	57	2.54	5.95e-05	9606.ENSP00000310405,9606.ENSP00000356792,9606.ENSP00000356793	XCR1,XCL1,XCL2
19	hsa04062	Chemokine signaling pathway	3	186	2.02	0.00015	9606.ENSP00000310405,9606.ENSP00000356792,9606.ENSP00000356793	XCR1,XCL1,XCL2
19	hsa04060	Cytokine-cytokine receptor interaction	3	282	1.84	0.00034	9606.ENSP00000310405,9606.ENSP00000356792,9606.ENSP00000356793	XCR1,XCL1,XCL2
19	HSA-416476	G alpha (q) signalling events	3	214	1.96	0.0011	9606.ENSP00000310405,9606.ENSP00000356792,9606.ENSP00000356793	XCR1,XCL1,XCL2
20	hsa05215	Prostate cancer	2	96	2.31	0.0083	9606.ENSP00000363822,9606.ENSP00000381588	AR,TMPRSS2
21	HSA-352230	Amino acid transport across the plasma membrane	2	33	2.77	0.0068	9606.ENSP00000334223,9606.ENSP00000346298	SLC36A2,SLC6A20
21	HSA-5619102	SLC transporter disorders	2	99	2.3	0.0286	9606.ENSP00000334223,9606.ENSP00000346298	SLC36A2,SLC6A20
22	N.A	N.A	N.A	N.A	N.A	N.A	N.A	N.A
23	HSA-380108	Chemokine receptors bind chemokines	2	57	2.54	0.0194	9606.ENSP00000293778,9606.ENSP00000395704	CXCL16,CXCR6
23	hsa04062	Chemokine signaling pathway	2	186	2.02	0.0309	9606.ENSP00000293778,9606.ENSP00000395704	CXCL16,CXCR6
23	hsa04060	Cytokine-cytokine receptor interaction	2	282	1.84	0.0353	9606.ENSP00000293778,9606.ENSP00000395704	CXCL16,CXCR6
24	hsa04672	Intestinal immune network for IgA production	2	43	2.66	0.0017	9606.ENSP00000350256,9606.ENSP00000375086	CCR9,CCL25
24	hsa04061	Viral protein interaction with cytokine and cytokine receptor	2	96	2.31	0.0042	9606.ENSP00000350256,9606.ENSP00000375086	CCR9,CCL25
24	hsa04062	Chemokine signaling pathway	2	186	2.02	0.0103	9606.ENSP00000350256,9606.ENSP00000375086	CCR9,CCL25
24	hsa04060	Cytokine-cytokine receptor interaction	2	282	1.84	0.0176	9606.ENSP00000350256,9606.ENSP00000375086	CCR9,CCL25
24	HSA-380108	Chemokine receptors bind chemokines	2	57	2.54	0.0194	9606.ENSP00000350256,9606.ENSP00000375086	CCR9,CCL25

## Sheet: T4 List of PPI with conf. 900
#node1	node2	node1_string_id	node2_string_id	neighborhood_on_chromosome	gene_fusion	phylogenetic_cooccurrence	homology	coexpression	experimentally_determined_interaction	database_annotated	automated_textmining	combined_score
IFNA1	IFNAR1	9606.ENSP00000276927	9606.ENSP00000270139	0	0	0	0	0	0.213	0.6	0.989	0.996
IFNA1	TYK2	9606.ENSP00000276927	9606.ENSP00000431885	0	0	0	0	0	0	0	0.933	0.933
IFNA1	JAK1	9606.ENSP00000276927	9606.ENSP00000343204	0	0	0	0	0	0	0.6	0.915	0.964
IFNA1	IFNAR2	9606.ENSP00000276927	9606.ENSP00000343957	0	0	0	0	0	0.27	0.6	0.988	0.996
IFNA2	IFNAR1	9606.ENSP00000369554	9606.ENSP00000270139	0	0	0	0	0	0.967	0.9	0.804	0.999
IFNA2	IFNAR2	9606.ENSP00000369554	9606.ENSP00000343957	0	0	0	0	0	0.973	0.9	0.899	0.999
IFNAR1	IFNW1	9606.ENSP00000270139	9606.ENSP00000369578	0	0	0	0	0	0.932	0.8	0.472	0.992
IFNAR1	STAT1	9606.ENSP00000270139	9606.ENSP00000354394	0	0	0	0	0	0.345	0.9	0.984	0.998
IFNAR1	TYK2	9606.ENSP00000270139	9606.ENSP00000431885	0	0	0	0	0	0.972	0.9	0.99	0.999
IFNAR1	IFNAR2	9606.ENSP00000270139	9606.ENSP00000343957	0	0	0	0	0	0.944	0.9	0.989	0.999
IFNAR1	IFNB1	9606.ENSP00000270139	9606.ENSP00000369581	0	0	0	0	0	0.752	0.9	0.989	0.999
IFNAR1	STAT2	9606.ENSP00000270139	9606.ENSP00000315768	0	0	0	0	0	0.873	0.9	0.986	0.999
IFNAR1	JAK1	9606.ENSP00000270139	9606.ENSP00000343204	0	0	0	0	0	0.281	0.9	0.989	0.999
IFNAR2	USP18	9606.ENSP00000343957	9606.ENSP00000215794	0	0	0	0	0	0.675	0.8	0.988	0.999
IFNAR2	STAT2	9606.ENSP00000343957	9606.ENSP00000315768	0	0	0	0	0	0.837	0.9	0.963	0.999
IFNAR2	JAK1	9606.ENSP00000343957	9606.ENSP00000343204	0	0	0	0	0	0.486	0.9	0.989	0.999
IFNAR2	IFNW1	9606.ENSP00000343957	9606.ENSP00000369578	0	0	0	0	0	0.927	0.8	0.511	0.992
IFNAR2	STAT1	9606.ENSP00000343957	9606.ENSP00000354394	0	0	0	0	0	0.501	0.9	0.918	0.995
IFNAR2	IFNB1	9606.ENSP00000343957	9606.ENSP00000369581	0	0	0	0	0	0.27	0.9	0.986	0.998
IFNAR2	TYK2	9606.ENSP00000343957	9606.ENSP00000431885	0	0	0	0	0	0.213	0.9	0.988	0.998
IFNB1	STAT2	9606.ENSP00000369581	9606.ENSP00000315768	0	0	0	0	0	0	0.9	0.821	0.981
IFNB1	JAK1	9606.ENSP00000369581	9606.ENSP00000343204	0	0	0	0	0	0	0.9	0.683	0.966
IFNB1	STAT1	9606.ENSP00000369581	9606.ENSP00000354394	0	0	0	0	0	0	0.9	0.855	0.984
IFNB1	TYK2	9606.ENSP00000369581	9606.ENSP00000431885	0	0	0	0	0	0	0.9	0.69	0.967
JAK1	USP18	9606.ENSP00000343204	9606.ENSP00000215794	0	0	0	0	0	0.058	0.9	0.591	0.958
JAK1	STAT2	9606.ENSP00000343204	9606.ENSP00000315768	0	0	0	0	0	0.294	0.9	0.891	0.991
JAK1	TYK2	9606.ENSP00000343204	9606.ENSP00000431885	0	0	0	0.926	0	0.462	0.9	0.992	0.948
JAK1	STAT1	9606.ENSP00000343204	9606.ENSP00000354394	0	0	0	0	0	0.711	0.9	0.99	0.999
STAT1	USP18	9606.ENSP00000354394	9606.ENSP00000215794	0	0	0	0	0	0	0.9	0.672	0.965
STAT1	STAT2	9606.ENSP00000354394	9606.ENSP00000315768	0	0	0	0.889	0	0.881	0.9	0.992	0.988
STAT1	TYK2	9606.ENSP00000354394	9606.ENSP00000431885	0	0	0	0	0	0.518	0.9	0.912	0.995
STAT2	USP18	9606.ENSP00000315768	9606.ENSP00000215794	0	0	0	0	0	0.486	0	0.837	0.912
STAT2	TYK2	9606.ENSP00000315768	9606.ENSP00000431885	0	0	0	0	0	0.294	0.9	0.918	0.993
A2M	APOA1	9606.ENSP00000323929	9606.ENSP00000236850	0	0	0	0	0	0	0.9	0.73	0.971
A2M	LRP1	9606.ENSP00000323929	9606.ENSP00000243077	0	0	0	0	0	0.709	0	0.989	0.996
A2M	IL1B	9606.ENSP00000323929	9606.ENSP00000263341	0	0	0	0	0	0.6	0	0.927	0.969
A2M	KLKB1	9606.ENSP00000323929	9606.ENSP00000264690	0	0	0	0	0	0.134	0.6	0.933	0.974
A2M	KLK3	9606.ENSP00000323929	9606.ENSP00000314151	0	0	0	0	0	0.705	0	0.969	0.99
A2M	IL10	9606.ENSP00000323929	9606.ENSP00000412237	0	0	0	0	0	0.632	0	0.841	0.938
A2M	ELANE	9606.ENSP00000323929	9606.ENSP00000466090	0	0	0	0	0	0.134	0	0.963	0.966
A2M	HAMP	9606.ENSP00000323929	9606.ENSP00000471894	0	0	0	0	0	0	0	0.981	0.981
A2M	KLK4	9606.ENSP00000323929	9606.ENSP00000326159	0	0	0	0	0	0.134	0	0.989	0.99
A2M	HSPA5	9606.ENSP00000323929	9606.ENSP00000324173	0	0	0	0	0	0.669	0	0.994	0.998
APOA1	LRP1	9606.ENSP00000236850	9606.ENSP00000243077	0	0	0	0	0	0	0.9	0.369	0.934
IL10	IL1B	9606.ENSP00000412237	9606.ENSP00000263341	0	0	0	0	0	0	0.9	0.959	0.995
ABO	FUT9	9606.ENSP00000483018	9606.ENSP00000302599	0	0	0	0	0	0	0.9	0	0.9
ABO	FUT3	9606.ENSP00000483018	9606.ENSP00000305603	0	0	0	0	0	0	0.9	0.119	0.908
ABO	FUT1	9606.ENSP00000483018	9606.ENSP00000312021	0	0	0	0	0	0	0.9	0.198	0.916
ABO	FUT6	9606.ENSP00000483018	9606.ENSP00000313398	0	0	0	0	0	0	0.9	0.134	0.909
ABO	FUT4	9606.ENSP00000483018	9606.ENSP00000351602	0	0	0	0	0	0	0.9	0	0.9
ABO	FUT2	9606.ENSP00000483018	9606.ENSP00000387498	0	0	0	0	0	0	0.9	0.236	0.92
ABO	FUT5	9606.ENSP00000483018	9606.ENSP00000466880	0	0	0	0	0	0	0.9	0	0.9
FUT1	FUT9	9606.ENSP00000312021	9606.ENSP00000302599	0	0	0	0	0	0	0.9	0.786	0.977
FUT1	FUT3	9606.ENSP00000312021	9606.ENSP00000305603	0	0	0	0	0	0	0.9	0.864	0.985
FUT1	FUT6	9606.ENSP00000312021	9606.ENSP00000313398	0	0	0	0	0	0	0.9	0.77	0.976
FUT1	FUT4	9606.ENSP00000312021	9606.ENSP00000351602	0	0	0	0	0	0	0.9	0.777	0.976
FUT1	FUT5	9606.ENSP00000312021	9606.ENSP00000466880	0	0	0	0	0	0	0.9	0.798	0.979
FUT2	FUT9	9606.ENSP00000387498	9606.ENSP00000302599	0	0	0	0	0	0	0.9	0.699	0.968
FUT2	FUT3	9606.ENSP00000387498	9606.ENSP00000305603	0	0	0	0	0	0	0.9	0.903	0.989
FUT2	FUT6	9606.ENSP00000387498	9606.ENSP00000313398	0	0	0	0	0	0	0.9	0.753	0.974
FUT2	FUT4	9606.ENSP00000387498	9606.ENSP00000351602	0	0	0	0	0	0	0.9	0.787	0.977
FUT2	FUT5	9606.ENSP00000387498	9606.ENSP00000466880	0	0	0	0	0	0	0.9	0.797	0.978
FUT3	FUT9	9606.ENSP00000305603	9606.ENSP00000302599	0	0	0	0.877	0	0	0.9	0.81	0.909
FUT3	FUT4	9606.ENSP00000305603	9606.ENSP00000351602	0	0	0	0.877	0	0	0.9	0.831	0.91
FUT4	FUT9	9606.ENSP00000351602	9606.ENSP00000302599	0	0	0	0.884	0	0	0.9	0.873	0.91
FUT4	FUT6	9606.ENSP00000351602	9606.ENSP00000313398	0	0	0	0.875	0	0	0.9	0.802	0.909
FUT4	FUT5	9606.ENSP00000351602	9606.ENSP00000466880	0	0	0	0.873	0	0	0.9	0.822	0.91
FUT5	FUT9	9606.ENSP00000466880	9606.ENSP00000302599	0	0	0	0.881	0	0	0.9	0.798	0.909
FUT6	FUT9	9606.ENSP00000313398	9606.ENSP00000302599	0	0	0	0.88	0	0	0.9	0.811	0.909
ACE	KNG1	9606.ENSP00000290866	9606.ENSP00000265023	0	0	0	0	0	0	0.8	0.914	0.982
ACE	REN	9606.ENSP00000290866	9606.ENSP00000272190	0	0	0	0	0	0	0	0.967	0.967
ACE	RHOC	9606.ENSP00000290866	9606.ENSP00000285735	0	0	0	0	0	0.932	0	0.053	0.932
ACE	AGTR2	9606.ENSP00000290866	9606.ENSP00000360973	0	0	0	0	0	0.213	0	0.895	0.914
ACE	AGTR1	9606.ENSP00000290866	9606.ENSP00000419422	0	0	0	0	0	0	0	0.922	0.922
ACE	RHOA	9606.ENSP00000290866	9606.ENSP00000400175	0	0	0	0	0	0.941	0	0.399	0.963
ACE	AGT	9606.ENSP00000290866	9606.ENSP00000355627	0	0	0	0	0	0.822	0.9	0.94	0.998
AGT	REN	9606.ENSP00000355627	9606.ENSP00000272190	0	0	0	0	0	0.936	0.9	0.992	0.999
AGT	AGTR1	9606.ENSP00000355627	9606.ENSP00000419422	0	0	0	0	0	0.501	0.9	0.872	0.993
AGT	AGTR2	9606.ENSP00000355627	9606.ENSP00000360973	0	0	0	0	0	0.846	0.9	0.902	0.998
AGTR1	KNG1	9606.ENSP00000419422	9606.ENSP00000265023	0	0	0	0	0	0	0	0.987	0.987
AGTR1	REN	9606.ENSP00000419422	9606.ENSP00000272190	0	0	0	0	0	0	0	0.942	0.942
KNG1	REN	9606.ENSP00000265023	9606.ENSP00000272190	0	0	0	0	0	0	0	0.929	0.929
RHOA	RHOC	9606.ENSP00000400175	9606.ENSP00000285735	0	0	0	0.984	0	0.736	0.9	0.838	0.972
ACE2	MEP1A	9606.ENSP00000389326	9606.ENSP00000230588	0	0	0	0	0	0	0.8	0.543	0.904
ACE2	REN	9606.ENSP00000389326	9606.ENSP00000272190	0	0	0	0	0	0	0	0.965	0.965
ACE2	SLC6A19	9606.ENSP00000389326	9606.ENSP00000305302	0	0	0	0	0	0.974	0	0.975	0.999
ACE2	DPP4	9606.ENSP00000389326	9606.ENSP00000353731	0	0	0	0	0	0	0.8	0.903	0.979
ACE2	AGT	9606.ENSP00000389326	9606.ENSP00000355627	0	0	0	0	0	0.845	0.9	0.878	0.997
ACE2	PRCP	9606.ENSP00000389326	9606.ENSP00000377055	0	0	0	0	0	0	0.8	0.659	0.929
ACE2	SLC1A7	9606.ENSP00000389326	9606.ENSP00000478639	0	0	0	0	0	0	0	0.923	0.923
ACE2	MME	9606.ENSP00000389326	9606.ENSP00000418525	0	0	0	0	0	0	0.8	0.754	0.948
AGT	REN	9606.ENSP00000355627	9606.ENSP00000272190	0	0	0	0	0	0.936	0.9	0.992	0.999
AGT	MME	9606.ENSP00000355627	9606.ENSP00000418525	0	0	0	0	0	0.27	0.9	0.463	0.957
DPP4	PRCP	9606.ENSP00000353731	9606.ENSP00000377055	0	0	0	0	0	0	0.8	0.566	0.909
DPP4	MME	9606.ENSP00000353731	9606.ENSP00000418525	0	0	0	0	0	0	0.8	0.663	0.929
MEP1A	PRCP	9606.ENSP00000230588	9606.ENSP00000377055	0	0	0	0	0	0	0.8	0.608	0.918
AHNAK	S100B	9606.ENSP00000367263	9606.ENSP00000291700	0	0	0	0	0	0.27	0	0.957	0.967
AHNAK	ANXA2	9606.ENSP00000367263	9606.ENSP00000346032	0	0	0	0	0	0.574	0.8	0.989	0.999
AHNAK	S100A10	9606.ENSP00000367263	9606.ENSP00000357801	0	0	0	0	0	0.926	0.8	0.976	0.999
AHNAK	DYSF	9606.ENSP00000367263	9606.ENSP00000386881	0	0	0	0	0	0	0	0.981	0.981
ANXA2	DYSF	9606.ENSP00000346032	9606.ENSP00000386881	0	0	0	0	0	0.302	0.8	0.921	0.988
ANXA2	S100A10	9606.ENSP00000346032	9606.ENSP00000357801	0	0	0	0	0	0.901	0.9	0.989	0.999
APOA1	APOB	9606.ENSP00000236850	9606.ENSP00000233242	0	0	0	0	0	0.698	0.72	0.928	0.993
APOA1	LRP8	9606.ENSP00000236850	9606.ENSP00000303634	0	0	0	0	0	0	0.9	0.335	0.93
APOA1	LRP1	9606.ENSP00000236850	9606.ENSP00000243077	0	0	0	0	0	0	0.9	0.369	0.934
APOA1	APP	9606.ENSP00000236850	9606.ENSP00000284981	0	0	0	0	0	0.68	0.72	0.457	0.947
APOA1	LDLR	9606.ENSP00000236850	9606.ENSP00000454071	0	0	0	0	0	0	0.9	0.711	0.969
APOA1	APOE	9606.ENSP00000236850	9606.ENSP00000252486	0	0	0	0	0	0.371	0.8	0.981	0.997
APOB	LRP1	9606.ENSP00000233242	9606.ENSP00000243077	0	0	0	0	0	0.111	0.9	0.569	0.958
APOB	APOE	9606.ENSP00000233242	9606.ENSP00000252486	0	0	0	0	0	0.385	0.72	0.991	0.998
APOB	LDLR	9606.ENSP00000233242	9606.ENSP00000454071	0	0	0	0	0	0.696	0.8	0.989	0.999
APOE	LRP1	9606.ENSP00000252486	9606.ENSP00000243077	0	0	0	0	0	0.789	0.9	0.989	0.999
APOE	TREM2	9606.ENSP00000252486	9606.ENSP00000362205	0	0	0	0	0	0.62	0	0.988	0.995
APOE	SORL1	9606.ENSP00000252486	9606.ENSP00000260197	0	0	0	0	0	0.622	0	0.987	0.994
APOE	MAPT	9606.ENSP00000252486	9606.ENSP00000340820	0	0	0	0	0	0.823	0	0.983	0.996
APOE	VLDLR	9606.ENSP00000252486	9606.ENSP00000371532	0	0	0	0	0	0.473	0.54	0.988	0.996
APOE	LDLR	9606.ENSP00000252486	9606.ENSP00000454071	0	0	0	0	0	0.745	0.6	0.989	0.998
APOE	APP	9606.ENSP00000252486	9606.ENSP00000284981	0	0	0	0	0	0.871	0.72	0.972	0.998
APOE	LRP8	9606.ENSP00000252486	9606.ENSP00000303634	0	0	0	0	0	0.683	0.9	0.989	0.999
APP	LRP1	9606.ENSP00000284981	9606.ENSP00000243077	0	0	0	0	0	0.684	0	0.974	0.991
APP	SORL1	9606.ENSP00000284981	9606.ENSP00000260197	0	0	0	0	0	0.887	0.8	0.989	0.999
APP	LDLR	9606.ENSP00000284981	9606.ENSP00000454071	0	0	0	0	0	0.058	0.54	0.787	0.9
APP	LRP8	9606.ENSP00000284981	9606.ENSP00000303634	0	0	0	0	0	0.282	0	0.914	0.935
APP	MAPT	9606.ENSP00000284981	9606.ENSP00000340820	0	0	0	0	0	0.746	0	0.883	0.969
LRP8	VLDLR	9606.ENSP00000303634	9606.ENSP00000371532	0	0	0	0.94	0	0.312	0.9	0.989	0.932
BDP1	BRF2	9606.ENSP00000351575	9606.ENSP00000220659	0	0	0	0	0	0.952	0.8	0.877	0.998
BDP1	POLR3B	9606.ENSP00000351575	9606.ENSP00000228347	0	0	0	0	0	0.709	0.6	0.653	0.956
BDP1	GTF3C3	9606.ENSP00000351575	9606.ENSP00000263956	0	0	0	0	0	0.751	0.9	0.824	0.995
BDP1	POLR3D	9606.ENSP00000351575	9606.ENSP00000380904	0	0	0	0	0	0.551	0.6	0.707	0.942
BDP1	POLR3F	9606.ENSP00000351575	9606.ENSP00000366828	0	0	0	0	0	0.739	0.6	0.931	0.992
BDP1	TBP	9606.ENSP00000351575	9606.ENSP00000375942	0	0	0	0	0	0.952	0.8	0.993	0.999
BRF2	POLR3B	9606.ENSP00000220659	9606.ENSP00000228347	0	0	0	0	0	0.631	0.6	0.403	0.904
BRF2	POLR3D	9606.ENSP00000220659	9606.ENSP00000380904	0	0	0	0	0	0.672	0.6	0.385	0.912
BRF2	GTF3C3	9606.ENSP00000220659	9606.ENSP00000263956	0	0	0	0	0	0.616	0.72	0.535	0.945
BRF2	POLR3F	9606.ENSP00000220659	9606.ENSP00000366828	0	0	0	0	0	0.761	0.6	0.746	0.973
BRF2	TBP	9606.ENSP00000220659	9606.ENSP00000375942	0	0	0	0	0	0.951	0.8	0.645	0.996
POLR3B	POLR3D	9606.ENSP00000228347	9606.ENSP00000380904	0	0	0	0	0	0.991	0.9	0.786	0.999
POLR3B	POLR3F	9606.ENSP00000228347	9606.ENSP00000366828	0	0	0	0	0	0.978	0.9	0.803	0.999
POLR3D	POLR3F	9606.ENSP00000380904	9606.ENSP00000366828	0	0	0	0	0	0.984	0.9	0.867	0.999
C4A	C4BPA	9606.ENSP00000396688	9606.ENSP00000356037	0	0	0	0	0	0.213	0.8	0.831	0.971
C4B	C4BPA	9606.ENSP00000415941	9606.ENSP00000356037	0	0	0	0	0	0.213	0.8	0.724	0.952
C4B	CD40	9606.ENSP00000415941	9606.ENSP00000361359	0	0	0	0	0	0	0	0.97	0.97
C4B	PROS1	9606.ENSP00000415941	9606.ENSP00000377783	0	0	0	0	0	0	0	0.977	0.977
C4BPA	NFKBIA	9606.ENSP00000356037	9606.ENSP00000216797	0	0	0	0	0	0	0.9	0	0.9
C4BPA	NFKB1	9606.ENSP00000356037	9606.ENSP00000226574	0	0	0	0	0	0	0.9	0.045	0.9
C4BPA	RELA	9606.ENSP00000356037	9606.ENSP00000384273	0	0	0	0	0	0	0.9	0.045	0.9
C4BPA	PROS1	9606.ENSP00000356037	9606.ENSP00000377783	0	0	0	0	0	0.213	0.6	0.779	0.924
C4BPA	CD40	9606.ENSP00000356037	9606.ENSP00000361359	0	0	0	0	0	0	0.9	0.669	0.965
CD40	NFKBIA	9606.ENSP00000361359	9606.ENSP00000216797	0	0	0	0	0	0	0.9	0.761	0.975
CD40	NFKB1	9606.ENSP00000361359	9606.ENSP00000226574	0	0	0	0	0	0	0.9	0.465	0.944
CD40	RELA	9606.ENSP00000361359	9606.ENSP00000384273	0	0	0	0	0	0	0.9	0.989	0.998
NFKB1	NFKBIA	9606.ENSP00000226574	9606.ENSP00000216797	0	0	0	0.762	0	0.986	0.9	0.98	0.998
NFKB1	RELA	9606.ENSP00000226574	9606.ENSP00000384273	0	0	0	0.776	0	0.998	0.9	0.991	0.999
NFKBIA	RELA	9606.ENSP00000216797	9606.ENSP00000384273	0	0	0	0	0	0.998	0.9	0.989	0.999
CCL25	CCR9	9606.ENSP00000375086	9606.ENSP00000350256	0	0	0	0	0	0.476	0.8	0.989	0.998
C3	CD55	9606.ENSP00000245907	9606.ENSP00000356030	0	0	0	0	0	0.8	0.6	0.977	0.997
C4A	CD55	9606.ENSP00000396688	9606.ENSP00000356030	0	0	0	0	0	0	0.6	0.846	0.935
CD55	CD97	9606.ENSP00000356030	9606.ENSP00000242786	0	0	0	0	0	0.213	0.8	0.989	0.998
CD55	EGF	9606.ENSP00000356030	9606.ENSP00000265171	0	0	0	0	0	0	0	0.923	0.923
CD55	CD59	9606.ENSP00000356030	9606.ENSP00000379191	0	0	0	0	0	0	0.5	0.915	0.955
ADM	CFH	9606.ENSP00000436607	9606.ENSP00000356399	0	0	0	0	0	0.213	0	0.975	0.979
ARMS2	CFH	9606.ENSP00000436682	9606.ENSP00000356399	0	0	0	0	0	0	0	0.916	0.916
C3	CRP	9606.ENSP00000245907	9606.ENSP00000255030	0	0	0	0	0	0.486	0	0.897	0.944
C3	CFHR3	9606.ENSP00000245907	9606.ENSP00000356395	0	0	0	0	0	0.27	0.6	0.936	0.979
C3	ITGAM	9606.ENSP00000245907	9606.ENSP00000441691	0	0	0	0	0	0.835	0.9	0.772	0.995
C3	CFHR1	9606.ENSP00000245907	9606.ENSP00000314299	0	0	0	0	0	0.973	0.6	0.955	0.999
C3	CFI	9606.ENSP00000245907	9606.ENSP00000378130	0	0	0	0	0	0.974	0.8	0.971	0.999
C3	CFH	9606.ENSP00000245907	9606.ENSP00000356399	0	0	0	0	0	0.982	0.8	0.989	0.999
C3	CFB	9606.ENSP00000245907	9606.ENSP00000416561	0	0	0	0	0	0.977	0.8	0.989	0.999
CFB	CFH	9606.ENSP00000416561	9606.ENSP00000356399	0	0	0	0.543	0	0.297	0.8	0.884	0.912
CFB	CFI	9606.ENSP00000416561	9606.ENSP00000378130	0	0	0	0	0	0	0.65	0.833	0.939
CFH	CRP	9606.ENSP00000356399	9606.ENSP00000255030	0	0	0	0	0	0.905	0	0.989	0.998
CFH	PTX3	9606.ENSP00000356399	9606.ENSP00000295927	0	0	0	0	0	0.877	0	0.963	0.995
CFH	CFHR1	9606.ENSP00000356399	9606.ENSP00000314299	0	0	0	0.96	0	0.932	0	0.874	0.934
CFH	CFHR3	9606.ENSP00000356399	9606.ENSP00000356395	0	0	0	0.946	0	0.229	0.9	0.87	0.923
CFH	ITGAM	9606.ENSP00000356399	9606.ENSP00000441691	0	0	0	0	0	0.213	0	0.925	0.938
CFH	CFI	9606.ENSP00000356399	9606.ENSP00000378130	0	0	0	0	0	0.87	0.6	0.93	0.996
CFHR1	PTX3	9606.ENSP00000314299	9606.ENSP00000295927	0	0	0	0	0	0.486	0	0.828	0.907
C2	MASP1	9606.ENSP00000299367	9606.ENSP00000296280	0	0	0	0.544	0	0.213	0.9	0.453	0.934
C2	COLEC11	9606.ENSP00000299367	9606.ENSP00000411770	0	0	0	0	0	0	0.9	0.196	0.916
C2	MASP2	9606.ENSP00000299367	9606.ENSP00000383690	0	0	0	0.553	0	0	0.9	0.463	0.919
C2	C4A	9606.ENSP00000299367	9606.ENSP00000396688	0	0	0	0	0	0.134	0.8	0.709	0.945
C2	C4B	9606.ENSP00000299367	9606.ENSP00000415941	0	0	0	0	0	0.535	0.8	0.654	0.965
C4A	MASP1	9606.ENSP00000396688	9606.ENSP00000296280	0	0	0	0	0	0.255	0.9	0.684	0.974
C4A	MASP2	9606.ENSP00000396688	9606.ENSP00000383690	0	0	0	0	0	0.654	0.9	0.749	0.99
C4A	COLEC11	9606.ENSP00000396688	9606.ENSP00000411770	0	0	0	0	0	0	0.9	0.527	0.95
C4B	MASP1	9606.ENSP00000415941	9606.ENSP00000296280	0	0	0	0	0	0.388	0.9	0.862	0.99
C4B	MASP2	9606.ENSP00000415941	9606.ENSP00000383690	0	0	0	0	0	0.526	0.9	0.707	0.984
C4B	COLEC11	9606.ENSP00000415941	9606.ENSP00000411770	0	0	0	0	0	0	0.9	0.528	0.95
COLEC11	MASP1	9606.ENSP00000411770	9606.ENSP00000296280	0	0	0	0	0	0	0.5	0.927	0.961
COLEC11	MASP2	9606.ENSP00000411770	9606.ENSP00000383690	0	0	0	0	0	0	0.5	0.858	0.925
MASP1	MASP2	9606.ENSP00000296280	9606.ENSP00000383690	0	0	0	0.923	0	0.27	0.9	0.99	0.929
CXCL16	CXCR6	9606.ENSP00000293778	9606.ENSP00000395704	0	0	0	0	0	0.213	0.8	0.989	0.998
CYP24A1	VDR	9606.ENSP00000216862	9606.ENSP00000447173	0	0	0	0	0	0.345	0	0.884	0.921
CYP24A1	CYP27B1	9606.ENSP00000216862	9606.ENSP00000228606	0	0	0	0.814	0	0	0.9	0.95	0.917
CYP24A1	CYP2R1	9606.ENSP00000216862	9606.ENSP00000334592	0	0	0	0.602	0	0.142	0.9	0.911	0.942
CYP27B1	CYP2R1	9606.ENSP00000228606	9606.ENSP00000334592	0	0	0	0.607	0	0.43	0.9	0.94	0.962
CYP27B1	VDR	9606.ENSP00000228606	9606.ENSP00000447173	0	0	0	0	0	0.097	0	0.994	0.994
EGF	F3	9606.ENSP00000265171	9606.ENSP00000334145	0	0	0	0	0	0	0	0.966	0.966
EGR1	F3	9606.ENSP00000239938	9606.ENSP00000334145	0	0	0	0	0	0	0.9	0.517	0.949
F10	F9	9606.ENSP00000364709	9606.ENSP00000218099	0	0	0	0.917	0	0	0.9	0.875	0.907
F10	TFPI	9606.ENSP00000364709	9606.ENSP00000233156	0	0	0	0	0	0.519	0.8	0.93	0.992
F10	F2	9606.ENSP00000364709	9606.ENSP00000308541	0	0	0	0.763	0	0	0.9	0.979	0.923
F10	F3	9606.ENSP00000364709	9606.ENSP00000334145	0	0	0	0	0	0.213	0.6	0.988	0.995
F10	SERPINC1	9606.ENSP00000364709	9606.ENSP00000356671	0	0	0	0	0	0.816	0.9	0.987	0.999
F10	F5	9606.ENSP00000364709	9606.ENSP00000356771	0	0	0	0	0	0.292	0.6	0.803	0.939
F2	F5	9606.ENSP00000308541	9606.ENSP00000356771	0	0	0	0	0	0.478	0.9	0.805	0.988
F2	F3	9606.ENSP00000308541	9606.ENSP00000334145	0	0	0	0	0	0	0.9	0.921	0.991
F2	SERPINC1	9606.ENSP00000308541	9606.ENSP00000356671	0	0	0	0	0	0.937	0.9	0.968	0.999
F3	F9	9606.ENSP00000334145	9606.ENSP00000218099	0	0	0	0	0	0	0.9	0.982	0.998
F3	TFPI	9606.ENSP00000334145	9606.ENSP00000233156	0	0	0	0	0	0	0.6	0.972	0.988
F3	PLG	9606.ENSP00000334145	9606.ENSP00000308938	0	0	0	0	0	0.27	0	0.876	0.905
F3	F5	9606.ENSP00000334145	9606.ENSP00000356771	0	0	0	0	0	0	0.9	0.602	0.958
F3	SERPINC1	9606.ENSP00000334145	9606.ENSP00000356671	0	0	0	0	0	0	0	0.968	0.968
F3	F7	9606.ENSP00000334145	9606.ENSP00000364731	0	0	0	0	0	0.978	0.9	0.99	0.999
F5	SERPINC1	9606.ENSP00000356771	9606.ENSP00000356671	0	0	0	0	0	0.113	0.9	0.686	0.969
F7	F9	9606.ENSP00000364731	9606.ENSP00000218099	0	0	0	0.897	0	0.213	0.9	0.917	0.925
F7	TFPI	9606.ENSP00000364731	9606.ENSP00000233156	0	0	0	0	0	0.143	0.9	0.777	0.979
F7	SERPINC1	9606.ENSP00000364731	9606.ENSP00000356671	0	0	0	0	0	0.12	0	0.978	0.979
F9	SERPINC1	9606.ENSP00000218099	9606.ENSP00000356671	0	0	0	0	0	0.933	0.9	0.947	0.999
PLG	SERPINC1	9606.ENSP00000308938	9606.ENSP00000356671	0	0	0	0	0	0.391	0	0.917	0.947
FOXP4	HAND1	9606.ENSP00000362151	9606.ENSP00000231121	0	0	0	0	0	0.076	0	0.92	0.922
ADAM17	NOTCH1	9606.ENSP00000309968	9606.ENSP00000277541	0	0	0	0	0	0.3	0.9	0.71	0.977
ADAM17	FURIN	9606.ENSP00000309968	9606.ENSP00000483552	0	0	0	0	0	0	0.9	0.688	0.967
ANTXR1	ANTXR2	9606.ENSP00000301945	9606.ENSP00000306185	0	0	0	0.953	0	0	0.9	0.99	0.904
ANTXR1	FURIN	9606.ENSP00000301945	9606.ENSP00000483552	0	0	0	0	0	0	0.9	0.687	0.967
ANTXR2	FURIN	9606.ENSP00000306185	9606.ENSP00000483552	0	0	0	0	0	0	0.9	0.767	0.975
BACE1	FURIN	9606.ENSP00000318585	9606.ENSP00000483552	0	0	0	0	0	0.379	0.9	0.5	0.966
COL23A1	FURIN	9606.ENSP00000375069	9606.ENSP00000483552	0	0	0	0	0	0.287	0.9	0.54	0.964
FBN1	FURIN	9606.ENSP00000325527	9606.ENSP00000483552	0	0	0	0	0	0	0.9	0.476	0.945
FURIN	NOTCH1	9606.ENSP00000483552	9606.ENSP00000277541	0	0	0	0	0	0.213	0.9	0.745	0.978
FURIN	MMP14	9606.ENSP00000483552	9606.ENSP00000308208	0	0	0	0	0	0.675	0.9	0.858	0.995
FURIN	PACS1	9606.ENSP00000483552	9606.ENSP00000316454	0	0	0	0	0	0.462	0	0.969	0.982
FURIN	NGF	9606.ENSP00000483552	9606.ENSP00000358525	0	0	0	0	0	0.057	0.9	0.48	0.946
FYCO1	RAB7A	9606.ENSP00000296137	9606.ENSP00000265062	0	0	0	0	0	0	0.8	0.969	0.993
FYCO1	MAP1LC3B	9606.ENSP00000296137	9606.ENSP00000268607	0	0	0	0	0	0.871	0	0.739	0.965
FYCO1	MAP1LC3A	9606.ENSP00000296137	9606.ENSP00000363970	0	0	0	0	0	0.747	0	0.827	0.954
FYCO1	RAB7B	9606.ENSP00000296137	9606.ENSP00000479762	0	0	0	0	0	0	0.8	0.988	0.997
MAP1LC3A	MAP1LC3B	9606.ENSP00000363970	9606.ENSP00000268607	0	0	0	0.971	0	0.492	0.9	0.916	0.948
RAB7A	RAB7B	9606.ENSP00000265062	9606.ENSP00000479762	0	0	0	0.93	0	0	0.9	0.873	0.906
CUBN	LRP2	9606.ENSP00000367064	9606.ENSP00000263816	0	0	0	0	0	0.287	0.9	0.992	0.999
CUBN	LGMN	9606.ENSP00000367064	9606.ENSP00000376911	0	0	0	0	0	0	0.9	0.161	0.912
CUBN	GC	9606.ENSP00000367064	9606.ENSP00000421725	0	0	0	0	0	0.27	0.8	0.897	0.983
GC	LRP2	9606.ENSP00000421725	9606.ENSP00000263816	0	0	0	0	0	0.27	0.9	0.986	0.998
GC	LGMN	9606.ENSP00000421725	9606.ENSP00000376911	0	0	0	0	0	0	0.9	0.085	0.904
GC	VDR	9606.ENSP00000421725	9606.ENSP00000447173	0	0	0	0	0	0.058	0	0.975	0.975
COG1	GOLGA3	9606.ENSP00000299886	9606.ENSP00000204726	0	0	0	0	0	0	0.9	0.062	0.902
COG1	COG3	9606.ENSP00000299886	9606.ENSP00000258654	0	0	0	0	0	0.92	0.9	0.978	0.999
COG1	COG5	9606.ENSP00000299886	9606.ENSP00000297135	0	0	0	0	0	0.97	0.9	0.991	0.999
COG1	COG2	9606.ENSP00000299886	9606.ENSP00000355629	0	0	0	0	0	0.884	0.9	0.982	0.999
COG1	COG4	9606.ENSP00000299886	9606.ENSP00000315775	0	0	0	0	0	0.88	0.9	0.983	0.999
COG1	COG6	9606.ENSP00000299886	9606.ENSP00000397441	0	0	0	0	0	0.882	0.9	0.933	0.999
COG1	COG8	9606.ENSP00000299886	9606.ENSP00000305459	0	0	0	0	0	0.952	0.9	0.994	0.999
COG1	COG7	9606.ENSP00000299886	9606.ENSP00000305442	0	0	0	0	0	0.884	0.9	0.958	0.999
COG2	GOLGA3	9606.ENSP00000355629	9606.ENSP00000204726	0	0	0	0	0	0	0.9	0.243	0.921
COG2	COG3	9606.ENSP00000355629	9606.ENSP00000258654	0	0	0	0	0	0.943	0.9	0.987	0.999
COG2	COG5	9606.ENSP00000355629	9606.ENSP00000297135	0	0	0	0	0	0.879	0.9	0.965	0.999
COG2	COG7	9606.ENSP00000355629	9606.ENSP00000305442	0	0	0	0	0	0.884	0.9	0.957	0.999
COG2	COG8	9606.ENSP00000355629	9606.ENSP00000305459	0	0	0	0	0	0.87	0.9	0.894	0.998
COG2	COG4	9606.ENSP00000355629	9606.ENSP00000315775	0	0	0	0	0	0.918	0.9	0.96	0.999
COG2	COG6	9606.ENSP00000355629	9606.ENSP00000397441	0	0	0	0	0	0.885	0.9	0.945	0.999
COG3	GOLGA3	9606.ENSP00000258654	9606.ENSP00000204726	0	0	0	0	0	0	0.9	0.47	0.944
COG3	COG8	9606.ENSP00000258654	9606.ENSP00000305459	0	0	0	0	0	0.94	0.9	0.922	0.999
COG3	COG4	9606.ENSP00000258654	9606.ENSP00000315775	0	0	0	0	0	0.976	0.9	0.984	0.999
COG3	COG6	9606.ENSP00000258654	9606.ENSP00000397441	0	0	0	0	0	0.97	0.9	0.9	0.999
COG3	COG7	9606.ENSP00000258654	9606.ENSP00000305442	0	0	0	0	0	0.909	0.9	0.964	0.999
COG3	COG5	9606.ENSP00000258654	9606.ENSP00000297135	0	0	0	0	0	0.897	0.9	0.972	0.999
COG4	GOLGA3	9606.ENSP00000315775	9606.ENSP00000204726	0	0	0	0	0	0	0.9	0.049	0.9
COG4	COG5	9606.ENSP00000315775	9606.ENSP00000297135	0	0	0	0	0	0.882	0.9	0.919	0.998
COG4	COG7	9606.ENSP00000315775	9606.ENSP00000305442	0	0	0	0	0	0.892	0.9	0.922	0.999
COG4	COG8	9606.ENSP00000315775	9606.ENSP00000305459	0	0	0	0	0	0.914	0.9	0.941	0.999
COG4	COG6	9606.ENSP00000315775	9606.ENSP00000397441	0	0	0	0	0	0.929	0.9	0.928	0.999
COG5	GOLGA3	9606.ENSP00000297135	9606.ENSP00000204726	0	0	0	0	0	0	0.9	0.049	0.9
COG5	COG7	9606.ENSP00000297135	9606.ENSP00000305442	0	0	0	0	0	0.897	0.9	0.992	0.999
COG5	COG8	9606.ENSP00000297135	9606.ENSP00000305459	0	0	0	0	0	0.952	0.9	0.983	0.999
COG5	COG6	9606.ENSP00000297135	9606.ENSP00000397441	0	0	0	0	0	0.87	0.9	0.949	0.999
COG6	GOLGA3	9606.ENSP00000397441	9606.ENSP00000204726	0	0	0	0	0	0	0.9	0.062	0.902
COG6	COG7	9606.ENSP00000397441	9606.ENSP00000305442	0	0	0	0	0	0.882	0.9	0.941	0.999
COG6	COG8	9606.ENSP00000397441	9606.ENSP00000305459	0	0	0	0	0	0.963	0.9	0.968	0.999
COG7	GOLGA3	9606.ENSP00000305442	9606.ENSP00000204726	0	0	0	0	0	0	0.9	0	0.9
COG7	COG8	9606.ENSP00000305442	9606.ENSP00000305459	0	0	0	0	0	0.749	0.9	0.94	0.998
COG8	GOLGA3	9606.ENSP00000305459	9606.ENSP00000204726	0	0	0	0	0	0	0.9	0.061	0.902
GOLGA3	TSNAX	9606.ENSP00000204726	9606.ENSP00000355599	0	0	0	0	0	0.692	0	0.795	0.934
GOLGA3	RAB28	9606.ENSP00000204726	9606.ENSP00000328551	0	0	0	0	0	0.941	0	0.105	0.944
AQP4	GRM5	9606.ENSP00000372654	9606.ENSP00000306138	0	0	0	0	0	0	0	0.934	0.934
CASR	GNAQ	9606.ENSP00000420194	9606.ENSP00000286548	0	0	0	0	0	0	0.8	0.928	0.985
CASR	GRM5	9606.ENSP00000420194	9606.ENSP00000306138	0	0	0	0.724	0	0.84	0.5	0.526	0.928
CASR	GRM1	9606.ENSP00000420194	9606.ENSP00000354896	0	0	0	0.713	0	0.955	0.5	0.663	0.98
DLG4	GRM5	9606.ENSP00000382428	9606.ENSP00000306138	0	0	0	0	0	0.153	0.6	0.854	0.946
DLG4	HOMER1	9606.ENSP00000382428	9606.ENSP00000334382	0	0	0	0	0	0.149	0.6	0.935	0.976
ENSP00000480012	GRM5	9606.ENSP00000480012	9606.ENSP00000306138	0	0	0	0	0	0.119	0	0.984	0.985
ESR1	GNAQ	9606.ENSP00000405330	9606.ENSP00000286548	0	0	0	0	0	0.056	0.9	0.382	0.936
ESR1	GRM5	9606.ENSP00000405330	9606.ENSP00000306138	0	0	0	0	0	0	0	0.952	0.952
ESR1	GRM1	9606.ENSP00000405330	9606.ENSP00000354896	0	0	0	0	0	0	0	0.969	0.969
GNAQ	GRM1	9606.ENSP00000286548	9606.ENSP00000354896	0	0	0	0	0	0	0.8	0.975	0.994
GNAQ	GRM5	9606.ENSP00000286548	9606.ENSP00000306138	0	0	0	0	0	0	0.8	0.989	0.997
GRM1	HOMER2	9606.ENSP00000354896	9606.ENSP00000305632	0	0	0	0	0	0.371	0.8	0.763	0.967
GRM1	GRM5	9606.ENSP00000354896	9606.ENSP00000306138	0	0	0	0.961	0	0.787	0.8	0.963	0.957
GRM1	HOMER1	9606.ENSP00000354896	9606.ENSP00000334382	0	0	0	0	0	0.646	0.8	0.938	0.995
GRM5	HOMER2	9606.ENSP00000306138	9606.ENSP00000305632	0	0	0	0	0	0.234	0.6	0.811	0.937
GRM5	PRNP	9606.ENSP00000306138	9606.ENSP00000368752	0	0	0	0	0	0.361	0	0.975	0.983
GRM5	HOMER1	9606.ENSP00000306138	9606.ENSP00000334382	0	0	0	0	0	0.58	0.6	0.989	0.998
HOMER1	HOMER2	9606.ENSP00000334382	9606.ENSP00000305632	0	0	0	0.94	0	0.88	0.8	0.915	0.976
AGL	PYGM	9606.ENSP00000294724	9606.ENSP00000164139	0	0	0	0	0	0	0.9	0.783	0.977
AGL	PYGB	9606.ENSP00000294724	9606.ENSP00000216962	0	0	0	0	0	0	0.9	0.749	0.973
AGL	UGP2	9606.ENSP00000294724	9606.ENSP00000338703	0	0	0	0	0	0	0.9	0.585	0.956
AGL	GYG1	9606.ENSP00000294724	9606.ENSP00000340736	0	0	0	0	0	0	0.9	0.692	0.967
AGL	GBE1	9606.ENSP00000294724	9606.ENSP00000410833	0	0	0	0	0	0	0.9	0.867	0.986
GBE1	PYGM	9606.ENSP00000410833	9606.ENSP00000164139	0	0	0	0	0	0.272	0.9	0.708	0.976
GBE1	PYGB	9606.ENSP00000410833	9606.ENSP00000216962	0	0	0	0	0	0.272	0.9	0.706	0.976
GBE1	GYS2	9606.ENSP00000410833	9606.ENSP00000261195	0	0	0	0	0	0	0.9	0.808	0.98
GBE1	GYS1	9606.ENSP00000410833	9606.ENSP00000317904	0	0	0	0	0	0.684	0.9	0.849	0.994
GBE1	GYG1	9606.ENSP00000410833	9606.ENSP00000340736	0	0	0	0	0	0.676	0.9	0.809	0.993
GYG1	PYGM	9606.ENSP00000340736	9606.ENSP00000164139	0	0	0	0	0	0.056	0.9	0.526	0.951
GYG1	PYGB	9606.ENSP00000340736	9606.ENSP00000216962	0	0	0	0	0	0.056	0.9	0.535	0.952
GYG1	PPP1R3C	9606.ENSP00000340736	9606.ENSP00000238994	0	0	0	0	0	0.768	0.8	0.542	0.976
GYG1	GYS2	9606.ENSP00000340736	9606.ENSP00000261195	0	0	0	0	0	0.693	0.8	0.676	0.978
GYG1	TRIM7	9606.ENSP00000340736	9606.ENSP00000274773	0	0	0	0	0	0.486	0	0.909	0.951
GYG1	GYS1	9606.ENSP00000340736	9606.ENSP00000317904	0	0	0	0	0	0.916	0.8	0.813	0.996
GYG1	UGP2	9606.ENSP00000340736	9606.ENSP00000338703	0	0	0	0	0	0	0.9	0.618	0.96
GYG1	NHLRC1	9606.ENSP00000340736	9606.ENSP00000345464	0	0	0	0	0	0	0.9	0.52	0.949
GYS1	PPP1R3C	9606.ENSP00000317904	9606.ENSP00000238994	0	0	0	0	0	0.79	0.8	0.765	0.989
GYS1	UGP2	9606.ENSP00000317904	9606.ENSP00000338703	0	0	0	0	0	0	0.9	0.771	0.976
GYS1	NHLRC1	9606.ENSP00000317904	9606.ENSP00000345464	0	0	0	0	0	0.494	0.9	0.721	0.984
GYS2	PPP1R3C	9606.ENSP00000261195	9606.ENSP00000238994	0	0	0	0	0	0.828	0.8	0.465	0.98
GYS2	NHLRC1	9606.ENSP00000261195	9606.ENSP00000345464	0	0	0	0	0	0.056	0.9	0.294	0.927
GYS2	UGP2	9606.ENSP00000261195	9606.ENSP00000338703	0	0	0	0	0	0	0.9	0.729	0.971
NHLRC1	PPP1R3C	9606.ENSP00000345464	9606.ENSP00000238994	0	0	0	0	0	0.466	0.9	0.7	0.982
PYGB	PYGM	9606.ENSP00000216962	9606.ENSP00000164139	0	0	0	0.983	0	0.658	0.8	0.674	0.929
PYGB	UGP2	9606.ENSP00000216962	9606.ENSP00000338703	0	0	0	0	0	0	0.9	0.638	0.962
PYGM	UGP2	9606.ENSP00000164139	9606.ENSP00000338703	0	0	0	0	0	0	0.9	0.553	0.953
B2M	LILRB1	9606.ENSP00000452780	9606.ENSP00000315997	0	0	0	0	0	0.95	0.6	0.938	0.998
B2M	KLRD1	9606.ENSP00000452780	9606.ENSP00000371333	0	0	0	0	0	0.928	0.9	0.538	0.996
B2M	KIR3DL1	9606.ENSP00000452780	9606.ENSP00000375608	0	0	0	0	0	0.878	0.6	0.503	0.973
B2M	LILRB2	9606.ENSP00000452780	9606.ENSP00000375629	0	0	0	0	0	0.973	0.6	0.718	0.996
B2M	CD8A	9606.ENSP00000452780	9606.ENSP00000386559	0	0	0	0	0	0.935	0.9	0.863	0.999
B2M	HLA-G	9606.ENSP00000452780	9606.ENSP00000412927	0	0	0	0	0	0.982	0.8	0.963	0.999
B2M	KLRC1	9606.ENSP00000452780	9606.ENSP00000438038	0	0	0	0	0	0.945	0.9	0.513	0.997
CD160	HLA-G	9606.ENSP00000235933	9606.ENSP00000412927	0	0	0	0	0	0	0.6	0.942	0.975
CD8A	HLA-G	9606.ENSP00000386559	9606.ENSP00000412927	0	0	0	0	0	0.711	0.6	0.908	0.988
HLA-G	STAC	9606.ENSP00000412927	9606.ENSP00000273183	0	0	0	0	0	0	0	0.946	0.946
HLA-G	LILRB1	9606.ENSP00000412927	9606.ENSP00000315997	0	0	0	0	0	0.962	0.6	0.989	0.999
HLA-G	KIR2DL4	9606.ENSP00000412927	9606.ENSP00000339634	0	0	0	0	0	0.282	0.6	0.989	0.996
HLA-G	KLRD1	9606.ENSP00000412927	9606.ENSP00000371333	0	0	0	0	0	0.225	0.6	0.906	0.968
HLA-G	KIR3DL1	9606.ENSP00000412927	9606.ENSP00000375608	0	0	0	0	0	0.057	0.8	0.889	0.977
HLA-G	LILRB2	9606.ENSP00000412927	9606.ENSP00000375629	0	0	0	0	0	0.972	0.6	0.989	0.999
HLA-G	KLRC1	9606.ENSP00000412927	9606.ENSP00000438038	0	0	0	0	0	0.68	0.6	0.895	0.985
KIR3DL1	KLRD1	9606.ENSP00000375608	9606.ENSP00000371333	0	0	0	0	0	0	0.8	0.851	0.968
KIR3DL1	KLRC1	9606.ENSP00000375608	9606.ENSP00000438038	0	0	0	0	0	0	0.8	0.861	0.971
KLRC1	KLRD1	9606.ENSP00000438038	9606.ENSP00000371333	0	0	0	0.78	0	0.973	0.9	0.994	0.997
IFI6	ISG20	9606.ENSP00000342513	9606.ENSP00000306565	0	0	0	0	0	0	0.9	0.608	0.959
IFI6	IFITM3	9606.ENSP00000342513	9606.ENSP00000382707	0	0	0	0	0	0	0.9	0.624	0.96
IFI6	IFIT2	9606.ENSP00000342513	9606.ENSP00000360891	0	0	0	0	0	0	0.9	0.637	0.962
IFI6	IRF7	9606.ENSP00000342513	9606.ENSP00000380697	0	0	0	0	0	0	0.9	0.603	0.958
IFI6	RSAD2	9606.ENSP00000342513	9606.ENSP00000371471	0	0	0	0	0	0	0.9	0.653	0.963
IFI6	IFIT3	9606.ENSP00000342513	9606.ENSP00000360883	0	0	0	0	0	0	0.9	0.681	0.966
IFI6	IFIT1	9606.ENSP00000342513	9606.ENSP00000360869	0	0	0	0	0	0	0.9	0.707	0.969
IFI6	MX1	9606.ENSP00000342513	9606.ENSP00000381601	0	0	0	0	0	0	0.9	0.69	0.967
IFI6	ISG15	9606.ENSP00000342513	9606.ENSP00000368699	0	0	0	0	0	0	0.9	0.715	0.97
IFIT1	ISG20	9606.ENSP00000360869	9606.ENSP00000306565	0	0	0	0	0	0	0.9	0.732	0.972
IFIT1	IFITM3	9606.ENSP00000360869	9606.ENSP00000382707	0	0	0	0	0	0	0.9	0.674	0.966
IFIT1	IRF7	9606.ENSP00000360869	9606.ENSP00000380697	0	0	0	0	0	0	0.9	0.795	0.978
IFIT1	ISG15	9606.ENSP00000360869	9606.ENSP00000368699	0	0	0	0	0	0.16	0.6	0.884	0.957
IFIT1	IFIT2	9606.ENSP00000360869	9606.ENSP00000360891	0	0	0	0.915	0	0.66	0.9	0.976	0.967
IFIT1	MX1	9606.ENSP00000360869	9606.ENSP00000381601	0	0	0	0	0	0	0.5	0.883	0.939
IFIT1	RSAD2	9606.ENSP00000360869	9606.ENSP00000371471	0	0	0	0	0	0.154	0.9	0.833	0.984
IFIT1	IFIT3	9606.ENSP00000360869	9606.ENSP00000360883	0	0	0	0.898	0	0.974	0.9	0.965	0.997
IFIT2	ISG20	9606.ENSP00000360891	9606.ENSP00000306565	0	0	0	0	0	0	0.9	0.707	0.969
IFIT2	IFIT3	9606.ENSP00000360891	9606.ENSP00000360883	0	0	0	0.945	0	0.875	0.9	0.954	0.987
IFIT2	IFITM3	9606.ENSP00000360891	9606.ENSP00000382707	0	0	0	0	0	0	0.9	0.635	0.962
IFIT2	IRF7	9606.ENSP00000360891	9606.ENSP00000380697	0	0	0	0	0	0	0.9	0.693	0.968
IFIT2	MX1	9606.ENSP00000360891	9606.ENSP00000381601	0	0	0	0	0	0	0.9	0.772	0.976
IFIT2	RSAD2	9606.ENSP00000360891	9606.ENSP00000371471	0	0	0	0	0	0.154	0.9	0.726	0.974
IFIT2	ISG15	9606.ENSP00000360891	9606.ENSP00000368699	0	0	0	0	0	0.16	0.9	0.794	0.981
IFIT3	ISG20	9606.ENSP00000360883	9606.ENSP00000306565	0	0	0	0	0	0	0.9	0.66	0.964
IFIT3	IFITM3	9606.ENSP00000360883	9606.ENSP00000382707	0	0	0	0	0	0	0.9	0.625	0.96
IFIT3	IRF7	9606.ENSP00000360883	9606.ENSP00000380697	0	0	0	0	0	0	0.9	0.683	0.966
IFIT3	MX1	9606.ENSP00000360883	9606.ENSP00000381601	0	0	0	0	0	0	0.9	0.763	0.975
IFIT3	ISG15	9606.ENSP00000360883	9606.ENSP00000368699	0	0	0	0	0	0.16	0.9	0.792	0.981
IFIT3	RSAD2	9606.ENSP00000360883	9606.ENSP00000371471	0	0	0	0	0	0.398	0.9	0.716	0.981
IFITM3	ISG20	9606.ENSP00000382707	9606.ENSP00000306565	0	0	0	0	0	0	0.9	0.61	0.959
IFITM3	VAPA	9606.ENSP00000382707	9606.ENSP00000345656	0	0	0	0	0	0	0	0.965	0.965
IFITM3	ISG15	9606.ENSP00000382707	9606.ENSP00000368699	0	0	0	0	0	0	0.9	0.676	0.966
IFITM3	RSAD2	9606.ENSP00000382707	9606.ENSP00000371471	0	0	0	0	0	0	0.9	0.722	0.971
IFITM3	IRF7	9606.ENSP00000382707	9606.ENSP00000380697	0	0	0	0	0	0	0.9	0.643	0.962
IFITM3	MX1	9606.ENSP00000382707	9606.ENSP00000381601	0	0	0	0	0	0	0.9	0.716	0.97
IRF7	ISG20	9606.ENSP00000380697	9606.ENSP00000306565	0	0	0	0	0	0	0.9	0.675	0.966
IRF7	ISG15	9606.ENSP00000380697	9606.ENSP00000368699	0	0	0	0	0	0	0.9	0.844	0.983
IRF7	RSAD2	9606.ENSP00000380697	9606.ENSP00000371471	0	0	0	0	0	0.182	0.9	0.836	0.985
IRF7	MX1	9606.ENSP00000380697	9606.ENSP00000381601	0	0	0	0	0	0	0.9	0.824	0.981
ISG15	ISG20	9606.ENSP00000368699	9606.ENSP00000306565	0	0	0	0	0	0	0.9	0.718	0.97
ISG15	MX1	9606.ENSP00000368699	9606.ENSP00000381601	0	0	0	0	0	0.149	0.6	0.88	0.955
ISG15	RSAD2	9606.ENSP00000368699	9606.ENSP00000371471	0	0	0	0	0	0	0.9	0.883	0.987
ISG20	RSAD2	9606.ENSP00000306565	9606.ENSP00000371471	0	0	0	0	0	0	0.9	0.67	0.965
ISG20	MX1	9606.ENSP00000306565	9606.ENSP00000381601	0	0	0	0	0	0	0.9	0.698	0.968
MX1	RSAD2	9606.ENSP00000381601	9606.ENSP00000371471	0	0	0	0	0	0	0.9	0.831	0.982
RSAD2	VAPA	9606.ENSP00000371471	9606.ENSP00000345656	0	0	0	0	0	0.651	0	0.94	0.978
IFNA1	IFNAR1	9606.ENSP00000276927	9606.ENSP00000270139	0	0	0	0	0	0.213	0.6	0.989	0.996
IFNA1	TYK2	9606.ENSP00000276927	9606.ENSP00000431885	0	0	0	0	0	0	0	0.933	0.933
IFNA1	JAK1	9606.ENSP00000276927	9606.ENSP00000343204	0	0	0	0	0	0	0.6	0.915	0.964
IFNA1	IFNAR2	9606.ENSP00000276927	9606.ENSP00000343957	0	0	0	0	0	0.27	0.6	0.988	0.996
IFNA2	IFNAR1	9606.ENSP00000369554	9606.ENSP00000270139	0	0	0	0	0	0.967	0.9	0.804	0.999
IFNA2	IFNAR2	9606.ENSP00000369554	9606.ENSP00000343957	0	0	0	0	0	0.973	0.9	0.899	0.999
IFNAR1	IFNW1	9606.ENSP00000270139	9606.ENSP00000369578	0	0	0	0	0	0.932	0.8	0.472	0.992
IFNAR1	STAT1	9606.ENSP00000270139	9606.ENSP00000354394	0	0	0	0	0	0.345	0.9	0.984	0.998
IFNAR1	TYK2	9606.ENSP00000270139	9606.ENSP00000431885	0	0	0	0	0	0.972	0.9	0.99	0.999
IFNAR1	IFNAR2	9606.ENSP00000270139	9606.ENSP00000343957	0	0	0	0	0	0.944	0.9	0.989	0.999
IFNAR1	IFNB1	9606.ENSP00000270139	9606.ENSP00000369581	0	0	0	0	0	0.752	0.9	0.989	0.999
IFNAR1	STAT2	9606.ENSP00000270139	9606.ENSP00000315768	0	0	0	0	0	0.873	0.9	0.986	0.999
IFNAR1	JAK1	9606.ENSP00000270139	9606.ENSP00000343204	0	0	0	0	0	0.281	0.9	0.989	0.999
IFNAR2	USP18	9606.ENSP00000343957	9606.ENSP00000215794	0	0	0	0	0	0.675	0.8	0.988	0.999
IFNAR2	STAT2	9606.ENSP00000343957	9606.ENSP00000315768	0	0	0	0	0	0.837	0.9	0.963	0.999
IFNAR2	JAK1	9606.ENSP00000343957	9606.ENSP00000343204	0	0	0	0	0	0.486	0.9	0.989	0.999
IFNAR2	IFNW1	9606.ENSP00000343957	9606.ENSP00000369578	0	0	0	0	0	0.927	0.8	0.511	0.992
IFNAR2	STAT1	9606.ENSP00000343957	9606.ENSP00000354394	0	0	0	0	0	0.501	0.9	0.918	0.995
IFNAR2	IFNB1	9606.ENSP00000343957	9606.ENSP00000369581	0	0	0	0	0	0.27	0.9	0.986	0.998
IFNAR2	TYK2	9606.ENSP00000343957	9606.ENSP00000431885	0	0	0	0	0	0.213	0.9	0.988	0.998
IFNB1	STAT2	9606.ENSP00000369581	9606.ENSP00000315768	0	0	0	0	0	0	0.9	0.821	0.981
IFNB1	JAK1	9606.ENSP00000369581	9606.ENSP00000343204	0	0	0	0	0	0	0.9	0.683	0.966
IFNB1	STAT1	9606.ENSP00000369581	9606.ENSP00000354394	0	0	0	0	0	0	0.9	0.855	0.984
IFNB1	TYK2	9606.ENSP00000369581	9606.ENSP00000431885	0	0	0	0	0	0	0.9	0.69	0.967
JAK1	USP18	9606.ENSP00000343204	9606.ENSP00000215794	0	0	0	0	0	0.058	0.9	0.591	0.958
JAK1	STAT2	9606.ENSP00000343204	9606.ENSP00000315768	0	0	0	0	0	0.294	0.9	0.891	0.991
JAK1	TYK2	9606.ENSP00000343204	9606.ENSP00000431885	0	0	0	0.926	0	0.462	0.9	0.992	0.948
JAK1	STAT1	9606.ENSP00000343204	9606.ENSP00000354394	0	0	0	0	0	0.711	0.9	0.99	0.999
STAT1	USP18	9606.ENSP00000354394	9606.ENSP00000215794	0	0	0	0	0	0	0.9	0.672	0.965
STAT1	STAT2	9606.ENSP00000354394	9606.ENSP00000315768	0	0	0	0.889	0	0.881	0.9	0.992	0.988
STAT1	TYK2	9606.ENSP00000354394	9606.ENSP00000431885	0	0	0	0	0	0.518	0.9	0.912	0.995
STAT2	USP18	9606.ENSP00000315768	9606.ENSP00000215794	0	0	0	0	0	0.486	0	0.837	0.912
STAT2	TYK2	9606.ENSP00000315768	9606.ENSP00000431885	0	0	0	0	0	0.294	0.9	0.918	0.993
CCL2	IL4	9606.ENSP00000225831	9606.ENSP00000231449	0	0	0	0	0	0	0.9	0.86	0.985
CCL2	CXCL1	9606.ENSP00000225831	9606.ENSP00000379110	0	0	0	0	0	0	0.9	0.883	0.987
CCL2	TNF	9606.ENSP00000225831	9606.ENSP00000398698	0	0	0	0	0	0	0.9	0.93	0.992
CCL2	IL1B	9606.ENSP00000225831	9606.ENSP00000263341	0	0	0	0	0	0	0.9	0.927	0.992
CCL2	IL6	9606.ENSP00000225831	9606.ENSP00000385675	0	0	0	0	0	0	0.9	0.93	0.992
CCL2	CXCL8	9606.ENSP00000225831	9606.ENSP00000306512	0	0	0	0	0	0.28	0.9	0.923	0.993
CXCL1	IL1B	9606.ENSP00000379110	9606.ENSP00000263341	0	0	0	0	0	0	0.9	0.922	0.991
CXCL1	TNF	9606.ENSP00000379110	9606.ENSP00000398698	0	0	0	0	0	0	0.9	0.863	0.985
CXCL1	IL6	9606.ENSP00000379110	9606.ENSP00000385675	0	0	0	0	0	0	0.9	0.925	0.992
CXCL8	IL4	9606.ENSP00000306512	9606.ENSP00000231449	0	0	0	0	0	0	0.9	0.873	0.986
CXCL8	IL1B	9606.ENSP00000306512	9606.ENSP00000263341	0	0	0	0	0	0	0.9	0.948	0.994
CXCL8	STAT3	9606.ENSP00000306512	9606.ENSP00000264657	0	0	0	0	0	0	0.65	0.732	0.902
CXCL8	TNF	9606.ENSP00000306512	9606.ENSP00000398698	0	0	0	0	0	0	0.9	0.921	0.991
CXCL8	IL6	9606.ENSP00000306512	9606.ENSP00000385675	0	0	0	0	0	0	0.9	0.947	0.994
IL17A	IL4	9606.ENSP00000344192	9606.ENSP00000231449	0	0	0	0	0	0	0	0.914	0.914
IL17A	IL1B	9606.ENSP00000344192	9606.ENSP00000263341	0	0	0	0	0	0	0	0.948	0.948
IL17A	STAT3	9606.ENSP00000344192	9606.ENSP00000264657	0	0	0	0	0	0.73	0.9	0.813	0.994
IL17A	TNF	9606.ENSP00000344192	9606.ENSP00000398698	0	0	0	0	0	0	0	0.989	0.989
IL17A	IL6	9606.ENSP00000344192	9606.ENSP00000385675	0	0	0	0	0	0	0.9	0.949	0.994
IL1B	IL4	9606.ENSP00000263341	9606.ENSP00000231449	0	0	0	0	0	0	0.9	0.91	0.99
IL1B	STAT3	9606.ENSP00000263341	9606.ENSP00000264657	0	0	0	0	0	0	0.65	0.831	0.938
IL1B	TNF	9606.ENSP00000263341	9606.ENSP00000398698	0	0	0	0	0	0	0.5	0.942	0.969
IL1B	IL6	9606.ENSP00000263341	9606.ENSP00000385675	0	0	0	0	0	0	0.9	0.953	0.995
IL4	IL6	9606.ENSP00000231449	9606.ENSP00000385675	0	0	0	0	0	0	0.9	0.916	0.991
IL4	TNF	9606.ENSP00000231449	9606.ENSP00000398698	0	0	0	0	0	0	0.9	0.933	0.993
IL6	STAT3	9606.ENSP00000385675	9606.ENSP00000264657	0	0	0	0	0	0.182	0.9	0.917	0.992
IL6	IL6R	9606.ENSP00000385675	9606.ENSP00000357470	0	0	0	0	0	0.978	0.9	0.989	0.999
IL6	IL6ST	9606.ENSP00000385675	9606.ENSP00000370698	0	0	0	0	0	0.974	0.9	0.988	0.999
IL6	TNF	9606.ENSP00000385675	9606.ENSP00000398698	0	0	0	0	0	0	0.9	0.941	0.993
IL6R	STAT3	9606.ENSP00000357470	9606.ENSP00000264657	0	0	0	0	0	0.27	0.9	0.832	0.986
IL6R	IL6ST	9606.ENSP00000357470	9606.ENSP00000370698	0	0	0	0.559	0	0.901	0.9	0.977	0.994
IL6ST	STAT3	9606.ENSP00000370698	9606.ENSP00000264657	0	0	0	0	0	0.317	0.9	0.819	0.986
STAT3	TNF	9606.ENSP00000264657	9606.ENSP00000398698	0	0	0	0	0	0	0.65	0.839	0.941
CCL2	IL4	9606.ENSP00000225831	9606.ENSP00000231449	0	0	0	0	0	0	0.9	0.86	0.985
CCL2	CXCL1	9606.ENSP00000225831	9606.ENSP00000379110	0	0	0	0	0	0	0.9	0.883	0.987
CCL2	TNF	9606.ENSP00000225831	9606.ENSP00000398698	0	0	0	0	0	0	0.9	0.93	0.992
CCL2	IL1B	9606.ENSP00000225831	9606.ENSP00000263341	0	0	0	0	0	0	0.9	0.927	0.992
CCL2	IL6	9606.ENSP00000225831	9606.ENSP00000385675	0	0	0	0	0	0	0.9	0.93	0.992
CCL2	CXCL8	9606.ENSP00000225831	9606.ENSP00000306512	0	0	0	0	0	0.28	0.9	0.923	0.993
CXCL1	IL1B	9606.ENSP00000379110	9606.ENSP00000263341	0	0	0	0	0	0	0.9	0.922	0.991
CXCL1	TNF	9606.ENSP00000379110	9606.ENSP00000398698	0	0	0	0	0	0	0.9	0.863	0.985
CXCL1	IL6	9606.ENSP00000379110	9606.ENSP00000385675	0	0	0	0	0	0	0.9	0.925	0.992
CXCL8	IL4	9606.ENSP00000306512	9606.ENSP00000231449	0	0	0	0	0	0	0.9	0.873	0.986
CXCL8	IL1B	9606.ENSP00000306512	9606.ENSP00000263341	0	0	0	0	0	0	0.9	0.948	0.994
CXCL8	STAT3	9606.ENSP00000306512	9606.ENSP00000264657	0	0	0	0	0	0	0.65	0.732	0.902
CXCL8	TNF	9606.ENSP00000306512	9606.ENSP00000398698	0	0	0	0	0	0	0.9	0.921	0.991
CXCL8	IL6	9606.ENSP00000306512	9606.ENSP00000385675	0	0	0	0	0	0	0.9	0.947	0.994
IL17A	IL4	9606.ENSP00000344192	9606.ENSP00000231449	0	0	0	0	0	0	0	0.914	0.914
IL17A	IL1B	9606.ENSP00000344192	9606.ENSP00000263341	0	0	0	0	0	0	0	0.948	0.948
IL17A	STAT3	9606.ENSP00000344192	9606.ENSP00000264657	0	0	0	0	0	0.73	0.9	0.813	0.994
IL17A	TNF	9606.ENSP00000344192	9606.ENSP00000398698	0	0	0	0	0	0	0	0.989	0.989
IL17A	IL6	9606.ENSP00000344192	9606.ENSP00000385675	0	0	0	0	0	0	0.9	0.949	0.994
IL1B	IL4	9606.ENSP00000263341	9606.ENSP00000231449	0	0	0	0	0	0	0.9	0.91	0.99
IL1B	STAT3	9606.ENSP00000263341	9606.ENSP00000264657	0	0	0	0	0	0	0.65	0.831	0.938
IL1B	TNF	9606.ENSP00000263341	9606.ENSP00000398698	0	0	0	0	0	0	0.5	0.942	0.969
IL1B	IL6	9606.ENSP00000263341	9606.ENSP00000385675	0	0	0	0	0	0	0.9	0.953	0.995
IL4	IL6	9606.ENSP00000231449	9606.ENSP00000385675	0	0	0	0	0	0	0.9	0.916	0.991
IL4	TNF	9606.ENSP00000231449	9606.ENSP00000398698	0	0	0	0	0	0	0.9	0.933	0.993
IL6	STAT3	9606.ENSP00000385675	9606.ENSP00000264657	0	0	0	0	0	0.182	0.9	0.917	0.992
IL6	IL6R	9606.ENSP00000385675	9606.ENSP00000357470	0	0	0	0	0	0.978	0.9	0.989	0.999
IL6	IL6ST	9606.ENSP00000385675	9606.ENSP00000370698	0	0	0	0	0	0.974	0.9	0.988	0.999
IL6	TNF	9606.ENSP00000385675	9606.ENSP00000398698	0	0	0	0	0	0	0.9	0.941	0.993
IL6R	STAT3	9606.ENSP00000357470	9606.ENSP00000264657	0	0	0	0	0	0.27	0.9	0.832	0.986
IL6R	IL6ST	9606.ENSP00000357470	9606.ENSP00000370698	0	0	0	0.559	0	0.901	0.9	0.977	0.994
IL6ST	STAT3	9606.ENSP00000370698	9606.ENSP00000264657	0	0	0	0	0	0.317	0.9	0.819	0.986
STAT3	TNF	9606.ENSP00000264657	9606.ENSP00000398698	0	0	0	0	0	0	0.65	0.839	0.941
CD28	ITGB7	9606.ENSP00000324890	9606.ENSP00000267082	0	0	0	0	0	0	0.9	0.31	0.928
CD28	ITGB3	9606.ENSP00000324890	9606.ENSP00000452786	0	0	0	0	0	0	0.9	0.156	0.911
CD28	ITGB1	9606.ENSP00000324890	9606.ENSP00000379350	0	0	0	0	0	0	0.9	0.407	0.938
CD28	ITGB2	9606.ENSP00000324890	9606.ENSP00000380948	0	0	0	0	0	0	0.9	0.391	0.936
CD28	ITGA4	9606.ENSP00000324890	9606.ENSP00000380227	0	0	0	0	0	0	0.9	0.804	0.979
FN1	ITGB7	9606.ENSP00000346839	9606.ENSP00000267082	0	0	0	0	0	0.27	0.9	0.485	0.959
FN1	PXN	9606.ENSP00000346839	9606.ENSP00000267257	0	0	0	0	0	0.247	0.9	0.962	0.996
FN1	VCAM1	9606.ENSP00000346839	9606.ENSP00000294728	0	0	0	0	0	0	0	0.951	0.951
FN1	YWHAZ	9606.ENSP00000346839	9606.ENSP00000379287	0	0	0	0	0	0.063	0.9	0.346	0.933
FN1	ITGB3	9606.ENSP00000346839	9606.ENSP00000452786	0	0	0	0	0	0.974	0.9	0.972	0.999
FN1	ITGA4	9606.ENSP00000346839	9606.ENSP00000380227	0	0	0	0	0	0.487	0.9	0.988	0.999
FN1	ITGB1	9606.ENSP00000346839	9606.ENSP00000379350	0	0	0	0	0	0.876	0.9	0.989	0.999
ITGA4	MADCAM1	9606.ENSP00000380227	9606.ENSP00000215637	0	0	0	0	0	0.823	0.9	0.763	0.995
ITGA4	ITGB7	9606.ENSP00000380227	9606.ENSP00000267082	0	0	0	0	0	0.979	0.9	0.885	0.999
ITGA4	PXN	9606.ENSP00000380227	9606.ENSP00000267257	0	0	0	0	0	0.77	0.9	0.985	0.999
ITGA4	VCAM1	9606.ENSP00000380227	9606.ENSP00000294728	0	0	0	0	0	0.093	0.9	0.989	0.998
ITGA4	YWHAZ	9606.ENSP00000380227	9606.ENSP00000379287	0	0	0	0	0	0.807	0.9	0.432	0.988
ITGA4	ITGB1	9606.ENSP00000380227	9606.ENSP00000379350	0	0	0	0	0	0.844	0.9	0.99	0.999
ITGA4	ITGB2	9606.ENSP00000380227	9606.ENSP00000380948	0	0	0	0	0	0.336	0.9	0.735	0.98
ITGA4	ITGB3	9606.ENSP00000380227	9606.ENSP00000452786	0	0	0	0	0	0.496	0.9	0.683	0.982
ITGB1	ITGB7	9606.ENSP00000379350	9606.ENSP00000267082	0	0	0	0.927	0	0	0.9	0.52	0.903
ITGB1	PXN	9606.ENSP00000379350	9606.ENSP00000267257	0	0	0	0	0	0.87	0.9	0.926	0.998
ITGB1	VCAM1	9606.ENSP00000379350	9606.ENSP00000294728	0	0	0	0	0	0.189	0.9	0.966	0.997
ITGB1	YWHAZ	9606.ENSP00000379350	9606.ENSP00000379287	0	0	0	0	0	0.057	0.9	0.195	0.917
ITGB1	ITGB2	9606.ENSP00000379350	9606.ENSP00000380948	0	0	0	0.931	0	0	0.9	0.642	0.904
ITGB1	ITGB3	9606.ENSP00000379350	9606.ENSP00000452786	0	0	0	0.923	0	0.273	0.9	0.736	0.928
ITGB2	ITGB7	9606.ENSP00000380948	9606.ENSP00000267082	0	0	0	0.93	0	0	0.9	0.577	0.903
ITGB2	VCAM1	9606.ENSP00000380948	9606.ENSP00000294728	0	0	0	0	0	0	0.9	0.935	0.993
ITGB2	ITGB3	9606.ENSP00000380948	9606.ENSP00000452786	0	0	0	0.892	0	0	0.9	0.648	0.906
ITGB3	ITGB7	9606.ENSP00000452786	9606.ENSP00000267082	0	0	0	0.889	0	0	0.9	0.391	0.904
ITGB3	PXN	9606.ENSP00000452786	9606.ENSP00000267257	0	0	0	0	0	0.298	0.9	0.851	0.988
ITGB7	MADCAM1	9606.ENSP00000267082	9606.ENSP00000215637	0	0	0	0	0	0.27	0.9	0.797	0.983
ITGB7	PXN	9606.ENSP00000267082	9606.ENSP00000267257	0	0	0	0	0	0.078	0.9	0.435	0.943
ITGB7	VCAM1	9606.ENSP00000267082	9606.ENSP00000294728	0	0	0	0	0	0.213	0.9	0.335	0.943
PXN	VCAM1	9606.ENSP00000267257	9606.ENSP00000294728	0	0	0	0	0	0.044	0.9	0.428	0.94
PXN	YWHAZ	9606.ENSP00000267257	9606.ENSP00000379287	0	0	0	0	0	0.06	0.9	0.503	0.949
AKAP9	KCNQ1	9606.ENSP00000348573	9606.ENSP00000155840	0	0	0	0	0	0.675	0.8	0.989	0.999
AKAP9	KCNE1	9606.ENSP00000348573	9606.ENSP00000337255	0	0	0	0	0	0	0.6	0.927	0.969
KCNE1	KCNQ1	9606.ENSP00000337255	9606.ENSP00000155840	0	0	0	0	0	0.756	0.8	0.996	0.999
KCNE1	KCNH2	9606.ENSP00000337255	9606.ENSP00000262186	0	0	0	0	0	0.27	0.6	0.977	0.992
KCNE1	KCNE3	9606.ENSP00000337255	9606.ENSP00000310557	0	0	0	0	0	0	0	0.934	0.934
KCNE3	KCNQ1	9606.ENSP00000310557	9606.ENSP00000155840	0	0	0	0	0	0	0.8	0.99	0.997
KCNH2	KCNQ1	9606.ENSP00000262186	9606.ENSP00000155840	0	0	0	0	0	0	0.5	0.976	0.987
BBS1	BBS9	9606.ENSP00000317469	9606.ENSP00000242067	0	0	0	0	0	0.979	0.9	0.983	0.999
BBS1	BBS2	9606.ENSP00000317469	9606.ENSP00000245157	0	0	0	0	0	0.837	0.9	0.995	0.999
BBS1	BBS7	9606.ENSP00000317469	9606.ENSP00000264499	0	0	0	0	0	0.875	0.9	0.962	0.999
BBS1	BBS4	9606.ENSP00000317469	9606.ENSP00000268057	0	0	0	0	0	0.982	0.9	0.974	0.999
BBS1	BBS5	9606.ENSP00000317469	9606.ENSP00000295240	0	0	0	0	0	0.894	0.9	0.966	0.999
BBS1	LZTFL1	9606.ENSP00000317469	9606.ENSP00000296135	0	0	0	0	0	0.827	0.6	0.731	0.979
BBS1	TTC8	9606.ENSP00000317469	9606.ENSP00000482306	0	0	0	0	0	0.978	0.9	0.861	0.999
BBS2	BBS9	9606.ENSP00000245157	9606.ENSP00000242067	0	0	0	0	0	0.902	0.9	0.977	0.999
BBS2	LZTFL1	9606.ENSP00000245157	9606.ENSP00000296135	0	0	0	0	0	0.755	0.6	0.799	0.978
BBS2	TTC8	9606.ENSP00000245157	9606.ENSP00000482306	0	0	0	0	0	0.795	0.9	0.807	0.995
BBS2	BBS5	9606.ENSP00000245157	9606.ENSP00000295240	0	0	0	0	0	0.89	0.9	0.959	0.999
BBS2	BBS7	9606.ENSP00000245157	9606.ENSP00000264499	0	0	0	0	0	0.9	0.9	0.988	0.999
BBS2	BBS4	9606.ENSP00000245157	9606.ENSP00000268057	0	0	0	0	0	0.92	0.9	0.992	0.999
BBS4	BBS9	9606.ENSP00000268057	9606.ENSP00000242067	0	0	0	0	0	0.969	0.9	0.937	0.999
BBS4	BBS7	9606.ENSP00000268057	9606.ENSP00000264499	0	0	0	0	0	0.902	0.9	0.958	0.999
BBS4	LZTFL1	9606.ENSP00000268057	9606.ENSP00000296135	0	0	0	0	0	0.865	0.6	0.637	0.978
BBS4	TTC8	9606.ENSP00000268057	9606.ENSP00000482306	0	0	0	0.562	0	0.957	0.9	0.865	0.997
BBS4	BBS5	9606.ENSP00000268057	9606.ENSP00000295240	0	0	0	0	0	0.914	0.9	0.994	0.999
BBS5	BBS9	9606.ENSP00000295240	9606.ENSP00000242067	0	0	0	0	0	0.887	0.9	0.985	0.999
BBS5	BBS7	9606.ENSP00000295240	9606.ENSP00000264499	0	0	0	0	0	0.791	0.9	0.994	0.999
BBS5	LZTFL1	9606.ENSP00000295240	9606.ENSP00000296135	0	0	0	0	0	0.879	0.6	0.814	0.99
BBS5	TTC8	9606.ENSP00000295240	9606.ENSP00000482306	0	0	0	0	0	0.893	0.9	0.874	0.998
BBS7	BBS9	9606.ENSP00000264499	9606.ENSP00000242067	0	0	0	0	0	0.819	0.9	0.994	0.999
BBS7	LZTFL1	9606.ENSP00000264499	9606.ENSP00000296135	0	0	0	0	0	0.835	0.6	0.809	0.986
BBS7	TTC8	9606.ENSP00000264499	9606.ENSP00000482306	0	0	0	0	0	0.812	0.9	0.85	0.996
BBS9	LZTFL1	9606.ENSP00000242067	9606.ENSP00000296135	0	0	0	0	0	0.877	0.6	0.858	0.992
BBS9	TTC8	9606.ENSP00000242067	9606.ENSP00000482306	0	0	0	0	0	0.94	0.9	0.891	0.999
LZTFL1	MCHR1	9606.ENSP00000296135	9606.ENSP00000249016	0	0	0	0	0	0	0.9	0.213	0.917
LZTFL1	SMO	9606.ENSP00000296135	9606.ENSP00000249373	0	0	0	0	0	0	0.9	0.37	0.934
LZTFL1	SSTR3	9606.ENSP00000296135	9606.ENSP00000480971	0	0	0	0	0	0	0.9	0.468	0.944
LZTFL1	TTC8	9606.ENSP00000296135	9606.ENSP00000482306	0	0	0	0	0	0.818	0.6	0.693	0.975
MCHR1	SMO	9606.ENSP00000249016	9606.ENSP00000249373	0	0	0	0	0	0	0.9	0.303	0.927
SMO	SSTR3	9606.ENSP00000249373	9606.ENSP00000480971	0	0	0	0	0	0	0.9	0.52	0.95
APOE	SNCA	9606.ENSP00000252486	9606.ENSP00000338345	0	0	0	0	0	0.878	0	0.761	0.969
APOE	MAPT	9606.ENSP00000252486	9606.ENSP00000340820	0	0	0	0	0	0.823	0	0.983	0.996
CASP3	MAPT	9606.ENSP00000311032	9606.ENSP00000340820	0	0	0	0	0	0.731	0.9	0.601	0.988
CDK5	GSK3B	9606.ENSP00000419782	9606.ENSP00000324806	0	0	0.317	0.824	0	0.47	0.9	0.791	0.954
CDK5	MAPT	9606.ENSP00000419782	9606.ENSP00000340820	0	0	0	0	0	0.905	0.9	0.765	0.997
FYN	GSK3B	9606.ENSP00000346671	9606.ENSP00000324806	0	0	0	0.562	0	0.077	0.9	0.484	0.923
FYN	SNCA	9606.ENSP00000346671	9606.ENSP00000338345	0	0	0	0	0	0.768	0.9	0.326	0.983
FYN	MAPT	9606.ENSP00000346671	9606.ENSP00000340820	0	0	0	0	0	0.883	0	0.98	0.997
GSK3B	YWHAZ	9606.ENSP00000324806	9606.ENSP00000379287	0	0	0	0	0	0.98	0	0.597	0.991
GSK3B	MAPT	9606.ENSP00000324806	9606.ENSP00000340820	0	0	0	0	0	0.994	0.9	0.75	0.999
MAPT	S100B	9606.ENSP00000340820	9606.ENSP00000291700	0	0	0	0	0	0.968	0	0.66	0.988
MAPT	TUBB3	9606.ENSP00000340820	9606.ENSP00000320295	0	0	0	0	0	0.891	0.8	0.447	0.986
MAPT	SNCA	9606.ENSP00000340820	9606.ENSP00000338345	0	0	0	0	0	0.756	0	0.949	0.987
MAPT	MARK2	9606.ENSP00000340820	9606.ENSP00000385751	0	0	0	0	0	0.829	0.9	0.491	0.99
MAPT	YWHAZ	9606.ENSP00000340820	9606.ENSP00000379287	0	0	0	0	0	0.908	0	0.928	0.993
MRPL42	MRPS7	9606.ENSP00000449884	9606.ENSP00000245539	0	0	0	0	0	0.823	0.9	0.118	0.983
MRPL42	MRPS18B	9606.ENSP00000449884	9606.ENSP00000259873	0	0	0	0	0	0.981	0.9	0.426	0.998
MRPL42	MRPS5	9606.ENSP00000449884	9606.ENSP00000272418	0	0	0	0	0	0.835	0.9	0.551	0.991
MRPL42	MRPS31	9606.ENSP00000449884	9606.ENSP00000315397	0	0	0	0	0	0.981	0.54	0	0.991
MRPL42	MRPS11	9606.ENSP00000449884	9606.ENSP00000317376	0	0	0	0	0	0.981	0.9	0.124	0.998
MRPL42	MRPS15	9606.ENSP00000449884	9606.ENSP00000362208	0	0	0	0	0	0.916	0.9	0.112	0.991
MRPL42	MRPS33	9606.ENSP00000449884	9606.ENSP00000376732	0	0	0	0	0	0.981	0.9	0	0.998
MRPL42	MRPS6	9606.ENSP00000449884	9606.ENSP00000382250	0	0	0	0	0	0.981	0.9	0.093	0.998
MRPL42	MRPS27	9606.ENSP00000449884	9606.ENSP00000426941	0	0	0	0	0	0.825	0.9	0.322	0.987
MRPL42	MRPS21	9606.ENSP00000449884	9606.ENSP00000461930	0	0	0	0	0	0.981	0.9	0.107	0.998
MRPS11	MRPS7	9606.ENSP00000317376	9606.ENSP00000245539	0	0	0	0	0	0.943	0.9	0.427	0.996
MRPS11	MRPS18B	9606.ENSP00000317376	9606.ENSP00000259873	0	0	0	0	0	0.913	0.9	0.332	0.993
MRPS11	MRPS5	9606.ENSP00000317376	9606.ENSP00000272418	0	0	0	0	0	0.982	0.9	0.337	0.998
MRPS11	MRPS31	9606.ENSP00000317376	9606.ENSP00000315397	0	0	0	0	0	0.957	0.8	0.076	0.991
MRPS11	MRPS27	9606.ENSP00000317376	9606.ENSP00000426941	0	0	0	0	0	0.913	0.9	0	0.99
MRPS11	MRPS33	9606.ENSP00000317376	9606.ENSP00000376732	0	0	0	0	0	0.914	0.9	0.08	0.991
MRPS11	MRPS21	9606.ENSP00000317376	9606.ENSP00000461930	0	0	0	0	0	0.914	0.9	0.452	0.994
MRPS11	MRPS6	9606.ENSP00000317376	9606.ENSP00000382250	0	0	0	0	0	0.921	0.9	0.456	0.995
MRPS11	MRPS15	9606.ENSP00000317376	9606.ENSP00000362208	0	0	0	0	0	0.946	0.9	0.561	0.997
MRPS15	MRPS7	9606.ENSP00000362208	9606.ENSP00000245539	0	0	0	0	0	0.972	0.9	0.568	0.998
MRPS15	MRPS18B	9606.ENSP00000362208	9606.ENSP00000259873	0	0	0	0	0	0.839	0.9	0.401	0.989
MRPS15	MRPS5	9606.ENSP00000362208	9606.ENSP00000272418	0	0	0	0	0	0.995	0.9	0.459	0.999
MRPS15	MRPS31	9606.ENSP00000362208	9606.ENSP00000315397	0	0	0	0	0	0.975	0.8	0.063	0.995
MRPS15	MRPS33	9606.ENSP00000362208	9606.ENSP00000376732	0	0	0	0	0	0.912	0.9	0.108	0.991
MRPS15	MRPS21	9606.ENSP00000362208	9606.ENSP00000461930	0	0	0	0	0	0.942	0.9	0.483	0.996
MRPS15	MRPS27	9606.ENSP00000362208	9606.ENSP00000426941	0	0	0	0	0	0.961	0.9	0.462	0.997
MRPS15	MRPS6	9606.ENSP00000362208	9606.ENSP00000382250	0	0	0	0	0	0.994	0.9	0.48	0.999
MRPS18B	MRPS7	9606.ENSP00000259873	9606.ENSP00000245539	0	0	0	0	0	0.842	0.9	0.63	0.993
MRPS18B	MRPS5	9606.ENSP00000259873	9606.ENSP00000272418	0	0	0	0	0	0.842	0.9	0.367	0.989
MRPS18B	MRPS21	9606.ENSP00000259873	9606.ENSP00000461930	0	0	0	0	0	0.842	0.9	0.336	0.988
MRPS18B	MRPS6	9606.ENSP00000259873	9606.ENSP00000382250	0	0	0	0	0	0.88	0.9	0.269	0.99
MRPS18B	MRPS31	9606.ENSP00000259873	9606.ENSP00000315397	0	0	0	0	0	0.971	0.6	0.716	0.996
MRPS18B	MRPS33	9606.ENSP00000259873	9606.ENSP00000376732	0	0	0	0	0	0.842	0.9	0.794	0.996
MRPS18B	MRPS27	9606.ENSP00000259873	9606.ENSP00000426941	0	0	0	0	0	0.958	0.9	0.668	0.998
MRPS21	MRPS7	9606.ENSP00000461930	9606.ENSP00000245539	0	0	0	0	0	0.842	0.9	0.276	0.987
MRPS21	MRPS5	9606.ENSP00000461930	9606.ENSP00000272418	0	0	0	0	0	0.868	0.9	0.645	0.994
MRPS21	MRPS31	9606.ENSP00000461930	9606.ENSP00000315397	0	0	0	0	0	0.969	0.8	0.25	0.995
MRPS21	MRPS33	9606.ENSP00000461930	9606.ENSP00000376732	0	0	0	0	0	0.842	0.9	0.761	0.995
MRPS21	MRPS6	9606.ENSP00000461930	9606.ENSP00000382250	0	0	0	0	0	0.842	0.9	0.378	0.989
MRPS21	MRPS27	9606.ENSP00000461930	9606.ENSP00000426941	0	0	0	0	0	0.935	0.9	0.671	0.997
MRPS27	MRPS7	9606.ENSP00000426941	9606.ENSP00000245539	0	0	0	0	0	0.899	0.9	0.404	0.993
MRPS27	MRPS5	9606.ENSP00000426941	9606.ENSP00000272418	0	0	0	0	0	0.956	0.9	0.675	0.998
MRPS27	MRPS31	9606.ENSP00000426941	9606.ENSP00000315397	0	0	0	0	0	0.977	0.8	0.242	0.996
MRPS27	MRPS33	9606.ENSP00000426941	9606.ENSP00000376732	0	0	0	0	0	0.913	0.9	0.095	0.991
MRPS27	MRPS6	9606.ENSP00000426941	9606.ENSP00000382250	0	0	0	0	0	0.842	0.9	0.081	0.984
MRPS31	MRPS7	9606.ENSP00000315397	9606.ENSP00000245539	0	0	0	0	0	0.978	0.8	0.064	0.995
MRPS31	MRPS5	9606.ENSP00000315397	9606.ENSP00000272418	0	0	0	0	0	0.967	0.8	0	0.993
MRPS31	MRPS6	9606.ENSP00000315397	9606.ENSP00000382250	0	0	0	0	0	0.912	0.8	0	0.981
MRPS31	MRPS33	9606.ENSP00000315397	9606.ENSP00000376732	0	0	0	0	0	0.967	0.8	0.773	0.998
MRPS33	MRPS7	9606.ENSP00000376732	9606.ENSP00000245539	0	0	0	0	0	0.842	0.9	0.36	0.989
MRPS33	MRPS5	9606.ENSP00000376732	9606.ENSP00000272418	0	0	0	0	0	0.958	0.9	0.086	0.995
MRPS33	MRPS6	9606.ENSP00000376732	9606.ENSP00000382250	0	0	0	0	0	0.842	0.9	0.39	0.989
MRPS5	MRPS7	9606.ENSP00000272418	9606.ENSP00000245539	0	0	0	0	0	0.984	0.9	0.595	0.999
MRPS5	MRPS6	9606.ENSP00000272418	9606.ENSP00000382250	0	0	0	0	0	0.986	0.9	0.361	0.999
MRPS6	MRPS7	9606.ENSP00000382250	9606.ENSP00000245539	0	0	0	0	0	0.954	0.9	0.31	0.996
IFIT2	IRF1	9606.ENSP00000360891	9606.ENSP00000245414	0	0	0	0	0	0	0.9	0.621	0.96
IFIT2	OASL	9606.ENSP00000360891	9606.ENSP00000257570	0	0	0	0	0	0.16	0.9	0.703	0.972
IFIT2	STAT2	9606.ENSP00000360891	9606.ENSP00000315768	0	0	0	0	0	0	0.9	0.681	0.966
IFIT2	OAS2	9606.ENSP00000360891	9606.ENSP00000342278	0	0	0	0	0	0.327	0.9	0.721	0.979
IFIT2	IFIT3	9606.ENSP00000360891	9606.ENSP00000360883	0	0	0	0.945	0	0.875	0.9	0.954	0.987
IFIT2	IRF9	9606.ENSP00000360891	9606.ENSP00000380073	0	0	0	0	0	0	0.9	0.663	0.964
IFIT2	IRF7	9606.ENSP00000360891	9606.ENSP00000380697	0	0	0	0	0	0	0.9	0.693	0.968
IFIT2	OAS1	9606.ENSP00000360891	9606.ENSP00000388001	0	0	0	0	0	0	0.9	0.7	0.968
IFIT2	MX1	9606.ENSP00000360891	9606.ENSP00000381601	0	0	0	0	0	0	0.9	0.772	0.976
IFIT2	RSAD2	9606.ENSP00000360891	9606.ENSP00000371471	0	0	0	0	0	0.154	0.9	0.726	0.974
IFIT3	IRF1	9606.ENSP00000360883	9606.ENSP00000245414	0	0	0	0	0	0	0.9	0.608	0.959
IFIT3	OASL	9606.ENSP00000360883	9606.ENSP00000257570	0	0	0	0	0	0.16	0.9	0.712	0.973
IFIT3	STAT2	9606.ENSP00000360883	9606.ENSP00000315768	0	0	0	0	0	0	0.9	0.635	0.961
IFIT3	OAS2	9606.ENSP00000360883	9606.ENSP00000342278	0	0	0	0	0	0.329	0.9	0.702	0.978
IFIT3	IRF9	9606.ENSP00000360883	9606.ENSP00000380073	0	0	0	0	0	0	0.9	0.66	0.964
IFIT3	OAS1	9606.ENSP00000360883	9606.ENSP00000388001	0	0	0	0	0	0	0.9	0.71	0.969
IFIT3	IRF7	9606.ENSP00000360883	9606.ENSP00000380697	0	0	0	0	0	0	0.9	0.683	0.966
IFIT3	MX1	9606.ENSP00000360883	9606.ENSP00000381601	0	0	0	0	0	0	0.9	0.763	0.975
IFIT3	RSAD2	9606.ENSP00000360883	9606.ENSP00000371471	0	0	0	0	0	0.398	0.9	0.716	0.981
IRF1	IRF7	9606.ENSP00000245414	9606.ENSP00000380697	0	0	0	0.599	0	0	0.9	0.882	0.935
IRF1	OAS1	9606.ENSP00000245414	9606.ENSP00000388001	0	0	0	0	0	0	0.9	0.593	0.957
IRF1	OAS2	9606.ENSP00000245414	9606.ENSP00000342278	0	0	0	0	0	0	0.9	0.583	0.956
IRF1	OASL	9606.ENSP00000245414	9606.ENSP00000257570	0	0	0	0	0	0	0.9	0.606	0.958
IRF1	RSAD2	9606.ENSP00000245414	9606.ENSP00000371471	0	0	0	0	0	0	0.9	0.7	0.968
IRF1	IRF9	9606.ENSP00000245414	9606.ENSP00000380073	0	0	0	0.675	0	0.287	0.9	0.802	0.944
IRF1	MX1	9606.ENSP00000245414	9606.ENSP00000381601	0	0	0	0	0	0	0.9	0.745	0.973
IRF1	STAT2	9606.ENSP00000245414	9606.ENSP00000315768	0	0	0	0	0	0	0.9	0.786	0.977
IRF7	OASL	9606.ENSP00000380697	9606.ENSP00000257570	0	0	0	0	0	0	0.9	0.714	0.97
IRF7	STAT2	9606.ENSP00000380697	9606.ENSP00000315768	0	0	0	0	0	0	0.9	0.811	0.98
IRF7	OAS2	9606.ENSP00000380697	9606.ENSP00000342278	0	0	0	0	0	0	0.9	0.699	0.968
IRF7	RSAD2	9606.ENSP00000380697	9606.ENSP00000371471	0	0	0	0	0	0.182	0.9	0.836	0.985
IRF7	IRF9	9606.ENSP00000380697	9606.ENSP00000380073	0	0	0	0.633	0	0	0.9	0.847	0.93
IRF7	OAS1	9606.ENSP00000380697	9606.ENSP00000388001	0	0	0	0	0	0	0.9	0.71	0.969
IRF7	MX1	9606.ENSP00000380697	9606.ENSP00000381601	0	0	0	0	0	0	0.9	0.824	0.981
IRF9	OASL	9606.ENSP00000380073	9606.ENSP00000257570	0	0	0	0	0	0	0.9	0.544	0.952
IRF9	STAT2	9606.ENSP00000380073	9606.ENSP00000315768	0	0	0	0	0	0.917	0.8	0.991	0.999
IRF9	OAS2	9606.ENSP00000380073	9606.ENSP00000342278	0	0	0	0	0	0	0.9	0.632	0.961
IRF9	RSAD2	9606.ENSP00000380073	9606.ENSP00000371471	0	0	0	0	0	0	0.9	0.629	0.961
IRF9	OAS1	9606.ENSP00000380073	9606.ENSP00000388001	0	0	0	0	0	0	0.9	0.684	0.967
IRF9	MX1	9606.ENSP00000380073	9606.ENSP00000381601	0	0	0	0	0	0	0.9	0.744	0.973
MX1	OASL	9606.ENSP00000381601	9606.ENSP00000257570	0	0	0	0	0	0.149	0.9	0.794	0.981
MX1	STAT2	9606.ENSP00000381601	9606.ENSP00000315768	0	0	0	0	0	0	0.9	0.743	0.973
MX1	OAS2	9606.ENSP00000381601	9606.ENSP00000342278	0	0	0	0	0	0	0.9	0.796	0.978
MX1	RSAD2	9606.ENSP00000381601	9606.ENSP00000371471	0	0	0	0	0	0	0.9	0.831	0.982
MX1	OAS1	9606.ENSP00000381601	9606.ENSP00000388001	0	0	0	0	0	0	0.9	0.857	0.985
OAS1	STAT2	9606.ENSP00000388001	9606.ENSP00000315768	0	0	0	0	0	0	0.9	0.67	0.965
OAS1	RSAD2	9606.ENSP00000388001	9606.ENSP00000371471	0	0	0	0	0	0	0.9	0.71	0.969
OAS2	STAT2	9606.ENSP00000342278	9606.ENSP00000315768	0	0	0	0	0	0	0.9	0.615	0.959
OAS2	RSAD2	9606.ENSP00000342278	9606.ENSP00000371471	0	0	0	0	0	0.335	0.9	0.7	0.978
OASL	STAT2	9606.ENSP00000257570	9606.ENSP00000315768	0	0	0	0	0	0.07	0.9	0.517	0.951
OASL	RSAD2	9606.ENSP00000257570	9606.ENSP00000371471	0	0	0	0	0	0	0.9	0.715	0.97
RSAD2	STAT2	9606.ENSP00000371471	9606.ENSP00000315768	0	0	0	0	0	0	0.9	0.631	0.961
FBXW7	NOTCH4	9606.ENSP00000281708	9606.ENSP00000364163	0	0	0	0	0	0.266	0.9	0.458	0.956
HES1	MAML3	9606.ENSP00000232424	9606.ENSP00000421180	0	0	0	0	0	0	0.9	0.122	0.908
HES1	MAML1	9606.ENSP00000232424	9606.ENSP00000292599	0	0	0	0	0	0	0.9	0.359	0.933
HES1	NOTCH4	9606.ENSP00000232424	9606.ENSP00000364163	0	0	0	0	0	0.104	0.9	0.504	0.951
HES1	HEY1	9606.ENSP00000232424	9606.ENSP00000338272	0	0	0	0.681	0	0.675	0.9	0.821	0.974
HES1	RBPJ	9606.ENSP00000232424	9606.ENSP00000345206	0	0	0	0	0	0.289	0.9	0.742	0.98
HES5	MAML1	9606.ENSP00000367714	9606.ENSP00000292599	0	0	0	0	0	0	0.9	0.557	0.953
HES5	RBPJ	9606.ENSP00000367714	9606.ENSP00000345206	0	0	0	0	0	0	0.9	0.795	0.978
HES5	NOTCH4	9606.ENSP00000367714	9606.ENSP00000364163	0	0	0	0	0	0	0.9	0.627	0.961
HES5	MAML3	9606.ENSP00000367714	9606.ENSP00000421180	0	0	0	0	0	0	0.9	0.26	0.922
HEY1	MAML1	9606.ENSP00000338272	9606.ENSP00000292599	0	0	0	0	0	0	0.9	0.595	0.957
HEY1	MAML3	9606.ENSP00000338272	9606.ENSP00000421180	0	0	0	0	0	0	0.9	0.211	0.917
HEY1	HEY2	9606.ENSP00000338272	9606.ENSP00000357348	0	0	0	0.935	0	0.75	0.9	0.949	0.975
HEY1	NOTCH4	9606.ENSP00000338272	9606.ENSP00000364163	0	0	0	0	0	0.104	0.9	0.797	0.98
HEY1	RBPJ	9606.ENSP00000338272	9606.ENSP00000345206	0	0	0	0	0	0.067	0.9	0.841	0.983
HEY2	MAML1	9606.ENSP00000357348	9606.ENSP00000292599	0	0	0	0	0	0	0.9	0.465	0.944
HEY2	RBPJ	9606.ENSP00000357348	9606.ENSP00000345206	0	0	0	0	0	0.067	0.9	0.822	0.981
HEY2	MAML3	9606.ENSP00000357348	9606.ENSP00000421180	0	0	0	0	0	0	0.9	0.108	0.906
HEY2	NOTCH4	9606.ENSP00000357348	9606.ENSP00000364163	0	0	0	0	0	0.104	0.9	0.725	0.973
MAML1	NOTCH4	9606.ENSP00000292599	9606.ENSP00000364163	0	0	0	0	0	0.47	0.8	0.607	0.954
MAML1	RBPJ	9606.ENSP00000292599	9606.ENSP00000345206	0	0	0	0	0	0.978	0.9	0.988	0.999
MAML3	RBPJ	9606.ENSP00000421180	9606.ENSP00000345206	0	0	0	0	0	0.27	0.8	0.697	0.951
MAML3	NOTCH4	9606.ENSP00000421180	9606.ENSP00000364163	0	0	0	0	0	0.225	0.8	0.72	0.952
NCSTN	NOTCH4	9606.ENSP00000294785	9606.ENSP00000364163	0	0	0	0	0	0.142	0.9	0.478	0.951
NCSTN	PSEN1	9606.ENSP00000294785	9606.ENSP00000326366	0	0	0	0	0	0.989	0.9	0.994	0.999
NOTCH4	PSEN1	9606.ENSP00000364163	9606.ENSP00000326366	0	0	0	0	0	0.308	0.9	0.338	0.95
NOTCH4	RBPJ	9606.ENSP00000364163	9606.ENSP00000345206	0	0	0	0	0	0.354	0.8	0.886	0.984
ABCA1	APOE	9606.ENSP00000363868	9606.ENSP00000252486	0	0	0	0	0	0	0	0.983	0.983
ABCA1	NR1H2	9606.ENSP00000363868	9606.ENSP00000253727	0	0	0	0	0	0.681	0.8	0.838	0.988
ABCA1	RXRB	9606.ENSP00000363868	9606.ENSP00000363817	0	0	0	0	0	0.06	0.9	0.268	0.925
ABCG1	APOE	9606.ENSP00000354995	9606.ENSP00000252486	0	0	0	0	0	0	0	0.921	0.921
ABCG1	NR1H2	9606.ENSP00000354995	9606.ENSP00000253727	0	0	0	0	0	0.075	0.9	0.742	0.974
ABCG1	RXRB	9606.ENSP00000354995	9606.ENSP00000363817	0	0	0	0	0	0.075	0.9	0.29	0.928
ABCG1	RXRA	9606.ENSP00000354995	9606.ENSP00000419692	0	0	0	0	0	0.075	0.9	0.488	0.948
ABCG5	NR1H2	9606.ENSP00000260645	9606.ENSP00000253727	0	0	0	0	0	0.075	0.9	0.78	0.977
ABCG5	RXRB	9606.ENSP00000260645	9606.ENSP00000363817	0	0	0	0	0	0.075	0.9	0.107	0.91
ABCG5	RXRA	9606.ENSP00000260645	9606.ENSP00000419692	0	0	0	0	0	0.075	0.9	0.204	0.919
ABCG5	ABCG8	9606.ENSP00000260645	9606.ENSP00000272286	0	0	0	0.746	0	0.961	0.9	0.994	0.996
ABCG8	NR1H2	9606.ENSP00000272286	9606.ENSP00000253727	0	0	0	0	0	0.075	0.9	0.761	0.975
ABCG8	RXRB	9606.ENSP00000272286	9606.ENSP00000363817	0	0	0	0	0	0.075	0.9	0.08	0.907
ABCG8	RXRA	9606.ENSP00000272286	9606.ENSP00000419692	0	0	0	0	0	0.075	0.9	0.14	0.913
APOE	RXRB	9606.ENSP00000252486	9606.ENSP00000363817	0	0	0	0	0	0	0.9	0.153	0.911
APOE	RXRA	9606.ENSP00000252486	9606.ENSP00000419692	0	0	0	0	0	0	0.9	0.255	0.922
APOE	NR1H2	9606.ENSP00000252486	9606.ENSP00000253727	0	0	0	0	0	0	0.9	0.562	0.954
FASN	NR1H2	9606.ENSP00000304592	9606.ENSP00000253727	0	0	0	0	0	0.27	0.9	0.45	0.956
FASN	RXRB	9606.ENSP00000304592	9606.ENSP00000363817	0	0	0	0	0	0	0.9	0.124	0.908
FASN	RXRA	9606.ENSP00000304592	9606.ENSP00000419692	0	0	0	0	0	0	0.9	0.331	0.93
FASN	SREBF1	9606.ENSP00000304592	9606.ENSP00000348069	0	0	0	0	0	0	0.9	0.923	0.991
NR1H2	SREBF1	9606.ENSP00000253727	9606.ENSP00000348069	0	0	0	0	0	0.27	0.9	0.725	0.978
NR1H2	RXRA	9606.ENSP00000253727	9606.ENSP00000419692	0	0	0	0.694	0	0.912	0.9	0.897	0.993
NR1H2	RXRG	9606.ENSP00000253727	9606.ENSP00000352900	0	0	0	0.681	0	0.946	0.9	0.632	0.995
NR1H2	RXRB	9606.ENSP00000253727	9606.ENSP00000363817	0	0	0	0.697	0	0.964	0.9	0.722	0.997
RXRA	SREBF1	9606.ENSP00000419692	9606.ENSP00000348069	0	0	0	0	0	0	0.9	0.569	0.955
RXRA	RXRG	9606.ENSP00000419692	9606.ENSP00000352900	0	0	0	0.971	0	0.273	0.9	0.834	0.926
RXRA	RXRB	9606.ENSP00000419692	9606.ENSP00000363817	0	0	0	0.968	0	0	0.9	0.838	0.902
RXRB	SREBF1	9606.ENSP00000363817	9606.ENSP00000348069	0	0	0	0	0	0	0.9	0.237	0.92
RXRB	RXRG	9606.ENSP00000363817	9606.ENSP00000352900	0	0	0	0.963	0	0	0.9	0.863	0.903
IFI27	MX2	9606.ENSP00000483430	9606.ENSP00000333657	0	0	0	0	0	0	0.9	0.519	0.949
IFI27	IFI6	9606.ENSP00000483430	9606.ENSP00000342513	0	0	0	0.835	0	0	0.9	0.902	0.914
IFI27	RNASEL	9606.ENSP00000483430	9606.ENSP00000356530	0	0	0	0	0	0	0.9	0.234	0.92
IFI27	IFIT1	9606.ENSP00000483430	9606.ENSP00000360869	0	0	0	0	0	0	0.9	0.715	0.97
IFI27	IFIT3	9606.ENSP00000483430	9606.ENSP00000360883	0	0	0	0	0	0	0.9	0.608	0.959
IFI27	ISG15	9606.ENSP00000483430	9606.ENSP00000368699	0	0	0	0	0	0	0.9	0.71	0.969
IFI27	RSAD2	9606.ENSP00000483430	9606.ENSP00000371471	0	0	0	0	0	0	0.9	0.706	0.969
IFI27	IRF7	9606.ENSP00000483430	9606.ENSP00000380697	0	0	0	0	0	0	0.9	0.601	0.958
IFI27	MX1	9606.ENSP00000483430	9606.ENSP00000381601	0	0	0	0	0	0	0.9	0.687	0.967
IFI27	OAS1	9606.ENSP00000483430	9606.ENSP00000388001	0	0	0	0	0	0	0.9	0.703	0.969
IFI6	MX2	9606.ENSP00000342513	9606.ENSP00000333657	0	0	0	0	0	0	0.9	0.507	0.948
IFI6	RNASEL	9606.ENSP00000342513	9606.ENSP00000356530	0	0	0	0	0	0	0.9	0.293	0.926
IFI6	IRF7	9606.ENSP00000342513	9606.ENSP00000380697	0	0	0	0	0	0	0.9	0.603	0.958
IFI6	RSAD2	9606.ENSP00000342513	9606.ENSP00000371471	0	0	0	0	0	0	0.9	0.653	0.963
IFI6	IFIT3	9606.ENSP00000342513	9606.ENSP00000360883	0	0	0	0	0	0	0.9	0.681	0.966
IFI6	OAS1	9606.ENSP00000342513	9606.ENSP00000388001	0	0	0	0	0	0	0.9	0.703	0.969
IFI6	IFIT1	9606.ENSP00000342513	9606.ENSP00000360869	0	0	0	0	0	0	0.9	0.707	0.969
IFI6	MX1	9606.ENSP00000342513	9606.ENSP00000381601	0	0	0	0	0	0	0.9	0.69	0.967
IFI6	ISG15	9606.ENSP00000342513	9606.ENSP00000368699	0	0	0	0	0	0	0.9	0.715	0.97
IFIT1	RNASEL	9606.ENSP00000360869	9606.ENSP00000356530	0	0	0	0	0	0.078	0.9	0.601	0.96
IFIT1	IRF7	9606.ENSP00000360869	9606.ENSP00000380697	0	0	0	0	0	0	0.9	0.795	0.978
IFIT1	ISG15	9606.ENSP00000360869	9606.ENSP00000368699	0	0	0	0	0	0.16	0.6	0.884	0.957
IFIT1	MX1	9606.ENSP00000360869	9606.ENSP00000381601	0	0	0	0	0	0	0.5	0.883	0.939
IFIT1	OAS1	9606.ENSP00000360869	9606.ENSP00000388001	0	0	0	0	0	0	0.9	0.802	0.979
IFIT1	RSAD2	9606.ENSP00000360869	9606.ENSP00000371471	0	0	0	0	0	0.154	0.9	0.833	0.984
IFIT1	IFIT3	9606.ENSP00000360869	9606.ENSP00000360883	0	0	0	0.898	0	0.974	0.9	0.965	0.997
IFIT3	MX2	9606.ENSP00000360883	9606.ENSP00000333657	0	0	0	0	0	0	0.9	0.695	0.968
IFIT3	RNASEL	9606.ENSP00000360883	9606.ENSP00000356530	0	0	0	0	0	0.078	0.9	0.402	0.94
IFIT3	OAS1	9606.ENSP00000360883	9606.ENSP00000388001	0	0	0	0	0	0	0.9	0.71	0.969
IFIT3	IRF7	9606.ENSP00000360883	9606.ENSP00000380697	0	0	0	0	0	0	0.9	0.683	0.966
IFIT3	MX1	9606.ENSP00000360883	9606.ENSP00000381601	0	0	0	0	0	0	0.9	0.763	0.975
IFIT3	ISG15	9606.ENSP00000360883	9606.ENSP00000368699	0	0	0	0	0	0.16	0.9	0.792	0.981
IFIT3	RSAD2	9606.ENSP00000360883	9606.ENSP00000371471	0	0	0	0	0	0.398	0.9	0.716	0.981
IRF7	MX2	9606.ENSP00000380697	9606.ENSP00000333657	0	0	0	0	0	0	0.9	0.748	0.973
IRF7	RNASEL	9606.ENSP00000380697	9606.ENSP00000356530	0	0	0	0	0	0.056	0.9	0.627	0.961
IRF7	ISG15	9606.ENSP00000380697	9606.ENSP00000368699	0	0	0	0	0	0	0.9	0.844	0.983
IRF7	RSAD2	9606.ENSP00000380697	9606.ENSP00000371471	0	0	0	0	0	0.182	0.9	0.836	0.985
IRF7	OAS1	9606.ENSP00000380697	9606.ENSP00000388001	0	0	0	0	0	0	0.9	0.71	0.969
IRF7	MX1	9606.ENSP00000380697	9606.ENSP00000381601	0	0	0	0	0	0	0.9	0.824	0.981
ISG15	MX2	9606.ENSP00000368699	9606.ENSP00000333657	0	0	0	0	0	0.149	0.6	0.806	0.928
ISG15	RNASEL	9606.ENSP00000368699	9606.ENSP00000356530	0	0	0	0	0	0.21	0.9	0.666	0.971
ISG15	MX1	9606.ENSP00000368699	9606.ENSP00000381601	0	0	0	0	0	0.149	0.6	0.88	0.955
ISG15	OAS1	9606.ENSP00000368699	9606.ENSP00000388001	0	0	0	0	0	0	0.9	0.804	0.979
ISG15	RSAD2	9606.ENSP00000368699	9606.ENSP00000371471	0	0	0	0	0	0	0.9	0.883	0.987
MX1	RNASEL	9606.ENSP00000381601	9606.ENSP00000356530	0	0	0	0	0	0.102	0.9	0.698	0.97
MX1	RSAD2	9606.ENSP00000381601	9606.ENSP00000371471	0	0	0	0	0	0	0.9	0.831	0.982
MX1	OAS1	9606.ENSP00000381601	9606.ENSP00000388001	0	0	0	0	0	0	0.9	0.857	0.985
MX2	RNASEL	9606.ENSP00000333657	9606.ENSP00000356530	0	0	0	0	0	0.102	0.9	0.488	0.95
MX2	OAS1	9606.ENSP00000333657	9606.ENSP00000388001	0	0	0	0	0	0	0.9	0.71	0.969
MX2	RSAD2	9606.ENSP00000333657	9606.ENSP00000371471	0	0	0	0	0	0	0.9	0.77	0.976
OAS1	RNASEL	9606.ENSP00000388001	9606.ENSP00000356530	0	0	0	0	0	0	0.9	0.852	0.984
OAS1	RSAD2	9606.ENSP00000388001	9606.ENSP00000371471	0	0	0	0	0	0	0.9	0.71	0.969
RNASEL	RSAD2	9606.ENSP00000356530	9606.ENSP00000371471	0	0	0	0	0	0.056	0.9	0.673	0.966
CEPT1	EPT1	9606.ENSP00000441980	9606.ENSP00000260585	0	0	0	0.685	0	0	0.9	0.69	0.921
CEPT1	PLD2	9606.ENSP00000441980	9606.ENSP00000263088	0	0	0	0	0	0	0.9	0.29	0.926
CEPT1	LPCAT4	9606.ENSP00000441980	9606.ENSP00000317300	0	0	0	0	0	0	0.9	0.373	0.934
CEPT1	PLD1	9606.ENSP00000441980	9606.ENSP00000342793	0	0	0	0	0	0	0.9	0.313	0.928
CEPT1	TMEM189-UBE2V1	9606.ENSP00000441980	9606.ENSP00000344166	0	0	0	0	0	0	0.9	0	0.9
CEPT1	PLD4	9606.ENSP00000441980	9606.ENSP00000376372	0	0	0	0	0	0	0.9	0	0.9
CEPT1	PLD3	9606.ENSP00000441980	9606.ENSP00000387050	0	0	0	0	0	0	0.9	0	0.9
EPT1	TMEM189-UBE2V1	9606.ENSP00000260585	9606.ENSP00000344166	0	0	0	0	0	0	0.9	0	0.9
EPT1	PLD4	9606.ENSP00000260585	9606.ENSP00000376372	0	0	0	0	0	0	0.9	0	0.9
EPT1	PLD3	9606.ENSP00000260585	9606.ENSP00000387050	0	0	0	0	0	0	0.9	0	0.9
EPT1	PLD1	9606.ENSP00000260585	9606.ENSP00000342793	0	0	0	0	0	0	0.9	0.19	0.915
EPT1	PLD2	9606.ENSP00000260585	9606.ENSP00000263088	0	0	0	0	0	0	0.9	0.211	0.917
EPT1	LPCAT4	9606.ENSP00000260585	9606.ENSP00000317300	0	0	0	0	0	0	0.9	0.287	0.925
LPCAT4	PLD2	9606.ENSP00000317300	9606.ENSP00000263088	0	0	0	0	0	0.059	0.9	0.107	0.908
LPCAT4	PLD4	9606.ENSP00000317300	9606.ENSP00000376372	0	0	0	0	0	0	0.9	0	0.9
LPCAT4	TMEM189-UBE2V1	9606.ENSP00000317300	9606.ENSP00000344166	0	0	0	0	0	0	0.9	0	0.9
LPCAT4	PLD3	9606.ENSP00000317300	9606.ENSP00000387050	0	0	0	0	0	0	0.9	0	0.9
LPCAT4	PLD1	9606.ENSP00000317300	9606.ENSP00000342793	0	0	0	0	0	0.059	0.9	0.107	0.908
PLD1	TMEM189-UBE2V1	9606.ENSP00000342793	9606.ENSP00000344166	0	0	0	0	0	0	0.9	0	0.9
PLD2	TMEM189-UBE2V1	9606.ENSP00000263088	9606.ENSP00000344166	0	0	0	0	0	0	0.9	0	0.9
PLD2	PLD4	9606.ENSP00000263088	9606.ENSP00000376372	0	0	0	0	0	0	0.8	0.65	0.927
PLD2	PLD3	9606.ENSP00000263088	9606.ENSP00000387050	0	0	0	0	0	0	0.8	0.795	0.957
PLD3	TMEM189-UBE2V1	9606.ENSP00000387050	9606.ENSP00000344166	0	0	0	0	0	0	0.9	0	0.9
PLD4	TMEM189-UBE2V1	9606.ENSP00000376372	9606.ENSP00000344166	0	0	0	0	0	0	0.9	0	0.9
TMEM189-UBE2V1	UBE2N	9606.ENSP00000344166	9606.ENSP00000316176	0	0	0	0	0	0.896	0	0.537	0.95
ANK3	SCN5A	9606.ENSP00000280772	9606.ENSP00000410257	0	0	0	0	0	0.284	0.6	0.988	0.996
CALM1	SCN5A	9606.ENSP00000349467	9606.ENSP00000410257	0	0	0	0	0	0.978	0	0.717	0.993
CALM3	SCN5A	9606.ENSP00000291295	9606.ENSP00000410257	0	0	0	0	0	0.982	0	0.568	0.992
DLG1	SCN5A	9606.ENSP00000345731	9606.ENSP00000410257	0	0	0	0	0	0.339	0	0.982	0.987
DMD	SNTA1	9606.ENSP00000354923	9606.ENSP00000217381	0	0	0	0	0	0.913	0.72	0.988	0.999
DMD	SCN5A	9606.ENSP00000354923	9606.ENSP00000410257	0	0	0	0	0	0	0	0.986	0.986
GJA1	PKP2	9606.ENSP00000282561	9606.ENSP00000070846	0	0	0	0	0	0.182	0	0.989	0.99
GJA1	SCN5A	9606.ENSP00000282561	9606.ENSP00000410257	0	0	0	0	0	0.058	0	0.984	0.984
PKP2	SCN5A	9606.ENSP00000070846	9606.ENSP00000410257	0	0	0	0	0	0	0	0.983	0.983
SCN1B	SCN4B	9606.ENSP00000396915	9606.ENSP00000322460	0	0	0	0	0	0.27	0.9	0.881	0.99
SCN1B	SCN5A	9606.ENSP00000396915	9606.ENSP00000410257	0	0	0	0	0	0	0.8	0.874	0.973
SCN4B	SCN5A	9606.ENSP00000322460	9606.ENSP00000410257	0	0	0	0	0	0	0.8	0.832	0.965
SCN5A	SNTA1	9606.ENSP00000410257	9606.ENSP00000217381	0	0	0	0	0	0.501	0	0.97	0.984
SLC36A2	SLC6A20	9606.ENSP00000334223	9606.ENSP00000346298	0	0	0	0	0	0	0	0.93	0.93
CTSB	TLR7	9606.ENSP00000345672	9606.ENSP00000370034	0	0	0	0	0	0	0.9	0.278	0.924
CTSL	TLR7	9606.ENSP00000345344	9606.ENSP00000370034	0	0	0	0	0	0	0.9	0.202	0.916
IRAK1	UBE2N	9606.ENSP00000358997	9606.ENSP00000316176	0	0	0	0	0	0.067	0.9	0.568	0.956
IRAK1	UBE2V1	9606.ENSP00000358997	9606.ENSP00000340305	0	0	0	0	0	0	0.9	0.562	0.954
IRAK1	TLR7	9606.ENSP00000358997	9606.ENSP00000370034	0	0	0	0	0	0.128	0.9	0.754	0.976
IRAK1	IRF7	9606.ENSP00000358997	9606.ENSP00000380697	0	0	0	0	0	0.612	0.8	0.892	0.99
IRAK1	MYD88	9606.ENSP00000358997	9606.ENSP00000401399	0	0	0	0	0	0.977	0.9	0.994	0.999
IRAK1	TRAF6	9606.ENSP00000358997	9606.ENSP00000433623	0	0	0	0	0	0.959	0.9	0.993	0.999
IRF7	UBE2N	9606.ENSP00000380697	9606.ENSP00000316176	0	0	0	0	0	0	0.9	0.293	0.926
IRF7	UBE2V1	9606.ENSP00000380697	9606.ENSP00000340305	0	0	0	0	0	0	0.9	0.283	0.925
IRF7	TLR7	9606.ENSP00000380697	9606.ENSP00000370034	0	0	0	0	0	0	0.6	0.862	0.942
IRF7	MYD88	9606.ENSP00000380697	9606.ENSP00000401399	0	0	0	0	0	0.686	0.6	0.99	0.998
IRF7	TRAF6	9606.ENSP00000380697	9606.ENSP00000433623	0	0	0	0	0	0.881	0.8	0.988	0.999
MYD88	UBE2N	9606.ENSP00000401399	9606.ENSP00000316176	0	0	0	0	0	0.057	0.9	0.649	0.964
MYD88	UBE2V1	9606.ENSP00000401399	9606.ENSP00000340305	0	0	0	0	0	0	0.9	0.502	0.948
MYD88	TLR7	9606.ENSP00000401399	9606.ENSP00000370034	0	0	0	0	0	0.353	0.9	0.99	0.999
MYD88	TRAF6	9606.ENSP00000401399	9606.ENSP00000433623	0	0	0	0	0	0.887	0.9	0.995	0.999
TLR7	UNC93B1	9606.ENSP00000370034	9606.ENSP00000227471	0	0	0	0	0	0	0.6	0.988	0.995
TLR7	TRPA1	9606.ENSP00000370034	9606.ENSP00000262209	0	0	0	0	0	0.068	0	0.922	0.924
TLR7	UBE2N	9606.ENSP00000370034	9606.ENSP00000316176	0	0	0	0	0	0.066	0.9	0.275	0.926
TLR7	UBE2V1	9606.ENSP00000370034	9606.ENSP00000340305	0	0	0	0	0	0.057	0.9	0.263	0.924
TLR7	TRAF6	9606.ENSP00000370034	9606.ENSP00000433623	0	0	0	0	0	0.058	0.9	0.711	0.97
TRAF6	UBE2N	9606.ENSP00000433623	9606.ENSP00000316176	0	0	0	0	0	0.991	0.9	0.993	0.999
TRAF6	UBE2V1	9606.ENSP00000433623	9606.ENSP00000340305	0	0	0	0	0	0.888	0.9	0.938	0.999
UBE2N	UBE2V1	9606.ENSP00000316176	9606.ENSP00000340305	0	0	0	0	0	0.946	0.9	0.99	0.999
CEPT1	EPT1	9606.ENSP00000441980	9606.ENSP00000260585	0	0	0	0.685	0	0	0.9	0.69	0.921
CEPT1	PLD2	9606.ENSP00000441980	9606.ENSP00000263088	0	0	0	0	0	0	0.9	0.29	0.926
CEPT1	LPCAT4	9606.ENSP00000441980	9606.ENSP00000317300	0	0	0	0	0	0	0.9	0.373	0.934
CEPT1	PLD1	9606.ENSP00000441980	9606.ENSP00000342793	0	0	0	0	0	0	0.9	0.313	0.928
CEPT1	TMEM189	9606.ENSP00000441980	9606.ENSP00000360715	0	0	0	0	0	0	0.9	0	0.9
CEPT1	PLD4	9606.ENSP00000441980	9606.ENSP00000376372	0	0	0	0	0	0	0.9	0	0.9
CEPT1	PLD3	9606.ENSP00000441980	9606.ENSP00000387050	0	0	0	0	0	0	0.9	0	0.9
EPT1	TMEM189	9606.ENSP00000260585	9606.ENSP00000360715	0	0	0	0	0	0	0.9	0	0.9
EPT1	PLD4	9606.ENSP00000260585	9606.ENSP00000376372	0	0	0	0	0	0	0.9	0	0.9
EPT1	PLD3	9606.ENSP00000260585	9606.ENSP00000387050	0	0	0	0	0	0	0.9	0	0.9
EPT1	PLD1	9606.ENSP00000260585	9606.ENSP00000342793	0	0	0	0	0	0	0.9	0.19	0.915
EPT1	PLD2	9606.ENSP00000260585	9606.ENSP00000263088	0	0	0	0	0	0	0.9	0.211	0.917
EPT1	LPCAT4	9606.ENSP00000260585	9606.ENSP00000317300	0	0	0	0	0	0	0.9	0.287	0.925
LPCAT4	PLD2	9606.ENSP00000317300	9606.ENSP00000263088	0	0	0	0	0	0.059	0.9	0.107	0.908
LPCAT4	TMEM189	9606.ENSP00000317300	9606.ENSP00000360715	0	0	0	0	0	0	0.9	0	0.9
LPCAT4	PLD4	9606.ENSP00000317300	9606.ENSP00000376372	0	0	0	0	0	0	0.9	0	0.9
LPCAT4	PLD3	9606.ENSP00000317300	9606.ENSP00000387050	0	0	0	0	0	0	0.9	0	0.9
LPCAT4	PLD1	9606.ENSP00000317300	9606.ENSP00000342793	0	0	0	0	0	0.059	0.9	0.107	0.908
PLD1	TMEM189	9606.ENSP00000342793	9606.ENSP00000360715	0	0	0	0	0	0	0.9	0	0.9
PLD2	TMEM189	9606.ENSP00000263088	9606.ENSP00000360715	0	0	0	0	0	0	0.9	0	0.9
PLD2	PLD4	9606.ENSP00000263088	9606.ENSP00000376372	0	0	0	0	0	0	0.8	0.65	0.927
PLD2	PLD3	9606.ENSP00000263088	9606.ENSP00000387050	0	0	0	0	0	0	0.8	0.795	0.957
PLD3	TMEM189	9606.ENSP00000387050	9606.ENSP00000360715	0	0	0	0	0	0	0.9	0	0.9
PLD4	TMEM189	9606.ENSP00000376372	9606.ENSP00000360715	0	0	0	0	0	0	0.9	0	0.9
AR	TMPRSS2	9606.ENSP00000363822	9606.ENSP00000381588	0	0	0	0	0	0.873	0	0.875	0.983
TNFRSF13B	TNFRSF17	9606.ENSP00000261652	9606.ENSP00000053243	0	0	0	0	0	0	0	0.987	0.987
TNFRSF13B	TRAF2	9606.ENSP00000261652	9606.ENSP00000247668	0	0	0	0	0	0.684	0.9	0.75	0.991
TNFRSF13B	TNFRSF13C	9606.ENSP00000261652	9606.ENSP00000291232	0	0	0	0	0	0	0	0.99	0.99
TNFRSF13B	TNFSF13B	9606.ENSP00000261652	9606.ENSP00000365048	0	0	0	0	0	0.791	0.9	0.989	0.999
TNFRSF13C	TNFRSF17	9606.ENSP00000291232	9606.ENSP00000053243	0	0	0	0	0	0	0	0.977	0.977
TNFRSF13C	TRAF2	9606.ENSP00000291232	9606.ENSP00000247668	0	0	0	0	0	0.345	0.8	0.373	0.91
TNFRSF13C	TRAF3	9606.ENSP00000291232	9606.ENSP00000454207	0	0	0	0	0	0.822	0.8	0.988	0.999
TNFRSF13C	TNFSF13B	9606.ENSP00000291232	9606.ENSP00000365048	0	0	0	0	0	0.969	0.8	0.99	0.999
TNFRSF17	TRAF3	9606.ENSP00000053243	9606.ENSP00000454207	0	0	0	0	0	0.32	0.9	0.495	0.962
TNFRSF17	TNFSF13B	9606.ENSP00000053243	9606.ENSP00000365048	0	0	0	0	0	0.949	0.9	0.989	0.999
TNFSF13B	TRAF2	9606.ENSP00000365048	9606.ENSP00000247668	0	0	0	0	0	0	0.9	0.343	0.931
TNFSF13B	TRAF3	9606.ENSP00000365048	9606.ENSP00000454207	0	0	0	0	0	0	0.9	0.726	0.971
TRAF2	TRAF3	9606.ENSP00000247668	9606.ENSP00000454207	0	0	0	0.843	0	0.81	0.9	0.978	0.983
IFNAR1	SOCS1	9606.ENSP00000270139	9606.ENSP00000329418	0	0	0	0	0	0.27	0.6	0.757	0.922
IFNAR1	STAT1	9606.ENSP00000270139	9606.ENSP00000354394	0	0	0	0	0	0.345	0.9	0.984	0.998
IFNAR1	TYK2	9606.ENSP00000270139	9606.ENSP00000431885	0	0	0	0	0	0.972	0.9	0.99	0.999
IFNAR1	IFNAR2	9606.ENSP00000270139	9606.ENSP00000343957	0	0	0	0	0	0.944	0.9	0.989	0.999
IFNAR1	STAT2	9606.ENSP00000270139	9606.ENSP00000315768	0	0	0	0	0	0.873	0.9	0.986	0.999
IFNAR2	STAT2	9606.ENSP00000343957	9606.ENSP00000315768	0	0	0	0	0	0.837	0.9	0.963	0.999
IFNAR2	STAT1	9606.ENSP00000343957	9606.ENSP00000354394	0	0	0	0	0	0.501	0.9	0.918	0.995
IFNAR2	TYK2	9606.ENSP00000343957	9606.ENSP00000431885	0	0	0	0	0	0.213	0.9	0.988	0.998
IL10RA	STAT1	9606.ENSP00000227752	9606.ENSP00000354394	0	0	0	0	0	0.117	0.9	0.658	0.967
IL10RA	TYK2	9606.ENSP00000227752	9606.ENSP00000431885	0	0	0	0	0	0	0.9	0.853	0.984
IL10RA	STAT3	9606.ENSP00000227752	9606.ENSP00000264657	0	0	0	0	0	0.182	0.9	0.984	0.998
IL10RA	IL10RB	9606.ENSP00000227752	9606.ENSP00000290200	0	0	0	0	0	0.27	0.9	0.995	0.999
IL10RB	TYK2	9606.ENSP00000290200	9606.ENSP00000431885	0	0	0	0	0	0.056	0.8	0.993	0.998
IL12RB1	STAT3	9606.ENSP00000470788	9606.ENSP00000264657	0	0	0	0	0	0.182	0.9	0.596	0.964
IL12RB1	SOCS1	9606.ENSP00000470788	9606.ENSP00000329418	0	0	0	0	0	0	0.9	0.333	0.93
IL12RB1	SOCS3	9606.ENSP00000470788	9606.ENSP00000330341	0	0	0	0	0	0	0.9	0.486	0.946
IL12RB1	STAT1	9606.ENSP00000470788	9606.ENSP00000354394	0	0	0	0	0	0.076	0.9	0.681	0.967
IL12RB1	TYK2	9606.ENSP00000470788	9606.ENSP00000431885	0	0	0	0	0	0.182	0.9	0.984	0.998
SOCS1	STAT3	9606.ENSP00000329418	9606.ENSP00000264657	0	0	0	0	0	0.161	0.6	0.768	0.915
SOCS1	STAT1	9606.ENSP00000329418	9606.ENSP00000354394	0	0	0	0	0	0.161	0.6	0.836	0.94
SOCS1	TYK2	9606.ENSP00000329418	9606.ENSP00000431885	0	0	0	0	0	0.515	0.9	0.979	0.998
SOCS3	STAT3	9606.ENSP00000330341	9606.ENSP00000264657	0	0	0	0	0	0.361	0.9	0.891	0.992
SOCS3	STAT2	9606.ENSP00000330341	9606.ENSP00000315768	0	0	0	0	0	0.161	0.8	0.704	0.946
SOCS3	TYK2	9606.ENSP00000330341	9606.ENSP00000431885	0	0	0	0	0	0.103	0.9	0.818	0.982
SOCS3	STAT1	9606.ENSP00000330341	9606.ENSP00000354394	0	0	0	0	0	0.161	0.9	0.808	0.982
STAT1	STAT3	9606.ENSP00000354394	9606.ENSP00000264657	0	0	0	0.948	0	0.882	0.9	0.989	0.988
STAT1	STAT2	9606.ENSP00000354394	9606.ENSP00000315768	0	0	0	0.889	0	0.881	0.9	0.992	0.988
STAT1	TYK2	9606.ENSP00000354394	9606.ENSP00000431885	0	0	0	0	0	0.518	0.9	0.912	0.995
STAT2	STAT3	9606.ENSP00000315768	9606.ENSP00000264657	0	0	0	0.867	0	0.345	0.9	0.847	0.939
STAT2	TYK2	9606.ENSP00000315768	9606.ENSP00000431885	0	0	0	0	0	0.294	0.9	0.918	0.993
STAT3	TYK2	9606.ENSP00000264657	9606.ENSP00000431885	0	0	0	0	0	0.14	0.9	0.897	0.99
XCL1	XCR1	9606.ENSP00000356792	9606.ENSP00000310405	0	0	0	0	0	0.226	0.8	0.994	0.999
XCL2	XCR1	9606.ENSP00000356793	9606.ENSP00000310405	0	0	0	0	0	0.226	0.8	0.961	0.993

## Sheet: T5 List of PPI with conf. 700
#node1	node2	node1_string_id	node2_string_id	neighborhood_on_chromosome	gene_fusion	phylogenetic_cooccurrence	homology	coexpression	experimentally_determined_interaction	database_annotated	automated_textmining	combined_score
IFNA1	USP18	9606.ENSP00000276927	9606.ENSP00000215794	0	0	0	0	0	0	0	0.77	0.77
IFNA1	IFNAR1	9606.ENSP00000276927	9606.ENSP00000270139	0	0	0	0	0	0.213	0.6	0.989	0.996
IFNA1	STAT2	9606.ENSP00000276927	9606.ENSP00000315768	0	0	0	0	0	0	0	0.831	0.831
IFNA1	STAT1	9606.ENSP00000276927	9606.ENSP00000354394	0	0	0	0	0	0	0	0.858	0.858
IFNA1	TYK2	9606.ENSP00000276927	9606.ENSP00000431885	0	0	0	0	0	0	0	0.933	0.933
IFNA1	JAK1	9606.ENSP00000276927	9606.ENSP00000343204	0	0	0	0	0	0	0.6	0.915	0.964
IFNA1	IFNAR2	9606.ENSP00000276927	9606.ENSP00000343957	0	0	0	0	0	0.27	0.6	0.988	0.996
IFNA2	IFNAR1	9606.ENSP00000369554	9606.ENSP00000270139	0	0	0	0	0	0.967	0.9	0.804	0.999
IFNA2	STAT2	9606.ENSP00000369554	9606.ENSP00000315768	0	0	0	0	0	0	0.6	0.537	0.806
IFNA2	JAK1	9606.ENSP00000369554	9606.ENSP00000343204	0	0	0	0	0	0	0.6	0.421	0.758
IFNA2	IFNAR2	9606.ENSP00000369554	9606.ENSP00000343957	0	0	0	0	0	0.973	0.9	0.899	0.999
IFNA2	STAT1	9606.ENSP00000369554	9606.ENSP00000354394	0	0	0	0	0	0	0.6	0.619	0.841
IFNA2	TYK2	9606.ENSP00000369554	9606.ENSP00000431885	0	0	0	0	0	0	0.6	0.398	0.748
IFNAR1	USP18	9606.ENSP00000270139	9606.ENSP00000215794	0	0	0	0	0	0	0	0.851	0.851
IFNAR1	IFNW1	9606.ENSP00000270139	9606.ENSP00000369578	0	0	0	0	0	0.932	0.8	0.472	0.992
IFNAR1	STAT1	9606.ENSP00000270139	9606.ENSP00000354394	0	0	0	0	0	0.345	0.9	0.984	0.998
IFNAR1	TYK2	9606.ENSP00000270139	9606.ENSP00000431885	0	0	0	0	0	0.972	0.9	0.99	0.999
IFNAR1	IFNAR2	9606.ENSP00000270139	9606.ENSP00000343957	0	0	0	0	0	0.944	0.9	0.989	0.999
IFNAR1	IFNB1	9606.ENSP00000270139	9606.ENSP00000369581	0	0	0	0	0	0.752	0.9	0.989	0.999
IFNAR1	STAT2	9606.ENSP00000270139	9606.ENSP00000315768	0	0	0	0	0	0.873	0.9	0.986	0.999
IFNAR1	JAK1	9606.ENSP00000270139	9606.ENSP00000343204	0	0	0	0	0	0.281	0.9	0.989	0.999
IFNAR2	USP18	9606.ENSP00000343957	9606.ENSP00000215794	0	0	0	0	0	0.675	0.8	0.988	0.999
IFNAR2	STAT2	9606.ENSP00000343957	9606.ENSP00000315768	0	0	0	0	0	0.837	0.9	0.963	0.999
IFNAR2	JAK1	9606.ENSP00000343957	9606.ENSP00000343204	0	0	0	0	0	0.486	0.9	0.989	0.999
IFNAR2	IFNW1	9606.ENSP00000343957	9606.ENSP00000369578	0	0	0	0	0	0.927	0.8	0.511	0.992
IFNAR2	STAT1	9606.ENSP00000343957	9606.ENSP00000354394	0	0	0	0	0	0.501	0.9	0.918	0.995
IFNAR2	IFNB1	9606.ENSP00000343957	9606.ENSP00000369581	0	0	0	0	0	0.27	0.9	0.986	0.998
IFNAR2	TYK2	9606.ENSP00000343957	9606.ENSP00000431885	0	0	0	0	0	0.213	0.9	0.988	0.998
IFNB1	STAT2	9606.ENSP00000369581	9606.ENSP00000315768	0	0	0	0	0	0	0.9	0.821	0.981
IFNB1	JAK1	9606.ENSP00000369581	9606.ENSP00000343204	0	0	0	0	0	0	0.9	0.683	0.966
IFNB1	STAT1	9606.ENSP00000369581	9606.ENSP00000354394	0	0	0	0	0	0	0.9	0.855	0.984
IFNB1	TYK2	9606.ENSP00000369581	9606.ENSP00000431885	0	0	0	0	0	0	0.9	0.69	0.967
JAK1	USP18	9606.ENSP00000343204	9606.ENSP00000215794	0	0	0	0	0	0.058	0.9	0.591	0.958
JAK1	STAT2	9606.ENSP00000343204	9606.ENSP00000315768	0	0	0	0	0	0.294	0.9	0.891	0.991
JAK1	TYK2	9606.ENSP00000343204	9606.ENSP00000431885	0	0	0	0.926	0	0.462	0.9	0.992	0.948
JAK1	STAT1	9606.ENSP00000343204	9606.ENSP00000354394	0	0	0	0	0	0.711	0.9	0.99	0.999
STAT1	USP18	9606.ENSP00000354394	9606.ENSP00000215794	0	0	0	0	0	0	0.9	0.672	0.965
STAT1	STAT2	9606.ENSP00000354394	9606.ENSP00000315768	0	0	0	0.889	0	0.881	0.9	0.992	0.988
STAT1	TYK2	9606.ENSP00000354394	9606.ENSP00000431885	0	0	0	0	0	0.518	0.9	0.912	0.995
STAT2	USP18	9606.ENSP00000315768	9606.ENSP00000215794	0	0	0	0	0	0.486	0	0.837	0.912
STAT2	TYK2	9606.ENSP00000315768	9606.ENSP00000431885	0	0	0	0	0	0.294	0.9	0.918	0.993
A2M	APOA1	9606.ENSP00000323929	9606.ENSP00000236850	0	0	0	0	0	0	0.9	0.73	0.971
A2M	LRP1	9606.ENSP00000323929	9606.ENSP00000243077	0	0	0	0	0	0.709	0	0.989	0.996
A2M	IL1B	9606.ENSP00000323929	9606.ENSP00000263341	0	0	0	0	0	0.6	0	0.927	0.969
A2M	KLKB1	9606.ENSP00000323929	9606.ENSP00000264690	0	0	0	0	0	0.134	0.6	0.933	0.974
A2M	KLK3	9606.ENSP00000323929	9606.ENSP00000314151	0	0	0	0	0	0.705	0	0.969	0.99
A2M	IL10	9606.ENSP00000323929	9606.ENSP00000412237	0	0	0	0	0	0.632	0	0.841	0.938
A2M	ELANE	9606.ENSP00000323929	9606.ENSP00000466090	0	0	0	0	0	0.134	0	0.963	0.966
A2M	HAMP	9606.ENSP00000323929	9606.ENSP00000471894	0	0	0	0	0	0	0	0.981	0.981
A2M	KLK4	9606.ENSP00000323929	9606.ENSP00000326159	0	0	0	0	0	0.134	0	0.989	0.99
A2M	HSPA5	9606.ENSP00000323929	9606.ENSP00000324173	0	0	0	0	0	0.669	0	0.994	0.998
APOA1	LRP1	9606.ENSP00000236850	9606.ENSP00000243077	0	0	0	0	0	0	0.9	0.369	0.934
IL10	IL1B	9606.ENSP00000412237	9606.ENSP00000263341	0	0	0	0	0	0	0.9	0.959	0.995
ABO	FUT9	9606.ENSP00000483018	9606.ENSP00000302599	0	0	0	0	0	0	0.9	0	0.9
ABO	FUT3	9606.ENSP00000483018	9606.ENSP00000305603	0	0	0	0	0	0	0.9	0.119	0.908
ABO	FUT1	9606.ENSP00000483018	9606.ENSP00000312021	0	0	0	0	0	0	0.9	0.198	0.916
ABO	FUT6	9606.ENSP00000483018	9606.ENSP00000313398	0	0	0	0	0	0	0.9	0.134	0.909
ABO	FUT4	9606.ENSP00000483018	9606.ENSP00000351602	0	0	0	0	0	0	0.9	0	0.9
ABO	FUT2	9606.ENSP00000483018	9606.ENSP00000387498	0	0	0	0	0	0	0.9	0.236	0.92
ABO	CSRP3	9606.ENSP00000483018	9606.ENSP00000431813	0	0	0	0	0	0	0	0.768	0.768
ABO	FUT5	9606.ENSP00000483018	9606.ENSP00000466880	0	0	0	0	0	0	0.9	0	0.9
FUT1	FUT9	9606.ENSP00000312021	9606.ENSP00000302599	0	0	0	0	0	0	0.9	0.786	0.977
FUT1	FUT3	9606.ENSP00000312021	9606.ENSP00000305603	0	0	0	0	0	0	0.9	0.864	0.985
FUT1	FUT2	9606.ENSP00000312021	9606.ENSP00000387498	0	0	0	0.96	0	0	0.8	0.907	0.807
FUT1	FUT6	9606.ENSP00000312021	9606.ENSP00000313398	0	0	0	0	0	0	0.9	0.77	0.976
FUT1	FUT4	9606.ENSP00000312021	9606.ENSP00000351602	0	0	0	0	0	0	0.9	0.777	0.976
FUT1	FUT5	9606.ENSP00000312021	9606.ENSP00000466880	0	0	0	0	0	0	0.9	0.798	0.979
FUT2	FUT9	9606.ENSP00000387498	9606.ENSP00000302599	0	0	0	0	0	0	0.9	0.699	0.968
FUT2	FUT3	9606.ENSP00000387498	9606.ENSP00000305603	0	0	0	0	0	0	0.9	0.903	0.989
FUT2	FUT6	9606.ENSP00000387498	9606.ENSP00000313398	0	0	0	0	0	0	0.9	0.753	0.974
FUT2	FUT4	9606.ENSP00000387498	9606.ENSP00000351602	0	0	0	0	0	0	0.9	0.787	0.977
FUT2	FUT5	9606.ENSP00000387498	9606.ENSP00000466880	0	0	0	0	0	0	0.9	0.797	0.978
FUT3	FUT9	9606.ENSP00000305603	9606.ENSP00000302599	0	0	0	0.877	0	0	0.9	0.81	0.909
FUT3	FUT6	9606.ENSP00000305603	9606.ENSP00000313398	0	0	0	0.98	0	0	0.8	0.904	0.803
FUT3	FUT5	9606.ENSP00000305603	9606.ENSP00000466880	0	0	0	0.983	0	0	0.8	0.901	0.803
FUT3	FUT4	9606.ENSP00000305603	9606.ENSP00000351602	0	0	0	0.877	0	0	0.9	0.831	0.91
FUT4	FUT9	9606.ENSP00000351602	9606.ENSP00000302599	0	0	0	0.884	0	0	0.9	0.873	0.91
FUT4	FUT6	9606.ENSP00000351602	9606.ENSP00000313398	0	0	0	0.875	0	0	0.9	0.802	0.909
FUT4	FUT5	9606.ENSP00000351602	9606.ENSP00000466880	0	0	0	0.873	0	0	0.9	0.822	0.91
FUT5	FUT9	9606.ENSP00000466880	9606.ENSP00000302599	0	0	0	0.881	0	0	0.9	0.798	0.909
FUT5	FUT6	9606.ENSP00000466880	9606.ENSP00000313398	0	0	0	0.982	0	0	0.8	0.902	0.803
FUT6	FUT9	9606.ENSP00000313398	9606.ENSP00000302599	0	0	0	0.88	0	0	0.9	0.811	0.909
ACE	KNG1	9606.ENSP00000290866	9606.ENSP00000265023	0	0	0	0	0	0	0.8	0.914	0.982
ACE	REN	9606.ENSP00000290866	9606.ENSP00000272190	0	0	0	0	0	0	0	0.967	0.967
ACE	RHOC	9606.ENSP00000290866	9606.ENSP00000285735	0	0	0	0	0	0.932	0	0.053	0.932
ACE	NR3C2	9606.ENSP00000290866	9606.ENSP00000350815	0	0	0	0	0	0	0	0.86	0.86
ACE	MME	9606.ENSP00000290866	9606.ENSP00000418525	0	0	0	0	0	0	0	0.862	0.862
ACE	BDKRB2	9606.ENSP00000290866	9606.ENSP00000450482	0	0	0	0	0	0.491	0	0.764	0.875
ACE	AGTR2	9606.ENSP00000290866	9606.ENSP00000360973	0	0	0	0	0	0.213	0	0.895	0.914
ACE	AGTR1	9606.ENSP00000290866	9606.ENSP00000419422	0	0	0	0	0	0	0	0.922	0.922
ACE	RHOA	9606.ENSP00000290866	9606.ENSP00000400175	0	0	0	0	0	0.941	0	0.399	0.963
ACE	AGT	9606.ENSP00000290866	9606.ENSP00000355627	0	0	0	0	0	0.822	0.9	0.94	0.998
AGT	KNG1	9606.ENSP00000355627	9606.ENSP00000265023	0	0	0	0	0	0.213	0.3	0.61	0.766
AGT	REN	9606.ENSP00000355627	9606.ENSP00000272190	0	0	0	0	0	0.936	0.9	0.992	0.999
AGT	BDKRB2	9606.ENSP00000355627	9606.ENSP00000450482	0	0	0	0	0	0	0.8	0.369	0.868
AGT	MME	9606.ENSP00000355627	9606.ENSP00000418525	0	0	0	0	0	0.27	0.9	0.463	0.957
AGT	AGTR1	9606.ENSP00000355627	9606.ENSP00000419422	0	0	0	0	0	0.501	0.9	0.872	0.993
AGT	AGTR2	9606.ENSP00000355627	9606.ENSP00000360973	0	0	0	0	0	0.846	0.9	0.902	0.998
AGTR1	KNG1	9606.ENSP00000419422	9606.ENSP00000265023	0	0	0	0	0	0	0	0.987	0.987
AGTR1	REN	9606.ENSP00000419422	9606.ENSP00000272190	0	0	0	0	0	0	0	0.942	0.942
AGTR1	AGTR2	9606.ENSP00000419422	9606.ENSP00000360973	0	0	0	0.844	0	0	0.8	0.906	0.828
AGTR2	KNG1	9606.ENSP00000360973	9606.ENSP00000265023	0	0	0	0	0	0	0	0.737	0.737
AGTR2	REN	9606.ENSP00000360973	9606.ENSP00000272190	0	0	0	0	0	0	0	0.893	0.893
BDKRB2	KNG1	9606.ENSP00000450482	9606.ENSP00000265023	0	0	0	0	0	0.27	0.9	0.981	0.998
KNG1	MME	9606.ENSP00000265023	9606.ENSP00000418525	0	0	0	0	0	0	0	0.73	0.73
KNG1	REN	9606.ENSP00000265023	9606.ENSP00000272190	0	0	0	0	0	0	0	0.929	0.929
MME	REN	9606.ENSP00000418525	9606.ENSP00000272190	0	0	0	0	0	0.062	0	0.721	0.727
NR3C2	REN	9606.ENSP00000350815	9606.ENSP00000272190	0	0	0	0	0	0.056	0	0.86	0.863
RHOA	RHOC	9606.ENSP00000400175	9606.ENSP00000285735	0	0	0	0.984	0	0.736	0.9	0.838	0.972
ACE2	MEP1A	9606.ENSP00000389326	9606.ENSP00000230588	0	0	0	0	0	0	0.8	0.543	0.904
ACE2	REN	9606.ENSP00000389326	9606.ENSP00000272190	0	0	0	0	0	0	0	0.965	0.965
ACE2	SLC6A19	9606.ENSP00000389326	9606.ENSP00000305302	0	0	0	0	0	0.974	0	0.975	0.999
ACE2	CLEC4M	9606.ENSP00000389326	9606.ENSP00000316228	0	0	0	0	0	0	0	0.898	0.898
ACE2	DPP4	9606.ENSP00000389326	9606.ENSP00000353731	0	0	0	0	0	0	0.8	0.903	0.979
ACE2	AGT	9606.ENSP00000389326	9606.ENSP00000355627	0	0	0	0	0	0.845	0.9	0.878	0.997
ACE2	PRCP	9606.ENSP00000389326	9606.ENSP00000377055	0	0	0	0	0	0	0.8	0.659	0.929
ACE2	TMPRSS2	9606.ENSP00000389326	9606.ENSP00000381588	0	0	0	0	0	0.27	0	0.866	0.898
ACE2	SLC1A7	9606.ENSP00000389326	9606.ENSP00000478639	0	0	0	0	0	0	0	0.923	0.923
ACE2	MME	9606.ENSP00000389326	9606.ENSP00000418525	0	0	0	0	0	0	0.8	0.754	0.948
AGT	REN	9606.ENSP00000355627	9606.ENSP00000272190	0	0	0	0	0	0.936	0.9	0.992	0.999
AGT	MME	9606.ENSP00000355627	9606.ENSP00000418525	0	0	0	0	0	0.27	0.9	0.463	0.957
DPP4	MEP1A	9606.ENSP00000353731	9606.ENSP00000230588	0	0	0	0	0	0	0.8	0.092	0.81
DPP4	PRCP	9606.ENSP00000353731	9606.ENSP00000377055	0	0	0	0	0	0	0.8	0.566	0.909
DPP4	MME	9606.ENSP00000353731	9606.ENSP00000418525	0	0	0	0	0	0	0.8	0.663	0.929
MEP1A	MME	9606.ENSP00000230588	9606.ENSP00000418525	0	0	0	0	0	0	0.8	0.159	0.824
MEP1A	PRCP	9606.ENSP00000230588	9606.ENSP00000377055	0	0	0	0	0	0	0.8	0.608	0.918
MME	REN	9606.ENSP00000418525	9606.ENSP00000272190	0	0	0	0	0	0.062	0	0.721	0.727
MME	PRCP	9606.ENSP00000418525	9606.ENSP00000377055	0	0	0	0	0	0	0.8	0.511	0.898
SLC1A7	SLC6A19	9606.ENSP00000478639	9606.ENSP00000305302	0	0	0	0	0	0	0	0.844	0.844
AHNAK	CACNA1C	9606.ENSP00000367263	9606.ENSP00000266376	0	0	0	0	0	0.072	0	0.831	0.836
AHNAK	FTH1	9606.ENSP00000367263	9606.ENSP00000273550	0	0	0	0	0	0	0	0.769	0.769
AHNAK	S100B	9606.ENSP00000367263	9606.ENSP00000291700	0	0	0	0	0	0.27	0	0.957	0.967
AHNAK	COX8A	9606.ENSP00000367263	9606.ENSP00000321260	0	0	0	0	0	0	0	0.77	0.77
AHNAK	ANXA2	9606.ENSP00000367263	9606.ENSP00000346032	0	0	0	0	0	0.574	0.8	0.989	0.999
AHNAK	AHNAK2	9606.ENSP00000367263	9606.ENSP00000353114	0	0	0	0.662	0	0	0.8	0.643	0.842
AHNAK	S100A10	9606.ENSP00000367263	9606.ENSP00000357801	0	0	0	0	0	0.926	0.8	0.976	0.999
AHNAK	SF1	9606.ENSP00000367263	9606.ENSP00000366604	0	0	0	0	0	0	0	0.77	0.77
AHNAK	FKBP2	9606.ENSP00000367263	9606.ENSP00000378046	0	0	0	0	0	0	0	0.769	0.769
AHNAK	DYSF	9606.ENSP00000367263	9606.ENSP00000386881	0	0	0	0	0	0	0	0.981	0.981
AHNAK2	ANXA2	9606.ENSP00000353114	9606.ENSP00000346032	0	0	0	0	0	0.129	0.8	0.147	0.838
AHNAK2	S100A10	9606.ENSP00000353114	9606.ENSP00000357801	0	0	0	0	0	0	0.8	0.176	0.828
ANXA2	DYSF	9606.ENSP00000346032	9606.ENSP00000386881	0	0	0	0	0	0.302	0.8	0.921	0.988
ANXA2	S100A10	9606.ENSP00000346032	9606.ENSP00000357801	0	0	0	0	0	0.901	0.9	0.989	0.999
COX8A	FTH1	9606.ENSP00000321260	9606.ENSP00000273550	0	0	0	0	0	0	0	0.811	0.811
COX8A	FKBP2	9606.ENSP00000321260	9606.ENSP00000378046	0	0	0	0	0	0	0	0.769	0.769
COX8A	SF1	9606.ENSP00000321260	9606.ENSP00000366604	0	0	0	0	0	0	0	0.8	0.8
FKBP2	FTH1	9606.ENSP00000378046	9606.ENSP00000273550	0	0	0	0	0	0	0	0.768	0.768
FKBP2	SF1	9606.ENSP00000378046	9606.ENSP00000366604	0	0	0	0	0	0.057	0	0.773	0.776
FTH1	SF1	9606.ENSP00000273550	9606.ENSP00000366604	0	0	0	0	0	0	0	0.769	0.769
ABCA12	TGM1	9606.ENSP00000272895	9606.ENSP00000206765	0	0	0	0	0	0	0	0.823	0.823
ABCA12	CYP4F22	9606.ENSP00000272895	9606.ENSP00000269703	0	0	0	0	0	0.056	0	0.832	0.834
ABCA12	LIPN	9606.ENSP00000272895	9606.ENSP00000383923	0	0	0	0	0	0	0	0.702	0.702
ABCA12	PNPLA1	9606.ENSP00000272895	9606.ENSP00000378072	0	0	0	0	0	0	0	0.74	0.74
ABCA12	ALOXE3	9606.ENSP00000272895	9606.ENSP00000314879	0	0	0	0	0	0	0	0.805	0.805
ABCA12	NIPAL4	9606.ENSP00000272895	9606.ENSP00000311687	0	0	0	0	0	0	0	0.855	0.855
ABHD5	ALOXE3	9606.ENSP00000390849	9606.ENSP00000314879	0	0	0	0	0	0	0	0.765	0.765
ABHD5	PNPLA1	9606.ENSP00000390849	9606.ENSP00000378072	0	0	0	0	0	0.224	0	0.895	0.915
ALOXE3	TGM1	9606.ENSP00000314879	9606.ENSP00000206765	0	0	0	0	0	0.234	0	0.752	0.802
ALOXE3	CYP4F22	9606.ENSP00000314879	9606.ENSP00000269703	0	0	0	0	0	0	0	0.867	0.867
ALOXE3	CERS3	9606.ENSP00000314879	9606.ENSP00000284382	0	0	0	0	0	0	0	0.732	0.732
ALOXE3	NIPAL4	9606.ENSP00000314879	9606.ENSP00000311687	0	0	0	0	0	0	0	0.874	0.874
ALOXE3	PPP1R3D	9606.ENSP00000314879	9606.ENSP00000360035	0	0	0	0	0	0	0	0.736	0.736
ALOXE3	HES7	9606.ENSP00000314879	9606.ENSP00000446205	0	0	0	0	0	0	0	0.765	0.765
ALOXE3	LIPN	9606.ENSP00000314879	9606.ENSP00000383923	0	0	0	0	0	0	0	0.786	0.786
ALOXE3	PNPLA1	9606.ENSP00000314879	9606.ENSP00000378072	0	0	0	0	0	0	0	0.816	0.816
CERS3	CYP4F22	9606.ENSP00000284382	9606.ENSP00000269703	0	0	0	0	0	0.139	0	0.75	0.775
CERS3	PNPLA1	9606.ENSP00000284382	9606.ENSP00000378072	0	0	0	0	0	0	0	0.789	0.789
CERS3	NIPAL4	9606.ENSP00000284382	9606.ENSP00000311687	0	0	0	0	0	0	0	0.785	0.785
CYP4F22	TGM1	9606.ENSP00000269703	9606.ENSP00000206765	0	0	0	0	0	0	0	0.758	0.758
CYP4F22	LIPN	9606.ENSP00000269703	9606.ENSP00000383923	0	0	0	0	0	0.078	0	0.804	0.812
CYP4F22	PNPLA1	9606.ENSP00000269703	9606.ENSP00000378072	0	0	0	0	0	0	0	0.825	0.825
CYP4F22	NIPAL4	9606.ENSP00000269703	9606.ENSP00000311687	0	0	0	0	0	0	0	0.922	0.922
LIPN	NIPAL4	9606.ENSP00000383923	9606.ENSP00000311687	0	0	0	0	0	0	0	0.808	0.808
LIPN	PNPLA1	9606.ENSP00000383923	9606.ENSP00000378072	0	0	0	0	0	0.149	0	0.751	0.779
NIPAL4	TGM1	9606.ENSP00000311687	9606.ENSP00000206765	0	0	0	0	0	0	0	0.892	0.892
NIPAL4	PNPLA1	9606.ENSP00000311687	9606.ENSP00000378072	0	0	0	0	0	0	0	0.842	0.842
APOA1	APOB	9606.ENSP00000236850	9606.ENSP00000233242	0	0	0	0	0	0.698	0.72	0.928	0.993
APOA1	VLDLR	9606.ENSP00000236850	9606.ENSP00000371532	0	0	0	0	0	0	0.54	0.464	0.742
APOA1	LRP8	9606.ENSP00000236850	9606.ENSP00000303634	0	0	0	0	0	0	0.9	0.335	0.93
APOA1	LRP1	9606.ENSP00000236850	9606.ENSP00000243077	0	0	0	0	0	0	0.9	0.369	0.934
APOA1	APP	9606.ENSP00000236850	9606.ENSP00000284981	0	0	0	0	0	0.68	0.72	0.457	0.947
APOA1	LDLR	9606.ENSP00000236850	9606.ENSP00000454071	0	0	0	0	0	0	0.9	0.711	0.969
APOA1	APOE	9606.ENSP00000236850	9606.ENSP00000252486	0	0	0	0	0	0.371	0.8	0.981	0.997
APOB	APP	9606.ENSP00000233242	9606.ENSP00000284981	0	0	0	0	0	0.11	0.72	0.349	0.823
APOB	LRP8	9606.ENSP00000233242	9606.ENSP00000303634	0	0	0	0	0	0.148	0.6	0.559	0.836
APOB	VLDLR	9606.ENSP00000233242	9606.ENSP00000371532	0	0	0	0	0	0.148	0.6	0.616	0.857
APOB	LRP1	9606.ENSP00000233242	9606.ENSP00000243077	0	0	0	0	0	0.111	0.9	0.569	0.958
APOB	APOE	9606.ENSP00000233242	9606.ENSP00000252486	0	0	0	0	0	0.385	0.72	0.991	0.998
APOB	LDLR	9606.ENSP00000233242	9606.ENSP00000454071	0	0	0	0	0	0.696	0.8	0.989	0.999
APOE	LRP1	9606.ENSP00000252486	9606.ENSP00000243077	0	0	0	0	0	0.789	0.9	0.989	0.999
APOE	TREM2	9606.ENSP00000252486	9606.ENSP00000362205	0	0	0	0	0	0.62	0	0.988	0.995
APOE	SORL1	9606.ENSP00000252486	9606.ENSP00000260197	0	0	0	0	0	0.622	0	0.987	0.994
APOE	MAPT	9606.ENSP00000252486	9606.ENSP00000340820	0	0	0	0	0	0.823	0	0.983	0.996
APOE	VLDLR	9606.ENSP00000252486	9606.ENSP00000371532	0	0	0	0	0	0.473	0.54	0.988	0.996
APOE	LDLR	9606.ENSP00000252486	9606.ENSP00000454071	0	0	0	0	0	0.745	0.6	0.989	0.998
APOE	APP	9606.ENSP00000252486	9606.ENSP00000284981	0	0	0	0	0	0.871	0.72	0.972	0.998
APOE	LRP8	9606.ENSP00000252486	9606.ENSP00000303634	0	0	0	0	0	0.683	0.9	0.989	0.999
APP	LRP1	9606.ENSP00000284981	9606.ENSP00000243077	0	0	0	0	0	0.684	0	0.974	0.991
APP	SORL1	9606.ENSP00000284981	9606.ENSP00000260197	0	0	0	0	0	0.887	0.8	0.989	0.999
APP	TREM2	9606.ENSP00000284981	9606.ENSP00000362205	0	0	0	0	0	0.419	0	0.722	0.831
APP	VLDLR	9606.ENSP00000284981	9606.ENSP00000371532	0	0	0	0	0	0.058	0.54	0.64	0.83
APP	LDLR	9606.ENSP00000284981	9606.ENSP00000454071	0	0	0	0	0	0.058	0.54	0.787	0.9
APP	LRP8	9606.ENSP00000284981	9606.ENSP00000303634	0	0	0	0	0	0.282	0	0.914	0.935
APP	MAPT	9606.ENSP00000284981	9606.ENSP00000340820	0	0	0	0	0	0.746	0	0.883	0.969
LDLR	VLDLR	9606.ENSP00000454071	9606.ENSP00000371532	0	0	0	0.943	0	0.397	0.54	0.762	0.723
LRP8	VLDLR	9606.ENSP00000303634	9606.ENSP00000371532	0	0	0	0.94	0	0.312	0.9	0.989	0.932
BDP1	SNAPC1	9606.ENSP00000351575	9606.ENSP00000216294	0	0	0	0	0	0.356	0.6	0.6	0.887
BDP1	BRF2	9606.ENSP00000351575	9606.ENSP00000220659	0	0	0	0	0	0.952	0.8	0.877	0.998
BDP1	POLR3B	9606.ENSP00000351575	9606.ENSP00000228347	0	0	0	0	0	0.709	0.6	0.653	0.956
BDP1	GTF3C3	9606.ENSP00000351575	9606.ENSP00000263956	0	0	0	0	0	0.751	0.9	0.824	0.995
BDP1	POLR3H	9606.ENSP00000351575	9606.ENSP00000347345	0	0	0	0	0	0.559	0.6	0.55	0.913
BDP1	POLR1C	9606.ENSP00000351575	9606.ENSP00000361465	0	0	0	0	0	0.559	0.6	0.479	0.9
BDP1	POLR3D	9606.ENSP00000351575	9606.ENSP00000380904	0	0	0	0	0	0.551	0.6	0.707	0.942
BDP1	POLR3A	9606.ENSP00000351575	9606.ENSP00000361446	0	0	0	0	0	0.732	0.6	0.875	0.985
BDP1	POLR3F	9606.ENSP00000351575	9606.ENSP00000366828	0	0	0	0	0	0.739	0.6	0.931	0.992
BDP1	TBP	9606.ENSP00000351575	9606.ENSP00000375942	0	0	0	0	0	0.952	0.8	0.993	0.999
BRF2	SNAPC1	9606.ENSP00000220659	9606.ENSP00000216294	0	0	0	0	0	0	0.6	0.705	0.877
BRF2	POLR1C	9606.ENSP00000220659	9606.ENSP00000361465	0	0	0	0	0	0.657	0.6	0.192	0.879
BRF2	POLR3H	9606.ENSP00000220659	9606.ENSP00000347345	0	0	0	0	0	0.687	0.6	0.189	0.889
BRF2	POLR3A	9606.ENSP00000220659	9606.ENSP00000361446	0	0	0	0	0	0.593	0.6	0.364	0.887
BRF2	POLR3B	9606.ENSP00000220659	9606.ENSP00000228347	0	0	0	0	0	0.631	0.6	0.403	0.904
BRF2	POLR3D	9606.ENSP00000220659	9606.ENSP00000380904	0	0	0	0	0	0.672	0.6	0.385	0.912
BRF2	GTF3C3	9606.ENSP00000220659	9606.ENSP00000263956	0	0	0	0	0	0.616	0.72	0.535	0.945
BRF2	POLR3F	9606.ENSP00000220659	9606.ENSP00000366828	0	0	0	0	0	0.761	0.6	0.746	0.973
BRF2	TBP	9606.ENSP00000220659	9606.ENSP00000375942	0	0	0	0	0	0.951	0.8	0.645	0.996
GTF3C3	POLR3B	9606.ENSP00000263956	9606.ENSP00000228347	0	0	0	0	0	0.169	0.6	0.554	0.838
GTF3C3	POLR3H	9606.ENSP00000263956	9606.ENSP00000347345	0	0	0	0	0	0	0.6	0.314	0.714
GTF3C3	POLR3F	9606.ENSP00000263956	9606.ENSP00000366828	0	0	0	0	0	0.148	0.6	0.609	0.855
GTF3C3	TBP	9606.ENSP00000263956	9606.ENSP00000375942	0	0	0	0	0	0.297	0.6	0.556	0.864
GTF3C3	POLR3D	9606.ENSP00000263956	9606.ENSP00000380904	0	0	0	0	0	0.325	0.6	0.599	0.882
GTF3C3	POLR3A	9606.ENSP00000263956	9606.ENSP00000361446	0	0	0	0	0	0.331	0.6	0.685	0.908
POLR1C	SNAPC1	9606.ENSP00000361465	9606.ENSP00000216294	0	0	0	0	0	0	0.6	0.41	0.754
POLR1C	POLR3B	9606.ENSP00000361465	9606.ENSP00000228347	0	0	0	0	0	0.991	0.9	0.64	0.999
POLR1C	POLR3H	9606.ENSP00000361465	9606.ENSP00000347345	0	0	0	0	0	0.991	0.9	0.784	0.999
POLR1C	POLR3A	9606.ENSP00000361465	9606.ENSP00000361446	0	0	0	0	0	0.991	0.9	0.723	0.999
POLR1C	TBP	9606.ENSP00000361465	9606.ENSP00000375942	0	0	0	0	0	0.389	0.6	0.374	0.833
POLR1C	POLR3F	9606.ENSP00000361465	9606.ENSP00000366828	0	0	0	0	0	0.991	0.9	0.807	0.999
POLR1C	POLR3D	9606.ENSP00000361465	9606.ENSP00000380904	0	0	0	0	0	0.986	0.9	0.846	0.999
POLR3A	POLR3B	9606.ENSP00000361446	9606.ENSP00000228347	0	0	0	0	0	0.991	0.9	0.956	0.999
POLR3A	POLR3H	9606.ENSP00000361446	9606.ENSP00000347345	0	0	0	0	0	0.991	0.9	0.802	0.999
POLR3A	TBP	9606.ENSP00000361446	9606.ENSP00000375942	0	0	0	0	0	0.389	0.6	0.608	0.896
POLR3A	POLR3F	9606.ENSP00000361446	9606.ENSP00000366828	0	0	0	0	0	0.978	0.9	0.845	0.999
POLR3A	POLR3D	9606.ENSP00000361446	9606.ENSP00000380904	0	0	0	0	0	0.989	0.9	0.803	0.999
POLR3B	TBP	9606.ENSP00000228347	9606.ENSP00000375942	0	0	0	0	0	0.399	0.6	0.213	0.794
POLR3B	POLR3D	9606.ENSP00000228347	9606.ENSP00000380904	0	0	0	0	0	0.991	0.9	0.786	0.999
POLR3B	POLR3H	9606.ENSP00000228347	9606.ENSP00000347345	0	0	0	0	0	0.991	0.9	0.803	0.999
POLR3B	POLR3F	9606.ENSP00000228347	9606.ENSP00000366828	0	0	0	0	0	0.978	0.9	0.803	0.999
POLR3D	SNAPC1	9606.ENSP00000380904	9606.ENSP00000216294	0	0	0	0	0	0	0.6	0.584	0.826
POLR3D	POLR3H	9606.ENSP00000380904	9606.ENSP00000347345	0	0	0	0	0	0.99	0.9	0.835	0.999
POLR3D	POLR3F	9606.ENSP00000380904	9606.ENSP00000366828	0	0	0	0	0	0.984	0.9	0.867	0.999
POLR3D	TBP	9606.ENSP00000380904	9606.ENSP00000375942	0	0	0	0	0	0.454	0.6	0.426	0.863
POLR3F	SNAPC1	9606.ENSP00000366828	9606.ENSP00000216294	0	0	0	0	0	0	0.6	0.611	0.838
POLR3F	POLR3H	9606.ENSP00000366828	9606.ENSP00000347345	0	0	0	0	0	0.982	0.9	0.863	0.999
POLR3F	TBP	9606.ENSP00000366828	9606.ENSP00000375942	0	0	0	0	0	0.536	0.6	0.461	0.891
POLR3H	SNAPC1	9606.ENSP00000347345	9606.ENSP00000216294	0	0	0	0	0	0	0.6	0.592	0.829
POLR3H	TBP	9606.ENSP00000347345	9606.ENSP00000375942	0	0	0	0	0	0.389	0.6	0.245	0.799
SNAPC1	TBP	9606.ENSP00000216294	9606.ENSP00000375942	0	0	0	0	0	0.371	0.6	0.615	0.894
C4A	C4BPB	9606.ENSP00000396688	9606.ENSP00000243611	0	0	0	0	0	0	0.8	0.643	0.925
C4A	C4BPA	9606.ENSP00000396688	9606.ENSP00000356037	0	0	0	0	0	0.213	0.8	0.831	0.971
C4A	PROS1	9606.ENSP00000396688	9606.ENSP00000377783	0	0	0	0	0	0	0	0.899	0.899
C4A	CFI	9606.ENSP00000396688	9606.ENSP00000378130	0	0	0	0	0	0.134	0.6	0.715	0.892
C4A	C4B	9606.ENSP00000396688	9606.ENSP00000415941	0	0	0	0.988	0	0.27	0.8	0.988	0.849
C4B	C4BPB	9606.ENSP00000415941	9606.ENSP00000243611	0	0	0	0	0	0	0.8	0.728	0.943
C4B	C4BPA	9606.ENSP00000415941	9606.ENSP00000356037	0	0	0	0	0	0.213	0.8	0.724	0.952
C4B	CD40	9606.ENSP00000415941	9606.ENSP00000361359	0	0	0	0	0	0	0	0.97	0.97
C4B	PROS1	9606.ENSP00000415941	9606.ENSP00000377783	0	0	0	0	0	0	0	0.977	0.977
C4B	CFI	9606.ENSP00000415941	9606.ENSP00000378130	0	0	0	0	0	0.134	0.6	0.715	0.892
C4BPA	NFKBIA	9606.ENSP00000356037	9606.ENSP00000216797	0	0	0	0	0	0	0.9	0	0.9
C4BPA	NFKB1	9606.ENSP00000356037	9606.ENSP00000226574	0	0	0	0	0	0	0.9	0.045	0.9
C4BPA	C4BPB	9606.ENSP00000356037	9606.ENSP00000243611	0	0	0	0.642	0	0	0.8	0.786	0.855
C4BPA	PRH2	9606.ENSP00000356037	9606.ENSP00000379682	0	0	0	0	0	0	0	0.764	0.764
C4BPA	CFI	9606.ENSP00000356037	9606.ENSP00000378130	0	0	0	0	0	0	0.6	0.453	0.771
C4BPA	RELA	9606.ENSP00000356037	9606.ENSP00000384273	0	0	0	0	0	0	0.9	0.045	0.9
C4BPA	PROS1	9606.ENSP00000356037	9606.ENSP00000377783	0	0	0	0	0	0.213	0.6	0.779	0.924
C4BPA	CD40	9606.ENSP00000356037	9606.ENSP00000361359	0	0	0	0	0	0	0.9	0.669	0.965
C4BPB	CFI	9606.ENSP00000243611	9606.ENSP00000378130	0	0	0	0	0	0	0.6	0.431	0.762
C4BPB	PROS1	9606.ENSP00000243611	9606.ENSP00000377783	0	0	0	0	0	0.677	0.6	0.417	0.918
CD40	NFKBIA	9606.ENSP00000361359	9606.ENSP00000216797	0	0	0	0	0	0	0.9	0.761	0.975
CD40	NFKB1	9606.ENSP00000361359	9606.ENSP00000226574	0	0	0	0	0	0	0.9	0.465	0.944
CD40	RELA	9606.ENSP00000361359	9606.ENSP00000384273	0	0	0	0	0	0	0.9	0.989	0.998
NFKB1	NFKBIA	9606.ENSP00000226574	9606.ENSP00000216797	0	0	0	0.762	0	0.986	0.9	0.98	0.998
NFKB1	RELA	9606.ENSP00000226574	9606.ENSP00000384273	0	0	0	0.776	0	0.998	0.9	0.991	0.999
NFKBIA	RELA	9606.ENSP00000216797	9606.ENSP00000384273	0	0	0	0	0	0.998	0.9	0.989	0.999
CCHCR1	POLR2C	9606.ENSP00000379566	9606.ENSP00000219252	0	0	0	0	0	0.27	0	0.668	0.747
CCHCR1	ZNF57	9606.ENSP00000379566	9606.ENSP00000303696	0	0	0	0	0	0.062	0	0.707	0.714
CCHCR1	TCF19	9606.ENSP00000379566	9606.ENSP00000365433	0	0	0	0	0	0	0	0.814	0.814
CCHCR1	CDSN	9606.ENSP00000379566	9606.ENSP00000365465	0	0	0	0	0	0.065	0	0.741	0.747
TCF19	ZNF57	9606.ENSP00000365433	9606.ENSP00000303696	0	0	0	0	0	0	0	0.708	0.708
ACKR4	CCR9	9606.ENSP00000249887	9606.ENSP00000350256	0	0	0	0.877	0	0	0.8	0.484	0.811
ACKR4	CCL25	9606.ENSP00000249887	9606.ENSP00000375086	0	0	0	0	0	0.281	0.8	0.609	0.939
ACKR4	CCL21	9606.ENSP00000249887	9606.ENSP00000259607	0	0	0	0	0	0.281	0.8	0.697	0.952
ACKR4	CCL19	9606.ENSP00000249887	9606.ENSP00000308815	0	0	0	0	0	0.27	0.8	0.729	0.956
CCL19	CCL21	9606.ENSP00000308815	9606.ENSP00000259607	0	0	0	0.844	0	0	0.8	0.915	0.828
CCL19	CXCL13	9606.ENSP00000308815	9606.ENSP00000286758	0	0	0	0	0	0.213	0	0.898	0.916
CCL19	CCL25	9606.ENSP00000308815	9606.ENSP00000375086	0	0	0	0	0	0	0	0.719	0.719
CCL19	CXCL12	9606.ENSP00000308815	9606.ENSP00000379140	0	0	0	0	0	0	0	0.783	0.783
CCL19	CCR9	9606.ENSP00000308815	9606.ENSP00000350256	0	0	0	0	0	0	0.6	0.595	0.831
CCL19	CCL20	9606.ENSP00000308815	9606.ENSP00000351671	0	0	0	0	0	0	0.6	0.718	0.882
CCL20	CCR9	9606.ENSP00000351671	9606.ENSP00000350256	0	0	0	0	0	0	0.6	0.52	0.8
CCL20	CXCL12	9606.ENSP00000351671	9606.ENSP00000379140	0	0	0	0	0	0.195	0	0.686	0.737
CCL20	CCL5	9606.ENSP00000351671	9606.ENSP00000474412	0	0	0	0	0	0.284	0.6	0.77	0.928
CCL21	MADCAM1	9606.ENSP00000259607	9606.ENSP00000215637	0	0	0	0	0	0	0	0.8	0.8
CCL21	CCL25	9606.ENSP00000259607	9606.ENSP00000375086	0	0	0	0	0	0	0	0.72	0.72
CCL21	CCL5	9606.ENSP00000259607	9606.ENSP00000474412	0	0	0	0	0	0.237	0	0.681	0.746
CCL21	CCR9	9606.ENSP00000259607	9606.ENSP00000350256	0	0	0	0	0	0.056	0.6	0.563	0.82
CCL21	CXCL12	9606.ENSP00000259607	9606.ENSP00000379140	0	0	0	0	0	0.237	0	0.835	0.869
CCL21	CXCL13	9606.ENSP00000259607	9606.ENSP00000286758	0	0	0	0	0	0.213	0	0.847	0.874
CCL25	MADCAM1	9606.ENSP00000375086	9606.ENSP00000215637	0	0	0	0	0	0	0	0.753	0.753
CCL25	CCR9	9606.ENSP00000375086	9606.ENSP00000350256	0	0	0	0	0	0.476	0.8	0.989	0.998
CCL25	CXCL12	9606.ENSP00000375086	9606.ENSP00000379140	0	0	0	0	0	0.272	0	0.687	0.762
CCL28	CCR9	9606.ENSP00000354416	9606.ENSP00000350256	0	0	0	0	0	0	0.6	0.61	0.837
CCL5	CCR9	9606.ENSP00000474412	9606.ENSP00000350256	0	0	0	0	0	0.056	0.6	0.502	0.795
CCL5	CXCL12	9606.ENSP00000474412	9606.ENSP00000379140	0	0	0	0	0	0.237	0	0.805	0.844
CCR9	MADCAM1	9606.ENSP00000350256	9606.ENSP00000215637	0	0	0	0	0	0	0	0.85	0.85
CCR9	CXCL13	9606.ENSP00000350256	9606.ENSP00000286758	0	0	0	0	0	0	0.6	0.476	0.781
CCR9	CXCL12	9606.ENSP00000350256	9606.ENSP00000379140	0	0	0	0	0	0.076	0.6	0.61	0.843
CXCL12	CXCL13	9606.ENSP00000379140	9606.ENSP00000286758	0	0	0	0	0	0	0	0.792	0.792
C2	C3	9606.ENSP00000299367	9606.ENSP00000245907	0	0	0	0	0	0.296	0.8	0.762	0.963
C2	CD55	9606.ENSP00000299367	9606.ENSP00000356030	0	0	0	0	0	0.229	0.6	0.564	0.853
C2	C4A	9606.ENSP00000299367	9606.ENSP00000396688	0	0	0	0	0	0.134	0.8	0.709	0.945
C2	C4B	9606.ENSP00000299367	9606.ENSP00000415941	0	0	0	0	0	0.535	0.8	0.654	0.965
C3	CD59	9606.ENSP00000245907	9606.ENSP00000379191	0	0	0	0	0	0	0	0.739	0.739
C3	C4A	9606.ENSP00000245907	9606.ENSP00000396688	0	0	0	0.749	0	0	0.8	0.99	0.849
C3	C4B	9606.ENSP00000245907	9606.ENSP00000415941	0	0	0	0.751	0	0	0.8	0.99	0.849
C3	CD55	9606.ENSP00000245907	9606.ENSP00000356030	0	0	0	0	0	0.8	0.6	0.977	0.997
C4A	CD55	9606.ENSP00000396688	9606.ENSP00000356030	0	0	0	0	0	0	0.6	0.846	0.935
C4A	C4B	9606.ENSP00000396688	9606.ENSP00000415941	0	0	0	0.988	0	0.27	0.8	0.988	0.849
C4B	CD55	9606.ENSP00000415941	9606.ENSP00000356030	0	0	0	0	0	0	0.6	0.74	0.891
CD55	CD97	9606.ENSP00000356030	9606.ENSP00000242786	0	0	0	0	0	0.213	0.8	0.989	0.998
CD55	ICAM1	9606.ENSP00000356030	9606.ENSP00000264832	0	0	0	0	0	0	0	0.803	0.803
CD55	EGF	9606.ENSP00000356030	9606.ENSP00000265171	0	0	0	0	0	0	0	0.923	0.923
CD55	EMR2	9606.ENSP00000356030	9606.ENSP00000319883	0	0	0	0	0	0	0	0.878	0.878
CD55	PIGA	9606.ENSP00000356030	9606.ENSP00000369820	0	0	0	0	0	0	0	0.83	0.83
CD55	CD59	9606.ENSP00000356030	9606.ENSP00000379191	0	0	0	0	0	0	0.5	0.915	0.955
CD59	PIGA	9606.ENSP00000379191	9606.ENSP00000369820	0	0	0	0	0	0	0	0.86	0.86
ADM	CFH	9606.ENSP00000436607	9606.ENSP00000356399	0	0	0	0	0	0.213	0	0.975	0.979
ARMS2	C3	9606.ENSP00000436682	9606.ENSP00000245907	0	0	0	0	0	0.297	0	0.662	0.752
ARMS2	CFH	9606.ENSP00000436682	9606.ENSP00000356399	0	0	0	0	0	0	0	0.916	0.916
ARMS2	CFB	9606.ENSP00000436682	9606.ENSP00000416561	0	0	0	0	0	0	0	0.844	0.844
C3	PTX3	9606.ENSP00000245907	9606.ENSP00000295927	0	0	0	0	0	0.486	0	0.626	0.799
C3	CRP	9606.ENSP00000245907	9606.ENSP00000255030	0	0	0	0	0	0.486	0	0.897	0.944
C3	CFHR3	9606.ENSP00000245907	9606.ENSP00000356395	0	0	0	0	0	0.27	0.6	0.936	0.979
C3	ITGAM	9606.ENSP00000245907	9606.ENSP00000441691	0	0	0	0	0	0.835	0.9	0.772	0.995
C3	CFHR1	9606.ENSP00000245907	9606.ENSP00000314299	0	0	0	0	0	0.973	0.6	0.955	0.999
C3	CFI	9606.ENSP00000245907	9606.ENSP00000378130	0	0	0	0	0	0.974	0.8	0.971	0.999
C3	CFH	9606.ENSP00000245907	9606.ENSP00000356399	0	0	0	0	0	0.982	0.8	0.989	0.999
C3	CFB	9606.ENSP00000245907	9606.ENSP00000416561	0	0	0	0	0	0.977	0.8	0.989	0.999
CFB	CFHR1	9606.ENSP00000416561	9606.ENSP00000314299	0	0	0	0	0	0.297	0	0.756	0.821
CFB	CFHR3	9606.ENSP00000416561	9606.ENSP00000356395	0	0	0	0	0	0	0.6	0.732	0.888
CFB	CFH	9606.ENSP00000416561	9606.ENSP00000356399	0	0	0	0.543	0	0.297	0.8	0.884	0.912
CFB	CFI	9606.ENSP00000416561	9606.ENSP00000378130	0	0	0	0	0	0	0.65	0.833	0.939
CFH	CRP	9606.ENSP00000356399	9606.ENSP00000255030	0	0	0	0	0	0.905	0	0.989	0.998
CFH	PTX3	9606.ENSP00000356399	9606.ENSP00000295927	0	0	0	0	0	0.877	0	0.963	0.995
CFH	CFHR1	9606.ENSP00000356399	9606.ENSP00000314299	0	0	0	0.96	0	0.932	0	0.874	0.934
CFH	CFHR3	9606.ENSP00000356399	9606.ENSP00000356395	0	0	0	0.946	0	0.229	0.9	0.87	0.923
CFH	ITGAM	9606.ENSP00000356399	9606.ENSP00000441691	0	0	0	0	0	0.213	0	0.925	0.938
CFH	CFI	9606.ENSP00000356399	9606.ENSP00000378130	0	0	0	0	0	0.87	0.6	0.93	0.996
CFHR1	CRP	9606.ENSP00000314299	9606.ENSP00000255030	0	0	0	0	0	0.297	0	0.632	0.73
CFHR1	PTX3	9606.ENSP00000314299	9606.ENSP00000295927	0	0	0	0	0	0.486	0	0.828	0.907
CFHR1	CFI	9606.ENSP00000314299	9606.ENSP00000378130	0	0	0	0	0	0	0	0.708	0.708
CFHR3	CFI	9606.ENSP00000356395	9606.ENSP00000378130	0	0	0	0	0	0	0.6	0.681	0.866
CALD1	SMTN	9606.ENSP00000354826	9606.ENSP00000484398	0	0	0	0	0	0	0	0.71	0.71
CALD1	CNN3	9606.ENSP00000354826	9606.ENSP00000359225	0	0	0	0	0	0	0	0.727	0.727
CNN3	SMTN	9606.ENSP00000359225	9606.ENSP00000484398	0	0	0	0	0	0.167	0	0.684	0.726
C1R	FCN3	9606.ENSP00000438615	9606.ENSP00000270879	0	0	0	0	0	0.056	0.5	0.652	0.821
C1R	C2	9606.ENSP00000438615	9606.ENSP00000299367	0	0	0	0	0	0	0.9	0.511	0.949
C1R	C1S	9606.ENSP00000438615	9606.ENSP00000385035	0	0	0	0.879	0	0.972	0.9	0.991	0.997
C1R	C4A	9606.ENSP00000438615	9606.ENSP00000396688	0	0	0	0	0	0.134	0.9	0.829	0.983
C1R	COLEC11	9606.ENSP00000438615	9606.ENSP00000411770	0	0	0	0	0	0	0.5	0.603	0.793
C1R	C4B	9606.ENSP00000438615	9606.ENSP00000415941	0	0	0	0	0	0.134	0.9	0.853	0.986
C1S	FCN3	9606.ENSP00000385035	9606.ENSP00000270879	0	0	0	0	0	0.056	0.5	0.653	0.821
C1S	C2	9606.ENSP00000385035	9606.ENSP00000299367	0	0	0	0.555	0	0	0.9	0.572	0.924
C1S	COLEC11	9606.ENSP00000385035	9606.ENSP00000411770	0	0	0	0	0	0	0.5	0.601	0.791
C1S	C4A	9606.ENSP00000385035	9606.ENSP00000396688	0	0	0	0	0	0.134	0.9	0.902	0.99
C1S	C4B	9606.ENSP00000385035	9606.ENSP00000415941	0	0	0	0	0	0.134	0.9	0.927	0.993
C2	FCN3	9606.ENSP00000299367	9606.ENSP00000270879	0	0	0	0	0	0.056	0.9	0.321	0.93
C2	MASP1	9606.ENSP00000299367	9606.ENSP00000296280	0	0	0	0.544	0	0.213	0.9	0.453	0.934
C2	COLEC10	9606.ENSP00000299367	9606.ENSP00000332723	0	0	0	0	0	0	0.9	0.101	0.906
C2	COLEC11	9606.ENSP00000299367	9606.ENSP00000411770	0	0	0	0	0	0	0.9	0.196	0.916
C2	MASP2	9606.ENSP00000299367	9606.ENSP00000383690	0	0	0	0.553	0	0	0.9	0.463	0.919
C2	C4A	9606.ENSP00000299367	9606.ENSP00000396688	0	0	0	0	0	0.134	0.8	0.709	0.945
C2	C4B	9606.ENSP00000299367	9606.ENSP00000415941	0	0	0	0	0	0.535	0.8	0.654	0.965
C4A	FCN3	9606.ENSP00000396688	9606.ENSP00000270879	0	0	0	0	0	0	0.9	0.612	0.959
C4A	MASP1	9606.ENSP00000396688	9606.ENSP00000296280	0	0	0	0	0	0.255	0.9	0.684	0.974
C4A	COLEC10	9606.ENSP00000396688	9606.ENSP00000332723	0	0	0	0	0	0	0.9	0.297	0.926
C4A	MASP2	9606.ENSP00000396688	9606.ENSP00000383690	0	0	0	0	0	0.654	0.9	0.749	0.99
C4A	COLEC11	9606.ENSP00000396688	9606.ENSP00000411770	0	0	0	0	0	0	0.9	0.527	0.95
C4A	C4B	9606.ENSP00000396688	9606.ENSP00000415941	0	0	0	0.988	0	0.27	0.8	0.988	0.849
C4B	FCN3	9606.ENSP00000415941	9606.ENSP00000270879	0	0	0	0	0	0	0.9	0.61	0.959
C4B	MASP1	9606.ENSP00000415941	9606.ENSP00000296280	0	0	0	0	0	0.388	0.9	0.862	0.99
C4B	COLEC10	9606.ENSP00000415941	9606.ENSP00000332723	0	0	0	0	0	0	0.9	0.294	0.926
C4B	MASP2	9606.ENSP00000415941	9606.ENSP00000383690	0	0	0	0	0	0.526	0.9	0.707	0.984
C4B	COLEC11	9606.ENSP00000415941	9606.ENSP00000411770	0	0	0	0	0	0	0.9	0.528	0.95
COLEC10	FCN3	9606.ENSP00000332723	9606.ENSP00000270879	0	0	0	0	0	0.158	0.5	0.681	0.853
COLEC10	MASP1	9606.ENSP00000332723	9606.ENSP00000296280	0	0	0	0	0	0	0.5	0.71	0.848
COLEC10	COLEC11	9606.ENSP00000332723	9606.ENSP00000411770	0	0	0	0.937	0	0	0.8	0.979	0.812
COLEC10	MASP2	9606.ENSP00000332723	9606.ENSP00000383690	0	0	0	0	0	0	0.5	0.747	0.868
COLEC11	FCN3	9606.ENSP00000411770	9606.ENSP00000270879	0	0	0	0	0	0.158	0.5	0.733	0.877
COLEC11	MASP1	9606.ENSP00000411770	9606.ENSP00000296280	0	0	0	0	0	0	0.5	0.927	0.961
COLEC11	TSSC1	9606.ENSP00000411770	9606.ENSP00000371559	0	0	0	0	0	0	0	0.706	0.706
COLEC11	MASP2	9606.ENSP00000411770	9606.ENSP00000383690	0	0	0	0	0	0	0.5	0.858	0.925
FCN3	MASP2	9606.ENSP00000270879	9606.ENSP00000383690	0	0	0	0	0	0.056	0.5	0.951	0.974
FCN3	MASP1	9606.ENSP00000270879	9606.ENSP00000296280	0	0	0	0	0	0.056	0.5	0.961	0.979
MASP1	MASP2	9606.ENSP00000296280	9606.ENSP00000383690	0	0	0	0.923	0	0.27	0.9	0.99	0.929
CCL20	CXCL10	9606.ENSP00000351671	9606.ENSP00000305651	0	0	0	0	0	0	0.6	0.764	0.901
CCL20	CXCL12	9606.ENSP00000351671	9606.ENSP00000379140	0	0	0	0	0	0.195	0	0.686	0.737
CCL20	CXCL9	9606.ENSP00000351671	9606.ENSP00000354901	0	0	0	0	0	0	0	0.725	0.725
CCL20	CXCR6	9606.ENSP00000351671	9606.ENSP00000395704	0	0	0	0	0	0	0.6	0.618	0.84
CCL20	CCL4	9606.ENSP00000351671	9606.ENSP00000482259	0	0	0	0	0	0	0.6	0.723	0.884
CCL20	CCL5	9606.ENSP00000351671	9606.ENSP00000474412	0	0	0	0	0	0.284	0.6	0.77	0.928
CCL20	CCL3	9606.ENSP00000351671	9606.ENSP00000477908	0	0	0	0	0	0	0.9	0.766	0.975
CCL27	CXCR6	9606.ENSP00000259631	9606.ENSP00000395704	0	0	0	0	0	0	0.6	0.517	0.798
CCL3	CXCL10	9606.ENSP00000477908	9606.ENSP00000305651	0	0	0	0	0	0	0.9	0.906	0.99
CCL3	CXCL9	9606.ENSP00000477908	9606.ENSP00000354901	0	0	0	0	0	0	0	0.87	0.87
CCL3	CXCL12	9606.ENSP00000477908	9606.ENSP00000379140	0	0	0	0	0	0	0	0.74	0.74
CCL3	CXCR6	9606.ENSP00000477908	9606.ENSP00000395704	0	0	0	0	0	0	0.6	0.528	0.803
CCL3	CCL5	9606.ENSP00000477908	9606.ENSP00000474412	0	0	0	0.94	0	0	0.9	0.937	0.905
CCL3	CCL4	9606.ENSP00000477908	9606.ENSP00000482259	0	0	0	0.954	0	0.27	0.9	0.943	0.927
CCL4	CXCL10	9606.ENSP00000482259	9606.ENSP00000305651	0	0	0	0	0	0	0.6	0.893	0.955
CCL4	CXCL9	9606.ENSP00000482259	9606.ENSP00000354901	0	0	0	0	0	0	0	0.855	0.855
CCL4	CXCL12	9606.ENSP00000482259	9606.ENSP00000379140	0	0	0	0	0	0	0.9	0.689	0.967
CCL4	CXCR6	9606.ENSP00000482259	9606.ENSP00000395704	0	0	0	0	0	0	0.6	0.551	0.812
CCL5	CXCL10	9606.ENSP00000474412	9606.ENSP00000305651	0	0	0	0	0	0.248	0.6	0.908	0.97
CCL5	CXCL9	9606.ENSP00000474412	9606.ENSP00000354901	0	0	0	0	0	0.248	0	0.861	0.891
CCL5	CXCL12	9606.ENSP00000474412	9606.ENSP00000379140	0	0	0	0	0	0.237	0	0.805	0.844
CCL5	CXCR6	9606.ENSP00000474412	9606.ENSP00000395704	0	0	0	0	0	0	0.6	0.594	0.83
CXCL10	CXCL12	9606.ENSP00000305651	9606.ENSP00000379140	0	0	0	0	0	0.237	0	0.739	0.792
CXCL10	CXCR6	9606.ENSP00000305651	9606.ENSP00000395704	0	0	0	0	0	0	0.6	0.557	0.815
CXCL10	CXCL9	9606.ENSP00000305651	9606.ENSP00000354901	0	0	0	0.862	0	0.272	0.9	0.918	0.933
CXCL12	CXCL9	9606.ENSP00000379140	9606.ENSP00000354901	0	0	0	0	0	0.237	0	0.859	0.887
CXCL12	CXCR6	9606.ENSP00000379140	9606.ENSP00000395704	0	0	0	0	0	0	0.6	0.65	0.854
CXCL16	CXCR6	9606.ENSP00000293778	9606.ENSP00000395704	0	0	0	0	0	0.213	0.8	0.989	0.998
CXCL9	CXCR6	9606.ENSP00000354901	9606.ENSP00000395704	0	0	0	0	0	0	0.6	0.561	0.817
CXCR6	FYCO1	9606.ENSP00000395704	9606.ENSP00000296137	0	0	0	0	0	0	0	0.823	0.823
CA1	CYP24A1	9606.ENSP00000430656	9606.ENSP00000216862	0	0	0	0	0	0	0	0.87	0.87
CA13	CYP24A1	9606.ENSP00000318912	9606.ENSP00000216862	0	0	0	0	0	0	0	0.871	0.871
CA14	CYP24A1	9606.ENSP00000358107	9606.ENSP00000216862	0	0	0	0	0	0	0	0.87	0.87
CA5A	CYP24A1	9606.ENSP00000309649	9606.ENSP00000216862	0	0	0	0	0	0	0	0.87	0.87
CA5B	CYP24A1	9606.ENSP00000314099	9606.ENSP00000216862	0	0	0	0	0	0	0	0.874	0.874
CA7	CYP24A1	9606.ENSP00000345659	9606.ENSP00000216862	0	0	0	0	0	0	0	0.87	0.87
CA8	CYP24A1	9606.ENSP00000314407	9606.ENSP00000216862	0	0	0	0	0	0	0	0.868	0.868
CYP24A1	VDR	9606.ENSP00000216862	9606.ENSP00000447173	0	0	0	0	0	0.345	0	0.884	0.921
CYP24A1	CYP27B1	9606.ENSP00000216862	9606.ENSP00000228606	0	0	0	0.814	0	0	0.9	0.95	0.917
CYP24A1	CYP2R1	9606.ENSP00000216862	9606.ENSP00000334592	0	0	0	0.602	0	0.142	0.9	0.911	0.942
CYP27B1	CYP2R1	9606.ENSP00000228606	9606.ENSP00000334592	0	0	0	0.607	0	0.43	0.9	0.94	0.962
CYP27B1	VDR	9606.ENSP00000228606	9606.ENSP00000447173	0	0	0	0	0	0.097	0	0.994	0.994
CYP2R1	VDR	9606.ENSP00000334592	9606.ENSP00000447173	0	0	0	0	0	0.073	0	0.847	0.852
DLX3	MEIS1	9606.ENSP00000389870	9606.ENSP00000272369	0	0	0	0	0	0.812	0	0.351	0.873
DLX3	SMAD6	9606.ENSP00000389870	9606.ENSP00000288840	0	0	0	0	0	0.057	0	0.705	0.709
DLX3	KLK4	9606.ENSP00000389870	9606.ENSP00000326159	0	0	0	0	0	0	0	0.769	0.769
DLX3	RUNX2	9606.ENSP00000389870	9606.ENSP00000360493	0	0	0	0	0	0.057	0	0.77	0.773
DLX3	FAM83H	9606.ENSP00000389870	9606.ENSP00000373565	0	0	0	0	0	0	0	0.795	0.795
DLX3	WDR72	9606.ENSP00000389870	9606.ENSP00000379619	0	0	0	0	0	0	0	0.798	0.798
DLX3	MEIS2	9606.ENSP00000389870	9606.ENSP00000453793	0	0	0	0	0	0.812	0	0.27	0.857
FAM83H	KLK4	9606.ENSP00000373565	9606.ENSP00000326159	0	0	0	0	0	0	0	0.712	0.712
FAM83H	WDR72	9606.ENSP00000373565	9606.ENSP00000379619	0	0	0	0	0	0	0	0.886	0.886
KLK4	WDR72	9606.ENSP00000326159	9606.ENSP00000379619	0	0	0	0	0	0	0	0.77	0.77
MEIS1	MEIS2	9606.ENSP00000272369	9606.ENSP00000453793	0	0	0	0.979	0	0.973	0	0.785	0.973
RUNX2	SMAD6	9606.ENSP00000360493	9606.ENSP00000288840	0	0	0	0	0	0.345	0.9	0.914	0.993
DPP7	DPP9	9606.ENSP00000360635	9606.ENSP00000262960	0	0	0	0	0	0	0	0.861	0.861
DPP7	PREP	9606.ENSP00000360635	9606.ENSP00000358106	0	0	0	0	0	0	0	0.729	0.729
DPP9	NLRP1	9606.ENSP00000262960	9606.ENSP00000478516	0	0	0	0	0	0	0	0.769	0.769
DPP9	TFDP3	9606.ENSP00000262960	9606.ENSP00000385461	0	0	0	0	0	0	0	0.765	0.765
DPP9	PREP	9606.ENSP00000262960	9606.ENSP00000358106	0	0	0	0	0	0	0	0.825	0.825
DPP9	SUMO1	9606.ENSP00000262960	9606.ENSP00000376077	0	0	0	0	0	0.143	0	0.866	0.88
EPCAM	ERAP2	9606.ENSP00000263735	9606.ENSP00000400376	0	0	0	0	0	0	0	0.705	0.705
ERAP2	LAMP1	9606.ENSP00000400376	9606.ENSP00000333298	0	0	0	0	0	0	0	0.821	0.821
ERAP2	TPP2	9606.ENSP00000400376	9606.ENSP00000365233	0	0	0	0	0	0	0	0.772	0.772
EGF	F2	9606.ENSP00000265171	9606.ENSP00000308541	0	0	0	0	0	0.056	0	0.747	0.751
EGF	F3	9606.ENSP00000265171	9606.ENSP00000334145	0	0	0	0	0	0	0	0.966	0.966
EGR1	F3	9606.ENSP00000239938	9606.ENSP00000334145	0	0	0	0	0	0	0.9	0.517	0.949
F10	F9	9606.ENSP00000364709	9606.ENSP00000218099	0	0	0	0.917	0	0	0.9	0.875	0.907
F10	TFPI	9606.ENSP00000364709	9606.ENSP00000233156	0	0	0	0	0	0.519	0.8	0.93	0.992
F10	F2	9606.ENSP00000364709	9606.ENSP00000308541	0	0	0	0.763	0	0	0.9	0.979	0.923
F10	F3	9606.ENSP00000364709	9606.ENSP00000334145	0	0	0	0	0	0.213	0.6	0.988	0.995
F10	SERPINC1	9606.ENSP00000364709	9606.ENSP00000356671	0	0	0	0	0	0.816	0.9	0.987	0.999
F10	F5	9606.ENSP00000364709	9606.ENSP00000356771	0	0	0	0	0	0.292	0.6	0.803	0.939
F10	F7	9606.ENSP00000364709	9606.ENSP00000364731	0	0	0	0.897	0	0.27	0.8	0.927	0.862
F2	F9	9606.ENSP00000308541	9606.ENSP00000218099	0	0	0	0.727	0	0.213	0.65	0.914	0.784
F2	TFPI	9606.ENSP00000308541	9606.ENSP00000233156	0	0	0	0	0	0.143	0	0.708	0.739
F2	F5	9606.ENSP00000308541	9606.ENSP00000356771	0	0	0	0	0	0.478	0.9	0.805	0.988
F2	F3	9606.ENSP00000308541	9606.ENSP00000334145	0	0	0	0	0	0	0.9	0.921	0.991
F2	SERPINC1	9606.ENSP00000308541	9606.ENSP00000356671	0	0	0	0	0	0.937	0.9	0.968	0.999
F3	F9	9606.ENSP00000334145	9606.ENSP00000218099	0	0	0	0	0	0	0.9	0.982	0.998
F3	TFPI	9606.ENSP00000334145	9606.ENSP00000233156	0	0	0	0	0	0	0.6	0.972	0.988
F3	PLG	9606.ENSP00000334145	9606.ENSP00000308938	0	0	0	0	0	0.27	0	0.876	0.905
F3	F5	9606.ENSP00000334145	9606.ENSP00000356771	0	0	0	0	0	0	0.9	0.602	0.958
F3	SERPINC1	9606.ENSP00000334145	9606.ENSP00000356671	0	0	0	0	0	0	0	0.968	0.968
F3	F7	9606.ENSP00000334145	9606.ENSP00000364731	0	0	0	0	0	0.978	0.9	0.99	0.999
F5	SERPINC1	9606.ENSP00000356771	9606.ENSP00000356671	0	0	0	0	0	0.113	0.9	0.686	0.969
F7	F9	9606.ENSP00000364731	9606.ENSP00000218099	0	0	0	0.897	0	0.213	0.9	0.917	0.925
F7	TFPI	9606.ENSP00000364731	9606.ENSP00000233156	0	0	0	0	0	0.143	0.9	0.777	0.979
F7	SERPINC1	9606.ENSP00000364731	9606.ENSP00000356671	0	0	0	0	0	0.12	0	0.978	0.979
F9	SERPINC1	9606.ENSP00000218099	9606.ENSP00000356671	0	0	0	0	0	0.933	0.9	0.947	0.999
PLG	SERPINC1	9606.ENSP00000308938	9606.ENSP00000356671	0	0	0	0	0	0.391	0	0.917	0.947
SERPINC1	TFPI	9606.ENSP00000356671	9606.ENSP00000233156	0	0	0	0	0	0.102	0	0.859	0.868
FOXP2	SRPX2	9606.ENSP00000386200	9606.ENSP00000362095	0	0	0	0	0	0	0	0.704	0.704
FOXP2	FOXP4	9606.ENSP00000386200	9606.ENSP00000362151	0	0	0	0.954	0	0.873	0	0.926	0.878
FOXP2	FOXP3	9606.ENSP00000386200	9606.ENSP00000365380	0	0	0	0.82	0	0.68	0	0.661	0.717
FOXP3	FOXP4	9606.ENSP00000365380	9606.ENSP00000362151	0	0	0	0.813	0	0.696	0	0.484	0.722
FOXP4	HAND1	9606.ENSP00000362151	9606.ENSP00000231121	0	0	0	0	0	0.076	0	0.92	0.922
FOXP4	HAND2	9606.ENSP00000362151	9606.ENSP00000352565	0	0	0	0	0	0.076	0	0.739	0.748
FOXP4	SRPX2	9606.ENSP00000362151	9606.ENSP00000362095	0	0	0	0	0	0	0	0.732	0.732
HAND1	HAND2	9606.ENSP00000231121	9606.ENSP00000352565	0	0	0	0.922	0	0.463	0.9	0.819	0.947
ADAM17	NOTCH1	9606.ENSP00000309968	9606.ENSP00000277541	0	0	0	0	0	0.3	0.9	0.71	0.977
ADAM17	BACE1	9606.ENSP00000309968	9606.ENSP00000318585	0	0	0	0	0	0	0	0.774	0.774
ADAM17	FURIN	9606.ENSP00000309968	9606.ENSP00000483552	0	0	0	0	0	0	0.9	0.688	0.967
ANTXR1	ANTXR2	9606.ENSP00000301945	9606.ENSP00000306185	0	0	0	0.953	0	0	0.9	0.99	0.904
ANTXR1	FURIN	9606.ENSP00000301945	9606.ENSP00000483552	0	0	0	0	0	0	0.9	0.687	0.967
ANTXR2	FURIN	9606.ENSP00000306185	9606.ENSP00000483552	0	0	0	0	0	0	0.9	0.767	0.975
BACE1	FURIN	9606.ENSP00000318585	9606.ENSP00000483552	0	0	0	0	0	0.379	0.9	0.5	0.966
COL23A1	FURIN	9606.ENSP00000375069	9606.ENSP00000483552	0	0	0	0	0	0.287	0.9	0.54	0.964
FBN1	FURIN	9606.ENSP00000325527	9606.ENSP00000483552	0	0	0	0	0	0	0.9	0.476	0.945
FURIN	NOTCH1	9606.ENSP00000483552	9606.ENSP00000277541	0	0	0	0	0	0.213	0.9	0.745	0.978
FURIN	MMP14	9606.ENSP00000483552	9606.ENSP00000308208	0	0	0	0	0	0.675	0.9	0.858	0.995
FURIN	PACS1	9606.ENSP00000483552	9606.ENSP00000316454	0	0	0	0	0	0.462	0	0.969	0.982
FURIN	NGF	9606.ENSP00000483552	9606.ENSP00000358525	0	0	0	0	0	0.057	0.9	0.48	0.946
CCZ1B	RAB7A	9606.ENSP00000314544	9606.ENSP00000265062	0	0	0	0	0	0.388	0	0.869	0.916
CCZ1B	FYCO1	9606.ENSP00000314544	9606.ENSP00000296137	0	0	0	0	0	0.443	0	0.531	0.727
CCZ1B	RAB7B	9606.ENSP00000314544	9606.ENSP00000479762	0	0	0	0	0	0.288	0	0.853	0.89
CXCR6	FYCO1	9606.ENSP00000395704	9606.ENSP00000296137	0	0	0	0	0	0	0	0.823	0.823
FYCO1	GABARAPL2	9606.ENSP00000296137	9606.ENSP00000037243	0	0	0	0	0	0.358	0	0.703	0.801
FYCO1	RAB40AL	9606.ENSP00000296137	9606.ENSP00000218249	0	0	0	0	0	0	0	0.818	0.818
FYCO1	RAB7A	9606.ENSP00000296137	9606.ENSP00000265062	0	0	0	0	0	0	0.8	0.969	0.993
FYCO1	MAP1LC3B	9606.ENSP00000296137	9606.ENSP00000268607	0	0	0	0	0	0.871	0	0.739	0.965
FYCO1	SASS6	9606.ENSP00000296137	9606.ENSP00000287482	0	0	0	0	0	0.736	0	0	0.736
FYCO1	ZFYVE27	9606.ENSP00000296137	9606.ENSP00000377282	0	0	0	0	0	0	0	0.863	0.863
FYCO1	MAP1LC3A	9606.ENSP00000296137	9606.ENSP00000363970	0	0	0	0	0	0.747	0	0.827	0.954
FYCO1	RAB7B	9606.ENSP00000296137	9606.ENSP00000479762	0	0	0	0	0	0	0.8	0.988	0.997
GABARAPL2	RAB7B	9606.ENSP00000037243	9606.ENSP00000479762	0	0	0	0	0	0.072	0	0.692	0.702
GABARAPL2	RAB7A	9606.ENSP00000037243	9606.ENSP00000265062	0	0	0	0	0	0.108	0	0.783	0.799
GABARAPL2	MAP1LC3A	9606.ENSP00000037243	9606.ENSP00000363970	0	0	0	0.894	0	0.082	0.9	0.898	0.913
GABARAPL2	MAP1LC3B	9606.ENSP00000037243	9606.ENSP00000268607	0	0	0	0.891	0	0.32	0.9	0.922	0.936
MAP1LC3A	RAB7A	9606.ENSP00000363970	9606.ENSP00000265062	0	0	0	0	0	0.293	0	0.737	0.806
MAP1LC3A	MAP1LC3B	9606.ENSP00000363970	9606.ENSP00000268607	0	0	0	0.971	0	0.492	0.9	0.916	0.948
RAB7A	RAB7B	9606.ENSP00000265062	9606.ENSP00000479762	0	0	0	0.93	0	0	0.9	0.873	0.906
RAB7A	ZFYVE27	9606.ENSP00000265062	9606.ENSP00000377282	0	0	0	0	0	0.27	0	0.969	0.976
RAB7B	ZFYVE27	9606.ENSP00000479762	9606.ENSP00000377282	0	0	0	0	0	0	0	0.909	0.909
ACTA1	GC	9606.ENSP00000355645	9606.ENSP00000421725	0	0	0	0	0	0.802	0	0.122	0.818
CUBN	LRP2	9606.ENSP00000367064	9606.ENSP00000263816	0	0	0	0	0	0.287	0.9	0.992	0.999
CUBN	LGMN	9606.ENSP00000367064	9606.ENSP00000376911	0	0	0	0	0	0	0.9	0.161	0.912
CUBN	GC	9606.ENSP00000367064	9606.ENSP00000421725	0	0	0	0	0	0.27	0.8	0.897	0.983
CYP24A1	PTH	9606.ENSP00000216862	9606.ENSP00000282091	0	0	0	0	0	0	0	0.789	0.789
CYP24A1	GC	9606.ENSP00000216862	9606.ENSP00000421725	0	0	0	0	0	0	0	0.839	0.839
CYP24A1	VDR	9606.ENSP00000216862	9606.ENSP00000447173	0	0	0	0	0	0.345	0	0.884	0.921
CYP24A1	CYP27B1	9606.ENSP00000216862	9606.ENSP00000228606	0	0	0	0.814	0	0	0.9	0.95	0.917
CYP24A1	CYP2R1	9606.ENSP00000216862	9606.ENSP00000334592	0	0	0	0.602	0	0.142	0.9	0.911	0.942
CYP27B1	PTH	9606.ENSP00000228606	9606.ENSP00000282091	0	0	0	0	0	0	0	0.839	0.839
CYP27B1	GC	9606.ENSP00000228606	9606.ENSP00000421725	0	0	0	0	0	0	0	0.861	0.861
CYP27B1	CYP2R1	9606.ENSP00000228606	9606.ENSP00000334592	0	0	0	0.607	0	0.43	0.9	0.94	0.962
CYP27B1	VDR	9606.ENSP00000228606	9606.ENSP00000447173	0	0	0	0	0	0.097	0	0.994	0.994
CYP2R1	VDR	9606.ENSP00000334592	9606.ENSP00000447173	0	0	0	0	0	0.073	0	0.847	0.852
CYP2R1	GC	9606.ENSP00000334592	9606.ENSP00000421725	0	0	0	0	0	0	0	0.891	0.891
GC	LRP2	9606.ENSP00000421725	9606.ENSP00000263816	0	0	0	0	0	0.27	0.9	0.986	0.998
GC	PTH	9606.ENSP00000421725	9606.ENSP00000282091	0	0	0	0	0	0	0	0.804	0.804
GC	SLC25A18	9606.ENSP00000421725	9606.ENSP00000329033	0	0	0	0	0	0	0	0.806	0.806
GC	LGMN	9606.ENSP00000421725	9606.ENSP00000376911	0	0	0	0	0	0	0.9	0.085	0.904
GC	VDR	9606.ENSP00000421725	9606.ENSP00000447173	0	0	0	0	0	0.058	0	0.975	0.975
PTH	VDR	9606.ENSP00000282091	9606.ENSP00000447173	0	0	0	0	0	0	0	0.897	0.897
COG1	GOLGA3	9606.ENSP00000299886	9606.ENSP00000204726	0	0	0	0	0	0	0.9	0.062	0.902
COG1	COG3	9606.ENSP00000299886	9606.ENSP00000258654	0	0	0	0	0	0.92	0.9	0.978	0.999
COG1	COG5	9606.ENSP00000299886	9606.ENSP00000297135	0	0	0	0	0	0.97	0.9	0.991	0.999
COG1	COG2	9606.ENSP00000299886	9606.ENSP00000355629	0	0	0	0	0	0.884	0.9	0.982	0.999
COG1	COG4	9606.ENSP00000299886	9606.ENSP00000315775	0	0	0	0	0	0.88	0.9	0.983	0.999
COG1	COG6	9606.ENSP00000299886	9606.ENSP00000397441	0	0	0	0	0	0.882	0.9	0.933	0.999
COG1	COG8	9606.ENSP00000299886	9606.ENSP00000305459	0	0	0	0	0	0.952	0.9	0.994	0.999
COG1	COG7	9606.ENSP00000299886	9606.ENSP00000305442	0	0	0	0	0	0.884	0.9	0.958	0.999
COG2	GOLGA3	9606.ENSP00000355629	9606.ENSP00000204726	0	0	0	0	0	0	0.9	0.243	0.921
COG2	COG3	9606.ENSP00000355629	9606.ENSP00000258654	0	0	0	0	0	0.943	0.9	0.987	0.999
COG2	COG5	9606.ENSP00000355629	9606.ENSP00000297135	0	0	0	0	0	0.879	0.9	0.965	0.999
COG2	COG7	9606.ENSP00000355629	9606.ENSP00000305442	0	0	0	0	0	0.884	0.9	0.957	0.999
COG2	COG8	9606.ENSP00000355629	9606.ENSP00000305459	0	0	0	0	0	0.87	0.9	0.894	0.998
COG2	COG4	9606.ENSP00000355629	9606.ENSP00000315775	0	0	0	0	0	0.918	0.9	0.96	0.999
COG2	COG6	9606.ENSP00000355629	9606.ENSP00000397441	0	0	0	0	0	0.885	0.9	0.945	0.999
COG3	GOLGA3	9606.ENSP00000258654	9606.ENSP00000204726	0	0	0	0	0	0	0.9	0.47	0.944
COG3	COG8	9606.ENSP00000258654	9606.ENSP00000305459	0	0	0	0	0	0.94	0.9	0.922	0.999
COG3	COG4	9606.ENSP00000258654	9606.ENSP00000315775	0	0	0	0	0	0.976	0.9	0.984	0.999
COG3	COG6	9606.ENSP00000258654	9606.ENSP00000397441	0	0	0	0	0	0.97	0.9	0.9	0.999
COG3	COG7	9606.ENSP00000258654	9606.ENSP00000305442	0	0	0	0	0	0.909	0.9	0.964	0.999
COG3	COG5	9606.ENSP00000258654	9606.ENSP00000297135	0	0	0	0	0	0.897	0.9	0.972	0.999
COG4	GOLGA3	9606.ENSP00000315775	9606.ENSP00000204726	0	0	0	0	0	0	0.9	0.049	0.9
COG4	COG5	9606.ENSP00000315775	9606.ENSP00000297135	0	0	0	0	0	0.882	0.9	0.919	0.998
COG4	COG7	9606.ENSP00000315775	9606.ENSP00000305442	0	0	0	0	0	0.892	0.9	0.922	0.999
COG4	COG8	9606.ENSP00000315775	9606.ENSP00000305459	0	0	0	0	0	0.914	0.9	0.941	0.999
COG4	COG6	9606.ENSP00000315775	9606.ENSP00000397441	0	0	0	0	0	0.929	0.9	0.928	0.999
COG5	GOLGA3	9606.ENSP00000297135	9606.ENSP00000204726	0	0	0	0	0	0	0.9	0.049	0.9
COG5	COG7	9606.ENSP00000297135	9606.ENSP00000305442	0	0	0	0	0	0.897	0.9	0.992	0.999
COG5	COG8	9606.ENSP00000297135	9606.ENSP00000305459	0	0	0	0	0	0.952	0.9	0.983	0.999
COG5	COG6	9606.ENSP00000297135	9606.ENSP00000397441	0	0	0	0	0	0.87	0.9	0.949	0.999
COG6	GOLGA3	9606.ENSP00000397441	9606.ENSP00000204726	0	0	0	0	0	0	0.9	0.062	0.902
COG6	COG7	9606.ENSP00000397441	9606.ENSP00000305442	0	0	0	0	0	0.882	0.9	0.941	0.999
COG6	COG8	9606.ENSP00000397441	9606.ENSP00000305459	0	0	0	0	0	0.963	0.9	0.968	0.999
COG7	GOLGA3	9606.ENSP00000305442	9606.ENSP00000204726	0	0	0	0	0	0	0.9	0	0.9
COG7	COG8	9606.ENSP00000305442	9606.ENSP00000305459	0	0	0	0	0	0.749	0.9	0.94	0.998
COG8	GOLGA3	9606.ENSP00000305459	9606.ENSP00000204726	0	0	0	0	0	0	0.9	0.061	0.902
GOLGA3	TSNAX	9606.ENSP00000204726	9606.ENSP00000355599	0	0	0	0	0	0.692	0	0.795	0.934
GOLGA3	RAB28	9606.ENSP00000204726	9606.ENSP00000328551	0	0	0	0	0	0.941	0	0.105	0.944
AQP4	GRM5	9606.ENSP00000372654	9606.ENSP00000306138	0	0	0	0	0	0	0	0.934	0.934
CASR	GNAQ	9606.ENSP00000420194	9606.ENSP00000286548	0	0	0	0	0	0	0.8	0.928	0.985
CASR	GRM5	9606.ENSP00000420194	9606.ENSP00000306138	0	0	0	0.724	0	0.84	0.5	0.526	0.928
CASR	GRM1	9606.ENSP00000420194	9606.ENSP00000354896	0	0	0	0.713	0	0.955	0.5	0.663	0.98
DLG4	HOMER2	9606.ENSP00000382428	9606.ENSP00000305632	0	0	0	0	0	0.173	0.6	0.536	0.833
DLG4	GRM5	9606.ENSP00000382428	9606.ENSP00000306138	0	0	0	0	0	0.153	0.6	0.854	0.946
DLG4	HOMER1	9606.ENSP00000382428	9606.ENSP00000334382	0	0	0	0	0	0.149	0.6	0.935	0.976
DLG4	GRM1	9606.ENSP00000382428	9606.ENSP00000354896	0	0	0	0	0	0.153	0.6	0.568	0.841
ENSP00000480012	GRM5	9606.ENSP00000480012	9606.ENSP00000306138	0	0	0	0	0	0.119	0	0.984	0.985
ESR1	GNAQ	9606.ENSP00000405330	9606.ENSP00000286548	0	0	0	0	0	0.056	0.9	0.382	0.936
ESR1	GRM5	9606.ENSP00000405330	9606.ENSP00000306138	0	0	0	0	0	0	0	0.952	0.952
ESR1	GRM1	9606.ENSP00000405330	9606.ENSP00000354896	0	0	0	0	0	0	0	0.969	0.969
GNAQ	GRM1	9606.ENSP00000286548	9606.ENSP00000354896	0	0	0	0	0	0	0.8	0.975	0.994
GNAQ	GRM5	9606.ENSP00000286548	9606.ENSP00000306138	0	0	0	0	0	0	0.8	0.989	0.997
GRM1	HOMER2	9606.ENSP00000354896	9606.ENSP00000305632	0	0	0	0	0	0.371	0.8	0.763	0.967
GRM1	GRM5	9606.ENSP00000354896	9606.ENSP00000306138	0	0	0	0.961	0	0.787	0.8	0.963	0.957
GRM1	HOMER1	9606.ENSP00000354896	9606.ENSP00000334382	0	0	0	0	0	0.646	0.8	0.938	0.995
GRM5	HOMER2	9606.ENSP00000306138	9606.ENSP00000305632	0	0	0	0	0	0.234	0.6	0.811	0.937
GRM5	PRNP	9606.ENSP00000306138	9606.ENSP00000368752	0	0	0	0	0	0.361	0	0.975	0.983
GRM5	HOMER1	9606.ENSP00000306138	9606.ENSP00000334382	0	0	0	0	0	0.58	0.6	0.989	0.998
HOMER1	HOMER2	9606.ENSP00000334382	9606.ENSP00000305632	0	0	0	0.94	0	0.88	0.8	0.915	0.976
AGL	PYGM	9606.ENSP00000294724	9606.ENSP00000164139	0	0	0	0	0	0	0.9	0.783	0.977
AGL	PYGB	9606.ENSP00000294724	9606.ENSP00000216962	0	0	0	0	0	0	0.9	0.749	0.973
AGL	NHLRC1	9606.ENSP00000294724	9606.ENSP00000345464	0	0	0	0	0	0.27	0	0.785	0.836
AGL	GYS1	9606.ENSP00000294724	9606.ENSP00000317904	0	0	0	0	0	0.104	0	0.715	0.734
AGL	UGP2	9606.ENSP00000294724	9606.ENSP00000338703	0	0	0	0	0	0	0.9	0.585	0.956
AGL	GYG1	9606.ENSP00000294724	9606.ENSP00000340736	0	0	0	0	0	0	0.9	0.692	0.967
AGL	GBE1	9606.ENSP00000294724	9606.ENSP00000410833	0	0	0	0	0	0	0.9	0.867	0.986
GBE1	PYGM	9606.ENSP00000410833	9606.ENSP00000164139	0	0	0	0	0	0.272	0.9	0.708	0.976
GBE1	PYGB	9606.ENSP00000410833	9606.ENSP00000216962	0	0	0	0	0	0.272	0.9	0.706	0.976
GBE1	GYS2	9606.ENSP00000410833	9606.ENSP00000261195	0	0	0	0	0	0	0.9	0.808	0.98
GBE1	GYS1	9606.ENSP00000410833	9606.ENSP00000317904	0	0	0	0	0	0.684	0.9	0.849	0.994
GBE1	UGP2	9606.ENSP00000410833	9606.ENSP00000338703	0	0	0	0	0	0	0	0.844	0.844
GBE1	GYG1	9606.ENSP00000410833	9606.ENSP00000340736	0	0	0	0	0	0.676	0.9	0.809	0.993
GYG1	PYGM	9606.ENSP00000340736	9606.ENSP00000164139	0	0	0	0	0	0.056	0.9	0.526	0.951
GYG1	PYGB	9606.ENSP00000340736	9606.ENSP00000216962	0	0	0	0	0	0.056	0.9	0.535	0.952
GYG1	PPP1R3C	9606.ENSP00000340736	9606.ENSP00000238994	0	0	0	0	0	0.768	0.8	0.542	0.976
GYG1	GYS2	9606.ENSP00000340736	9606.ENSP00000261195	0	0	0	0	0	0.693	0.8	0.676	0.978
GYG1	TRIM7	9606.ENSP00000340736	9606.ENSP00000274773	0	0	0	0	0	0.486	0	0.909	0.951
GYG1	GYS1	9606.ENSP00000340736	9606.ENSP00000317904	0	0	0	0	0	0.916	0.8	0.813	0.996
GYG1	UGP2	9606.ENSP00000340736	9606.ENSP00000338703	0	0	0	0	0	0	0.9	0.618	0.96
GYG1	NHLRC1	9606.ENSP00000340736	9606.ENSP00000345464	0	0	0	0	0	0	0.9	0.52	0.949
GYS1	PYGM	9606.ENSP00000317904	9606.ENSP00000164139	0	0	0	0	0	0.154	0	0.802	0.825
GYS1	PYGB	9606.ENSP00000317904	9606.ENSP00000216962	0	0	0	0	0	0.157	0	0.782	0.809
GYS1	PPP1R3C	9606.ENSP00000317904	9606.ENSP00000238994	0	0	0	0	0	0.79	0.8	0.765	0.989
GYS1	GYS2	9606.ENSP00000317904	9606.ENSP00000261195	0	0	0	0.976	0	0	0.8	0.827	0.803
GYS1	UGP2	9606.ENSP00000317904	9606.ENSP00000338703	0	0	0	0	0	0	0.9	0.771	0.976
GYS1	NHLRC1	9606.ENSP00000317904	9606.ENSP00000345464	0	0	0	0	0	0.494	0.9	0.721	0.984
GYS2	PYGM	9606.ENSP00000261195	9606.ENSP00000164139	0	0	0	0	0	0.119	0	0.771	0.79
GYS2	PYGB	9606.ENSP00000261195	9606.ENSP00000216962	0	0	0	0	0	0.119	0	0.763	0.782
GYS2	PPP1R3C	9606.ENSP00000261195	9606.ENSP00000238994	0	0	0	0	0	0.828	0.8	0.465	0.98
GYS2	NHLRC1	9606.ENSP00000261195	9606.ENSP00000345464	0	0	0	0	0	0.056	0.9	0.294	0.927
GYS2	UGP2	9606.ENSP00000261195	9606.ENSP00000338703	0	0	0	0	0	0	0.9	0.729	0.971
NHLRC1	PPP1R3C	9606.ENSP00000345464	9606.ENSP00000238994	0	0	0	0	0	0.466	0.9	0.7	0.982
PYGB	PYGM	9606.ENSP00000216962	9606.ENSP00000164139	0	0	0	0.983	0	0.658	0.8	0.674	0.929
PYGB	UGP2	9606.ENSP00000216962	9606.ENSP00000338703	0	0	0	0	0	0	0.9	0.638	0.962
PYGM	UGP2	9606.ENSP00000164139	9606.ENSP00000338703	0	0	0	0	0	0	0.9	0.553	0.953
B2M	LILRB1	9606.ENSP00000452780	9606.ENSP00000315997	0	0	0	0	0	0.95	0.6	0.938	0.998
B2M	KIR2DL4	9606.ENSP00000452780	9606.ENSP00000339634	0	0	0	0	0	0	0.6	0.391	0.746
B2M	KLRD1	9606.ENSP00000452780	9606.ENSP00000371333	0	0	0	0	0	0.928	0.9	0.538	0.996
B2M	KIR3DL1	9606.ENSP00000452780	9606.ENSP00000375608	0	0	0	0	0	0.878	0.6	0.503	0.973
B2M	LILRB2	9606.ENSP00000452780	9606.ENSP00000375629	0	0	0	0	0	0.973	0.6	0.718	0.996
B2M	CD8A	9606.ENSP00000452780	9606.ENSP00000386559	0	0	0	0	0	0.935	0.9	0.863	0.999
B2M	HLA-G	9606.ENSP00000452780	9606.ENSP00000412927	0	0	0	0	0	0.982	0.8	0.963	0.999
B2M	KLRC1	9606.ENSP00000452780	9606.ENSP00000438038	0	0	0	0	0	0.945	0.9	0.513	0.997
CD160	HLA-G	9606.ENSP00000235933	9606.ENSP00000412927	0	0	0	0	0	0	0.6	0.942	0.975
CD8A	LILRB1	9606.ENSP00000386559	9606.ENSP00000315997	0	0	0	0	0	0	0	0.729	0.729
CD8A	KLRD1	9606.ENSP00000386559	9606.ENSP00000371333	0	0	0	0	0	0	0	0.714	0.714
CD8A	KLRC1	9606.ENSP00000386559	9606.ENSP00000438038	0	0	0	0	0	0	0	0.71	0.71
CD8A	HLA-G	9606.ENSP00000386559	9606.ENSP00000412927	0	0	0	0	0	0.711	0.6	0.908	0.988
HLA-G	STAC	9606.ENSP00000412927	9606.ENSP00000273183	0	0	0	0	0	0	0	0.946	0.946
HLA-G	LILRB1	9606.ENSP00000412927	9606.ENSP00000315997	0	0	0	0	0	0.962	0.6	0.989	0.999
HLA-G	KIR2DL4	9606.ENSP00000412927	9606.ENSP00000339634	0	0	0	0	0	0.282	0.6	0.989	0.996
HLA-G	KLRD1	9606.ENSP00000412927	9606.ENSP00000371333	0	0	0	0	0	0.225	0.6	0.906	0.968
HLA-G	KIR3DL1	9606.ENSP00000412927	9606.ENSP00000375608	0	0	0	0	0	0.057	0.8	0.889	0.977
HLA-G	LILRB2	9606.ENSP00000412927	9606.ENSP00000375629	0	0	0	0	0	0.972	0.6	0.989	0.999
HLA-G	KLRC1	9606.ENSP00000412927	9606.ENSP00000438038	0	0	0	0	0	0.68	0.6	0.895	0.985
KIR2DL4	STAC	9606.ENSP00000339634	9606.ENSP00000273183	0	0	0	0	0	0	0	0.803	0.803
KIR2DL4	KLRC1	9606.ENSP00000339634	9606.ENSP00000438038	0	0	0	0	0	0	0	0.766	0.766
KIR2DL4	KLRD1	9606.ENSP00000339634	9606.ENSP00000371333	0	0	0	0	0	0	0	0.773	0.773
KIR3DL1	STAC	9606.ENSP00000375608	9606.ENSP00000273183	0	0	0	0	0	0	0	0.788	0.788
KIR3DL1	KLRD1	9606.ENSP00000375608	9606.ENSP00000371333	0	0	0	0	0	0	0.8	0.851	0.968
KIR3DL1	KLRC1	9606.ENSP00000375608	9606.ENSP00000438038	0	0	0	0	0	0	0.8	0.861	0.971
KLRC1	LILRB1	9606.ENSP00000438038	9606.ENSP00000315997	0	0	0	0	0	0	0	0.803	0.803
KLRC1	KLRD1	9606.ENSP00000438038	9606.ENSP00000371333	0	0	0	0.78	0	0.973	0.9	0.994	0.997
KLRD1	LILRB1	9606.ENSP00000371333	9606.ENSP00000315997	0	0	0	0	0	0	0	0.769	0.769
LILRB2	STAC	9606.ENSP00000375629	9606.ENSP00000273183	0	0	0	0	0	0	0	0.75	0.75
IFI6	ISG20	9606.ENSP00000342513	9606.ENSP00000306565	0	0	0	0	0	0	0.9	0.608	0.959
IFI6	IFITM3	9606.ENSP00000342513	9606.ENSP00000382707	0	0	0	0	0	0	0.9	0.624	0.96
IFI6	IFIT2	9606.ENSP00000342513	9606.ENSP00000360891	0	0	0	0	0	0	0.9	0.637	0.962
IFI6	IRF7	9606.ENSP00000342513	9606.ENSP00000380697	0	0	0	0	0	0	0.9	0.603	0.958
IFI6	RSAD2	9606.ENSP00000342513	9606.ENSP00000371471	0	0	0	0	0	0	0.9	0.653	0.963
IFI6	IFIT3	9606.ENSP00000342513	9606.ENSP00000360883	0	0	0	0	0	0	0.9	0.681	0.966
IFI6	IFIT1	9606.ENSP00000342513	9606.ENSP00000360869	0	0	0	0	0	0	0.9	0.707	0.969
IFI6	MX1	9606.ENSP00000342513	9606.ENSP00000381601	0	0	0	0	0	0	0.9	0.69	0.967
IFI6	ISG15	9606.ENSP00000342513	9606.ENSP00000368699	0	0	0	0	0	0	0.9	0.715	0.97
IFIT1	ISG20	9606.ENSP00000360869	9606.ENSP00000306565	0	0	0	0	0	0	0.9	0.732	0.972
IFIT1	IFITM3	9606.ENSP00000360869	9606.ENSP00000382707	0	0	0	0	0	0	0.9	0.674	0.966
IFIT1	IRF7	9606.ENSP00000360869	9606.ENSP00000380697	0	0	0	0	0	0	0.9	0.795	0.978
IFIT1	ISG15	9606.ENSP00000360869	9606.ENSP00000368699	0	0	0	0	0	0.16	0.6	0.884	0.957
IFIT1	IFIT2	9606.ENSP00000360869	9606.ENSP00000360891	0	0	0	0.915	0	0.66	0.9	0.976	0.967
IFIT1	MX1	9606.ENSP00000360869	9606.ENSP00000381601	0	0	0	0	0	0	0.5	0.883	0.939
IFIT1	RSAD2	9606.ENSP00000360869	9606.ENSP00000371471	0	0	0	0	0	0.154	0.9	0.833	0.984
IFIT1	IFIT3	9606.ENSP00000360869	9606.ENSP00000360883	0	0	0	0.898	0	0.974	0.9	0.965	0.997
IFIT2	ISG20	9606.ENSP00000360891	9606.ENSP00000306565	0	0	0	0	0	0	0.9	0.707	0.969
IFIT2	IFIT3	9606.ENSP00000360891	9606.ENSP00000360883	0	0	0	0.945	0	0.875	0.9	0.954	0.987
IFIT2	IFITM3	9606.ENSP00000360891	9606.ENSP00000382707	0	0	0	0	0	0	0.9	0.635	0.962
IFIT2	IRF7	9606.ENSP00000360891	9606.ENSP00000380697	0	0	0	0	0	0	0.9	0.693	0.968
IFIT2	MX1	9606.ENSP00000360891	9606.ENSP00000381601	0	0	0	0	0	0	0.9	0.772	0.976
IFIT2	RSAD2	9606.ENSP00000360891	9606.ENSP00000371471	0	0	0	0	0	0.154	0.9	0.726	0.974
IFIT2	ISG15	9606.ENSP00000360891	9606.ENSP00000368699	0	0	0	0	0	0.16	0.9	0.794	0.981
IFIT3	ISG20	9606.ENSP00000360883	9606.ENSP00000306565	0	0	0	0	0	0	0.9	0.66	0.964
IFIT3	IFITM3	9606.ENSP00000360883	9606.ENSP00000382707	0	0	0	0	0	0	0.9	0.625	0.96
IFIT3	IRF7	9606.ENSP00000360883	9606.ENSP00000380697	0	0	0	0	0	0	0.9	0.683	0.966
IFIT3	MX1	9606.ENSP00000360883	9606.ENSP00000381601	0	0	0	0	0	0	0.9	0.763	0.975
IFIT3	ISG15	9606.ENSP00000360883	9606.ENSP00000368699	0	0	0	0	0	0.16	0.9	0.792	0.981
IFIT3	RSAD2	9606.ENSP00000360883	9606.ENSP00000371471	0	0	0	0	0	0.398	0.9	0.716	0.981
IFITM3	ISG20	9606.ENSP00000382707	9606.ENSP00000306565	0	0	0	0	0	0	0.9	0.61	0.959
IFITM3	VAPA	9606.ENSP00000382707	9606.ENSP00000345656	0	0	0	0	0	0	0	0.965	0.965
IFITM3	ISG15	9606.ENSP00000382707	9606.ENSP00000368699	0	0	0	0	0	0	0.9	0.676	0.966
IFITM3	RSAD2	9606.ENSP00000382707	9606.ENSP00000371471	0	0	0	0	0	0	0.9	0.722	0.971
IFITM3	IRF7	9606.ENSP00000382707	9606.ENSP00000380697	0	0	0	0	0	0	0.9	0.643	0.962
IFITM3	MX1	9606.ENSP00000382707	9606.ENSP00000381601	0	0	0	0	0	0	0.9	0.716	0.97
IRF7	ISG20	9606.ENSP00000380697	9606.ENSP00000306565	0	0	0	0	0	0	0.9	0.675	0.966
IRF7	ISG15	9606.ENSP00000380697	9606.ENSP00000368699	0	0	0	0	0	0	0.9	0.844	0.983
IRF7	RSAD2	9606.ENSP00000380697	9606.ENSP00000371471	0	0	0	0	0	0.182	0.9	0.836	0.985
IRF7	MX1	9606.ENSP00000380697	9606.ENSP00000381601	0	0	0	0	0	0	0.9	0.824	0.981
ISG15	ISG20	9606.ENSP00000368699	9606.ENSP00000306565	0	0	0	0	0	0	0.9	0.718	0.97
ISG15	MX1	9606.ENSP00000368699	9606.ENSP00000381601	0	0	0	0	0	0.149	0.6	0.88	0.955
ISG15	RSAD2	9606.ENSP00000368699	9606.ENSP00000371471	0	0	0	0	0	0	0.9	0.883	0.987
ISG20	RSAD2	9606.ENSP00000306565	9606.ENSP00000371471	0	0	0	0	0	0	0.9	0.67	0.965
ISG20	MX1	9606.ENSP00000306565	9606.ENSP00000381601	0	0	0	0	0	0	0.9	0.698	0.968
MX1	RSAD2	9606.ENSP00000381601	9606.ENSP00000371471	0	0	0	0	0	0	0.9	0.831	0.982
RSAD2	VAPA	9606.ENSP00000371471	9606.ENSP00000345656	0	0	0	0	0	0.651	0	0.94	0.978
IFNA1	USP18	9606.ENSP00000276927	9606.ENSP00000215794	0	0	0	0	0	0	0	0.77	0.77
IFNA1	IFNAR1	9606.ENSP00000276927	9606.ENSP00000270139	0	0	0	0	0	0.213	0.6	0.989	0.996
IFNA1	STAT2	9606.ENSP00000276927	9606.ENSP00000315768	0	0	0	0	0	0	0	0.831	0.831
IFNA1	STAT1	9606.ENSP00000276927	9606.ENSP00000354394	0	0	0	0	0	0	0	0.858	0.858
IFNA1	TYK2	9606.ENSP00000276927	9606.ENSP00000431885	0	0	0	0	0	0	0	0.933	0.933
IFNA1	JAK1	9606.ENSP00000276927	9606.ENSP00000343204	0	0	0	0	0	0	0.6	0.915	0.964
IFNA1	IFNAR2	9606.ENSP00000276927	9606.ENSP00000343957	0	0	0	0	0	0.27	0.6	0.988	0.996
IFNA2	IFNAR1	9606.ENSP00000369554	9606.ENSP00000270139	0	0	0	0	0	0.967	0.9	0.804	0.999
IFNA2	STAT2	9606.ENSP00000369554	9606.ENSP00000315768	0	0	0	0	0	0	0.6	0.537	0.806
IFNA2	JAK1	9606.ENSP00000369554	9606.ENSP00000343204	0	0	0	0	0	0	0.6	0.421	0.758
IFNA2	IFNAR2	9606.ENSP00000369554	9606.ENSP00000343957	0	0	0	0	0	0.973	0.9	0.899	0.999
IFNA2	STAT1	9606.ENSP00000369554	9606.ENSP00000354394	0	0	0	0	0	0	0.6	0.619	0.841
IFNA2	TYK2	9606.ENSP00000369554	9606.ENSP00000431885	0	0	0	0	0	0	0.6	0.398	0.748
IFNAR1	USP18	9606.ENSP00000270139	9606.ENSP00000215794	0	0	0	0	0	0	0	0.851	0.851
IFNAR1	IFNW1	9606.ENSP00000270139	9606.ENSP00000369578	0	0	0	0	0	0.932	0.8	0.472	0.992
IFNAR1	STAT1	9606.ENSP00000270139	9606.ENSP00000354394	0	0	0	0	0	0.345	0.9	0.984	0.998
IFNAR1	TYK2	9606.ENSP00000270139	9606.ENSP00000431885	0	0	0	0	0	0.972	0.9	0.99	0.999
IFNAR1	IFNAR2	9606.ENSP00000270139	9606.ENSP00000343957	0	0	0	0	0	0.944	0.9	0.989	0.999
IFNAR1	IFNB1	9606.ENSP00000270139	9606.ENSP00000369581	0	0	0	0	0	0.752	0.9	0.989	0.999
IFNAR1	STAT2	9606.ENSP00000270139	9606.ENSP00000315768	0	0	0	0	0	0.873	0.9	0.986	0.999
IFNAR1	JAK1	9606.ENSP00000270139	9606.ENSP00000343204	0	0	0	0	0	0.281	0.9	0.989	0.999
IFNAR2	USP18	9606.ENSP00000343957	9606.ENSP00000215794	0	0	0	0	0	0.675	0.8	0.988	0.999
IFNAR2	STAT2	9606.ENSP00000343957	9606.ENSP00000315768	0	0	0	0	0	0.837	0.9	0.963	0.999
IFNAR2	JAK1	9606.ENSP00000343957	9606.ENSP00000343204	0	0	0	0	0	0.486	0.9	0.989	0.999
IFNAR2	IFNW1	9606.ENSP00000343957	9606.ENSP00000369578	0	0	0	0	0	0.927	0.8	0.511	0.992
IFNAR2	STAT1	9606.ENSP00000343957	9606.ENSP00000354394	0	0	0	0	0	0.501	0.9	0.918	0.995
IFNAR2	IFNB1	9606.ENSP00000343957	9606.ENSP00000369581	0	0	0	0	0	0.27	0.9	0.986	0.998
IFNAR2	TYK2	9606.ENSP00000343957	9606.ENSP00000431885	0	0	0	0	0	0.213	0.9	0.988	0.998
IFNB1	STAT2	9606.ENSP00000369581	9606.ENSP00000315768	0	0	0	0	0	0	0.9	0.821	0.981
IFNB1	JAK1	9606.ENSP00000369581	9606.ENSP00000343204	0	0	0	0	0	0	0.9	0.683	0.966
IFNB1	STAT1	9606.ENSP00000369581	9606.ENSP00000354394	0	0	0	0	0	0	0.9	0.855	0.984
IFNB1	TYK2	9606.ENSP00000369581	9606.ENSP00000431885	0	0	0	0	0	0	0.9	0.69	0.967
JAK1	USP18	9606.ENSP00000343204	9606.ENSP00000215794	0	0	0	0	0	0.058	0.9	0.591	0.958
JAK1	STAT2	9606.ENSP00000343204	9606.ENSP00000315768	0	0	0	0	0	0.294	0.9	0.891	0.991
JAK1	TYK2	9606.ENSP00000343204	9606.ENSP00000431885	0	0	0	0.926	0	0.462	0.9	0.992	0.948
JAK1	STAT1	9606.ENSP00000343204	9606.ENSP00000354394	0	0	0	0	0	0.711	0.9	0.99	0.999
STAT1	USP18	9606.ENSP00000354394	9606.ENSP00000215794	0	0	0	0	0	0	0.9	0.672	0.965
STAT1	STAT2	9606.ENSP00000354394	9606.ENSP00000315768	0	0	0	0.889	0	0.881	0.9	0.992	0.988
STAT1	TYK2	9606.ENSP00000354394	9606.ENSP00000431885	0	0	0	0	0	0.518	0.9	0.912	0.995
STAT2	USP18	9606.ENSP00000315768	9606.ENSP00000215794	0	0	0	0	0	0.486	0	0.837	0.912
STAT2	TYK2	9606.ENSP00000315768	9606.ENSP00000431885	0	0	0	0	0	0.294	0.9	0.918	0.993
CCL2	IL17A	9606.ENSP00000225831	9606.ENSP00000344192	0	0	0	0	0	0	0	0.856	0.856
CCL2	STAT3	9606.ENSP00000225831	9606.ENSP00000264657	0	0	0	0	0	0	0.65	0.696	0.889
CCL2	IL4	9606.ENSP00000225831	9606.ENSP00000231449	0	0	0	0	0	0	0.9	0.86	0.985
CCL2	CXCL1	9606.ENSP00000225831	9606.ENSP00000379110	0	0	0	0	0	0	0.9	0.883	0.987
CCL2	TNF	9606.ENSP00000225831	9606.ENSP00000398698	0	0	0	0	0	0	0.9	0.93	0.992
CCL2	IL1B	9606.ENSP00000225831	9606.ENSP00000263341	0	0	0	0	0	0	0.9	0.927	0.992
CCL2	IL6	9606.ENSP00000225831	9606.ENSP00000385675	0	0	0	0	0	0	0.9	0.93	0.992
CCL2	CXCL8	9606.ENSP00000225831	9606.ENSP00000306512	0	0	0	0	0	0.28	0.9	0.923	0.993
CXCL1	IL4	9606.ENSP00000379110	9606.ENSP00000231449	0	0	0	0	0	0	0	0.739	0.739
CXCL1	IL1B	9606.ENSP00000379110	9606.ENSP00000263341	0	0	0	0	0	0	0.9	0.922	0.991
CXCL1	STAT3	9606.ENSP00000379110	9606.ENSP00000264657	0	0	0	0	0	0	0.65	0.643	0.869
CXCL1	IL17A	9606.ENSP00000379110	9606.ENSP00000344192	0	0	0	0	0	0	0	0.853	0.853
CXCL1	TNF	9606.ENSP00000379110	9606.ENSP00000398698	0	0	0	0	0	0	0.9	0.863	0.985
CXCL1	IL6	9606.ENSP00000379110	9606.ENSP00000385675	0	0	0	0	0	0	0.9	0.925	0.992
CXCL8	IL4	9606.ENSP00000306512	9606.ENSP00000231449	0	0	0	0	0	0	0.9	0.873	0.986
CXCL8	IL1B	9606.ENSP00000306512	9606.ENSP00000263341	0	0	0	0	0	0	0.9	0.948	0.994
CXCL8	STAT3	9606.ENSP00000306512	9606.ENSP00000264657	0	0	0	0	0	0	0.65	0.732	0.902
CXCL8	IL17A	9606.ENSP00000306512	9606.ENSP00000344192	0	0	0	0	0	0	0	0.891	0.891
CXCL8	TNF	9606.ENSP00000306512	9606.ENSP00000398698	0	0	0	0	0	0	0.9	0.921	0.991
CXCL8	IL6	9606.ENSP00000306512	9606.ENSP00000385675	0	0	0	0	0	0	0.9	0.947	0.994
IL17A	IL4	9606.ENSP00000344192	9606.ENSP00000231449	0	0	0	0	0	0	0	0.914	0.914
IL17A	IL1B	9606.ENSP00000344192	9606.ENSP00000263341	0	0	0	0	0	0	0	0.948	0.948
IL17A	STAT3	9606.ENSP00000344192	9606.ENSP00000264657	0	0	0	0	0	0.73	0.9	0.813	0.994
IL17A	TNF	9606.ENSP00000344192	9606.ENSP00000398698	0	0	0	0	0	0	0	0.989	0.989
IL17A	IL6	9606.ENSP00000344192	9606.ENSP00000385675	0	0	0	0	0	0	0.9	0.949	0.994
IL1B	IL4	9606.ENSP00000263341	9606.ENSP00000231449	0	0	0	0	0	0	0.9	0.91	0.99
IL1B	STAT3	9606.ENSP00000263341	9606.ENSP00000264657	0	0	0	0	0	0	0.65	0.831	0.938
IL1B	TNF	9606.ENSP00000263341	9606.ENSP00000398698	0	0	0	0	0	0	0.5	0.942	0.969
IL1B	IL6	9606.ENSP00000263341	9606.ENSP00000385675	0	0	0	0	0	0	0.9	0.953	0.995
IL4	IL6ST	9606.ENSP00000231449	9606.ENSP00000370698	0	0	0	0	0	0	0.6	0.31	0.712
IL4	IL6R	9606.ENSP00000231449	9606.ENSP00000357470	0	0	0	0	0	0	0.6	0.524	0.801
IL4	STAT3	9606.ENSP00000231449	9606.ENSP00000264657	0	0	0	0	0	0	0.6	0.736	0.89
IL4	IL6	9606.ENSP00000231449	9606.ENSP00000385675	0	0	0	0	0	0	0.9	0.916	0.991
IL4	TNF	9606.ENSP00000231449	9606.ENSP00000398698	0	0	0	0	0	0	0.9	0.933	0.993
IL6	STAT3	9606.ENSP00000385675	9606.ENSP00000264657	0	0	0	0	0	0.182	0.9	0.917	0.992
IL6	IL6R	9606.ENSP00000385675	9606.ENSP00000357470	0	0	0	0	0	0.978	0.9	0.989	0.999
IL6	IL6ST	9606.ENSP00000385675	9606.ENSP00000370698	0	0	0	0	0	0.974	0.9	0.988	0.999
IL6	TNF	9606.ENSP00000385675	9606.ENSP00000398698	0	0	0	0	0	0	0.9	0.941	0.993
IL6R	STAT3	9606.ENSP00000357470	9606.ENSP00000264657	0	0	0	0	0	0.27	0.9	0.832	0.986
IL6R	TNF	9606.ENSP00000357470	9606.ENSP00000398698	0	0	0	0	0	0.189	0	0.687	0.735
IL6R	IL6ST	9606.ENSP00000357470	9606.ENSP00000370698	0	0	0	0.559	0	0.901	0.9	0.977	0.994
IL6ST	STAT3	9606.ENSP00000370698	9606.ENSP00000264657	0	0	0	0	0	0.317	0.9	0.819	0.986
STAT3	TNF	9606.ENSP00000264657	9606.ENSP00000398698	0	0	0	0	0	0	0.65	0.839	0.941
CD28	ITGB7	9606.ENSP00000324890	9606.ENSP00000267082	0	0	0	0	0	0	0.9	0.31	0.928
CD28	ITGB3	9606.ENSP00000324890	9606.ENSP00000452786	0	0	0	0	0	0	0.9	0.156	0.911
CD28	ITGB1	9606.ENSP00000324890	9606.ENSP00000379350	0	0	0	0	0	0	0.9	0.407	0.938
CD28	ITGB2	9606.ENSP00000324890	9606.ENSP00000380948	0	0	0	0	0	0	0.9	0.391	0.936
CD28	ITGA4	9606.ENSP00000324890	9606.ENSP00000380227	0	0	0	0	0	0	0.9	0.804	0.979
FN1	ITGB7	9606.ENSP00000346839	9606.ENSP00000267082	0	0	0	0	0	0.27	0.9	0.485	0.959
FN1	PXN	9606.ENSP00000346839	9606.ENSP00000267257	0	0	0	0	0	0.247	0.9	0.962	0.996
FN1	VCAM1	9606.ENSP00000346839	9606.ENSP00000294728	0	0	0	0	0	0	0	0.951	0.951
FN1	ITGB2	9606.ENSP00000346839	9606.ENSP00000380948	0	0	0	0	0	0	0.6	0.656	0.856
FN1	YWHAZ	9606.ENSP00000346839	9606.ENSP00000379287	0	0	0	0	0	0.063	0.9	0.346	0.933
FN1	ITGB3	9606.ENSP00000346839	9606.ENSP00000452786	0	0	0	0	0	0.974	0.9	0.972	0.999
FN1	ITGA4	9606.ENSP00000346839	9606.ENSP00000380227	0	0	0	0	0	0.487	0.9	0.988	0.999
FN1	ITGB1	9606.ENSP00000346839	9606.ENSP00000379350	0	0	0	0	0	0.876	0.9	0.989	0.999
ITGA4	MADCAM1	9606.ENSP00000380227	9606.ENSP00000215637	0	0	0	0	0	0.823	0.9	0.763	0.995
ITGA4	ITGB7	9606.ENSP00000380227	9606.ENSP00000267082	0	0	0	0	0	0.979	0.9	0.885	0.999
ITGA4	PXN	9606.ENSP00000380227	9606.ENSP00000267257	0	0	0	0	0	0.77	0.9	0.985	0.999
ITGA4	VCAM1	9606.ENSP00000380227	9606.ENSP00000294728	0	0	0	0	0	0.093	0.9	0.989	0.998
ITGA4	YWHAZ	9606.ENSP00000380227	9606.ENSP00000379287	0	0	0	0	0	0.807	0.9	0.432	0.988
ITGA4	ITGB1	9606.ENSP00000380227	9606.ENSP00000379350	0	0	0	0	0	0.844	0.9	0.99	0.999
ITGA4	ITGB2	9606.ENSP00000380227	9606.ENSP00000380948	0	0	0	0	0	0.336	0.9	0.735	0.98
ITGA4	ITGB3	9606.ENSP00000380227	9606.ENSP00000452786	0	0	0	0	0	0.496	0.9	0.683	0.982
ITGB1	ITGB7	9606.ENSP00000379350	9606.ENSP00000267082	0	0	0	0.927	0	0	0.9	0.52	0.903
ITGB1	PXN	9606.ENSP00000379350	9606.ENSP00000267257	0	0	0	0	0	0.87	0.9	0.926	0.998
ITGB1	VCAM1	9606.ENSP00000379350	9606.ENSP00000294728	0	0	0	0	0	0.189	0.9	0.966	0.997
ITGB1	YWHAZ	9606.ENSP00000379350	9606.ENSP00000379287	0	0	0	0	0	0.057	0.9	0.195	0.917
ITGB1	ITGB2	9606.ENSP00000379350	9606.ENSP00000380948	0	0	0	0.931	0	0	0.9	0.642	0.904
ITGB1	ITGB3	9606.ENSP00000379350	9606.ENSP00000452786	0	0	0	0.923	0	0.273	0.9	0.736	0.928
ITGB2	ITGB7	9606.ENSP00000380948	9606.ENSP00000267082	0	0	0	0.93	0	0	0.9	0.577	0.903
ITGB2	VCAM1	9606.ENSP00000380948	9606.ENSP00000294728	0	0	0	0	0	0	0.9	0.935	0.993
ITGB2	YWHAZ	9606.ENSP00000380948	9606.ENSP00000379287	0	0	0	0	0	0.283	0	0.637	0.728
ITGB2	ITGB3	9606.ENSP00000380948	9606.ENSP00000452786	0	0	0	0.892	0	0	0.9	0.648	0.906
ITGB3	ITGB7	9606.ENSP00000452786	9606.ENSP00000267082	0	0	0	0.889	0	0	0.9	0.391	0.904
ITGB3	PXN	9606.ENSP00000452786	9606.ENSP00000267257	0	0	0	0	0	0.298	0.9	0.851	0.988
ITGB7	MADCAM1	9606.ENSP00000267082	9606.ENSP00000215637	0	0	0	0	0	0.27	0.9	0.797	0.983
ITGB7	PXN	9606.ENSP00000267082	9606.ENSP00000267257	0	0	0	0	0	0.078	0.9	0.435	0.943
ITGB7	VCAM1	9606.ENSP00000267082	9606.ENSP00000294728	0	0	0	0	0	0.213	0.9	0.335	0.943
PXN	VCAM1	9606.ENSP00000267257	9606.ENSP00000294728	0	0	0	0	0	0.044	0.9	0.428	0.94
PXN	YWHAZ	9606.ENSP00000267257	9606.ENSP00000379287	0	0	0	0	0	0.06	0.9	0.503	0.949
AKAP9	KCNQ1	9606.ENSP00000348573	9606.ENSP00000155840	0	0	0	0	0	0.675	0.8	0.989	0.999
AKAP9	KCNE4	9606.ENSP00000348573	9606.ENSP00000281830	0	0	0	0	0	0	0.6	0.293	0.705
AKAP9	KCNE3	9606.ENSP00000348573	9606.ENSP00000310557	0	0	0	0	0	0	0.6	0.652	0.854
AKAP9	KCNE1	9606.ENSP00000348573	9606.ENSP00000337255	0	0	0	0	0	0	0.6	0.927	0.969
AKAP9	KCNE1L	9606.ENSP00000348573	9606.ENSP00000361173	0	0	0	0	0	0	0.6	0.377	0.74
KCNE1	KCNQ1	9606.ENSP00000337255	9606.ENSP00000155840	0	0	0	0	0	0.756	0.8	0.996	0.999
KCNE1	KCNJ2	9606.ENSP00000337255	9606.ENSP00000243457	0	0	0	0	0	0	0	0.868	0.868
KCNE1	KCNH2	9606.ENSP00000337255	9606.ENSP00000262186	0	0	0	0	0	0.27	0.6	0.977	0.992
KCNE1	KCNQ4	9606.ENSP00000337255	9606.ENSP00000262916	0	0	0	0	0	0	0	0.873	0.873
KCNE1	KCNE4	9606.ENSP00000337255	9606.ENSP00000281830	0	0	0	0	0	0	0	0.863	0.863
KCNE1	KCNE3	9606.ENSP00000337255	9606.ENSP00000310557	0	0	0	0	0	0	0	0.934	0.934
KCNE1	KCNQ2	9606.ENSP00000337255	9606.ENSP00000352035	0	0	0	0	0	0	0	0.833	0.833
KCNE1	KCNE1L	9606.ENSP00000337255	9606.ENSP00000361173	0	0	0	0	0	0	0	0.836	0.836
KCNE1	SCN5A	9606.ENSP00000337255	9606.ENSP00000410257	0	0	0	0	0	0	0	0.899	0.899
KCNE1L	KCNQ1	9606.ENSP00000361173	9606.ENSP00000155840	0	0	0	0	0	0	0.6	0.738	0.89
KCNE1L	KCNH2	9606.ENSP00000361173	9606.ENSP00000262186	0	0	0	0	0	0	0.6	0.668	0.861
KCNE1L	KCNE4	9606.ENSP00000361173	9606.ENSP00000281830	0	0	0	0	0	0	0	0.822	0.822
KCNE1L	KCNE3	9606.ENSP00000361173	9606.ENSP00000310557	0	0	0	0	0	0	0	0.856	0.856
KCNE3	KCNQ1	9606.ENSP00000310557	9606.ENSP00000155840	0	0	0	0	0	0	0.8	0.99	0.997
KCNE3	KCNH2	9606.ENSP00000310557	9606.ENSP00000262186	0	0	0	0	0	0	0.6	0.69	0.87
KCNE3	KCNQ4	9606.ENSP00000310557	9606.ENSP00000262916	0	0	0	0	0	0	0	0.712	0.712
KCNE3	KCNE4	9606.ENSP00000310557	9606.ENSP00000281830	0	0	0	0	0	0	0	0.875	0.875
KCNE3	SCN5A	9606.ENSP00000310557	9606.ENSP00000410257	0	0	0	0	0	0	0	0.72	0.72
KCNE4	KCNQ1	9606.ENSP00000281830	9606.ENSP00000155840	0	0	0	0	0	0.227	0.6	0.838	0.945
KCNE4	KCNH2	9606.ENSP00000281830	9606.ENSP00000262186	0	0	0	0	0	0	0.6	0.561	0.816
KCNE4	KCNQ4	9606.ENSP00000281830	9606.ENSP00000262916	0	0	0	0	0	0.059	0	0.764	0.768
KCNE4	KCNQ2	9606.ENSP00000281830	9606.ENSP00000352035	0	0	0	0	0	0.059	0	0.708	0.713
KCNH2	KCNQ1	9606.ENSP00000262186	9606.ENSP00000155840	0	0	0	0	0	0	0.5	0.976	0.987
KCNH2	KCNJ2	9606.ENSP00000262186	9606.ENSP00000243457	0	0	0	0	0	0	0	0.881	0.881
KCNH2	KCNQ4	9606.ENSP00000262186	9606.ENSP00000262916	0	0	0	0	0	0	0.5	0.594	0.788
KCNH2	KCNQ2	9606.ENSP00000262186	9606.ENSP00000352035	0	0	0	0	0	0	0.5	0.67	0.828
KCNH2	SCN5A	9606.ENSP00000262186	9606.ENSP00000410257	0	0	0	0	0	0.077	0	0.957	0.959
KCNJ2	KCNQ1	9606.ENSP00000243457	9606.ENSP00000155840	0	0	0	0	0	0	0.8	0.907	0.98
KCNJ2	KCNQ4	9606.ENSP00000243457	9606.ENSP00000262916	0	0	0	0	0	0	0.8	0.215	0.836
KCNJ2	KCNQ2	9606.ENSP00000243457	9606.ENSP00000352035	0	0	0	0	0	0	0.8	0.316	0.857
KCNJ2	SCN5A	9606.ENSP00000243457	9606.ENSP00000410257	0	0	0	0	0	0.392	0	0.861	0.912
KCNQ1	KCNQ4	9606.ENSP00000155840	9606.ENSP00000262916	0	0	0	0.858	0	0	0.8	0.901	0.825
KCNQ1	KCNQ2	9606.ENSP00000155840	9606.ENSP00000352035	0	0	0	0.854	0	0.27	0.8	0.865	0.866
KCNQ1	SCN5A	9606.ENSP00000155840	9606.ENSP00000410257	0	0	0	0	0	0.074	0	0.887	0.891
KCNQ2	KCNQ4	9606.ENSP00000352035	9606.ENSP00000262916	0	0	0	0.943	0	0	0.8	0.942	0.81
KCNQ2	SCN5A	9606.ENSP00000352035	9606.ENSP00000410257	0	0	0	0	0	0.074	0.5	0.502	0.749
BBS1	BBS9	9606.ENSP00000317469	9606.ENSP00000242067	0	0	0	0	0	0.979	0.9	0.983	0.999
BBS1	BBS2	9606.ENSP00000317469	9606.ENSP00000245157	0	0	0	0	0	0.837	0.9	0.995	0.999
BBS1	MCHR1	9606.ENSP00000317469	9606.ENSP00000249016	0	0	0	0	0	0	0.6	0.603	0.834
BBS1	SMO	9606.ENSP00000317469	9606.ENSP00000249373	0	0	0	0	0	0	0.6	0.431	0.762
BBS1	BBS7	9606.ENSP00000317469	9606.ENSP00000264499	0	0	0	0	0	0.875	0.9	0.962	0.999
BBS1	BBS4	9606.ENSP00000317469	9606.ENSP00000268057	0	0	0	0	0	0.982	0.9	0.974	0.999
BBS1	BBS5	9606.ENSP00000317469	9606.ENSP00000295240	0	0	0	0	0	0.894	0.9	0.966	0.999
BBS1	LZTFL1	9606.ENSP00000317469	9606.ENSP00000296135	0	0	0	0	0	0.827	0.6	0.731	0.979
BBS1	SSTR3	9606.ENSP00000317469	9606.ENSP00000480971	0	0	0	0	0	0	0.6	0.688	0.87
BBS1	TTC8	9606.ENSP00000317469	9606.ENSP00000482306	0	0	0	0	0	0.978	0.9	0.861	0.999
BBS2	BBS9	9606.ENSP00000245157	9606.ENSP00000242067	0	0	0	0	0	0.902	0.9	0.977	0.999
BBS2	MCHR1	9606.ENSP00000245157	9606.ENSP00000249016	0	0	0	0	0	0	0.6	0.641	0.85
BBS2	SSTR3	9606.ENSP00000245157	9606.ENSP00000480971	0	0	0	0	0	0	0.6	0.719	0.883
BBS2	LZTFL1	9606.ENSP00000245157	9606.ENSP00000296135	0	0	0	0	0	0.755	0.6	0.799	0.978
BBS2	TTC8	9606.ENSP00000245157	9606.ENSP00000482306	0	0	0	0	0	0.795	0.9	0.807	0.995
BBS2	BBS5	9606.ENSP00000245157	9606.ENSP00000295240	0	0	0	0	0	0.89	0.9	0.959	0.999
BBS2	BBS7	9606.ENSP00000245157	9606.ENSP00000264499	0	0	0	0	0	0.9	0.9	0.988	0.999
BBS2	BBS4	9606.ENSP00000245157	9606.ENSP00000268057	0	0	0	0	0	0.92	0.9	0.992	0.999
BBS4	BBS9	9606.ENSP00000268057	9606.ENSP00000242067	0	0	0	0	0	0.969	0.9	0.937	0.999
BBS4	MCHR1	9606.ENSP00000268057	9606.ENSP00000249016	0	0	0	0	0	0	0.6	0.644	0.851
BBS4	BBS7	9606.ENSP00000268057	9606.ENSP00000264499	0	0	0	0	0	0.902	0.9	0.958	0.999
BBS4	SSTR3	9606.ENSP00000268057	9606.ENSP00000480971	0	0	0	0	0	0	0.6	0.689	0.87
BBS4	LZTFL1	9606.ENSP00000268057	9606.ENSP00000296135	0	0	0	0	0	0.865	0.6	0.637	0.978
BBS4	TTC8	9606.ENSP00000268057	9606.ENSP00000482306	0	0	0	0.562	0	0.957	0.9	0.865	0.997
BBS4	BBS5	9606.ENSP00000268057	9606.ENSP00000295240	0	0	0	0	0	0.914	0.9	0.994	0.999
BBS5	BBS9	9606.ENSP00000295240	9606.ENSP00000242067	0	0	0	0	0	0.887	0.9	0.985	0.999
BBS5	MCHR1	9606.ENSP00000295240	9606.ENSP00000249016	0	0	0	0	0	0	0.6	0.49	0.787
BBS5	BBS7	9606.ENSP00000295240	9606.ENSP00000264499	0	0	0	0	0	0.791	0.9	0.994	0.999
BBS5	SSTR3	9606.ENSP00000295240	9606.ENSP00000480971	0	0	0	0	0	0	0.6	0.638	0.849
BBS5	LZTFL1	9606.ENSP00000295240	9606.ENSP00000296135	0	0	0	0	0	0.879	0.6	0.814	0.99
BBS5	TTC8	9606.ENSP00000295240	9606.ENSP00000482306	0	0	0	0	0	0.893	0.9	0.874	0.998
BBS7	BBS9	9606.ENSP00000264499	9606.ENSP00000242067	0	0	0	0	0	0.819	0.9	0.994	0.999
BBS7	MCHR1	9606.ENSP00000264499	9606.ENSP00000249016	0	0	0	0	0	0	0.6	0.497	0.79
BBS7	SMO	9606.ENSP00000264499	9606.ENSP00000249373	0	0	0	0	0	0	0.6	0.308	0.711
BBS7	SSTR3	9606.ENSP00000264499	9606.ENSP00000480971	0	0	0	0	0	0	0.6	0.606	0.835
BBS7	LZTFL1	9606.ENSP00000264499	9606.ENSP00000296135	0	0	0	0	0	0.835	0.6	0.809	0.986
BBS7	TTC8	9606.ENSP00000264499	9606.ENSP00000482306	0	0	0	0	0	0.812	0.9	0.85	0.996
BBS9	MCHR1	9606.ENSP00000242067	9606.ENSP00000249016	0	0	0	0	0	0.061	0.6	0.428	0.766
BBS9	SSTR3	9606.ENSP00000242067	9606.ENSP00000480971	0	0	0	0	0	0.061	0.6	0.569	0.824
BBS9	LZTFL1	9606.ENSP00000242067	9606.ENSP00000296135	0	0	0	0	0	0.877	0.6	0.858	0.992
BBS9	TTC8	9606.ENSP00000242067	9606.ENSP00000482306	0	0	0	0	0	0.94	0.9	0.891	0.999
LZTFL1	MCHR1	9606.ENSP00000296135	9606.ENSP00000249016	0	0	0	0	0	0	0.9	0.213	0.917
LZTFL1	SMO	9606.ENSP00000296135	9606.ENSP00000249373	0	0	0	0	0	0	0.9	0.37	0.934
LZTFL1	SSTR3	9606.ENSP00000296135	9606.ENSP00000480971	0	0	0	0	0	0	0.9	0.468	0.944
LZTFL1	TTC8	9606.ENSP00000296135	9606.ENSP00000482306	0	0	0	0	0	0.818	0.6	0.693	0.975
MCHR1	TTC8	9606.ENSP00000249016	9606.ENSP00000482306	0	0	0	0	0	0	0.6	0.431	0.762
MCHR1	SMO	9606.ENSP00000249016	9606.ENSP00000249373	0	0	0	0	0	0	0.9	0.303	0.927
SMO	SSTR3	9606.ENSP00000249373	9606.ENSP00000480971	0	0	0	0	0	0	0.9	0.52	0.95
SSTR3	TTC8	9606.ENSP00000480971	9606.ENSP00000482306	0	0	0	0	0	0	0.6	0.326	0.718
APOE	SNCA	9606.ENSP00000252486	9606.ENSP00000338345	0	0	0	0	0	0.878	0	0.761	0.969
APOE	MAPT	9606.ENSP00000252486	9606.ENSP00000340820	0	0	0	0	0	0.823	0	0.983	0.996
CASP3	GSK3B	9606.ENSP00000311032	9606.ENSP00000324806	0	0	0	0	0	0.068	0	0.698	0.706
CASP3	MAPT	9606.ENSP00000311032	9606.ENSP00000340820	0	0	0	0	0	0.731	0.9	0.601	0.988
CDK5	GSK3B	9606.ENSP00000419782	9606.ENSP00000324806	0	0	0.317	0.824	0	0.47	0.9	0.791	0.954
CDK5	MAPT	9606.ENSP00000419782	9606.ENSP00000340820	0	0	0	0	0	0.905	0.9	0.765	0.997
CDK5	FYN	9606.ENSP00000419782	9606.ENSP00000346671	0	0	0	0.645	0	0.302	0.8	0.7	0.89
FYN	GSK3B	9606.ENSP00000346671	9606.ENSP00000324806	0	0	0	0.562	0	0.077	0.9	0.484	0.923
FYN	SNCA	9606.ENSP00000346671	9606.ENSP00000338345	0	0	0	0	0	0.768	0.9	0.326	0.983
FYN	MAPT	9606.ENSP00000346671	9606.ENSP00000340820	0	0	0	0	0	0.883	0	0.98	0.997
GSK3B	SNCA	9606.ENSP00000324806	9606.ENSP00000338345	0	0	0	0	0	0.334	0	0.591	0.716
GSK3B	YWHAZ	9606.ENSP00000324806	9606.ENSP00000379287	0	0	0	0	0	0.98	0	0.597	0.991
GSK3B	MAPT	9606.ENSP00000324806	9606.ENSP00000340820	0	0	0	0	0	0.994	0.9	0.75	0.999
MAPT	S100B	9606.ENSP00000340820	9606.ENSP00000291700	0	0	0	0	0	0.968	0	0.66	0.988
MAPT	TUBB3	9606.ENSP00000340820	9606.ENSP00000320295	0	0	0	0	0	0.891	0.8	0.447	0.986
MAPT	SNCA	9606.ENSP00000340820	9606.ENSP00000338345	0	0	0	0	0	0.756	0	0.949	0.987
MAPT	MARK2	9606.ENSP00000340820	9606.ENSP00000385751	0	0	0	0	0	0.829	0.9	0.491	0.99
MAPT	YWHAZ	9606.ENSP00000340820	9606.ENSP00000379287	0	0	0	0	0	0.908	0	0.928	0.993
MARK2	YWHAZ	9606.ENSP00000385751	9606.ENSP00000379287	0	0	0	0	0	0.851	0	0.26	0.885
SNCA	TUBB3	9606.ENSP00000338345	9606.ENSP00000320295	0	0	0	0	0	0.056	0	0.716	0.721
MRPL42	MRPS7	9606.ENSP00000449884	9606.ENSP00000245539	0	0	0	0	0	0.823	0.9	0.118	0.983
MRPL42	MRPS18B	9606.ENSP00000449884	9606.ENSP00000259873	0	0	0	0	0	0.981	0.9	0.426	0.998
MRPL42	MRPS5	9606.ENSP00000449884	9606.ENSP00000272418	0	0	0	0	0	0.835	0.9	0.551	0.991
MRPL42	MRPS31	9606.ENSP00000449884	9606.ENSP00000315397	0	0	0	0	0	0.981	0.54	0	0.991
MRPL42	MRPS11	9606.ENSP00000449884	9606.ENSP00000317376	0	0	0	0	0	0.981	0.9	0.124	0.998
MRPL42	MRPS15	9606.ENSP00000449884	9606.ENSP00000362208	0	0	0	0	0	0.916	0.9	0.112	0.991
MRPL42	MRPS33	9606.ENSP00000449884	9606.ENSP00000376732	0	0	0	0	0	0.981	0.9	0	0.998
MRPL42	MRPS6	9606.ENSP00000449884	9606.ENSP00000382250	0	0	0	0	0	0.981	0.9	0.093	0.998
MRPL42	MRPS27	9606.ENSP00000449884	9606.ENSP00000426941	0	0	0	0	0	0.825	0.9	0.322	0.987
MRPL42	MRPS21	9606.ENSP00000449884	9606.ENSP00000461930	0	0	0	0	0	0.981	0.9	0.107	0.998
MRPS11	MRPS7	9606.ENSP00000317376	9606.ENSP00000245539	0	0	0	0	0	0.943	0.9	0.427	0.996
MRPS11	MRPS18B	9606.ENSP00000317376	9606.ENSP00000259873	0	0	0	0	0	0.913	0.9	0.332	0.993
MRPS11	MRPS5	9606.ENSP00000317376	9606.ENSP00000272418	0	0	0	0	0	0.982	0.9	0.337	0.998
MRPS11	MRPS31	9606.ENSP00000317376	9606.ENSP00000315397	0	0	0	0	0	0.957	0.8	0.076	0.991
MRPS11	MRPS27	9606.ENSP00000317376	9606.ENSP00000426941	0	0	0	0	0	0.913	0.9	0	0.99
MRPS11	MRPS33	9606.ENSP00000317376	9606.ENSP00000376732	0	0	0	0	0	0.914	0.9	0.08	0.991
MRPS11	MRPS21	9606.ENSP00000317376	9606.ENSP00000461930	0	0	0	0	0	0.914	0.9	0.452	0.994
MRPS11	MRPS6	9606.ENSP00000317376	9606.ENSP00000382250	0	0	0	0	0	0.921	0.9	0.456	0.995
MRPS11	MRPS15	9606.ENSP00000317376	9606.ENSP00000362208	0	0	0	0	0	0.946	0.9	0.561	0.997
MRPS15	MRPS7	9606.ENSP00000362208	9606.ENSP00000245539	0	0	0	0	0	0.972	0.9	0.568	0.998
MRPS15	MRPS18B	9606.ENSP00000362208	9606.ENSP00000259873	0	0	0	0	0	0.839	0.9	0.401	0.989
MRPS15	MRPS5	9606.ENSP00000362208	9606.ENSP00000272418	0	0	0	0	0	0.995	0.9	0.459	0.999
MRPS15	MRPS31	9606.ENSP00000362208	9606.ENSP00000315397	0	0	0	0	0	0.975	0.8	0.063	0.995
MRPS15	MRPS33	9606.ENSP00000362208	9606.ENSP00000376732	0	0	0	0	0	0.912	0.9	0.108	0.991
MRPS15	MRPS21	9606.ENSP00000362208	9606.ENSP00000461930	0	0	0	0	0	0.942	0.9	0.483	0.996
MRPS15	MRPS27	9606.ENSP00000362208	9606.ENSP00000426941	0	0	0	0	0	0.961	0.9	0.462	0.997
MRPS15	MRPS6	9606.ENSP00000362208	9606.ENSP00000382250	0	0	0	0	0	0.994	0.9	0.48	0.999
MRPS18B	MRPS7	9606.ENSP00000259873	9606.ENSP00000245539	0	0	0	0	0	0.842	0.9	0.63	0.993
MRPS18B	MRPS5	9606.ENSP00000259873	9606.ENSP00000272418	0	0	0	0	0	0.842	0.9	0.367	0.989
MRPS18B	MRPS21	9606.ENSP00000259873	9606.ENSP00000461930	0	0	0	0	0	0.842	0.9	0.336	0.988
MRPS18B	MRPS6	9606.ENSP00000259873	9606.ENSP00000382250	0	0	0	0	0	0.88	0.9	0.269	0.99
MRPS18B	MRPS31	9606.ENSP00000259873	9606.ENSP00000315397	0	0	0	0	0	0.971	0.6	0.716	0.996
MRPS18B	MRPS33	9606.ENSP00000259873	9606.ENSP00000376732	0	0	0	0	0	0.842	0.9	0.794	0.996
MRPS18B	MRPS27	9606.ENSP00000259873	9606.ENSP00000426941	0	0	0	0	0	0.958	0.9	0.668	0.998
MRPS21	MRPS7	9606.ENSP00000461930	9606.ENSP00000245539	0	0	0	0	0	0.842	0.9	0.276	0.987
MRPS21	MRPS5	9606.ENSP00000461930	9606.ENSP00000272418	0	0	0	0	0	0.868	0.9	0.645	0.994
MRPS21	MRPS31	9606.ENSP00000461930	9606.ENSP00000315397	0	0	0	0	0	0.969	0.8	0.25	0.995
MRPS21	MRPS33	9606.ENSP00000461930	9606.ENSP00000376732	0	0	0	0	0	0.842	0.9	0.761	0.995
MRPS21	MRPS6	9606.ENSP00000461930	9606.ENSP00000382250	0	0	0	0	0	0.842	0.9	0.378	0.989
MRPS21	MRPS27	9606.ENSP00000461930	9606.ENSP00000426941	0	0	0	0	0	0.935	0.9	0.671	0.997
MRPS27	MRPS7	9606.ENSP00000426941	9606.ENSP00000245539	0	0	0	0	0	0.899	0.9	0.404	0.993
MRPS27	MRPS5	9606.ENSP00000426941	9606.ENSP00000272418	0	0	0	0	0	0.956	0.9	0.675	0.998
MRPS27	MRPS31	9606.ENSP00000426941	9606.ENSP00000315397	0	0	0	0	0	0.977	0.8	0.242	0.996
MRPS27	MRPS33	9606.ENSP00000426941	9606.ENSP00000376732	0	0	0	0	0	0.913	0.9	0.095	0.991
MRPS27	MRPS6	9606.ENSP00000426941	9606.ENSP00000382250	0	0	0	0	0	0.842	0.9	0.081	0.984
MRPS31	MRPS7	9606.ENSP00000315397	9606.ENSP00000245539	0	0	0	0	0	0.978	0.8	0.064	0.995
MRPS31	MRPS5	9606.ENSP00000315397	9606.ENSP00000272418	0	0	0	0	0	0.967	0.8	0	0.993
MRPS31	MRPS6	9606.ENSP00000315397	9606.ENSP00000382250	0	0	0	0	0	0.912	0.8	0	0.981
MRPS31	MRPS33	9606.ENSP00000315397	9606.ENSP00000376732	0	0	0	0	0	0.967	0.8	0.773	0.998
MRPS33	MRPS7	9606.ENSP00000376732	9606.ENSP00000245539	0	0	0	0	0	0.842	0.9	0.36	0.989
MRPS33	MRPS5	9606.ENSP00000376732	9606.ENSP00000272418	0	0	0	0	0	0.958	0.9	0.086	0.995
MRPS33	MRPS6	9606.ENSP00000376732	9606.ENSP00000382250	0	0	0	0	0	0.842	0.9	0.39	0.989
MRPS5	MRPS7	9606.ENSP00000272418	9606.ENSP00000245539	0	0	0	0	0	0.984	0.9	0.595	0.999
MRPS5	MRPS6	9606.ENSP00000272418	9606.ENSP00000382250	0	0	0	0	0	0.986	0.9	0.361	0.999
MRPS6	MRPS7	9606.ENSP00000382250	9606.ENSP00000245539	0	0	0	0	0	0.954	0.9	0.31	0.996
IFIT2	IRF1	9606.ENSP00000360891	9606.ENSP00000245414	0	0	0	0	0	0	0.9	0.621	0.96
IFIT2	OASL	9606.ENSP00000360891	9606.ENSP00000257570	0	0	0	0	0	0.16	0.9	0.703	0.972
IFIT2	STAT2	9606.ENSP00000360891	9606.ENSP00000315768	0	0	0	0	0	0	0.9	0.681	0.966
IFIT2	OAS2	9606.ENSP00000360891	9606.ENSP00000342278	0	0	0	0	0	0.327	0.9	0.721	0.979
IFIT2	IFIT3	9606.ENSP00000360891	9606.ENSP00000360883	0	0	0	0.945	0	0.875	0.9	0.954	0.987
IFIT2	IRF9	9606.ENSP00000360891	9606.ENSP00000380073	0	0	0	0	0	0	0.9	0.663	0.964
IFIT2	IRF7	9606.ENSP00000360891	9606.ENSP00000380697	0	0	0	0	0	0	0.9	0.693	0.968
IFIT2	OAS1	9606.ENSP00000360891	9606.ENSP00000388001	0	0	0	0	0	0	0.9	0.7	0.968
IFIT2	MX1	9606.ENSP00000360891	9606.ENSP00000381601	0	0	0	0	0	0	0.9	0.772	0.976
IFIT2	RSAD2	9606.ENSP00000360891	9606.ENSP00000371471	0	0	0	0	0	0.154	0.9	0.726	0.974
IFIT3	IRF1	9606.ENSP00000360883	9606.ENSP00000245414	0	0	0	0	0	0	0.9	0.608	0.959
IFIT3	OASL	9606.ENSP00000360883	9606.ENSP00000257570	0	0	0	0	0	0.16	0.9	0.712	0.973
IFIT3	STAT2	9606.ENSP00000360883	9606.ENSP00000315768	0	0	0	0	0	0	0.9	0.635	0.961
IFIT3	OAS2	9606.ENSP00000360883	9606.ENSP00000342278	0	0	0	0	0	0.329	0.9	0.702	0.978
IFIT3	IRF9	9606.ENSP00000360883	9606.ENSP00000380073	0	0	0	0	0	0	0.9	0.66	0.964
IFIT3	OAS1	9606.ENSP00000360883	9606.ENSP00000388001	0	0	0	0	0	0	0.9	0.71	0.969
IFIT3	IRF7	9606.ENSP00000360883	9606.ENSP00000380697	0	0	0	0	0	0	0.9	0.683	0.966
IFIT3	MX1	9606.ENSP00000360883	9606.ENSP00000381601	0	0	0	0	0	0	0.9	0.763	0.975
IFIT3	RSAD2	9606.ENSP00000360883	9606.ENSP00000371471	0	0	0	0	0	0.398	0.9	0.716	0.981
IRF1	IRF7	9606.ENSP00000245414	9606.ENSP00000380697	0	0	0	0.599	0	0	0.9	0.882	0.935
IRF1	OAS1	9606.ENSP00000245414	9606.ENSP00000388001	0	0	0	0	0	0	0.9	0.593	0.957
IRF1	OAS2	9606.ENSP00000245414	9606.ENSP00000342278	0	0	0	0	0	0	0.9	0.583	0.956
IRF1	OASL	9606.ENSP00000245414	9606.ENSP00000257570	0	0	0	0	0	0	0.9	0.606	0.958
IRF1	RSAD2	9606.ENSP00000245414	9606.ENSP00000371471	0	0	0	0	0	0	0.9	0.7	0.968
IRF1	IRF9	9606.ENSP00000245414	9606.ENSP00000380073	0	0	0	0.675	0	0.287	0.9	0.802	0.944
IRF1	MX1	9606.ENSP00000245414	9606.ENSP00000381601	0	0	0	0	0	0	0.9	0.745	0.973
IRF1	STAT2	9606.ENSP00000245414	9606.ENSP00000315768	0	0	0	0	0	0	0.9	0.786	0.977
IRF7	OASL	9606.ENSP00000380697	9606.ENSP00000257570	0	0	0	0	0	0	0.9	0.714	0.97
IRF7	STAT2	9606.ENSP00000380697	9606.ENSP00000315768	0	0	0	0	0	0	0.9	0.811	0.98
IRF7	OAS2	9606.ENSP00000380697	9606.ENSP00000342278	0	0	0	0	0	0	0.9	0.699	0.968
IRF7	RSAD2	9606.ENSP00000380697	9606.ENSP00000371471	0	0	0	0	0	0.182	0.9	0.836	0.985
IRF7	IRF9	9606.ENSP00000380697	9606.ENSP00000380073	0	0	0	0.633	0	0	0.9	0.847	0.93
IRF7	OAS1	9606.ENSP00000380697	9606.ENSP00000388001	0	0	0	0	0	0	0.9	0.71	0.969
IRF7	MX1	9606.ENSP00000380697	9606.ENSP00000381601	0	0	0	0	0	0	0.9	0.824	0.981
IRF9	OASL	9606.ENSP00000380073	9606.ENSP00000257570	0	0	0	0	0	0	0.9	0.544	0.952
IRF9	STAT2	9606.ENSP00000380073	9606.ENSP00000315768	0	0	0	0	0	0.917	0.8	0.991	0.999
IRF9	OAS2	9606.ENSP00000380073	9606.ENSP00000342278	0	0	0	0	0	0	0.9	0.632	0.961
IRF9	RSAD2	9606.ENSP00000380073	9606.ENSP00000371471	0	0	0	0	0	0	0.9	0.629	0.961
IRF9	OAS1	9606.ENSP00000380073	9606.ENSP00000388001	0	0	0	0	0	0	0.9	0.684	0.967
IRF9	MX1	9606.ENSP00000380073	9606.ENSP00000381601	0	0	0	0	0	0	0.9	0.744	0.973
MX1	OASL	9606.ENSP00000381601	9606.ENSP00000257570	0	0	0	0	0	0.149	0.9	0.794	0.981
MX1	STAT2	9606.ENSP00000381601	9606.ENSP00000315768	0	0	0	0	0	0	0.9	0.743	0.973
MX1	OAS2	9606.ENSP00000381601	9606.ENSP00000342278	0	0	0	0	0	0	0.9	0.796	0.978
MX1	RSAD2	9606.ENSP00000381601	9606.ENSP00000371471	0	0	0	0	0	0	0.9	0.831	0.982
MX1	OAS1	9606.ENSP00000381601	9606.ENSP00000388001	0	0	0	0	0	0	0.9	0.857	0.985
OAS1	STAT2	9606.ENSP00000388001	9606.ENSP00000315768	0	0	0	0	0	0	0.9	0.67	0.965
OAS1	OAS2	9606.ENSP00000388001	9606.ENSP00000342278	0	0	0	0.929	0	0	0.8	0.9	0.812
OAS1	RSAD2	9606.ENSP00000388001	9606.ENSP00000371471	0	0	0	0	0	0	0.9	0.71	0.969
OAS2	STAT2	9606.ENSP00000342278	9606.ENSP00000315768	0	0	0	0	0	0	0.9	0.615	0.959
OAS2	RSAD2	9606.ENSP00000342278	9606.ENSP00000371471	0	0	0	0	0	0.335	0.9	0.7	0.978
OASL	STAT2	9606.ENSP00000257570	9606.ENSP00000315768	0	0	0	0	0	0.07	0.9	0.517	0.951
OASL	RSAD2	9606.ENSP00000257570	9606.ENSP00000371471	0	0	0	0	0	0	0.9	0.715	0.97
RSAD2	STAT2	9606.ENSP00000371471	9606.ENSP00000315768	0	0	0	0	0	0	0.9	0.631	0.961
FBXW7	MAML1	9606.ENSP00000281708	9606.ENSP00000292599	0	0	0	0	0	0	0.65	0.419	0.787
FBXW7	RBPJ	9606.ENSP00000281708	9606.ENSP00000345206	0	0	0	0	0	0	0.65	0.47	0.806
FBXW7	NOTCH4	9606.ENSP00000281708	9606.ENSP00000364163	0	0	0	0	0	0.266	0.9	0.458	0.956
HES1	HEY2	9606.ENSP00000232424	9606.ENSP00000357348	0	0	0	0.7	0	0.281	0.65	0.541	0.778
HES1	HES5	9606.ENSP00000232424	9606.ENSP00000367714	0	0	0	0.785	0	0.105	0.8	0.614	0.837
HES1	MAML3	9606.ENSP00000232424	9606.ENSP00000421180	0	0	0	0	0	0	0.9	0.122	0.908
HES1	MAML1	9606.ENSP00000232424	9606.ENSP00000292599	0	0	0	0	0	0	0.9	0.359	0.933
HES1	NOTCH4	9606.ENSP00000232424	9606.ENSP00000364163	0	0	0	0	0	0.104	0.9	0.504	0.951
HES1	HEY1	9606.ENSP00000232424	9606.ENSP00000338272	0	0	0	0.681	0	0.675	0.9	0.821	0.974
HES1	RBPJ	9606.ENSP00000232424	9606.ENSP00000345206	0	0	0	0	0	0.289	0.9	0.742	0.98
HES5	MAML1	9606.ENSP00000367714	9606.ENSP00000292599	0	0	0	0	0	0	0.9	0.557	0.953
HES5	RBPJ	9606.ENSP00000367714	9606.ENSP00000345206	0	0	0	0	0	0	0.9	0.795	0.978
HES5	NOTCH4	9606.ENSP00000367714	9606.ENSP00000364163	0	0	0	0	0	0	0.9	0.627	0.961
HES5	MAML3	9606.ENSP00000367714	9606.ENSP00000421180	0	0	0	0	0	0	0.9	0.26	0.922
HEY1	MAML1	9606.ENSP00000338272	9606.ENSP00000292599	0	0	0	0	0	0	0.9	0.595	0.957
HEY1	MAML3	9606.ENSP00000338272	9606.ENSP00000421180	0	0	0	0	0	0	0.9	0.211	0.917
HEY1	HEY2	9606.ENSP00000338272	9606.ENSP00000357348	0	0	0	0.935	0	0.75	0.9	0.949	0.975
HEY1	NOTCH4	9606.ENSP00000338272	9606.ENSP00000364163	0	0	0	0	0	0.104	0.9	0.797	0.98
HEY1	RBPJ	9606.ENSP00000338272	9606.ENSP00000345206	0	0	0	0	0	0.067	0.9	0.841	0.983
HEY2	MAML1	9606.ENSP00000357348	9606.ENSP00000292599	0	0	0	0	0	0	0.9	0.465	0.944
HEY2	RBPJ	9606.ENSP00000357348	9606.ENSP00000345206	0	0	0	0	0	0.067	0.9	0.822	0.981
HEY2	MAML3	9606.ENSP00000357348	9606.ENSP00000421180	0	0	0	0	0	0	0.9	0.108	0.906
HEY2	NOTCH4	9606.ENSP00000357348	9606.ENSP00000364163	0	0	0	0	0	0.104	0.9	0.725	0.973
MAML1	MAML3	9606.ENSP00000292599	9606.ENSP00000421180	0	0	0	0.777	0	0.27	0.8	0.75	0.872
MAML1	NOTCH4	9606.ENSP00000292599	9606.ENSP00000364163	0	0	0	0	0	0.47	0.8	0.607	0.954
MAML1	RBPJ	9606.ENSP00000292599	9606.ENSP00000345206	0	0	0	0	0	0.978	0.9	0.988	0.999
MAML3	RBPJ	9606.ENSP00000421180	9606.ENSP00000345206	0	0	0	0	0	0.27	0.8	0.697	0.951
MAML3	NOTCH4	9606.ENSP00000421180	9606.ENSP00000364163	0	0	0	0	0	0.225	0.8	0.72	0.952
NCSTN	NOTCH4	9606.ENSP00000294785	9606.ENSP00000364163	0	0	0	0	0	0.142	0.9	0.478	0.951
NCSTN	PSEN1	9606.ENSP00000294785	9606.ENSP00000326366	0	0	0	0	0	0.989	0.9	0.994	0.999
NOTCH4	PSEN1	9606.ENSP00000364163	9606.ENSP00000326366	0	0	0	0	0	0.308	0.9	0.338	0.95
NOTCH4	RBPJ	9606.ENSP00000364163	9606.ENSP00000345206	0	0	0	0	0	0.354	0.8	0.886	0.984
PSEN1	RBPJ	9606.ENSP00000326366	9606.ENSP00000345206	0	0	0	0	0	0.187	0	0.718	0.761
ABCA1	APOE	9606.ENSP00000363868	9606.ENSP00000252486	0	0	0	0	0	0	0	0.983	0.983
ABCA1	NR1H2	9606.ENSP00000363868	9606.ENSP00000253727	0	0	0	0	0	0.681	0.8	0.838	0.988
ABCA1	SREBF1	9606.ENSP00000363868	9606.ENSP00000348069	0	0	0	0	0	0.068	0	0.778	0.784
ABCA1	RXRB	9606.ENSP00000363868	9606.ENSP00000363817	0	0	0	0	0	0.06	0.9	0.268	0.925
ABCA1	RXRA	9606.ENSP00000363868	9606.ENSP00000419692	0	0	0	0	0	0.06	0.8	0.424	0.882
ABCG1	APOE	9606.ENSP00000354995	9606.ENSP00000252486	0	0	0	0	0	0	0	0.921	0.921
ABCG1	NR1H2	9606.ENSP00000354995	9606.ENSP00000253727	0	0	0	0	0	0.075	0.9	0.742	0.974
ABCG1	SREBF1	9606.ENSP00000354995	9606.ENSP00000348069	0	0	0	0	0	0.068	0	0.739	0.746
ABCG1	RXRB	9606.ENSP00000354995	9606.ENSP00000363817	0	0	0	0	0	0.075	0.9	0.29	0.928
ABCG1	RXRA	9606.ENSP00000354995	9606.ENSP00000419692	0	0	0	0	0	0.075	0.9	0.488	0.948
ABCG5	NR1H2	9606.ENSP00000260645	9606.ENSP00000253727	0	0	0	0	0	0.075	0.9	0.78	0.977
ABCG5	RXRB	9606.ENSP00000260645	9606.ENSP00000363817	0	0	0	0	0	0.075	0.9	0.107	0.91
ABCG5	RXRA	9606.ENSP00000260645	9606.ENSP00000419692	0	0	0	0	0	0.075	0.9	0.204	0.919
ABCG5	ABCG8	9606.ENSP00000260645	9606.ENSP00000272286	0	0	0	0.746	0	0.961	0.9	0.994	0.996
ABCG8	NR1H2	9606.ENSP00000272286	9606.ENSP00000253727	0	0	0	0	0	0.075	0.9	0.761	0.975
ABCG8	RXRB	9606.ENSP00000272286	9606.ENSP00000363817	0	0	0	0	0	0.075	0.9	0.08	0.907
ABCG8	RXRA	9606.ENSP00000272286	9606.ENSP00000419692	0	0	0	0	0	0.075	0.9	0.14	0.913
APOE	RXRB	9606.ENSP00000252486	9606.ENSP00000363817	0	0	0	0	0	0	0.9	0.153	0.911
APOE	RXRA	9606.ENSP00000252486	9606.ENSP00000419692	0	0	0	0	0	0	0.9	0.255	0.922
APOE	NR1H2	9606.ENSP00000252486	9606.ENSP00000253727	0	0	0	0	0	0	0.9	0.562	0.954
FASN	NR1H2	9606.ENSP00000304592	9606.ENSP00000253727	0	0	0	0	0	0.27	0.9	0.45	0.956
FASN	RXRB	9606.ENSP00000304592	9606.ENSP00000363817	0	0	0	0	0	0	0.9	0.124	0.908
FASN	RXRA	9606.ENSP00000304592	9606.ENSP00000419692	0	0	0	0	0	0	0.9	0.331	0.93
FASN	SREBF1	9606.ENSP00000304592	9606.ENSP00000348069	0	0	0	0	0	0	0.9	0.923	0.991
NR1H2	SREBF1	9606.ENSP00000253727	9606.ENSP00000348069	0	0	0	0	0	0.27	0.9	0.725	0.978
NR1H2	RXRA	9606.ENSP00000253727	9606.ENSP00000419692	0	0	0	0.694	0	0.912	0.9	0.897	0.993
NR1H2	RXRG	9606.ENSP00000253727	9606.ENSP00000352900	0	0	0	0.681	0	0.946	0.9	0.632	0.995
NR1H2	RXRB	9606.ENSP00000253727	9606.ENSP00000363817	0	0	0	0.697	0	0.964	0.9	0.722	0.997
RXRA	SREBF1	9606.ENSP00000419692	9606.ENSP00000348069	0	0	0	0	0	0	0.9	0.569	0.955
RXRA	RXRG	9606.ENSP00000419692	9606.ENSP00000352900	0	0	0	0.971	0	0.273	0.9	0.834	0.926
RXRA	RXRB	9606.ENSP00000419692	9606.ENSP00000363817	0	0	0	0.968	0	0	0.9	0.838	0.902
RXRB	SREBF1	9606.ENSP00000363817	9606.ENSP00000348069	0	0	0	0	0	0	0.9	0.237	0.92
RXRB	RXRG	9606.ENSP00000363817	9606.ENSP00000352900	0	0	0	0.963	0	0	0.9	0.863	0.903
IFI27	MX2	9606.ENSP00000483430	9606.ENSP00000333657	0	0	0	0	0	0	0.9	0.519	0.949
IFI27	IFI6	9606.ENSP00000483430	9606.ENSP00000342513	0	0	0	0.835	0	0	0.9	0.902	0.914
IFI27	RNASEL	9606.ENSP00000483430	9606.ENSP00000356530	0	0	0	0	0	0	0.9	0.234	0.92
IFI27	IFIT1	9606.ENSP00000483430	9606.ENSP00000360869	0	0	0	0	0	0	0.9	0.715	0.97
IFI27	IFIT3	9606.ENSP00000483430	9606.ENSP00000360883	0	0	0	0	0	0	0.9	0.608	0.959
IFI27	ISG15	9606.ENSP00000483430	9606.ENSP00000368699	0	0	0	0	0	0	0.9	0.71	0.969
IFI27	RSAD2	9606.ENSP00000483430	9606.ENSP00000371471	0	0	0	0	0	0	0.9	0.706	0.969
IFI27	IRF7	9606.ENSP00000483430	9606.ENSP00000380697	0	0	0	0	0	0	0.9	0.601	0.958
IFI27	MX1	9606.ENSP00000483430	9606.ENSP00000381601	0	0	0	0	0	0	0.9	0.687	0.967
IFI27	OAS1	9606.ENSP00000483430	9606.ENSP00000388001	0	0	0	0	0	0	0.9	0.703	0.969
IFI6	MX2	9606.ENSP00000342513	9606.ENSP00000333657	0	0	0	0	0	0	0.9	0.507	0.948
IFI6	RNASEL	9606.ENSP00000342513	9606.ENSP00000356530	0	0	0	0	0	0	0.9	0.293	0.926
IFI6	IRF7	9606.ENSP00000342513	9606.ENSP00000380697	0	0	0	0	0	0	0.9	0.603	0.958
IFI6	RSAD2	9606.ENSP00000342513	9606.ENSP00000371471	0	0	0	0	0	0	0.9	0.653	0.963
IFI6	IFIT3	9606.ENSP00000342513	9606.ENSP00000360883	0	0	0	0	0	0	0.9	0.681	0.966
IFI6	OAS1	9606.ENSP00000342513	9606.ENSP00000388001	0	0	0	0	0	0	0.9	0.703	0.969
IFI6	IFIT1	9606.ENSP00000342513	9606.ENSP00000360869	0	0	0	0	0	0	0.9	0.707	0.969
IFI6	MX1	9606.ENSP00000342513	9606.ENSP00000381601	0	0	0	0	0	0	0.9	0.69	0.967
IFI6	ISG15	9606.ENSP00000342513	9606.ENSP00000368699	0	0	0	0	0	0	0.9	0.715	0.97
IFIT1	MX2	9606.ENSP00000360869	9606.ENSP00000333657	0	0	0	0	0	0	0.5	0.733	0.86
IFIT1	RNASEL	9606.ENSP00000360869	9606.ENSP00000356530	0	0	0	0	0	0.078	0.9	0.601	0.96
IFIT1	IRF7	9606.ENSP00000360869	9606.ENSP00000380697	0	0	0	0	0	0	0.9	0.795	0.978
IFIT1	ISG15	9606.ENSP00000360869	9606.ENSP00000368699	0	0	0	0	0	0.16	0.6	0.884	0.957
IFIT1	MX1	9606.ENSP00000360869	9606.ENSP00000381601	0	0	0	0	0	0	0.5	0.883	0.939
IFIT1	OAS1	9606.ENSP00000360869	9606.ENSP00000388001	0	0	0	0	0	0	0.9	0.802	0.979
IFIT1	RSAD2	9606.ENSP00000360869	9606.ENSP00000371471	0	0	0	0	0	0.154	0.9	0.833	0.984
IFIT1	IFIT3	9606.ENSP00000360869	9606.ENSP00000360883	0	0	0	0.898	0	0.974	0.9	0.965	0.997
IFIT3	MX2	9606.ENSP00000360883	9606.ENSP00000333657	0	0	0	0	0	0	0.9	0.695	0.968
IFIT3	RNASEL	9606.ENSP00000360883	9606.ENSP00000356530	0	0	0	0	0	0.078	0.9	0.402	0.94
IFIT3	OAS1	9606.ENSP00000360883	9606.ENSP00000388001	0	0	0	0	0	0	0.9	0.71	0.969
IFIT3	IRF7	9606.ENSP00000360883	9606.ENSP00000380697	0	0	0	0	0	0	0.9	0.683	0.966
IFIT3	MX1	9606.ENSP00000360883	9606.ENSP00000381601	0	0	0	0	0	0	0.9	0.763	0.975
IFIT3	ISG15	9606.ENSP00000360883	9606.ENSP00000368699	0	0	0	0	0	0.16	0.9	0.792	0.981
IFIT3	RSAD2	9606.ENSP00000360883	9606.ENSP00000371471	0	0	0	0	0	0.398	0.9	0.716	0.981
IRF7	MX2	9606.ENSP00000380697	9606.ENSP00000333657	0	0	0	0	0	0	0.9	0.748	0.973
IRF7	RNASEL	9606.ENSP00000380697	9606.ENSP00000356530	0	0	0	0	0	0.056	0.9	0.627	0.961
IRF7	ISG15	9606.ENSP00000380697	9606.ENSP00000368699	0	0	0	0	0	0	0.9	0.844	0.983
IRF7	RSAD2	9606.ENSP00000380697	9606.ENSP00000371471	0	0	0	0	0	0.182	0.9	0.836	0.985
IRF7	OAS1	9606.ENSP00000380697	9606.ENSP00000388001	0	0	0	0	0	0	0.9	0.71	0.969
IRF7	MX1	9606.ENSP00000380697	9606.ENSP00000381601	0	0	0	0	0	0	0.9	0.824	0.981
ISG15	MX2	9606.ENSP00000368699	9606.ENSP00000333657	0	0	0	0	0	0.149	0.6	0.806	0.928
ISG15	RNASEL	9606.ENSP00000368699	9606.ENSP00000356530	0	0	0	0	0	0.21	0.9	0.666	0.971
ISG15	MX1	9606.ENSP00000368699	9606.ENSP00000381601	0	0	0	0	0	0.149	0.6	0.88	0.955
ISG15	OAS1	9606.ENSP00000368699	9606.ENSP00000388001	0	0	0	0	0	0	0.9	0.804	0.979
ISG15	RSAD2	9606.ENSP00000368699	9606.ENSP00000371471	0	0	0	0	0	0	0.9	0.883	0.987
MX1	MX2	9606.ENSP00000381601	9606.ENSP00000333657	0	0	0	0.961	0	0	0.8	0.903	0.807
MX1	RNASEL	9606.ENSP00000381601	9606.ENSP00000356530	0	0	0	0	0	0.102	0.9	0.698	0.97
MX1	RSAD2	9606.ENSP00000381601	9606.ENSP00000371471	0	0	0	0	0	0	0.9	0.831	0.982
MX1	OAS1	9606.ENSP00000381601	9606.ENSP00000388001	0	0	0	0	0	0	0.9	0.857	0.985
MX2	RNASEL	9606.ENSP00000333657	9606.ENSP00000356530	0	0	0	0	0	0.102	0.9	0.488	0.95
MX2	OAS1	9606.ENSP00000333657	9606.ENSP00000388001	0	0	0	0	0	0	0.9	0.71	0.969
MX2	RSAD2	9606.ENSP00000333657	9606.ENSP00000371471	0	0	0	0	0	0	0.9	0.77	0.976
OAS1	RNASEL	9606.ENSP00000388001	9606.ENSP00000356530	0	0	0	0	0	0	0.9	0.852	0.984
OAS1	RSAD2	9606.ENSP00000388001	9606.ENSP00000371471	0	0	0	0	0	0	0.9	0.71	0.969
RNASEL	RSAD2	9606.ENSP00000356530	9606.ENSP00000371471	0	0	0	0	0	0.056	0.9	0.673	0.966
CEPT1	EPT1	9606.ENSP00000441980	9606.ENSP00000260585	0	0	0	0.685	0	0	0.9	0.69	0.921
CEPT1	PLD2	9606.ENSP00000441980	9606.ENSP00000263088	0	0	0	0	0	0	0.9	0.29	0.926
CEPT1	LPCAT4	9606.ENSP00000441980	9606.ENSP00000317300	0	0	0	0	0	0	0.9	0.373	0.934
CEPT1	PLD1	9606.ENSP00000441980	9606.ENSP00000342793	0	0	0	0	0	0	0.9	0.313	0.928
CEPT1	TMEM189-UBE2V1	9606.ENSP00000441980	9606.ENSP00000344166	0	0	0	0	0	0	0.9	0	0.9
CEPT1	PLD4	9606.ENSP00000441980	9606.ENSP00000376372	0	0	0	0	0	0	0.9	0	0.9
CEPT1	PLD3	9606.ENSP00000441980	9606.ENSP00000387050	0	0	0	0	0	0	0.9	0	0.9
EPT1	TMEM189-UBE2V1	9606.ENSP00000260585	9606.ENSP00000344166	0	0	0	0	0	0	0.9	0	0.9
EPT1	PLD4	9606.ENSP00000260585	9606.ENSP00000376372	0	0	0	0	0	0	0.9	0	0.9
EPT1	PLD3	9606.ENSP00000260585	9606.ENSP00000387050	0	0	0	0	0	0	0.9	0	0.9
EPT1	PLD1	9606.ENSP00000260585	9606.ENSP00000342793	0	0	0	0	0	0	0.9	0.19	0.915
EPT1	PLD2	9606.ENSP00000260585	9606.ENSP00000263088	0	0	0	0	0	0	0.9	0.211	0.917
EPT1	LPCAT4	9606.ENSP00000260585	9606.ENSP00000317300	0	0	0	0	0	0	0.9	0.287	0.925
LPCAT4	PLD2	9606.ENSP00000317300	9606.ENSP00000263088	0	0	0	0	0	0.059	0.9	0.107	0.908
LPCAT4	PLD4	9606.ENSP00000317300	9606.ENSP00000376372	0	0	0	0	0	0	0.9	0	0.9
LPCAT4	TMEM189-UBE2V1	9606.ENSP00000317300	9606.ENSP00000344166	0	0	0	0	0	0	0.9	0	0.9
LPCAT4	PLD3	9606.ENSP00000317300	9606.ENSP00000387050	0	0	0	0	0	0	0.9	0	0.9
LPCAT4	PLD1	9606.ENSP00000317300	9606.ENSP00000342793	0	0	0	0	0	0.059	0.9	0.107	0.908
PLD1	PLD2	9606.ENSP00000342793	9606.ENSP00000263088	0	0	0	0.955	0	0	0.8	0.836	0.807
PLD1	PLD3	9606.ENSP00000342793	9606.ENSP00000387050	0	0	0	0	0	0	0.8	0.233	0.84
PLD1	PLD4	9606.ENSP00000342793	9606.ENSP00000376372	0	0	0	0	0	0	0.8	0.319	0.857
PLD1	TMEM189-UBE2V1	9606.ENSP00000342793	9606.ENSP00000344166	0	0	0	0	0	0	0.9	0	0.9
PLD2	TMEM189-UBE2V1	9606.ENSP00000263088	9606.ENSP00000344166	0	0	0	0	0	0	0.9	0	0.9
PLD2	PLD4	9606.ENSP00000263088	9606.ENSP00000376372	0	0	0	0	0	0	0.8	0.65	0.927
PLD2	PLD3	9606.ENSP00000263088	9606.ENSP00000387050	0	0	0	0	0	0	0.8	0.795	0.957
PLD3	TMEM189-UBE2V1	9606.ENSP00000387050	9606.ENSP00000344166	0	0	0	0	0	0	0.9	0	0.9
PLD3	PLD4	9606.ENSP00000387050	9606.ENSP00000376372	0	0	0	0.912	0	0	0.8	0.702	0.812
PLD4	TMEM189-UBE2V1	9606.ENSP00000376372	9606.ENSP00000344166	0	0	0	0	0	0	0.9	0	0.9
STUB1	TMEM189-UBE2V1	9606.ENSP00000219548	9606.ENSP00000344166	0	0	0	0	0	0.8	0	0.083	0.808
STUB1	UBE2N	9606.ENSP00000219548	9606.ENSP00000316176	0	0	0	0	0	0.981	0.72	0.983	0.999
TMEM189-UBE2V1	UBE2K	9606.ENSP00000344166	9606.ENSP00000261427	0	0	0	0.64	0	0.774	0	0.601	0.822
TMEM189-UBE2V1	UBE2N	9606.ENSP00000344166	9606.ENSP00000316176	0	0	0	0	0	0.896	0	0.537	0.95
UBE2K	UBE2N	9606.ENSP00000261427	9606.ENSP00000316176	0	0	0	0.912	0	0.773	0.9	0.931	0.978
PIK3C2A	PLEKHA4	9606.ENSP00000265970	9606.ENSP00000263265	0	0	0	0	0	0.27	0	0.674	0.752
ANK3	PKP2	9606.ENSP00000280772	9606.ENSP00000070846	0	0	0	0	0	0.074	0	0.749	0.757
ANK3	GJA1	9606.ENSP00000280772	9606.ENSP00000282561	0	0	0	0	0	0	0	0.742	0.742
ANK3	SCN4B	9606.ENSP00000280772	9606.ENSP00000322460	0	0	0	0	0	0	0.6	0.394	0.747
ANK3	DMD	9606.ENSP00000280772	9606.ENSP00000354923	0	0	0	0	0	0.139	0	0.811	0.83
ANK3	SCN1B	9606.ENSP00000280772	9606.ENSP00000396915	0	0	0	0	0	0.462	0.6	0.455	0.872
ANK3	SCN5A	9606.ENSP00000280772	9606.ENSP00000410257	0	0	0	0	0	0.284	0.6	0.988	0.996
CALM1	CALM3	9606.ENSP00000349467	9606.ENSP00000291295	0	0	0	0.985	0	0.8	0	0.402	0.801
CALM1	SCN5A	9606.ENSP00000349467	9606.ENSP00000410257	0	0	0	0	0	0.978	0	0.717	0.993
CALM3	SCN5A	9606.ENSP00000291295	9606.ENSP00000410257	0	0	0	0	0	0.982	0	0.568	0.992
DLG1	DMD	9606.ENSP00000345731	9606.ENSP00000354923	0	0	0	0	0	0.08	0	0.71	0.721
DLG1	SCN5A	9606.ENSP00000345731	9606.ENSP00000410257	0	0	0	0	0	0.339	0	0.982	0.987
DMD	SNTA1	9606.ENSP00000354923	9606.ENSP00000217381	0	0	0	0	0	0.913	0.72	0.988	0.999
DMD	SCN5A	9606.ENSP00000354923	9606.ENSP00000410257	0	0	0	0	0	0	0	0.986	0.986
GJA1	PKP2	9606.ENSP00000282561	9606.ENSP00000070846	0	0	0	0	0	0.182	0	0.989	0.99
GJA1	SCN5A	9606.ENSP00000282561	9606.ENSP00000410257	0	0	0	0	0	0.058	0	0.984	0.984
PKP2	SCN5A	9606.ENSP00000070846	9606.ENSP00000410257	0	0	0	0	0	0	0	0.983	0.983
SCN1B	SCN4B	9606.ENSP00000396915	9606.ENSP00000322460	0	0	0	0	0	0.27	0.9	0.881	0.99
SCN1B	SCN5A	9606.ENSP00000396915	9606.ENSP00000410257	0	0	0	0	0	0	0.8	0.874	0.973
SCN4B	SNTA1	9606.ENSP00000322460	9606.ENSP00000217381	0	0	0	0	0	0	0	0.779	0.779
SCN4B	SCN5A	9606.ENSP00000322460	9606.ENSP00000410257	0	0	0	0	0	0	0.8	0.832	0.965
SCN5A	SNTA1	9606.ENSP00000410257	9606.ENSP00000217381	0	0	0	0	0	0.501	0	0.97	0.984
SLC22A5	SLC47A1	9606.ENSP00000245407	9606.ENSP00000270570	0	0	0	0	0	0	0	0.7	0.7
SLC1A7	SLC36A2	9606.ENSP00000478639	9606.ENSP00000334223	0	0	0	0	0	0.078	0	0.815	0.822
SLC1A7	SLC6A20	9606.ENSP00000478639	9606.ENSP00000346298	0	0	0	0	0	0	0	0.821	0.821
SLC36A2	SLC6A20	9606.ENSP00000334223	9606.ENSP00000346298	0	0	0	0	0	0	0	0.93	0.93
SLC6A20	XYLT2	9606.ENSP00000346298	9606.ENSP00000017003	0	0	0	0	0	0	0	0.764	0.764
SLC6A20	XYLT1	9606.ENSP00000346298	9606.ENSP00000261381	0	0	0	0	0	0	0	0.701	0.701
XYLT1	XYLT2	9606.ENSP00000261381	9606.ENSP00000017003	0	0	0	0.954	0	0.168	0.8	0.92	0.833
CTSB	CTSL	9606.ENSP00000345672	9606.ENSP00000345344	0	0	0	0.652	0	0.157	0.8	0.954	0.882
CTSB	TLR7	9606.ENSP00000345672	9606.ENSP00000370034	0	0	0	0	0	0	0.9	0.278	0.924
CTSL	TLR7	9606.ENSP00000345344	9606.ENSP00000370034	0	0	0	0	0	0	0.9	0.202	0.916
IRAK1	UBE2N	9606.ENSP00000358997	9606.ENSP00000316176	0	0	0	0	0	0.067	0.9	0.568	0.956
IRAK1	UBE2V1	9606.ENSP00000358997	9606.ENSP00000340305	0	0	0	0	0	0	0.9	0.562	0.954
IRAK1	TLR7	9606.ENSP00000358997	9606.ENSP00000370034	0	0	0	0	0	0.128	0.9	0.754	0.976
IRAK1	IRF7	9606.ENSP00000358997	9606.ENSP00000380697	0	0	0	0	0	0.612	0.8	0.892	0.99
IRAK1	MYD88	9606.ENSP00000358997	9606.ENSP00000401399	0	0	0	0	0	0.977	0.9	0.994	0.999
IRAK1	TRAF6	9606.ENSP00000358997	9606.ENSP00000433623	0	0	0	0	0	0.959	0.9	0.993	0.999
IRF7	UBE2N	9606.ENSP00000380697	9606.ENSP00000316176	0	0	0	0	0	0	0.9	0.293	0.926
IRF7	UBE2V1	9606.ENSP00000380697	9606.ENSP00000340305	0	0	0	0	0	0	0.9	0.283	0.925
IRF7	TLR7	9606.ENSP00000380697	9606.ENSP00000370034	0	0	0	0	0	0	0.6	0.862	0.942
IRF7	MYD88	9606.ENSP00000380697	9606.ENSP00000401399	0	0	0	0	0	0.686	0.6	0.99	0.998
IRF7	TRAF6	9606.ENSP00000380697	9606.ENSP00000433623	0	0	0	0	0	0.881	0.8	0.988	0.999
MYD88	UNC93B1	9606.ENSP00000401399	9606.ENSP00000227471	0	0	0	0	0	0	0	0.819	0.819
MYD88	UBE2N	9606.ENSP00000401399	9606.ENSP00000316176	0	0	0	0	0	0.057	0.9	0.649	0.964
MYD88	UBE2V1	9606.ENSP00000401399	9606.ENSP00000340305	0	0	0	0	0	0	0.9	0.502	0.948
MYD88	TLR7	9606.ENSP00000401399	9606.ENSP00000370034	0	0	0	0	0	0.353	0.9	0.99	0.999
MYD88	TRAF6	9606.ENSP00000401399	9606.ENSP00000433623	0	0	0	0	0	0.887	0.9	0.995	0.999
TLR7	UNC93B1	9606.ENSP00000370034	9606.ENSP00000227471	0	0	0	0	0	0	0.6	0.988	0.995
TLR7	TRPA1	9606.ENSP00000370034	9606.ENSP00000262209	0	0	0	0	0	0.068	0	0.922	0.924
TLR7	UBE2N	9606.ENSP00000370034	9606.ENSP00000316176	0	0	0	0	0	0.066	0.9	0.275	0.926
TLR7	UBE2V1	9606.ENSP00000370034	9606.ENSP00000340305	0	0	0	0	0	0.057	0.9	0.263	0.924
TLR7	TRAF6	9606.ENSP00000370034	9606.ENSP00000433623	0	0	0	0	0	0.058	0.9	0.711	0.97
TRAF6	UBE2N	9606.ENSP00000433623	9606.ENSP00000316176	0	0	0	0	0	0.991	0.9	0.993	0.999
TRAF6	UBE2V1	9606.ENSP00000433623	9606.ENSP00000340305	0	0	0	0	0	0.888	0.9	0.938	0.999
UBE2N	UBE2V1	9606.ENSP00000316176	9606.ENSP00000340305	0	0	0	0	0	0.946	0.9	0.99	0.999
LSR	TMEM181	9606.ENSP00000480821	9606.ENSP00000356057	0	0	0	0	0	0	0	0.719	0.719
SGMS1	TMEM181	9606.ENSP00000354829	9606.ENSP00000356057	0	0	0	0	0	0	0	0.76	0.76
TAGAP	TMEM181	9606.ENSP00000356033	9606.ENSP00000356057	0	0	0	0	0	0	0	0.703	0.703
CEPT1	EPT1	9606.ENSP00000441980	9606.ENSP00000260585	0	0	0	0.685	0	0	0.9	0.69	0.921
CEPT1	PLD2	9606.ENSP00000441980	9606.ENSP00000263088	0	0	0	0	0	0	0.9	0.29	0.926
CEPT1	LPCAT4	9606.ENSP00000441980	9606.ENSP00000317300	0	0	0	0	0	0	0.9	0.373	0.934
CEPT1	PLD1	9606.ENSP00000441980	9606.ENSP00000342793	0	0	0	0	0	0	0.9	0.313	0.928
CEPT1	TMEM189-UBE2V1	9606.ENSP00000441980	9606.ENSP00000344166	0	0	0	0	0	0	0.9	0	0.9
CEPT1	TMEM189	9606.ENSP00000441980	9606.ENSP00000360715	0	0	0	0	0	0	0.9	0	0.9
CEPT1	PLD4	9606.ENSP00000441980	9606.ENSP00000376372	0	0	0	0	0	0	0.9	0	0.9
CEPT1	PLD3	9606.ENSP00000441980	9606.ENSP00000387050	0	0	0	0	0	0	0.9	0	0.9
EPT1	TMEM189	9606.ENSP00000260585	9606.ENSP00000360715	0	0	0	0	0	0	0.9	0	0.9
EPT1	TMEM189-UBE2V1	9606.ENSP00000260585	9606.ENSP00000344166	0	0	0	0	0	0	0.9	0	0.9
EPT1	PLD4	9606.ENSP00000260585	9606.ENSP00000376372	0	0	0	0	0	0	0.9	0	0.9
EPT1	PLD3	9606.ENSP00000260585	9606.ENSP00000387050	0	0	0	0	0	0	0.9	0	0.9
EPT1	PLD1	9606.ENSP00000260585	9606.ENSP00000342793	0	0	0	0	0	0	0.9	0.19	0.915
EPT1	PLD2	9606.ENSP00000260585	9606.ENSP00000263088	0	0	0	0	0	0	0.9	0.211	0.917
EPT1	LPCAT4	9606.ENSP00000260585	9606.ENSP00000317300	0	0	0	0	0	0	0.9	0.287	0.925
LPCAT4	PLD2	9606.ENSP00000317300	9606.ENSP00000263088	0	0	0	0	0	0.059	0.9	0.107	0.908
LPCAT4	TMEM189	9606.ENSP00000317300	9606.ENSP00000360715	0	0	0	0	0	0	0.9	0	0.9
LPCAT4	PLD4	9606.ENSP00000317300	9606.ENSP00000376372	0	0	0	0	0	0	0.9	0	0.9
LPCAT4	TMEM189-UBE2V1	9606.ENSP00000317300	9606.ENSP00000344166	0	0	0	0	0	0	0.9	0	0.9
LPCAT4	PLD3	9606.ENSP00000317300	9606.ENSP00000387050	0	0	0	0	0	0	0.9	0	0.9
LPCAT4	PLD1	9606.ENSP00000317300	9606.ENSP00000342793	0	0	0	0	0	0.059	0.9	0.107	0.908
PLD1	PLD2	9606.ENSP00000342793	9606.ENSP00000263088	0	0	0	0.955	0	0	0.8	0.836	0.807
PLD1	PLD3	9606.ENSP00000342793	9606.ENSP00000387050	0	0	0	0	0	0	0.8	0.233	0.84
PLD1	PLD4	9606.ENSP00000342793	9606.ENSP00000376372	0	0	0	0	0	0	0.8	0.319	0.857
PLD1	TMEM189-UBE2V1	9606.ENSP00000342793	9606.ENSP00000344166	0	0	0	0	0	0	0.9	0	0.9
PLD1	TMEM189	9606.ENSP00000342793	9606.ENSP00000360715	0	0	0	0	0	0	0.9	0	0.9
PLD2	TMEM189	9606.ENSP00000263088	9606.ENSP00000360715	0	0	0	0	0	0	0.9	0	0.9
PLD2	TMEM189-UBE2V1	9606.ENSP00000263088	9606.ENSP00000344166	0	0	0	0	0	0	0.9	0	0.9
PLD2	PLD4	9606.ENSP00000263088	9606.ENSP00000376372	0	0	0	0	0	0	0.8	0.65	0.927
PLD2	PLD3	9606.ENSP00000263088	9606.ENSP00000387050	0	0	0	0	0	0	0.8	0.795	0.957
PLD3	TMEM189-UBE2V1	9606.ENSP00000387050	9606.ENSP00000344166	0	0	0	0	0	0	0.9	0	0.9
PLD3	TMEM189	9606.ENSP00000387050	9606.ENSP00000360715	0	0	0	0	0	0	0.9	0	0.9
PLD3	PLD4	9606.ENSP00000387050	9606.ENSP00000376372	0	0	0	0.912	0	0	0.8	0.702	0.812
PLD4	TMEM189-UBE2V1	9606.ENSP00000376372	9606.ENSP00000344166	0	0	0	0	0	0	0.9	0	0.9
PLD4	TMEM189	9606.ENSP00000376372	9606.ENSP00000360715	0	0	0	0	0	0	0.9	0	0.9
TMEM189	TMEM189-UBE2V1	9606.ENSP00000360715	9606.ENSP00000344166	0	0	0	0.982	0	0	0.8	0.437	0.801
ACE2	TMPRSS2	9606.ENSP00000389326	9606.ENSP00000381588	0	0	0	0	0	0.27	0	0.866	0.898
AR	ETV1	9606.ENSP00000363822	9606.ENSP00000405327	0	0	0	0	0	0.062	0	0.772	0.776
AR	ERG	9606.ENSP00000363822	9606.ENSP00000414150	0	0	0	0	0	0.682	0	0.403	0.802
AR	NKX3-1	9606.ENSP00000363822	9606.ENSP00000370253	0	0	0	0	0	0.143	0	0.906	0.916
AR	TMPRSS2	9606.ENSP00000363822	9606.ENSP00000381588	0	0	0	0	0	0.873	0	0.875	0.983
ERG	TMPRSS2	9606.ENSP00000414150	9606.ENSP00000381588	0	0	0	0	0	0.28	0	0.67	0.752
ETV1	TMPRSS2	9606.ENSP00000405327	9606.ENSP00000381588	0	0	0	0	0	0	0	0.832	0.832
ETV4	TMPRSS2	9606.ENSP00000321835	9606.ENSP00000381588	0	0	0	0	0	0	0	0.739	0.739
NKX3-1	TMPRSS2	9606.ENSP00000370253	9606.ENSP00000381588	0	0	0	0	0	0	0	0.82	0.82
PARP1	PRKDC	9606.ENSP00000355759	9606.ENSP00000313420	0	0	0	0	0	0.498	0	0.979	0.989
PARP1	TMPRSS2	9606.ENSP00000355759	9606.ENSP00000381588	0	0	0	0	0	0.068	0	0.832	0.836
PRKDC	TMPRSS2	9606.ENSP00000313420	9606.ENSP00000381588	0	0	0	0	0	0.28	0	0.777	0.833
SLC45A3	TMPRSS2	9606.ENSP00000356113	9606.ENSP00000381588	0	0	0	0	0	0	0	0.796	0.796
TMPRSS2	TMPRSS4	9606.ENSP00000381588	9606.ENSP00000477949	0	0	0	0.831	0	0	0.8	0.929	0.831
CD40	TRAF2	9606.ENSP00000361359	9606.ENSP00000247668	0	0	0	0	0	0.978	0.9	0.985	0.999
CD40	TNFRSF13B	9606.ENSP00000361359	9606.ENSP00000261652	0	0	0	0	0	0	0	0.729	0.729
CD40	TNFRSF13C	9606.ENSP00000361359	9606.ENSP00000291232	0	0	0	0	0	0	0.6	0.744	0.893
CD40	CD40LG	9606.ENSP00000361359	9606.ENSP00000359663	0	0	0	0	0	0.932	0.9	0.995	0.999
CD40	TNFSF13B	9606.ENSP00000361359	9606.ENSP00000365048	0	0	0	0	0	0	0.6	0.839	0.933
CD40	TNF	9606.ENSP00000361359	9606.ENSP00000398698	0	0	0	0	0	0	0.6	0.864	0.943
CD40	TRAF6	9606.ENSP00000361359	9606.ENSP00000433623	0	0	0	0	0	0.918	0.9	0.989	0.999
CD40	TRAF3	9606.ENSP00000361359	9606.ENSP00000454207	0	0	0	0	0	0.983	0.9	0.99	0.999
CD40LG	LTBR	9606.ENSP00000359663	9606.ENSP00000228918	0	0	0	0	0	0	0.6	0.518	0.798
CD40LG	TRAF2	9606.ENSP00000359663	9606.ENSP00000247668	0	0	0	0	0	0.281	0.9	0.654	0.972
CD40LG	TNFRSF13C	9606.ENSP00000359663	9606.ENSP00000291232	0	0	0	0	0	0	0.6	0.676	0.864
CD40LG	TNFSF13B	9606.ENSP00000359663	9606.ENSP00000365048	0	0	0	0	0	0	0.6	0.799	0.916
CD40LG	TNF	9606.ENSP00000359663	9606.ENSP00000398698	0	0	0	0	0	0	0.6	0.822	0.925
CD40LG	TRAF6	9606.ENSP00000359663	9606.ENSP00000433623	0	0	0	0	0	0.056	0.9	0.556	0.954
CD40LG	TRAF3	9606.ENSP00000359663	9606.ENSP00000454207	0	0	0	0	0	0.056	0.9	0.574	0.956
LTBR	TNFSF13B	9606.ENSP00000228918	9606.ENSP00000365048	0	0	0	0	0	0	0.6	0.618	0.84
LTBR	TNFRSF13C	9606.ENSP00000228918	9606.ENSP00000291232	0	0	0	0	0	0	0.6	0.687	0.869
LTBR	TNF	9606.ENSP00000228918	9606.ENSP00000398698	0	0	0	0	0	0.27	0.6	0.812	0.94
LTBR	TRAF2	9606.ENSP00000228918	9606.ENSP00000247668	0	0	0	0	0	0.886	0.8	0.396	0.985
LTBR	TRAF3	9606.ENSP00000228918	9606.ENSP00000454207	0	0	0	0	0	0.882	0.8	0.984	0.999
TNF	TRAF2	9606.ENSP00000398698	9606.ENSP00000247668	0	0	0	0	0	0.897	0.9	0.854	0.998
TNF	TNFRSF13C	9606.ENSP00000398698	9606.ENSP00000291232	0	0	0	0	0	0	0.6	0.624	0.843
TNF	TNFSF13B	9606.ENSP00000398698	9606.ENSP00000365048	0	0	0	0	0	0	0.6	0.755	0.897
TNF	TRAF3	9606.ENSP00000398698	9606.ENSP00000454207	0	0	0	0	0	0.27	0.6	0.617	0.878
TNF	TRAF6	9606.ENSP00000398698	9606.ENSP00000433623	0	0	0	0	0	0.27	0.9	0.875	0.99
TNFRSF13B	TNFRSF17	9606.ENSP00000261652	9606.ENSP00000053243	0	0	0	0	0	0	0	0.987	0.987
TNFRSF13B	TRAF2	9606.ENSP00000261652	9606.ENSP00000247668	0	0	0	0	0	0.684	0.9	0.75	0.991
TNFRSF13B	TRAF3	9606.ENSP00000261652	9606.ENSP00000454207	0	0	0	0	0	0.281	0	0.795	0.846
TNFRSF13B	TRAF6	9606.ENSP00000261652	9606.ENSP00000433623	0	0	0	0	0	0.501	0.9	0.515	0.973
TNFRSF13B	TNFRSF13C	9606.ENSP00000261652	9606.ENSP00000291232	0	0	0	0	0	0	0	0.99	0.99
TNFRSF13B	TNFSF13B	9606.ENSP00000261652	9606.ENSP00000365048	0	0	0	0	0	0.791	0.9	0.989	0.999
TNFRSF13C	TNFRSF17	9606.ENSP00000291232	9606.ENSP00000053243	0	0	0	0	0	0	0	0.977	0.977
TNFRSF13C	TRAF2	9606.ENSP00000291232	9606.ENSP00000247668	0	0	0	0	0	0.345	0.8	0.373	0.91
TNFRSF13C	TRAF6	9606.ENSP00000291232	9606.ENSP00000433623	0	0	0	0	0	0.182	0	0.827	0.852
TNFRSF13C	TRAF3	9606.ENSP00000291232	9606.ENSP00000454207	0	0	0	0	0	0.822	0.8	0.988	0.999
TNFRSF13C	TNFSF13B	9606.ENSP00000291232	9606.ENSP00000365048	0	0	0	0	0	0.969	0.8	0.99	0.999
TNFRSF17	TRAF6	9606.ENSP00000053243	9606.ENSP00000433623	0	0	0	0	0	0.283	0.9	0.22	0.939
TNFRSF17	TRAF3	9606.ENSP00000053243	9606.ENSP00000454207	0	0	0	0	0	0.32	0.9	0.495	0.962
TNFRSF17	TNFSF13B	9606.ENSP00000053243	9606.ENSP00000365048	0	0	0	0	0	0.949	0.9	0.989	0.999
TNFSF13B	TRAF2	9606.ENSP00000365048	9606.ENSP00000247668	0	0	0	0	0	0	0.9	0.343	0.931
TNFSF13B	TRAF6	9606.ENSP00000365048	9606.ENSP00000433623	0	0	0	0	0	0	0.9	0.461	0.943
TNFSF13B	TRAF3	9606.ENSP00000365048	9606.ENSP00000454207	0	0	0	0	0	0	0.9	0.726	0.971
TRAF2	TRAF3	9606.ENSP00000247668	9606.ENSP00000454207	0	0	0	0.843	0	0.81	0.9	0.978	0.983
TRAF2	TRAF6	9606.ENSP00000247668	9606.ENSP00000433623	0	0	0	0.735	0	0.872	0.9	0.704	0.989
TRAF3	TRAF6	9606.ENSP00000454207	9606.ENSP00000433623	0	0	0	0.713	0	0.182	0.9	0.991	0.938
IFNAR1	STAT3	9606.ENSP00000270139	9606.ENSP00000264657	0	0	0	0	0	0.281	0	0.719	0.789
IFNAR1	SOCS3	9606.ENSP00000270139	9606.ENSP00000330341	0	0	0	0	0	0	0.6	0.642	0.85
IFNAR1	SOCS1	9606.ENSP00000270139	9606.ENSP00000329418	0	0	0	0	0	0.27	0.6	0.757	0.922
IFNAR1	STAT1	9606.ENSP00000270139	9606.ENSP00000354394	0	0	0	0	0	0.345	0.9	0.984	0.998
IFNAR1	TYK2	9606.ENSP00000270139	9606.ENSP00000431885	0	0	0	0	0	0.972	0.9	0.99	0.999
IFNAR1	IFNAR2	9606.ENSP00000270139	9606.ENSP00000343957	0	0	0	0	0	0.944	0.9	0.989	0.999
IFNAR1	STAT2	9606.ENSP00000270139	9606.ENSP00000315768	0	0	0	0	0	0.873	0.9	0.986	0.999
IFNAR2	IL10RB	9606.ENSP00000343957	9606.ENSP00000290200	0	0	0	0	0	0	0	0.701	0.701
IFNAR2	STAT2	9606.ENSP00000343957	9606.ENSP00000315768	0	0	0	0	0	0.837	0.9	0.963	0.999
IFNAR2	SOCS1	9606.ENSP00000343957	9606.ENSP00000329418	0	0	0	0	0	0	0.6	0.587	0.827
IFNAR2	SOCS3	9606.ENSP00000343957	9606.ENSP00000330341	0	0	0	0	0	0	0.6	0.394	0.747
IFNAR2	STAT1	9606.ENSP00000343957	9606.ENSP00000354394	0	0	0	0	0	0.501	0.9	0.918	0.995
IFNAR2	TYK2	9606.ENSP00000343957	9606.ENSP00000431885	0	0	0	0	0	0.213	0.9	0.988	0.998
IL10RA	STAT1	9606.ENSP00000227752	9606.ENSP00000354394	0	0	0	0	0	0.117	0.9	0.658	0.967
IL10RA	TYK2	9606.ENSP00000227752	9606.ENSP00000431885	0	0	0	0	0	0	0.9	0.853	0.984
IL10RA	STAT3	9606.ENSP00000227752	9606.ENSP00000264657	0	0	0	0	0	0.182	0.9	0.984	0.998
IL10RA	IL10RB	9606.ENSP00000227752	9606.ENSP00000290200	0	0	0	0	0	0.27	0.9	0.995	0.999
IL10RB	STAT3	9606.ENSP00000290200	9606.ENSP00000264657	0	0	0	0	0	0.056	0.6	0.646	0.854
IL10RB	STAT2	9606.ENSP00000290200	9606.ENSP00000315768	0	0	0	0	0	0.056	0.6	0.592	0.832
IL10RB	STAT1	9606.ENSP00000290200	9606.ENSP00000354394	0	0	0	0	0	0.056	0.6	0.646	0.854
IL10RB	TYK2	9606.ENSP00000290200	9606.ENSP00000431885	0	0	0	0	0	0.056	0.8	0.993	0.998
IL12RB1	STAT3	9606.ENSP00000470788	9606.ENSP00000264657	0	0	0	0	0	0.182	0.9	0.596	0.964
IL12RB1	SOCS1	9606.ENSP00000470788	9606.ENSP00000329418	0	0	0	0	0	0	0.9	0.333	0.93
IL12RB1	SOCS3	9606.ENSP00000470788	9606.ENSP00000330341	0	0	0	0	0	0	0.9	0.486	0.946
IL12RB1	STAT1	9606.ENSP00000470788	9606.ENSP00000354394	0	0	0	0	0	0.076	0.9	0.681	0.967
IL12RB1	TYK2	9606.ENSP00000470788	9606.ENSP00000431885	0	0	0	0	0	0.182	0.9	0.984	0.998
SOCS1	STAT3	9606.ENSP00000329418	9606.ENSP00000264657	0	0	0	0	0	0.161	0.6	0.768	0.915
SOCS1	STAT2	9606.ENSP00000329418	9606.ENSP00000315768	0	0	0	0	0	0.161	0.6	0.667	0.878
SOCS1	SOCS3	9606.ENSP00000329418	9606.ENSP00000330341	0	0	0	0.739	0	0	0.8	0.925	0.848
SOCS1	STAT1	9606.ENSP00000329418	9606.ENSP00000354394	0	0	0	0	0	0.161	0.6	0.836	0.94
SOCS1	TYK2	9606.ENSP00000329418	9606.ENSP00000431885	0	0	0	0	0	0.515	0.9	0.979	0.998
SOCS3	STAT3	9606.ENSP00000330341	9606.ENSP00000264657	0	0	0	0	0	0.361	0.9	0.891	0.992
SOCS3	STAT2	9606.ENSP00000330341	9606.ENSP00000315768	0	0	0	0	0	0.161	0.8	0.704	0.946
SOCS3	TYK2	9606.ENSP00000330341	9606.ENSP00000431885	0	0	0	0	0	0.103	0.9	0.818	0.982
SOCS3	STAT1	9606.ENSP00000330341	9606.ENSP00000354394	0	0	0	0	0	0.161	0.9	0.808	0.982
STAT1	STAT3	9606.ENSP00000354394	9606.ENSP00000264657	0	0	0	0.948	0	0.882	0.9	0.989	0.988
STAT1	STAT2	9606.ENSP00000354394	9606.ENSP00000315768	0	0	0	0.889	0	0.881	0.9	0.992	0.988
STAT1	TYK2	9606.ENSP00000354394	9606.ENSP00000431885	0	0	0	0	0	0.518	0.9	0.912	0.995
STAT2	STAT3	9606.ENSP00000315768	9606.ENSP00000264657	0	0	0	0.867	0	0.345	0.9	0.847	0.939
STAT2	TYK2	9606.ENSP00000315768	9606.ENSP00000431885	0	0	0	0	0	0.294	0.9	0.918	0.993
STAT3	TYK2	9606.ENSP00000264657	9606.ENSP00000431885	0	0	0	0	0	0.14	0.9	0.897	0.99
BATF3	CLEC9A	9606.ENSP00000243440	9606.ENSP00000348074	0	0	0	0	0	0	0	0.731	0.731
BATF3	XCR1	9606.ENSP00000243440	9606.ENSP00000310405	0	0	0	0	0	0	0	0.78	0.78
CCL19	XCR1	9606.ENSP00000308815	9606.ENSP00000310405	0	0	0	0	0	0	0.6	0.459	0.774
CCL19	CXCL9	9606.ENSP00000308815	9606.ENSP00000354901	0	0	0	0	0	0	0	0.713	0.713
CCL19	CCL20	9606.ENSP00000308815	9606.ENSP00000351671	0	0	0	0	0	0	0.6	0.718	0.882
CCL19	CCL3	9606.ENSP00000308815	9606.ENSP00000477908	0	0	0	0	0	0	0.9	0.702	0.968
CCL20	XCR1	9606.ENSP00000351671	9606.ENSP00000310405	0	0	0	0	0	0	0.6	0.451	0.771
CCL20	CXCL9	9606.ENSP00000351671	9606.ENSP00000354901	0	0	0	0	0	0	0	0.725	0.725
CCL20	CCL3	9606.ENSP00000351671	9606.ENSP00000477908	0	0	0	0	0	0	0.9	0.766	0.975
CCL3	XCR1	9606.ENSP00000477908	9606.ENSP00000310405	0	0	0	0	0	0	0.6	0.536	0.806
CCL3	CXCL9	9606.ENSP00000477908	9606.ENSP00000354901	0	0	0	0	0	0	0	0.87	0.87
CCL3	XCL1	9606.ENSP00000477908	9606.ENSP00000356792	0	0	0	0	0	0	0	0.708	0.708
CCL3	CD8A	9606.ENSP00000477908	9606.ENSP00000386559	0	0	0	0	0	0	0	0.739	0.739
CCL8	XCR1	9606.ENSP00000378118	9606.ENSP00000310405	0	0	0	0	0	0	0.6	0.63	0.845
CCL8	CXCL9	9606.ENSP00000378118	9606.ENSP00000354901	0	0	0	0	0	0	0	0.704	0.704
CD8A	XCR1	9606.ENSP00000386559	9606.ENSP00000310405	0	0	0	0	0	0	0	0.829	0.829
CD8A	CXCL9	9606.ENSP00000386559	9606.ENSP00000354901	0	0	0	0	0	0	0	0.796	0.796
CLEC9A	XCR1	9606.ENSP00000348074	9606.ENSP00000310405	0	0	0	0	0	0	0	0.81	0.81
CXCL9	XCR1	9606.ENSP00000354901	9606.ENSP00000310405	0	0	0	0	0	0	0.6	0.422	0.759
XCL1	XCR1	9606.ENSP00000356792	9606.ENSP00000310405	0	0	0	0	0	0.226	0.8	0.994	0.999
XCL1	XCL2	9606.ENSP00000356792	9606.ENSP00000356793	0	0	0	0.984	0	0	0.8	0.906	0.802
XCL2	XCR1	9606.ENSP00000356793	9606.ENSP00000310405	0	0	0	0	0	0.226	0.8	0.961	0.993

## Sheet:  T6 Risk genes-disease assoc.
Network	#term ID	term description	observed gene count	background gene count	strength	false discovery rate	matching proteins in your network (IDs)	matching proteins in your network (labels)
1	DOID:2914	Immune system disease	28	611	0.88	2.67e-13	9606.ENSP00000225831,9606.ENSP00000227752,9606.ENSP00000231449,9606.ENSP00000252486,9606.ENSP00000263341,9606.ENSP00000264657,9606.ENSP00000264690,9606.ENSP00000290200,9606.ENSP00000314151,9606.ENSP00000324890,9606.ENSP00000344192,9606.ENSP00000346839,9606.ENSP00000354394,9606.ENSP00000357470,9606.ENSP00000358997,9606.ENSP00000360715,9606.ENSP00000368699,9606.ENSP00000369581,9606.ENSP00000370698,…	CCL2,IL10RA,IL4,APOE,IL1B,STAT3,KLKB1,IL10RB,KLK3,CD28,IL17A,FN1,STAT1,IL6R,IRAK1,TMEM189,ISG15,IFNB1,IL6ST,ITGB2,IL6,OAS1,TNF,MYD88,IL10,TYK2,TRAF6,IL12RB1
1	DOID:1936	Atherosclerosis	10	17	1.99	5.7e-13	9606.ENSP00000225831,9606.ENSP00000233242,9606.ENSP00000236850,9606.ENSP00000252486,9606.ENSP00000263341,9606.ENSP00000294728,9606.ENSP00000363868,9606.ENSP00000371471,9606.ENSP00000385675,9606.ENSP00000398698	CCL2,APOB,APOA1,APOE,IL1B,VCAM1,ABCA1,RSAD2,IL6,TNF
1	DOID:7	Disease of anatomical entity	68	4452	0.41	5.7e-13	9606.ENSP00000225831,9606.ENSP00000227752,9606.ENSP00000231449,9606.ENSP00000233242,9606.ENSP00000236850,9606.ENSP00000245414,9606.ENSP00000252486,9606.ENSP00000260197,9606.ENSP00000260585,9606.ENSP00000260645,9606.ENSP00000262209,9606.ENSP00000263341,9606.ENSP00000264657,9606.ENSP00000264690,9606.ENSP00000267082,9606.ENSP00000272286,9606.ENSP00000276927,9606.ENSP00000284981,9606.ENSP00000290200,…	CCL2,IL10RA,IL4,APOB,APOA1,IRF1,APOE,SORL1,EPT1,ABCG5,TRPA1,IL1B,STAT3,KLKB1,ITGB7,ABCG8,IFNA1,APP,IL10RB,S100B,VCAM1,CXCL8,CASP3,KLK3,TUBB3,A2M,GSK3B,CD28,KLK4,MX2,SNCA,MAPT,JAK1,IL17A,CTSL,VAPA,CTSB,FN1,STAT1,RNASEL,IL6R,IRAK1,TMEM189,TREM2,ABCA1,ISG15,IFNA2,IFNB1,TLR7,IL6ST,RSAD2,VLDLR,YWHAZ,ITGB2,IL6,DYSF,PLD3,OAS1,TNF,MYD88,IL10,CDK5,TYK2,TRAF6,ITGB3,ELANE,IL12RB1,HAMP
1	DOID:612	Primary immunodeficiency disease	23	426	0.96	1.41e-12	9606.ENSP00000225831,9606.ENSP00000227752,9606.ENSP00000231449,9606.ENSP00000263341,9606.ENSP00000264657,9606.ENSP00000264690,9606.ENSP00000290200,9606.ENSP00000324890,9606.ENSP00000344192,9606.ENSP00000354394,9606.ENSP00000357470,9606.ENSP00000358997,9606.ENSP00000368699,9606.ENSP00000369581,9606.ENSP00000370698,9606.ENSP00000380948,9606.ENSP00000385675,9606.ENSP00000388001,9606.ENSP00000398698,…	CCL2,IL10RA,IL4,IL1B,STAT3,KLKB1,IL10RB,CD28,IL17A,STAT1,IL6R,IRAK1,ISG15,IFNB1,IL6ST,ITGB2,IL6,OAS1,TNF,IL10,TYK2,TRAF6,IL12RB1
1	DOID:4	Disease	76	5921	0.33	8.42e-12	9606.ENSP00000215637,9606.ENSP00000225831,9606.ENSP00000227752,9606.ENSP00000231449,9606.ENSP00000233242,9606.ENSP00000236850,9606.ENSP00000245414,9606.ENSP00000252486,9606.ENSP00000257570,9606.ENSP00000260197,9606.ENSP00000260585,9606.ENSP00000260645,9606.ENSP00000262209,9606.ENSP00000263341,9606.ENSP00000264657,9606.ENSP00000264690,9606.ENSP00000267082,9606.ENSP00000272286,9606.ENSP00000276927,…	MADCAM1,CCL2,IL10RA,IL4,APOB,APOA1,IRF1,APOE,OASL,SORL1,EPT1,ABCG5,TRPA1,IL1B,STAT3,KLKB1,ITGB7,ABCG8,IFNA1,APP,IL10RB,S100B,VCAM1,CXCL8,CASP3,KLK3,TUBB3,A2M,GSK3B,CD28,KLK4,MX2,SNCA,MAPT,OAS2,JAK1,IL17A,CTSL,VAPA,CTSB,FYN,FN1,SREBF1,STAT1,ABCG1,RNASEL,IL6R,IRAK1,TMEM189,TREM2,ABCA1,ISG15,IFNA2,IFNB1,TLR7,IL6ST,RSAD2,VLDLR,YWHAZ,ITGB2,MX1,IL6,DYSF,PLD3,OAS1,TNF,MYD88,IL10,CDK5,TYK2,TRAF6,ITGB3,LD…
1	DOID:417	Autoimmune disease	19	294	1.03	1.81e-11	9606.ENSP00000225831,9606.ENSP00000227752,9606.ENSP00000231449,9606.ENSP00000263341,9606.ENSP00000264657,9606.ENSP00000290200,9606.ENSP00000324890,9606.ENSP00000344192,9606.ENSP00000354394,9606.ENSP00000357470,9606.ENSP00000358997,9606.ENSP00000369581,9606.ENSP00000370698,9606.ENSP00000385675,9606.ENSP00000388001,9606.ENSP00000398698,9606.ENSP00000412237,9606.ENSP00000431885,9606.ENSP00000433623	CCL2,IL10RA,IL4,IL1B,STAT3,IL10RB,CD28,IL17A,STAT1,IL6R,IRAK1,IFNB1,IL6ST,IL6,OAS1,TNF,IL10,TYK2,TRAF6
1	DOID:5295	Intestinal disease	16	181	1.17	2.21e-11	9606.ENSP00000225831,9606.ENSP00000227752,9606.ENSP00000231449,9606.ENSP00000260645,9606.ENSP00000263341,9606.ENSP00000264657,9606.ENSP00000267082,9606.ENSP00000272286,9606.ENSP00000290200,9606.ENSP00000314151,9606.ENSP00000344192,9606.ENSP00000370034,9606.ENSP00000385675,9606.ENSP00000398698,9606.ENSP00000412237,9606.ENSP00000431885	CCL2,IL10RA,IL4,ABCG5,IL1B,STAT3,ITGB7,ABCG8,IL10RB,KLK3,IL17A,TLR7,IL6,TNF,IL10,TYK2
1	DOID:0050117	Disease by infectious agent	19	317	1	4.2e-11	9606.ENSP00000215637,9606.ENSP00000231449,9606.ENSP00000257570,9606.ENSP00000263341,9606.ENSP00000264657,9606.ENSP00000276927,9606.ENSP00000306512,9606.ENSP00000333657,9606.ENSP00000340820,9606.ENSP00000344192,9606.ENSP00000345344,9606.ENSP00000345656,9606.ENSP00000354394,9606.ENSP00000369554,9606.ENSP00000369581,9606.ENSP00000370034,9606.ENSP00000385675,9606.ENSP00000398698,9606.ENSP00000412237	MADCAM1,IL4,OASL,IL1B,STAT3,IFNA1,CXCL8,MX2,MAPT,IL17A,CTSL,VAPA,STAT1,IFNA2,IFNB1,TLR7,IL6,TNF,IL10
1	DOID:0050589	Inflammatory bowel disease	11	52	1.55	4.2e-11	9606.ENSP00000225831,9606.ENSP00000227752,9606.ENSP00000263341,9606.ENSP00000264657,9606.ENSP00000267082,9606.ENSP00000290200,9606.ENSP00000344192,9606.ENSP00000385675,9606.ENSP00000398698,9606.ENSP00000412237,9606.ENSP00000431885	CCL2,IL10RA,IL1B,STAT3,ITGB7,IL10RB,IL17A,IL6,TNF,IL10,TYK2
1	DOID:10652	Alzheimers disease	10	35	1.68	4.2e-11	9606.ENSP00000252486,9606.ENSP00000260197,9606.ENSP00000284981,9606.ENSP00000323929,9606.ENSP00000324806,9606.ENSP00000338345,9606.ENSP00000340820,9606.ENSP00000345672,9606.ENSP00000362205,9606.ENSP00000385675	APOE,SORL1,APP,A2M,GSK3B,SNCA,MAPT,CTSB,TREM2,IL6
1	DOID:77	Gastrointestinal system disease	22	510	0.86	2.02e-10	9606.ENSP00000225831,9606.ENSP00000227752,9606.ENSP00000231449,9606.ENSP00000260585,9606.ENSP00000260645,9606.ENSP00000263341,9606.ENSP00000264657,9606.ENSP00000267082,9606.ENSP00000272286,9606.ENSP00000276927,9606.ENSP00000290200,9606.ENSP00000306512,9606.ENSP00000311032,9606.ENSP00000314151,9606.ENSP00000326159,9606.ENSP00000344192,9606.ENSP00000345344,9606.ENSP00000370034,9606.ENSP00000385675,…	CCL2,IL10RA,IL4,EPT1,ABCG5,IL1B,STAT3,ITGB7,ABCG8,IFNA1,IL10RB,CXCL8,CASP3,KLK3,KLK4,IL17A,CTSL,TLR7,IL6,TNF,IL10,TYK2
1	DOID:0060032	Autoimmune disease of musculoskeletal system	14	170	1.14	1.37e-09	9606.ENSP00000225831,9606.ENSP00000231449,9606.ENSP00000263341,9606.ENSP00000324890,9606.ENSP00000344192,9606.ENSP00000354394,9606.ENSP00000357470,9606.ENSP00000358997,9606.ENSP00000370698,9606.ENSP00000385675,9606.ENSP00000398698,9606.ENSP00000412237,9606.ENSP00000431885,9606.ENSP00000433623	CCL2,IL4,IL1B,CD28,IL17A,STAT1,IL6R,IRAK1,IL6ST,IL6,TNF,IL10,TYK2,TRAF6
1	DOID:0060180	Colitis	8	22	1.78	1.75e-09	9606.ENSP00000227752,9606.ENSP00000263341,9606.ENSP00000264657,9606.ENSP00000290200,9606.ENSP00000344192,9606.ENSP00000385675,9606.ENSP00000398698,9606.ENSP00000412237	IL10RA,IL1B,STAT3,IL10RB,IL17A,IL6,TNF,IL10
1	DOID:934	Viral infectious disease	12	108	1.27	1.75e-09	9606.ENSP00000215637,9606.ENSP00000257570,9606.ENSP00000264657,9606.ENSP00000276927,9606.ENSP00000333657,9606.ENSP00000354394,9606.ENSP00000369554,9606.ENSP00000369581,9606.ENSP00000370034,9606.ENSP00000385675,9606.ENSP00000398698,9606.ENSP00000412237	MADCAM1,OASL,STAT3,IFNA1,MX2,STAT1,IFNA2,IFNB1,TLR7,IL6,TNF,IL10
1	DOID:0050828	Artery disease	12	118	1.23	4.25e-09	9606.ENSP00000225831,9606.ENSP00000233242,9606.ENSP00000236850,9606.ENSP00000252486,9606.ENSP00000263341,9606.ENSP00000291700,9606.ENSP00000294728,9606.ENSP00000306512,9606.ENSP00000363868,9606.ENSP00000371471,9606.ENSP00000385675,9606.ENSP00000398698	CCL2,APOB,APOA1,APOE,IL1B,S100B,VCAM1,CXCL8,ABCA1,RSAD2,IL6,TNF
1	DOID:178	Vascular disease	14	223	1.02	3.23e-08	9606.ENSP00000225831,9606.ENSP00000233242,9606.ENSP00000236850,9606.ENSP00000252486,9606.ENSP00000263341,9606.ENSP00000291700,9606.ENSP00000294728,9606.ENSP00000306512,9606.ENSP00000311032,9606.ENSP00000363868,9606.ENSP00000371471,9606.ENSP00000385675,9606.ENSP00000398698,9606.ENSP00000412237	CCL2,APOB,APOA1,APOE,IL1B,S100B,VCAM1,CXCL8,CASP3,ABCA1,RSAD2,IL6,TNF,IL10
1	DOID:1579	Respiratory system disease	14	263	0.95	2.37e-07	9606.ENSP00000231449,9606.ENSP00000245414,9606.ENSP00000263341,9606.ENSP00000276927,9606.ENSP00000306512,9606.ENSP00000340820,9606.ENSP00000345656,9606.ENSP00000369581,9606.ENSP00000370034,9606.ENSP00000385675,9606.ENSP00000398698,9606.ENSP00000412237,9606.ENSP00000466090,9606.ENSP00000471894	IL4,IRF1,IL1B,IFNA1,CXCL8,MAPT,VAPA,IFNB1,TLR7,IL6,TNF,IL10,ELANE,HAMP
1	DOID:848	Arthritis	10	108	1.19	4.41e-07	9606.ENSP00000263341,9606.ENSP00000324890,9606.ENSP00000344192,9606.ENSP00000357470,9606.ENSP00000358997,9606.ENSP00000370698,9606.ENSP00000385675,9606.ENSP00000398698,9606.ENSP00000431885,9606.ENSP00000433623	IL1B,CD28,IL17A,IL6R,IRAK1,IL6ST,IL6,TNF,TYK2,TRAF6
1	DOID:1289	Neurodegenerative disease	17	462	0.79	7.03e-07	9606.ENSP00000252486,9606.ENSP00000260197,9606.ENSP00000264657,9606.ENSP00000284981,9606.ENSP00000323929,9606.ENSP00000324806,9606.ENSP00000338345,9606.ENSP00000340820,9606.ENSP00000344192,9606.ENSP00000345672,9606.ENSP00000362205,9606.ENSP00000369581,9606.ENSP00000371532,9606.ENSP00000379287,9606.ENSP00000385675,9606.ENSP00000387050,9606.ENSP00000419782	APOE,SORL1,STAT3,APP,A2M,GSK3B,SNCA,MAPT,IL17A,CTSB,TREM2,IFNB1,VLDLR,YWHAZ,IL6,PLD3,CDK5
1	DOID:0060861	Microphthalmia with limb anomalies	5	8	2.02	1.54e-06	9606.ENSP00000257570,9606.ENSP00000342278,9606.ENSP00000356530,9606.ENSP00000381601,9606.ENSP00000388001	OASL,OAS2,RNASEL,MX1,OAS1
1	DOID:850	Lung disease	11	172	1.03	2.14e-06	9606.ENSP00000231449,9606.ENSP00000245414,9606.ENSP00000263341,9606.ENSP00000306512,9606.ENSP00000340820,9606.ENSP00000345656,9606.ENSP00000385675,9606.ENSP00000398698,9606.ENSP00000412237,9606.ENSP00000466090,9606.ENSP00000471894	IL4,IRF1,IL1B,CXCL8,MAPT,VAPA,IL6,TNF,IL10,ELANE,HAMP
1	DOID:8469	Influenza	5	10	1.92	3.28e-06	9606.ENSP00000276927,9606.ENSP00000369581,9606.ENSP00000370034,9606.ENSP00000385675,9606.ENSP00000398698	IFNA1,IFNB1,TLR7,IL6,TNF
1	DOID:7148	Rheumatoid arthritis	8	71	1.28	3.63e-06	9606.ENSP00000324890,9606.ENSP00000357470,9606.ENSP00000358997,9606.ENSP00000370698,9606.ENSP00000385675,9606.ENSP00000398698,9606.ENSP00000431885,9606.ENSP00000433623	CD28,IL6R,IRAK1,IL6ST,IL6,TNF,TYK2,TRAF6
1	DOID:552	Pneumonia	6	25	1.6	3.94e-06	9606.ENSP00000263341,9606.ENSP00000306512,9606.ENSP00000345656,9606.ENSP00000385675,9606.ENSP00000398698,9606.ENSP00000412237	IL1B,CXCL8,VAPA,IL6,TNF,IL10
1	DOID:331	Central nervous system disease	24	1107	0.56	6.4e-06	9606.ENSP00000236850,9606.ENSP00000252486,9606.ENSP00000260197,9606.ENSP00000260585,9606.ENSP00000263341,9606.ENSP00000264657,9606.ENSP00000284981,9606.ENSP00000291700,9606.ENSP00000311032,9606.ENSP00000323929,9606.ENSP00000324806,9606.ENSP00000338345,9606.ENSP00000340820,9606.ENSP00000344192,9606.ENSP00000345672,9606.ENSP00000362205,9606.ENSP00000369581,9606.ENSP00000371532,9606.ENSP00000379287,…	APOA1,APOE,SORL1,EPT1,IL1B,STAT3,APP,S100B,CASP3,A2M,GSK3B,SNCA,MAPT,IL17A,CTSB,TREM2,IFNB1,VLDLR,YWHAZ,IL6,PLD3,TNF,IL10,CDK5
1	DOID:0060158	Acquired metabolic disease	13	320	0.83	1.32e-05	9606.ENSP00000236850,9606.ENSP00000252486,9606.ENSP00000260197,9606.ENSP00000264657,9606.ENSP00000284981,9606.ENSP00000323929,9606.ENSP00000324806,9606.ENSP00000346839,9606.ENSP00000348069,9606.ENSP00000385675,9606.ENSP00000388001,9606.ENSP00000398698,9606.ENSP00000471894	APOA1,APOE,SORL1,STAT3,APP,A2M,GSK3B,FN1,SREBF1,IL6,OAS1,TNF,HAMP
1	DOID:11394	Adult respiratory distress syndrome	4	5	2.13	1.99e-05	9606.ENSP00000263341,9606.ENSP00000306512,9606.ENSP00000385675,9606.ENSP00000398698	IL1B,CXCL8,IL6,TNF
1	DOID:1176	Bronchial disease	6	38	1.42	3.01e-05	9606.ENSP00000231449,9606.ENSP00000263341,9606.ENSP00000306512,9606.ENSP00000385675,9606.ENSP00000398698,9606.ENSP00000466090	IL4,IL1B,CXCL8,IL6,TNF,ELANE
1	DOID:12217	Lewy body dementia	4	7	1.98	4.87e-05	9606.ENSP00000252486,9606.ENSP00000284981,9606.ENSP00000338345,9606.ENSP00000340820	APOE,APP,SNCA,MAPT
1	DOID:3602	Toxic encephalopathy	4	7	1.98	4.87e-05	9606.ENSP00000263341,9606.ENSP00000284981,9606.ENSP00000311032,9606.ENSP00000338345	IL1B,APP,CASP3,SNCA
1	DOID:863	Nervous system disease	32	2132	0.4	8.97e-05	9606.ENSP00000231449,9606.ENSP00000233242,9606.ENSP00000236850,9606.ENSP00000252486,9606.ENSP00000260197,9606.ENSP00000260585,9606.ENSP00000262209,9606.ENSP00000263341,9606.ENSP00000264657,9606.ENSP00000284981,9606.ENSP00000291700,9606.ENSP00000311032,9606.ENSP00000320295,9606.ENSP00000323929,9606.ENSP00000324806,9606.ENSP00000338345,9606.ENSP00000340820,9606.ENSP00000344192,9606.ENSP00000345672,…	IL4,APOB,APOA1,APOE,SORL1,EPT1,TRPA1,IL1B,STAT3,APP,S100B,CASP3,TUBB3,A2M,GSK3B,SNCA,MAPT,IL17A,CTSB,FN1,STAT1,IL6R,TREM2,IFNA2,IFNB1,VLDLR,YWHAZ,IL6,PLD3,TNF,IL10,CDK5
1	DOID:1387	Hypolipoproteinemia	4	9	1.87	9.35e-05	9606.ENSP00000233242,9606.ENSP00000236850,9606.ENSP00000354995,9606.ENSP00000363868	APOB,APOA1,ABCG1,ABCA1
1	DOID:3393	Coronary artery disease	5	27	1.49	0.00013	9606.ENSP00000233242,9606.ENSP00000236850,9606.ENSP00000252486,9606.ENSP00000306512,9606.ENSP00000385675	APOB,APOA1,APOE,CXCL8,IL6
1	DOID:74	Hematopoietic system disease	13	409	0.73	0.00015	9606.ENSP00000231449,9606.ENSP00000263341,9606.ENSP00000264690,9606.ENSP00000314151,9606.ENSP00000343204,9606.ENSP00000344192,9606.ENSP00000369554,9606.ENSP00000380948,9606.ENSP00000401399,9606.ENSP00000412237,9606.ENSP00000452786,9606.ENSP00000466090,9606.ENSP00000471894	IL4,IL1B,KLKB1,KLK3,JAK1,IL17A,IFNA2,ITGB2,MYD88,IL10,ITGB3,ELANE,HAMP
1	DOID:824	Periodontitis	4	11	1.78	0.00016	9606.ENSP00000263341,9606.ENSP00000306512,9606.ENSP00000385675,9606.ENSP00000398698	IL1B,CXCL8,IL6,TNF
1	DOID:8577	Ulcerative colitis	4	13	1.71	0.00027	9606.ENSP00000227752,9606.ENSP00000290200,9606.ENSP00000398698,9606.ENSP00000412237	IL10RA,IL10RB,TNF,IL10
1	DOID:0050686	Organ system cancer	16	677	0.6	0.00034	9606.ENSP00000231449,9606.ENSP00000245414,9606.ENSP00000252486,9606.ENSP00000260585,9606.ENSP00000263341,9606.ENSP00000264657,9606.ENSP00000311032,9606.ENSP00000314151,9606.ENSP00000343204,9606.ENSP00000356530,9606.ENSP00000369554,9606.ENSP00000370034,9606.ENSP00000385675,9606.ENSP00000398698,9606.ENSP00000401399,9606.ENSP00000412237	IL4,IRF1,APOE,EPT1,IL1B,STAT3,CASP3,KLK3,JAK1,RNASEL,IFNA2,TLR7,IL6,TNF,MYD88,IL10
1	DOID:1168	Familial hyperlipidemia	4	16	1.62	0.00052	9606.ENSP00000233242,9606.ENSP00000236850,9606.ENSP00000252486,9606.ENSP00000454071	APOB,APOA1,APOE,LDLR
1	DOID:9120	Amyloidosis	6	70	1.16	0.00057	9606.ENSP00000236850,9606.ENSP00000252486,9606.ENSP00000260197,9606.ENSP00000284981,9606.ENSP00000323929,9606.ENSP00000346839	APOA1,APOE,SORL1,APP,A2M,FN1
1	DOID:0050697	Chorioamnionitis	3	4	2.1	0.00061	9606.ENSP00000263341,9606.ENSP00000306512,9606.ENSP00000385675	IL1B,CXCL8,IL6
1	DOID:11396	Pulmonary edema	3	4	2.1	0.00061	9606.ENSP00000263341,9606.ENSP00000385675,9606.ENSP00000398698	IL1B,IL6,TNF
1	DOID:1388	Tangier disease	3	4	2.1	0.00061	9606.ENSP00000236850,9606.ENSP00000354995,9606.ENSP00000363868	APOA1,ABCG1,ABCA1
1	DOID:162	Cancer	18	895	0.53	0.00061	9606.ENSP00000231449,9606.ENSP00000245414,9606.ENSP00000252486,9606.ENSP00000260585,9606.ENSP00000263341,9606.ENSP00000264657,9606.ENSP00000311032,9606.ENSP00000314151,9606.ENSP00000333657,9606.ENSP00000343204,9606.ENSP00000346671,9606.ENSP00000356530,9606.ENSP00000369554,9606.ENSP00000370034,9606.ENSP00000385675,9606.ENSP00000398698,9606.ENSP00000401399,9606.ENSP00000412237	IL4,IRF1,APOE,EPT1,IL1B,STAT3,CASP3,KLK3,MX2,JAK1,FYN,RNASEL,IFNA2,TLR7,IL6,TNF,MYD88,IL10
1	DOID:17	Musculoskeletal system disease	20	1074	0.49	0.00061	9606.ENSP00000225831,9606.ENSP00000231449,9606.ENSP00000252486,9606.ENSP00000263341,9606.ENSP00000323929,9606.ENSP00000324890,9606.ENSP00000340820,9606.ENSP00000344192,9606.ENSP00000354394,9606.ENSP00000357470,9606.ENSP00000358997,9606.ENSP00000370698,9606.ENSP00000385675,9606.ENSP00000386881,9606.ENSP00000398698,9606.ENSP00000412237,9606.ENSP00000431885,9606.ENSP00000433623,9606.ENSP00000452786,…	CCL2,IL4,APOE,IL1B,A2M,CD28,MAPT,IL17A,STAT1,IL6R,IRAK1,IL6ST,IL6,DYSF,TNF,IL10,TYK2,TRAF6,ITGB3,HAMP
1	DOID:37	Skin disease	13	481	0.66	0.00061	9606.ENSP00000225831,9606.ENSP00000231449,9606.ENSP00000236850,9606.ENSP00000252486,9606.ENSP00000263341,9606.ENSP00000264690,9606.ENSP00000290200,9606.ENSP00000326159,9606.ENSP00000344192,9606.ENSP00000354394,9606.ENSP00000370034,9606.ENSP00000398698,9606.ENSP00000412237	CCL2,IL4,APOA1,APOE,IL1B,KLKB1,IL10RB,KLK4,IL17A,STAT1,TLR7,TNF,IL10
1	DOID:409	Liver disease	6	72	1.14	0.00061	9606.ENSP00000231449,9606.ENSP00000260585,9606.ENSP00000276927,9606.ENSP00000311032,9606.ENSP00000398698,9606.ENSP00000412237	IL4,EPT1,IFNA1,CASP3,TNF,IL10
1	DOID:65	Connective tissue disease	16	715	0.57	0.00061	9606.ENSP00000225831,9606.ENSP00000231449,9606.ENSP00000263341,9606.ENSP00000324890,9606.ENSP00000340820,9606.ENSP00000344192,9606.ENSP00000357470,9606.ENSP00000358997,9606.ENSP00000370698,9606.ENSP00000385675,9606.ENSP00000398698,9606.ENSP00000412237,9606.ENSP00000431885,9606.ENSP00000433623,9606.ENSP00000452786,9606.ENSP00000471894	CCL2,IL4,IL1B,CD28,MAPT,IL17A,IL6R,IRAK1,IL6ST,IL6,TNF,IL10,TYK2,TRAF6,ITGB3,HAMP
1	DOID:0014667	Disease of metabolism	19	997	0.5	0.00062	9606.ENSP00000233242,9606.ENSP00000236850,9606.ENSP00000252486,9606.ENSP00000260197,9606.ENSP00000264657,9606.ENSP00000284981,9606.ENSP00000323929,9606.ENSP00000324806,9606.ENSP00000346839,9606.ENSP00000348069,9606.ENSP00000354995,9606.ENSP00000363868,9606.ENSP00000385675,9606.ENSP00000388001,9606.ENSP00000398698,9606.ENSP00000401399,9606.ENSP00000454071,9606.ENSP00000466090,9606.ENSP00000471894	APOB,APOA1,APOE,SORL1,STAT3,APP,A2M,GSK3B,FN1,SREBF1,ABCG1,ABCA1,IL6,OAS1,TNF,MYD88,LDLR,ELANE,HAMP
1	DOID:3146	Lipid metabolism disorder	6	74	1.13	0.00062	9606.ENSP00000233242,9606.ENSP00000236850,9606.ENSP00000252486,9606.ENSP00000354995,9606.ENSP00000363868,9606.ENSP00000454071	APOB,APOA1,APOE,ABCG1,ABCA1,LDLR
1	DOID:649	Prion disease	4	18	1.57	0.00062	9606.ENSP00000236850,9606.ENSP00000252486,9606.ENSP00000284981,9606.ENSP00000379287	APOA1,APOE,APP,YWHAZ
1	DOID:6713	Cerebrovascular disease	5	43	1.29	0.00069	9606.ENSP00000252486,9606.ENSP00000263341,9606.ENSP00000291700,9606.ENSP00000311032,9606.ENSP00000385675	APOE,IL1B,S100B,CASP3,IL6
1	DOID:9351	Diabetes mellitus	7	118	1	0.0007	9606.ENSP00000252486,9606.ENSP00000264657,9606.ENSP00000324806,9606.ENSP00000348069,9606.ENSP00000385675,9606.ENSP00000388001,9606.ENSP00000398698	APOE,STAT3,GSK3B,SREBF1,IL6,OAS1,TNF
1	DOID:8283	Peritonitis	3	5	2	0.00079	9606.ENSP00000263341,9606.ENSP00000385675,9606.ENSP00000398698	IL1B,IL6,TNF
1	DOID:0080001	Bone disease	13	523	0.62	0.0012	9606.ENSP00000231449,9606.ENSP00000263341,9606.ENSP00000324890,9606.ENSP00000344192,9606.ENSP00000357470,9606.ENSP00000358997,9606.ENSP00000370698,9606.ENSP00000385675,9606.ENSP00000398698,9606.ENSP00000412237,9606.ENSP00000431885,9606.ENSP00000433623,9606.ENSP00000452786	IL4,IL1B,CD28,IL17A,IL6R,IRAK1,IL6ST,IL6,TNF,IL10,TYK2,TRAF6,ITGB3
1	DOID:326	Ischemia	4	23	1.46	0.0012	9606.ENSP00000263341,9606.ENSP00000311032,9606.ENSP00000385675,9606.ENSP00000398698	IL1B,CASP3,IL6,TNF
1	DOID:8778	Crohns disease	4	24	1.45	0.0014	9606.ENSP00000264657,9606.ENSP00000398698,9606.ENSP00000412237,9606.ENSP00000431885	STAT3,TNF,IL10,TYK2
1	DOID:2703	Synovitis	3	7	1.86	0.0015	9606.ENSP00000263341,9606.ENSP00000385675,9606.ENSP00000398698	IL1B,IL6,TNF
1	DOID:8536	Herpes zoster	3	7	1.86	0.0015	9606.ENSP00000264657,9606.ENSP00000354394,9606.ENSP00000412237	STAT3,STAT1,IL10
1	DOID:3118	Hepatobiliary disease	7	141	0.92	0.0018	9606.ENSP00000231449,9606.ENSP00000260585,9606.ENSP00000276927,9606.ENSP00000311032,9606.ENSP00000345344,9606.ENSP00000398698,9606.ENSP00000412237	IL4,EPT1,IFNA1,CASP3,CTSL,TNF,IL10
1	DOID:2841	Asthma	4	28	1.38	0.0022	9606.ENSP00000231449,9606.ENSP00000263341,9606.ENSP00000385675,9606.ENSP00000398698	IL4,IL1B,IL6,TNF
1	DOID:1205	Allergic disease	5	60	1.14	0.0025	9606.ENSP00000231449,9606.ENSP00000263341,9606.ENSP00000360715,9606.ENSP00000398698,9606.ENSP00000412237	IL4,IL1B,TMEM189,TNF,IL10
1	DOID:15	Reproductive system disease	9	283	0.73	0.0037	9606.ENSP00000263341,9606.ENSP00000264657,9606.ENSP00000306512,9606.ENSP00000314151,9606.ENSP00000340820,9606.ENSP00000356530,9606.ENSP00000369554,9606.ENSP00000370034,9606.ENSP00000385675	IL1B,STAT3,CXCL8,KLK3,MAPT,RNASEL,IFNA2,TLR7,IL6
1	DOID:0050739	Autosomal genetic disease	29	2323	0.32	0.0051	9606.ENSP00000233242,9606.ENSP00000252486,9606.ENSP00000257570,9606.ENSP00000260645,9606.ENSP00000263341,9606.ENSP00000264657,9606.ENSP00000264690,9606.ENSP00000272286,9606.ENSP00000284981,9606.ENSP00000306512,9606.ENSP00000338345,9606.ENSP00000342278,9606.ENSP00000344192,9606.ENSP00000354394,9606.ENSP00000356530,9606.ENSP00000362205,9606.ENSP00000363868,9606.ENSP00000368699,9606.ENSP00000369581,…	APOB,APOE,OASL,ABCG5,IL1B,STAT3,KLKB1,ABCG8,APP,CXCL8,SNCA,OAS2,IL17A,STAT1,RNASEL,TREM2,ABCA1,ISG15,IFNB1,VLDLR,ITGB2,MX1,DYSF,PLD3,OAS1,TYK2,ELANE,IL12RB1,HAMP
1	DOID:0060039	Autoimmune disease of skin and connective tissue	5	71	1.07	0.0051	9606.ENSP00000225831,9606.ENSP00000231449,9606.ENSP00000263341,9606.ENSP00000344192,9606.ENSP00000398698	CCL2,IL4,IL1B,IL17A,TNF
1	DOID:403	Mouth disease	6	122	0.92	0.0064	9606.ENSP00000263341,9606.ENSP00000306512,9606.ENSP00000326159,9606.ENSP00000370034,9606.ENSP00000385675,9606.ENSP00000398698	IL1B,CXCL8,KLK4,TLR7,IL6,TNF
1	DOID:1285	Rectal disease	3	14	1.55	0.0072	9606.ENSP00000314151,9606.ENSP00000370034,9606.ENSP00000412237	KLK3,TLR7,IL10
1	DOID:1091	Tooth disease	5	81	1.01	0.0086	9606.ENSP00000263341,9606.ENSP00000306512,9606.ENSP00000326159,9606.ENSP00000385675,9606.ENSP00000398698	IL1B,CXCL8,KLK4,IL6,TNF
1	DOID:438	Autoimmune disease of the nervous system	4	44	1.18	0.0099	9606.ENSP00000264657,9606.ENSP00000344192,9606.ENSP00000369581,9606.ENSP00000398698	STAT3,IL17A,IFNB1,TNF
1	DOID:0111989	Immunodeficiency 35	2	2	2.22	0.0108	9606.ENSP00000431885,9606.ENSP00000470788	TYK2,IL12RB1
1	DOID:10230	Aortic atherosclerosis	2	2	2.22	0.0108	9606.ENSP00000233242,9606.ENSP00000252486	APOB,APOE
1	DOID:2942	Bronchiolitis	2	2	2.22	0.0108	9606.ENSP00000231449,9606.ENSP00000306512	IL4,CXCL8
1	DOID:8544	Chronic fatigue syndrome	2	2	2.22	0.0108	9606.ENSP00000356530,9606.ENSP00000385675	RNASEL,IL6
1	DOID:986	Alopecia areata	4	46	1.16	0.011	9606.ENSP00000225831,9606.ENSP00000231449,9606.ENSP00000263341,9606.ENSP00000398698	CCL2,IL4,IL1B,TNF
1	DOID:0050737	Autosomal recessive disease	20	1422	0.37	0.0152	9606.ENSP00000233242,9606.ENSP00000252486,9606.ENSP00000257570,9606.ENSP00000260645,9606.ENSP00000264690,9606.ENSP00000272286,9606.ENSP00000306512,9606.ENSP00000342278,9606.ENSP00000354394,9606.ENSP00000356530,9606.ENSP00000362205,9606.ENSP00000368699,9606.ENSP00000380948,9606.ENSP00000381601,9606.ENSP00000386881,9606.ENSP00000388001,9606.ENSP00000431885,9606.ENSP00000466090,9606.ENSP00000470788,…	APOB,APOE,OASL,ABCG5,KLKB1,ABCG8,CXCL8,OAS2,STAT1,RNASEL,TREM2,ISG15,ITGB2,MX1,DYSF,OAS1,TYK2,ELANE,IL12RB1,HAMP
1	DOID:0090019	Sitosterolemia	2	3	2.05	0.0168	9606.ENSP00000260645,9606.ENSP00000272286	ABCG5,ABCG8
1	DOID:13809	Familial combined hyperlipidemia	2	3	2.05	0.0168	9606.ENSP00000233242,9606.ENSP00000236850	APOB,APOA1
1	DOID:6132	Bronchitis	2	3	2.05	0.0168	9606.ENSP00000306512,9606.ENSP00000385675	CXCL8,IL6
1	DOID:643	Progressive multifocal leukoencephalopathy	2	3	2.05	0.0168	9606.ENSP00000215637,9606.ENSP00000369581	MADCAM1,IFNB1
1	DOID:8725	Vascular dementia	2	3	2.05	0.0168	9606.ENSP00000252486,9606.ENSP00000284981	APOE,APP
1	DOID:2531	Hematologic cancer	6	158	0.8	0.0205	9606.ENSP00000231449,9606.ENSP00000263341,9606.ENSP00000314151,9606.ENSP00000343204,9606.ENSP00000401399,9606.ENSP00000412237	IL4,IL1B,KLK3,JAK1,MYD88,IL10
1	DOID:0080545	Hyper ige syndrome	2	4	1.92	0.0235	9606.ENSP00000264657,9606.ENSP00000431885	STAT3,TYK2
1	DOID:11870	Picks disease	2	4	1.92	0.0235	9606.ENSP00000338345,9606.ENSP00000340820	SNCA,MAPT
1	DOID:2377	Multiple sclerosis	3	24	1.32	0.0235	9606.ENSP00000264657,9606.ENSP00000344192,9606.ENSP00000369581	STAT3,IL17A,IFNB1
1	DOID:8893	Psoriasis	3	24	1.32	0.0235	9606.ENSP00000231449,9606.ENSP00000344192,9606.ENSP00000398698	IL4,IL17A,TNF
1	DOID:9111	Cutaneous leishmaniasis	2	4	1.92	0.0235	9606.ENSP00000231449,9606.ENSP00000412237	IL4,IL10
1	DOID:9146	Visceral leishmaniasis	2	4	1.92	0.0235	9606.ENSP00000231449,9606.ENSP00000412237	IL4,IL10
1	DOID:936	Brain disease	13	739	0.47	0.0235	9606.ENSP00000236850,9606.ENSP00000252486,9606.ENSP00000263341,9606.ENSP00000284981,9606.ENSP00000291700,9606.ENSP00000311032,9606.ENSP00000338345,9606.ENSP00000340820,9606.ENSP00000362205,9606.ENSP00000371532,9606.ENSP00000379287,9606.ENSP00000385675,9606.ENSP00000387050	APOA1,APOE,IL1B,APP,S100B,CASP3,SNCA,MAPT,TREM2,VLDLR,YWHAZ,IL6,PLD3
1	DOID:1398	Parasitic infectious disease	4	62	1.03	0.027	9606.ENSP00000231449,9606.ENSP00000345344,9606.ENSP00000398698,9606.ENSP00000412237	IL4,CTSL,TNF,IL10
1	DOID:0050136	Systemic mycosis	3	27	1.27	0.0297	9606.ENSP00000344192,9606.ENSP00000354394,9606.ENSP00000412237	IL17A,STAT1,IL10
1	DOID:0070028	APP-related cerebral amyloid angiopathy	2	5	1.83	0.0297	9606.ENSP00000252486,9606.ENSP00000284981	APOE,APP
1	DOID:12858	Huntingtons disease	2	5	1.83	0.0297	9606.ENSP00000284981,9606.ENSP00000338345	APP,SNCA
1	DOID:1485	Cystic fibrosis	2	5	1.83	0.0297	9606.ENSP00000306512,9606.ENSP00000466090	CXCL8,ELANE
1	DOID:2789	Parasitic protozoa infectious disease	3	27	1.27	0.0297	9606.ENSP00000231449,9606.ENSP00000398698,9606.ENSP00000412237	IL4,TNF,IL10
1	DOID:678	Progressive supranuclear palsy	2	5	1.83	0.0297	9606.ENSP00000338345,9606.ENSP00000340820	SNCA,MAPT
1	DOID:0050177	Monogenic disease	30	2778	0.26	0.0314	9606.ENSP00000233242,9606.ENSP00000252486,9606.ENSP00000257570,9606.ENSP00000260645,9606.ENSP00000263341,9606.ENSP00000264657,9606.ENSP00000264690,9606.ENSP00000267082,9606.ENSP00000272286,9606.ENSP00000284981,9606.ENSP00000306512,9606.ENSP00000338345,9606.ENSP00000342278,9606.ENSP00000344192,9606.ENSP00000354394,9606.ENSP00000356530,9606.ENSP00000362205,9606.ENSP00000363868,9606.ENSP00000368699,…	APOB,APOE,OASL,ABCG5,IL1B,STAT3,KLKB1,ITGB7,ABCG8,APP,CXCL8,SNCA,OAS2,IL17A,STAT1,RNASEL,TREM2,ABCA1,ISG15,IFNB1,VLDLR,ITGB2,MX1,DYSF,PLD3,OAS1,TYK2,ELANE,IL12RB1,HAMP
1	DOID:676	Juvenile rheumatoid arthritis	3	28	1.25	0.0314	9606.ENSP00000385675,9606.ENSP00000398698,9606.ENSP00000431885	IL6,TNF,TYK2
1	DOID:345	Uterine disease	4	68	0.99	0.0339	9606.ENSP00000263341,9606.ENSP00000306512,9606.ENSP00000370034,9606.ENSP00000385675	IL1B,CXCL8,TLR7,IL6
1	DOID:9352	Type 2 diabetes mellitus	3	29	1.24	0.0339	9606.ENSP00000252486,9606.ENSP00000348069,9606.ENSP00000398698	APOE,SREBF1,TNF
1	DOID:104	Bacterial infectious disease	5	122	0.84	0.0358	9606.ENSP00000306512,9606.ENSP00000345656,9606.ENSP00000385675,9606.ENSP00000398698,9606.ENSP00000412237	CXCL8,VAPA,IL6,TNF,IL10
1	DOID:1395	Schistosomiasis	2	6	1.75	0.0358	9606.ENSP00000231449,9606.ENSP00000412237	IL4,IL10
1	DOID:14735	Hereditary angioedema	2	6	1.75	0.0358	9606.ENSP00000264690,9606.ENSP00000326159	KLKB1,KLK4
1	DOID:883	Parasitic helminthiasis infectious disease	3	31	1.21	0.039	9606.ENSP00000231449,9606.ENSP00000345344,9606.ENSP00000412237	IL4,CTSL,IL10
1	DOID:48	Male reproductive system disease	5	128	0.82	0.0431	9606.ENSP00000264657,9606.ENSP00000314151,9606.ENSP00000356530,9606.ENSP00000369554,9606.ENSP00000370034	STAT3,KLK3,RNASEL,IFNA2,TLR7
1	DOID:13810	Familial hypercholesterolemia	2	7	1.68	0.0439	9606.ENSP00000233242,9606.ENSP00000454071	APOB,LDLR
1	DOID:1883	Hepatitis c	2	7	1.68	0.0439	9606.ENSP00000276927,9606.ENSP00000369554	IFNA1,IFNA2
2	DOID:612	Primary immunodeficiency disease	16	426	1.3	1.24e-13	9606.ENSP00000226574,9606.ENSP00000245907,9606.ENSP00000255030,9606.ENSP00000299367,9606.ENSP00000308541,9606.ENSP00000314299,9606.ENSP00000334145,9606.ENSP00000356395,9606.ENSP00000356399,9606.ENSP00000356671,9606.ENSP00000361359,9606.ENSP00000378130,9606.ENSP00000396688,9606.ENSP00000415941,9606.ENSP00000416561,9606.ENSP00000441691	NFKB1,C3,CRP,C2,F2,CFHR1,F3,CFHR3,CFH,SERPINC1,CD40,CFI,C4A,C4B,CFB,ITGAM
2	DOID:10871	Age related macular degeneration	8	41	2.01	3.19e-11	9606.ENSP00000245907,9606.ENSP00000299367,9606.ENSP00000314299,9606.ENSP00000356395,9606.ENSP00000356399,9606.ENSP00000378130,9606.ENSP00000416561,9606.ENSP00000436682	C3,C2,CFHR1,CFHR3,CFH,CFI,CFB,ARMS2
2	DOID:1247	Blood coagulation disease	9	76	1.8	3.19e-11	9606.ENSP00000218099,9606.ENSP00000308541,9606.ENSP00000308938,9606.ENSP00000334145,9606.ENSP00000356671,9606.ENSP00000356771,9606.ENSP00000364709,9606.ENSP00000364731,9606.ENSP00000377783	F9,F2,PLG,F3,SERPINC1,F5,F10,F7,PROS1
2	DOID:2452	Thrombophilia	7	18	2.31	3.19e-11	9606.ENSP00000218099,9606.ENSP00000308541,9606.ENSP00000308938,9606.ENSP00000334145,9606.ENSP00000356671,9606.ENSP00000356771,9606.ENSP00000377783	F9,F2,PLG,F3,SERPINC1,F5,PROS1
2	DOID:557	Kidney disease	12	243	1.42	3.19e-11	9606.ENSP00000245907,9606.ENSP00000255030,9606.ENSP00000308541,9606.ENSP00000314299,9606.ENSP00000356030,9606.ENSP00000356395,9606.ENSP00000356399,9606.ENSP00000378130,9606.ENSP00000379191,9606.ENSP00000415941,9606.ENSP00000416561,9606.ENSP00000441691	C3,CRP,F2,CFHR1,CD55,CFHR3,CFH,CFI,CD59,C4B,CFB,ITGAM
2	DOID:626	Complement deficiency	7	22	2.23	3.86e-11	9606.ENSP00000245907,9606.ENSP00000299367,9606.ENSP00000314299,9606.ENSP00000356395,9606.ENSP00000356399,9606.ENSP00000378130,9606.ENSP00000416561	C3,C2,CFHR1,CFHR3,CFH,CFI,CFB
2	DOID:0080301	Atypical hemolytic-uremic syndrome	6	11	2.46	1.57e-10	9606.ENSP00000245907,9606.ENSP00000314299,9606.ENSP00000356395,9606.ENSP00000356399,9606.ENSP00000378130,9606.ENSP00000416561	C3,CFHR1,CFHR3,CFH,CFI,CFB
2	DOID:12554	Hemolytic-uremic syndrome	6	14	2.36	4.09e-10	9606.ENSP00000245907,9606.ENSP00000314299,9606.ENSP00000356395,9606.ENSP00000356399,9606.ENSP00000378130,9606.ENSP00000416561	C3,CFHR1,CFHR3,CFH,CFI,CFB
2	DOID:0060903	Thrombosis	6	18	2.25	1.3e-09	9606.ENSP00000255030,9606.ENSP00000308541,9606.ENSP00000308938,9606.ENSP00000334145,9606.ENSP00000356671,9606.ENSP00000364709	CRP,F2,PLG,F3,SERPINC1,F10
2	DOID:10952	Nephritis	6	38	1.92	6.17e-08	9606.ENSP00000245907,9606.ENSP00000314299,9606.ENSP00000356395,9606.ENSP00000356399,9606.ENSP00000415941,9606.ENSP00000441691	C3,CFHR1,CFHR3,CFH,C4B,ITGAM
2	DOID:0111902	Thrombophilia due to activated protein c resistance	4	5	2.63	3.91e-07	9606.ENSP00000308541,9606.ENSP00000334145,9606.ENSP00000356671,9606.ENSP00000356771	F2,F3,SERPINC1,F5
2	DOID:4193	Intracranial thrombosis	4	5	2.63	3.91e-07	9606.ENSP00000255030,9606.ENSP00000334145,9606.ENSP00000356671,9606.ENSP00000364709	CRP,F3,SERPINC1,F10
2	DOID:9477	Pulmonary embolism	4	5	2.63	3.91e-07	9606.ENSP00000308541,9606.ENSP00000308938,9606.ENSP00000334145,9606.ENSP00000356671	F2,PLG,F3,SERPINC1
2	DOID:3407	Carotid artery disease	4	7	2.48	8.07e-07	9606.ENSP00000255030,9606.ENSP00000308938,9606.ENSP00000334145,9606.ENSP00000364709	CRP,PLG,F3,F10
2	DOID:417	Autoimmune disease	9	294	1.21	8.12e-07	9606.ENSP00000226574,9606.ENSP00000255030,9606.ENSP00000308541,9606.ENSP00000334145,9606.ENSP00000356671,9606.ENSP00000361359,9606.ENSP00000396688,9606.ENSP00000415941,9606.ENSP00000441691	NFKB1,CRP,F2,F3,SERPINC1,CD40,C4A,C4B,ITGAM
2	DOID:74	Hematopoietic system disease	10	409	1.11	8.12e-07	9606.ENSP00000218099,9606.ENSP00000308541,9606.ENSP00000308938,9606.ENSP00000334145,9606.ENSP00000356671,9606.ENSP00000356771,9606.ENSP00000364709,9606.ENSP00000364731,9606.ENSP00000377783,9606.ENSP00000379191	F9,F2,PLG,F3,SERPINC1,F5,F10,F7,PROS1,CD59
2	DOID:5679	Retinal disease	9	297	1.2	8.23e-07	9606.ENSP00000245907,9606.ENSP00000299367,9606.ENSP00000308938,9606.ENSP00000314299,9606.ENSP00000356395,9606.ENSP00000356399,9606.ENSP00000378130,9606.ENSP00000416561,9606.ENSP00000436682	C3,C2,PLG,CFHR1,CFHR3,CFH,CFI,CFB,ARMS2
2	DOID:0050739	Autosomal genetic disease	19	2323	0.64	1.08e-06	9606.ENSP00000218099,9606.ENSP00000245907,9606.ENSP00000296280,9606.ENSP00000299367,9606.ENSP00000308541,9606.ENSP00000308938,9606.ENSP00000314299,9606.ENSP00000334145,9606.ENSP00000356395,9606.ENSP00000356399,9606.ENSP00000356671,9606.ENSP00000356771,9606.ENSP00000361359,9606.ENSP00000364709,9606.ENSP00000364731,9606.ENSP00000378130,9606.ENSP00000411770,9606.ENSP00000416561,9606.ENSP00000436682	F9,C3,MASP1,C2,F2,PLG,CFHR1,F3,CFHR3,CFH,SERPINC1,F5,CD40,F10,F7,CFI,COLEC11,CFB,ARMS2
2	DOID:2921	Glomerulonephritis	5	32	1.92	1.37e-06	9606.ENSP00000245907,9606.ENSP00000314299,9606.ENSP00000356395,9606.ENSP00000356399,9606.ENSP00000415941	C3,CFHR1,CFHR3,CFH,C4B
2	DOID:7	Disease of anatomical entity	25	4452	0.47	1.48e-06	9606.ENSP00000218099,9606.ENSP00000226574,9606.ENSP00000245907,9606.ENSP00000255030,9606.ENSP00000299367,9606.ENSP00000308541,9606.ENSP00000308938,9606.ENSP00000314299,9606.ENSP00000334145,9606.ENSP00000356030,9606.ENSP00000356395,9606.ENSP00000356399,9606.ENSP00000356671,9606.ENSP00000356771,9606.ENSP00000361359,9606.ENSP00000364709,9606.ENSP00000364731,9606.ENSP00000377783,9606.ENSP00000378130,…	F9,NFKB1,C3,CRP,C2,F2,PLG,CFHR1,F3,CD55,CFHR3,CFH,SERPINC1,F5,CD40,F10,F7,PROS1,CFI,CD59,C4A,C4B,CFB,ARMS2,ITGAM
2	DOID:4	Disease	28	5921	0.4	2.64e-06	9606.ENSP00000218099,9606.ENSP00000226574,9606.ENSP00000245907,9606.ENSP00000255030,9606.ENSP00000265171,9606.ENSP00000296280,9606.ENSP00000299367,9606.ENSP00000308541,9606.ENSP00000308938,9606.ENSP00000314299,9606.ENSP00000334145,9606.ENSP00000356030,9606.ENSP00000356395,9606.ENSP00000356399,9606.ENSP00000356671,9606.ENSP00000356771,9606.ENSP00000361359,9606.ENSP00000364709,9606.ENSP00000364731,…	F9,NFKB1,C3,CRP,EGF,MASP1,C2,F2,PLG,CFHR1,F3,CD55,CFHR3,CFH,SERPINC1,F5,CD40,F10,F7,PROS1,CFI,CD59,C4A,COLEC11,C4B,CFB,ARMS2,ITGAM
2	DOID:6713	Cerebrovascular disease	5	43	1.79	4.4e-06	9606.ENSP00000255030,9606.ENSP00000308938,9606.ENSP00000334145,9606.ENSP00000356671,9606.ENSP00000364709	CRP,PLG,F3,SERPINC1,F10
2	DOID:866	Vein disease	4	15	2.15	5.94e-06	9606.ENSP00000308541,9606.ENSP00000308938,9606.ENSP00000356671,9606.ENSP00000396688	F2,PLG,SERPINC1,C4A
2	DOID:0060051	Autoimmune disease of cardiovascular system	4	18	2.07	1.08e-05	9606.ENSP00000255030,9606.ENSP00000308541,9606.ENSP00000334145,9606.ENSP00000356671	CRP,F2,F3,SERPINC1
2	DOID:0050828	Artery disease	6	118	1.43	1.49e-05	9606.ENSP00000255030,9606.ENSP00000308541,9606.ENSP00000308938,9606.ENSP00000334145,9606.ENSP00000356671,9606.ENSP00000364709	CRP,F2,PLG,F3,SERPINC1,F10
2	DOID:10128	Venous insufficiency	3	3	2.72	1.58e-05	9606.ENSP00000308938,9606.ENSP00000356671,9606.ENSP00000396688	PLG,SERPINC1,C4A
2	DOID:2215	Factor vii deficiency	3	3	2.72	1.58e-05	9606.ENSP00000308541,9606.ENSP00000334145,9606.ENSP00000364731	F2,F3,F7
2	DOID:2216	Factor v deficiency	3	3	2.72	1.58e-05	9606.ENSP00000308541,9606.ENSP00000334145,9606.ENSP00000356771	F2,F3,F5
2	DOID:2222	Factor x deficiency	3	3	2.72	1.58e-05	9606.ENSP00000308541,9606.ENSP00000364709,9606.ENSP00000364731	F2,F10,F7
2	DOID:0060284	Paroxysmal nocturnal hemoglobinuria	3	4	2.6	2.45e-05	9606.ENSP00000245907,9606.ENSP00000356030,9606.ENSP00000379191	C3,CD55,CD59
2	DOID:178	Vascular disease	7	223	1.22	2.45e-05	9606.ENSP00000255030,9606.ENSP00000308541,9606.ENSP00000308938,9606.ENSP00000334145,9606.ENSP00000356671,9606.ENSP00000364709,9606.ENSP00000396688	CRP,F2,PLG,F3,SERPINC1,F10,C4A
2	DOID:2451	Protein s deficiency	3	4	2.6	2.45e-05	9606.ENSP00000308541,9606.ENSP00000356671,9606.ENSP00000377783	F2,SERPINC1,PROS1
2	DOID:2988	Antiphospholipid syndrome	3	4	2.6	2.45e-05	9606.ENSP00000308541,9606.ENSP00000334145,9606.ENSP00000356671	F2,F3,SERPINC1
2	DOID:9074	Systemic lupus erythematosus	4	27	1.89	3.31e-05	9606.ENSP00000255030,9606.ENSP00000396688,9606.ENSP00000415941,9606.ENSP00000441691	CRP,C4A,C4B,ITGAM
2	DOID:11247	Disseminated intravascular coagulation	3	5	2.5	3.42e-05	9606.ENSP00000308541,9606.ENSP00000334145,9606.ENSP00000356671	F2,F3,SERPINC1
2	DOID:2229	Factor xi deficiency	3	5	2.5	3.42e-05	9606.ENSP00000218099,9606.ENSP00000334145,9606.ENSP00000364731	F9,F3,F7
2	DOID:863	Nervous system disease	16	2132	0.6	5.13e-05	9606.ENSP00000245907,9606.ENSP00000255030,9606.ENSP00000299367,9606.ENSP00000308541,9606.ENSP00000308938,9606.ENSP00000314299,9606.ENSP00000334145,9606.ENSP00000356030,9606.ENSP00000356395,9606.ENSP00000356399,9606.ENSP00000356671,9606.ENSP00000361359,9606.ENSP00000364709,9606.ENSP00000378130,9606.ENSP00000416561,9606.ENSP00000436682	C3,CRP,C2,F2,PLG,CFHR1,F3,CD55,CFHR3,CFH,SERPINC1,CD40,F10,CFI,CFB,ARMS2
2	DOID:5614	Eye disease	10	715	0.87	5.76e-05	9606.ENSP00000245907,9606.ENSP00000299367,9606.ENSP00000308938,9606.ENSP00000314299,9606.ENSP00000356030,9606.ENSP00000356395,9606.ENSP00000356399,9606.ENSP00000378130,9606.ENSP00000416561,9606.ENSP00000436682	C3,C2,PLG,CFHR1,CD55,CFHR3,CFH,CFI,CFB,ARMS2
2	DOID:0050736	Autosomal dominant disease	12	1163	0.74	8.11e-05	9606.ENSP00000245907,9606.ENSP00000299367,9606.ENSP00000308541,9606.ENSP00000314299,9606.ENSP00000334145,9606.ENSP00000356395,9606.ENSP00000356399,9606.ENSP00000356671,9606.ENSP00000356771,9606.ENSP00000378130,9606.ENSP00000416561,9606.ENSP00000436682	C3,C2,F2,CFHR1,F3,CFHR3,CFH,SERPINC1,F5,CFI,CFB,ARMS2
2	DOID:934	Viral infectious disease	5	108	1.39	0.00019	9606.ENSP00000255030,9606.ENSP00000308541,9606.ENSP00000334145,9606.ENSP00000356030,9606.ENSP00000361359	CRP,F2,F3,CD55,CD40
2	DOID:0060032	Autoimmune disease of musculoskeletal system	5	170	1.19	0.0015	9606.ENSP00000255030,9606.ENSP00000361359,9606.ENSP00000396688,9606.ENSP00000415941,9606.ENSP00000441691	CRP,CD40,C4A,C4B,ITGAM
2	DOID:850	Lung disease	5	172	1.19	0.0015	9606.ENSP00000255030,9606.ENSP00000308541,9606.ENSP00000308938,9606.ENSP00000334145,9606.ENSP00000356671	CRP,F2,PLG,F3,SERPINC1
2	DOID:13620	Patent foramen ovale	2	2	2.72	0.0016	9606.ENSP00000308541,9606.ENSP00000356671	F2,SERPINC1
2	DOID:2235	Prothrombin deficiency	2	2	2.72	0.0016	9606.ENSP00000308541,9606.ENSP00000334145	F2,F3
2	DOID:2364	Post-thrombotic syndrome	2	2	2.72	0.0016	9606.ENSP00000308938,9606.ENSP00000356671	PLG,SERPINC1
2	DOID:3410	Carotid artery thrombosis	2	2	2.72	0.0016	9606.ENSP00000334145,9606.ENSP00000364709	F3,F10
2	DOID:0050117	Disease by infectious agent	6	317	1	0.002	9606.ENSP00000245907,9606.ENSP00000255030,9606.ENSP00000308541,9606.ENSP00000334145,9606.ENSP00000356030,9606.ENSP00000361359	C3,CRP,F2,F3,CD55,CD40
2	DOID:118	Pericardial effusion	2	3	2.55	0.0024	9606.ENSP00000255030,9606.ENSP00000308541	CRP,F2
2	DOID:2920	Membranoproliferative glomerulonephritis	2	3	2.55	0.0024	9606.ENSP00000245907,9606.ENSP00000356399	C3,CFH
2	DOID:3526	Cerebral infarction	2	3	2.55	0.0024	9606.ENSP00000255030,9606.ENSP00000308938	CRP,PLG
2	DOID:3572	Intracranial sinus thrombosis	2	3	2.55	0.0024	9606.ENSP00000255030,9606.ENSP00000356671	CRP,SERPINC1
2	DOID:3755	Antithrombin iii deficiency	2	3	2.55	0.0024	9606.ENSP00000308541,9606.ENSP00000356671	F2,SERPINC1
2	DOID:3875	Thrombophlebitis	2	3	2.55	0.0024	9606.ENSP00000308541,9606.ENSP00000356671	F2,SERPINC1
2	DOID:0060225	3MC syndrome	2	4	2.42	0.0032	9606.ENSP00000296280,9606.ENSP00000411770	MASP1,COLEC11
2	DOID:11695	Portal vein thrombosis	2	4	2.42	0.0032	9606.ENSP00000308541,9606.ENSP00000356671	F2,SERPINC1
2	DOID:12134	Factor viii deficiency	2	4	2.42	0.0032	9606.ENSP00000218099,9606.ENSP00000364731	F9,F7
2	DOID:12259	Hemophilia b	2	4	2.42	0.0032	9606.ENSP00000218099,9606.ENSP00000334145	F9,F3
2	DOID:224	Transient cerebral ischemia	2	4	2.42	0.0032	9606.ENSP00000255030,9606.ENSP00000308938	CRP,PLG
2	DOID:3756	Protein c deficiency	2	4	2.42	0.0032	9606.ENSP00000308541,9606.ENSP00000356671	F2,SERPINC1
2	DOID:2218	Blood platelet disease	3	39	1.61	0.0038	9606.ENSP00000308541,9606.ENSP00000334145,9606.ENSP00000364731	F2,F3,F7
2	DOID:2986	IgA glomerulonephritis	2	5	2.33	0.004	9606.ENSP00000356395,9606.ENSP00000356399	CFHR3,CFH
2	DOID:10314	Endocarditis	2	6	2.25	0.0053	9606.ENSP00000255030,9606.ENSP00000334145	CRP,F3
2	DOID:10873	Kuhnt-Junius degeneration	2	6	2.25	0.0053	9606.ENSP00000356399,9606.ENSP00000436682	CFH,ARMS2
2	DOID:9408	Acute myocardial infarction	2	8	2.12	0.0081	9606.ENSP00000255030,9606.ENSP00000308938	CRP,PLG
2	DOID:1588	Thrombocytopenia	2	9	2.07	0.0096	9606.ENSP00000308541,9606.ENSP00000334145	F2,F3
2	DOID:0050737	Autosomal recessive disease	10	1422	0.57	0.0115	9606.ENSP00000296280,9606.ENSP00000308541,9606.ENSP00000308938,9606.ENSP00000334145,9606.ENSP00000356671,9606.ENSP00000356771,9606.ENSP00000361359,9606.ENSP00000364709,9606.ENSP00000364731,9606.ENSP00000411770	MASP1,F2,PLG,F3,SERPINC1,F5,CD40,F10,F7,COLEC11
2	DOID:2213	Hemorrhagic disease	2	11	1.98	0.0129	9606.ENSP00000308541,9606.ENSP00000356671	F2,SERPINC1
2	DOID:2529	Splenic disease	2	11	1.98	0.0129	9606.ENSP00000255030,9606.ENSP00000308541	CRP,F2
2	DOID:65	Connective tissue disease	7	715	0.71	0.0166	9606.ENSP00000218099,9606.ENSP00000255030,9606.ENSP00000308938,9606.ENSP00000361359,9606.ENSP00000396688,9606.ENSP00000415941,9606.ENSP00000441691	F9,CRP,PLG,CD40,C4A,C4B,ITGAM
2	DOID:936	Brain disease	7	739	0.7	0.02	9606.ENSP00000245907,9606.ENSP00000255030,9606.ENSP00000308541,9606.ENSP00000308938,9606.ENSP00000334145,9606.ENSP00000356671,9606.ENSP00000364709	C3,CRP,F2,PLG,F3,SERPINC1,F10
2	DOID:0080012	X-linked recessive disease	4	193	1.04	0.0234	9606.ENSP00000218099,9606.ENSP00000334145,9606.ENSP00000361359,9606.ENSP00000364731	F9,F3,CD40,F7
2	DOID:865	Vasculitis	2	17	1.79	0.0267	9606.ENSP00000255030,9606.ENSP00000308541	CRP,F2
2	DOID:1074	Kidney failure	2	18	1.77	0.0293	9606.ENSP00000255030,9606.ENSP00000308541	CRP,F2
2	DOID:4251	Conjunctival disease	2	19	1.75	0.032	9606.ENSP00000308938,9606.ENSP00000356030	PLG,CD55
2	DOID:331	Central nervous system disease	8	1107	0.58	0.0407	9606.ENSP00000245907,9606.ENSP00000255030,9606.ENSP00000308541,9606.ENSP00000308938,9606.ENSP00000334145,9606.ENSP00000356671,9606.ENSP00000361359,9606.ENSP00000364709	C3,CRP,F2,PLG,F3,SERPINC1,CD40,F10
2	DOID:381	Arthropathy	2	24	1.64	0.0464	9606.ENSP00000218099,9606.ENSP00000255030	F9,CRP
3	DOID:10825	Essential hypertension	4	7	2.87	3.2e-07	9606.ENSP00000272190,9606.ENSP00000290866,9606.ENSP00000355627,9606.ENSP00000419422	REN,ACE,AGT,AGTR1
3	DOID:0080642	Middle East respiratory syndrome	2	2	3.12	0.0036	9606.ENSP00000353731,9606.ENSP00000389326	DPP4,ACE2
3	DOID:2388	Renal artery disease	2	2	3.12	0.0036	9606.ENSP00000272190,9606.ENSP00000290866	REN,ACE
3	DOID:1060	Hartnup disease	2	3	2.94	0.004	9606.ENSP00000305302,9606.ENSP00000478639	SLC6A19,SLC1A7
3	DOID:10824	Malignant hypertension	2	3	2.94	0.004	9606.ENSP00000272190,9606.ENSP00000290866	REN,ACE
3	DOID:11516	Hypertensive heart disease	2	3	2.94	0.004	9606.ENSP00000272190,9606.ENSP00000290866	REN,ACE
3	DOID:11664	Nephrosclerosis	2	3	2.94	0.004	9606.ENSP00000272190,9606.ENSP00000290866	REN,ACE
3	DOID:1591	Renovascular hypertension	2	3	2.94	0.004	9606.ENSP00000272190,9606.ENSP00000290866	REN,ACE
3	DOID:1558	Angioedema	2	8	2.51	0.0072	9606.ENSP00000265023,9606.ENSP00000290866	KNG1,ACE
3	DOID:783	End stage renal disease	2	8	2.51	0.0072	9606.ENSP00000272190,9606.ENSP00000290866	REN,ACE
3	DOID:18	Urinary system disease	4	315	1.22	0.0199	9606.ENSP00000272190,9606.ENSP00000290866,9606.ENSP00000418525,9606.ENSP00000478639	REN,ACE,MME,SLC1A7
3	DOID:0060158	Acquired metabolic disease	4	320	1.21	0.02	9606.ENSP00000272190,9606.ENSP00000290866,9606.ENSP00000305302,9606.ENSP00000353731	REN,ACE,SLC6A19,DPP4
3	DOID:5844	Myocardial infarction	2	20	2.12	0.0261	9606.ENSP00000272190,9606.ENSP00000290866	REN,ACE
3	DOID:6000	Congestive heart failure	2	20	2.12	0.0261	9606.ENSP00000272190,9606.ENSP00000290866	REN,ACE
3	DOID:576	Proteinuria	2	22	2.07	0.0284	9606.ENSP00000272190,9606.ENSP00000290866	REN,ACE
3	DOID:9352	Type 2 diabetes mellitus	2	29	1.95	0.0439	9606.ENSP00000290866,9606.ENSP00000353731	ACE,DPP4
4	DOID:2280	Hidradenitis suppurativa	2	3	3.07	0.0125	9606.ENSP00000294785,9606.ENSP00000326366	NCSTN,PSEN1
5	DOID:114	Heart disease	9	257	1.79	3.23e-12	9606.ENSP00000070846,9606.ENSP00000217381,9606.ENSP00000280772,9606.ENSP00000291295,9606.ENSP00000322460,9606.ENSP00000349467,9606.ENSP00000354923,9606.ENSP00000396915,9606.ENSP00000410257	PKP2,SNTA1,ANK3,CALM3,SCN4B,CALM1,DMD,SCN1B,SCN5A
5	DOID:0060036	Intrinsic cardiomyopathy	7	107	2.07	1.33e-10	9606.ENSP00000070846,9606.ENSP00000217381,9606.ENSP00000291295,9606.ENSP00000322460,9606.ENSP00000349467,9606.ENSP00000354923,9606.ENSP00000410257	PKP2,SNTA1,CALM3,SCN4B,CALM1,DMD,SCN5A
5	DOID:2843	Long qt syndrome	5	17	2.72	5.52e-10	9606.ENSP00000217381,9606.ENSP00000291295,9606.ENSP00000322460,9606.ENSP00000349467,9606.ENSP00000410257	SNTA1,CALM3,SCN4B,CALM1,SCN5A
5	DOID:10273	Heart conduction disease	5	56	2.2	8.23e-08	9606.ENSP00000291295,9606.ENSP00000322460,9606.ENSP00000349467,9606.ENSP00000396915,9606.ENSP00000410257	CALM3,SCN4B,CALM1,SCN1B,SCN5A
5	DOID:0050177	Monogenic disease	10	2778	0.81	2.02e-05	9606.ENSP00000070846,9606.ENSP00000217381,9606.ENSP00000280772,9606.ENSP00000282561,9606.ENSP00000291295,9606.ENSP00000322460,9606.ENSP00000349467,9606.ENSP00000354923,9606.ENSP00000396915,9606.ENSP00000410257	PKP2,SNTA1,ANK3,GJA1,CALM3,SCN4B,CALM1,DMD,SCN1B,SCN5A
5	DOID:0060674	Catecholaminergic polymorphic ventricular tachycardia	3	10	2.73	2.05e-05	9606.ENSP00000291295,9606.ENSP00000349467,9606.ENSP00000410257	CALM3,CALM1,SCN5A
5	DOID:0050650	Familial atrial fibrillation	3	20	2.43	0.0001	9606.ENSP00000322460,9606.ENSP00000396915,9606.ENSP00000410257	SCN4B,SCN1B,SCN5A
5	DOID:0050736	Autosomal dominant disease	7	1163	1.03	0.00026	9606.ENSP00000070846,9606.ENSP00000217381,9606.ENSP00000280772,9606.ENSP00000282561,9606.ENSP00000291295,9606.ENSP00000322460,9606.ENSP00000410257	PKP2,SNTA1,ANK3,GJA1,CALM3,SCN4B,SCN5A
5	DOID:0110650	Long qt syndrome 9	2	3	3.07	0.00096	9606.ENSP00000217381,9606.ENSP00000322460	SNTA1,SCN4B
5	DOID:0110651	Long qt syndrome 10	2	3	3.07	0.00096	9606.ENSP00000217381,9606.ENSP00000322460	SNTA1,SCN4B
5	DOID:0110652	Long qt syndrome 11	2	3	3.07	0.00096	9606.ENSP00000217381,9606.ENSP00000322460	SNTA1,SCN4B
5	DOID:7	Disease of anatomical entity	10	4452	0.6	0.00096	9606.ENSP00000070846,9606.ENSP00000217381,9606.ENSP00000280772,9606.ENSP00000282561,9606.ENSP00000291295,9606.ENSP00000322460,9606.ENSP00000349467,9606.ENSP00000354923,9606.ENSP00000396915,9606.ENSP00000410257	PKP2,SNTA1,ANK3,GJA1,CALM3,SCN4B,CALM1,DMD,SCN1B,SCN5A
5	DOID:0050739	Autosomal genetic disease	8	2323	0.79	0.0011	9606.ENSP00000070846,9606.ENSP00000217381,9606.ENSP00000280772,9606.ENSP00000282561,9606.ENSP00000291295,9606.ENSP00000322460,9606.ENSP00000354923,9606.ENSP00000410257	PKP2,SNTA1,ANK3,GJA1,CALM3,SCN4B,DMD,SCN5A
5	DOID:0110653	Long qt syndrome 12	2	4	2.95	0.0011	9606.ENSP00000217381,9606.ENSP00000322460	SNTA1,SCN4B
5	DOID:0111073	Progressive familial heart block	2	5	2.85	0.0014	9606.ENSP00000396915,9606.ENSP00000410257	SCN1B,SCN5A
5	DOID:0110646	Long qt syndrome 3	2	6	2.77	0.0018	9606.ENSP00000217381,9606.ENSP00000410257	SNTA1,SCN5A
5	DOID:0050451	Brugada syndrome	2	19	2.27	0.0119	9606.ENSP00000396915,9606.ENSP00000410257	SCN1B,SCN5A
6	N.A	N.A	N.A	N.A	N.A	N.A	N.A	N.A
7	DOID:0110130	Bardet-Biedl syndrome 8	7	9	3.14	4.06e-17	9606.ENSP00000242067,9606.ENSP00000245157,9606.ENSP00000264499,9606.ENSP00000268057,9606.ENSP00000295240,9606.ENSP00000317469,9606.ENSP00000482306	BBS9,BBS2,BBS7,BBS4,BBS5,BBS1,TTC8
7	DOID:1935	Bardet-Biedl syndrome	8	28	2.71	4.06e-17	9606.ENSP00000242067,9606.ENSP00000245157,9606.ENSP00000264499,9606.ENSP00000268057,9606.ENSP00000295240,9606.ENSP00000296135,9606.ENSP00000317469,9606.ENSP00000482306	BBS9,BBS2,BBS7,BBS4,BBS5,LZTFL1,BBS1,TTC8
7	DOID:9970	Obesity	8	65	2.34	5.99e-15	9606.ENSP00000242067,9606.ENSP00000245157,9606.ENSP00000264499,9606.ENSP00000268057,9606.ENSP00000295240,9606.ENSP00000296135,9606.ENSP00000317469,9606.ENSP00000482306	BBS9,BBS2,BBS7,BBS4,BBS5,LZTFL1,BBS1,TTC8
7	DOID:0110125	Bardet-Biedl syndrome 3	6	8	3.13	1.55e-14	9606.ENSP00000242067,9606.ENSP00000245157,9606.ENSP00000264499,9606.ENSP00000268057,9606.ENSP00000295240,9606.ENSP00000317469	BBS9,BBS2,BBS7,BBS4,BBS5,BBS1
7	DOID:0110128	Bardet-Biedl syndrome 6	6	9	3.07	2.15e-14	9606.ENSP00000242067,9606.ENSP00000245157,9606.ENSP00000264499,9606.ENSP00000268057,9606.ENSP00000295240,9606.ENSP00000317469	BBS9,BBS2,BBS7,BBS4,BBS5,BBS1
7	DOID:0110140	Bardet-Biedl syndrome 18	5	6	3.17	4.86e-12	9606.ENSP00000242067,9606.ENSP00000245157,9606.ENSP00000264499,9606.ENSP00000268057,9606.ENSP00000295240	BBS9,BBS2,BBS7,BBS4,BBS5
7	DOID:0110139	Bardet-Biedl syndrome 17	4	5	3.15	2.96e-09	9606.ENSP00000242067,9606.ENSP00000264499,9606.ENSP00000296135,9606.ENSP00000317469	BBS9,BBS7,LZTFL1,BBS1
7	DOID:1059	Intellectual disability	7	412	1.48	2.38e-07	9606.ENSP00000242067,9606.ENSP00000245157,9606.ENSP00000264499,9606.ENSP00000268057,9606.ENSP00000295240,9606.ENSP00000317469,9606.ENSP00000482306	BBS9,BBS2,BBS7,BBS4,BBS5,BBS1,TTC8
7	DOID:0110133	Bardet-Biedl syndrome 11	3	6	2.95	3.15e-06	9606.ENSP00000242067,9606.ENSP00000264499,9606.ENSP00000295240	BBS9,BBS7,BBS5
7	DOID:1148	Polydactyly	3	7	2.88	4.06e-06	9606.ENSP00000245157,9606.ENSP00000268057,9606.ENSP00000317469	BBS2,BBS4,BBS1
7	DOID:0110137	Bardet-Biedl syndrome 15	2	3	3.07	0.00063	9606.ENSP00000242067,9606.ENSP00000264499	BBS9,BBS7
7	DOID:0110135	Bardet-Biedl syndrome 13	2	4	2.95	0.00089	9606.ENSP00000295240,9606.ENSP00000317469	BBS5,BBS1
7	DOID:0110136	Bardet-Biedl syndrome 14	2	5	2.85	0.0011	9606.ENSP00000242067,9606.ENSP00000317469	BBS9,BBS1
8	N.A	N.A	N.A	N.A	N.A	N.A	N.A	N.A
9	DOID:2747	Glycogen storage disease	5	28	2.5	1.98e-08	9606.ENSP00000164139,9606.ENSP00000261195,9606.ENSP00000294724,9606.ENSP00000340736,9606.ENSP00000410833	PYGM,GYS2,AGL,GYG1,GBE1
9	DOID:3534	Lafora disease	2	3	3.07	0.0031	9606.ENSP00000238994,9606.ENSP00000345464	PPP1R3C,NHLRC1
9	DOID:0014667	Disease of metabolism	6	997	1.03	0.0058	9606.ENSP00000164139,9606.ENSP00000261195,9606.ENSP00000294724,9606.ENSP00000317904,9606.ENSP00000340736,9606.ENSP00000410833	PYGM,GYS2,AGL,GYS1,GYG1,GBE1
10	N.A	N.A	N.A	N.A	N.A	N.A	N.A	N.A
11	N.A	N.A	N.A	N.A	N.A	N.A	N.A	N.A
12	DOID:0050160	Inhalation anthrax	2	2	3.25	0.0075	9606.ENSP00000301945,9606.ENSP00000306185	ANTXR1,ANTXR2
12	DOID:13386	Gastrointestinal anthrax	2	2	3.25	0.0075	9606.ENSP00000301945,9606.ENSP00000306185	ANTXR1,ANTXR2
12	DOID:7426	Cutaneous anthrax	2	2	3.25	0.0075	9606.ENSP00000301945,9606.ENSP00000306185	ANTXR1,ANTXR2
12	DOID:62	Aortic valve disease	2	13	2.44	0.0262	9606.ENSP00000277541,9606.ENSP00000325527	NOTCH1,FBN1
13	N.A	N.A	N.A	N.A	N.A	N.A	N.A	N.A
14	N.A	N.A	N.A	N.A	N.A	N.A	N.A	N.A
15	N.A	N.A	N.A	N.A	N.A	N.A	N.A	N.A
16	DOID:12177	Common variable immunodeficiency	2	13	2.7	0.0358	9606.ENSP00000261652,9606.ENSP00000291232	TNFRSF13B,TNFRSF13C
17	N.A	N.A	N.A	N.A	N.A	N.A	N.A	N.A
18	DOID:0110159	Charcot-Marie-Tooth disease type 2B	2	3	3.42	0.0023	9606.ENSP00000265062,9606.ENSP00000479762	RAB7A,RAB7B
19	N.A	N.A	N.A	N.A	N.A	N.A	N.A	N.A
20	DOID:10286	Prostate carcinoma	2	10	3.29	0.0015	9606.ENSP00000363822,9606.ENSP00000381588	AR,TMPRSS2
21	N.A	N.A	N.A	N.A	N.A	N.A	N.A	N.A
22	N.A	N.A	N.A	N.A	N.A	N.A	N.A	N.A
23	N.A	N.A	N.A	N.A	N.A	N.A	N.A	N.A
24	N.A	N.A	N.A	N.A	N.A	N.A	N.A	N.A

## Sheet: T7 Tissue expression (TISSUES)
Network	#term ID	term description	observed gene count	background gene count	strength	false discovery rate	matching proteins in your network (IDs)	matching proteins in your network (labels)
1	BTO:0000089	Blood	44	1675	0.64	1.72e-14	9606.ENSP00000225831,9606.ENSP00000227752,9606.ENSP00000231449,9606.ENSP00000233242,9606.ENSP00000236850,9606.ENSP00000243077,9606.ENSP00000252486,9606.ENSP00000253727,9606.ENSP00000257570,9606.ENSP00000263341,9606.ENSP00000267082,9606.ENSP00000276927,9606.ENSP00000284981,9606.ENSP00000303634,9606.ENSP00000304592,9606.ENSP00000306512,9606.ENSP00000311032,9606.ENSP00000314151,9606.ENSP00000324890,…	CCL2,IL10RA,IL4,APOB,APOA1,LRP1,APOE,NR1H2,OASL,IL1B,ITGB7,IFNA1,APP,LRP8,FASN,CXCL8,CASP3,KLK3,CD28,OAS2,IFNAR2,IL17A,CTSB,ANXA2,FYN,FN1,ABCG1,ABCA1,AHNAK,TLR7,IL6ST,CXCL1,YWHAZ,ITGB2,IL6,MARK2,OAS1,TNF,MYD88,IL10,ITGB3,ELANE,IL12RB1,HAMP
1	BTO:0000570	Hematopoietic system	53	2543	0.54	1.72e-14	9606.ENSP00000215637,9606.ENSP00000225831,9606.ENSP00000227752,9606.ENSP00000231449,9606.ENSP00000233242,9606.ENSP00000236850,9606.ENSP00000243077,9606.ENSP00000252486,9606.ENSP00000253727,9606.ENSP00000257570,9606.ENSP00000263341,9606.ENSP00000264657,9606.ENSP00000267082,9606.ENSP00000276927,9606.ENSP00000284981,9606.ENSP00000303634,9606.ENSP00000304592,9606.ENSP00000306512,9606.ENSP00000311032,…	MADCAM1,CCL2,IL10RA,IL4,APOB,APOA1,LRP1,APOE,NR1H2,OASL,IL1B,STAT3,ITGB7,IFNA1,APP,LRP8,FASN,CXCL8,CASP3,KLK3,A2M,CD28,OAS2,IFNAR2,IL17A,CTSB,ANXA2,FYN,FN1,SREBF1,ABCG1,RNASEL,IL6R,ABCA1,AHNAK,TLR7,IL6ST,CXCL1,YWHAZ,IRF7,ITGB2,IL6,MARK2,DYSF,OAS1,TNF,MYD88,IL10,CEPT1,ITGB3,ELANE,IL12RB1,HAMP
1	BTO:0001491	Viscus	71	5020	0.37	1.17e-12	9606.ENSP00000215637,9606.ENSP00000225831,9606.ENSP00000227471,9606.ENSP00000231449,9606.ENSP00000233242,9606.ENSP00000236850,9606.ENSP00000243077,9606.ENSP00000245414,9606.ENSP00000252486,9606.ENSP00000260197,9606.ENSP00000260645,9606.ENSP00000263341,9606.ENSP00000264657,9606.ENSP00000264690,9606.ENSP00000267082,9606.ENSP00000267257,9606.ENSP00000270139,9606.ENSP00000272286,9606.ENSP00000276927,…	MADCAM1,CCL2,UNC93B1,IL4,APOB,APOA1,LRP1,IRF1,APOE,SORL1,ABCG5,IL1B,STAT3,KLKB1,ITGB7,PXN,IFNAR1,ABCG8,IFNA1,APP,IL10RB,FASN,CXCL8,KLK3,STAT2,UBE2N,LPCAT4,TUBB3,A2M,HSPA5,GSK3B,KLK4,UBE2V1,MAPT,JAK1,CTSL,VAPA,CTSB,ANXA2,FN1,SREBF1,STAT1,RNASEL,IL6R,S100A10,IFIT1,IFIT3,ABCA1,AHNAK,ISG15,TLR7,IL6ST,YWHAZ,ITGB1,ITGA4,IRF7,ITGB2,IL6,DYSF,PLD3,OAS1,TNF,MYD88,IL10,RXRA,TYK2,ITGB3,LDLR,ELANE,IL12RB1,HAMP
1	BTO:0000574	Hematopoietic cell	31	933	0.74	2.55e-12	9606.ENSP00000225831,9606.ENSP00000231449,9606.ENSP00000233242,9606.ENSP00000236850,9606.ENSP00000252486,9606.ENSP00000257570,9606.ENSP00000263341,9606.ENSP00000267082,9606.ENSP00000276927,9606.ENSP00000284981,9606.ENSP00000304592,9606.ENSP00000306512,9606.ENSP00000311032,9606.ENSP00000314151,9606.ENSP00000324890,9606.ENSP00000343957,9606.ENSP00000344192,9606.ENSP00000346032,9606.ENSP00000346671,…	CCL2,IL4,APOB,APOA1,APOE,OASL,IL1B,ITGB7,IFNA1,APP,FASN,CXCL8,CASP3,KLK3,CD28,IFNAR2,IL17A,ANXA2,FYN,FN1,ABCG1,ABCA1,AHNAK,CXCL1,YWHAZ,ITGB2,IL6,OAS1,TNF,IL10,ELANE
1	BTO:0001044	Phagocyte	13	117	1.27	3.25e-10	9606.ENSP00000233242,9606.ENSP00000236850,9606.ENSP00000252486,9606.ENSP00000257570,9606.ENSP00000263341,9606.ENSP00000306512,9606.ENSP00000343957,9606.ENSP00000354995,9606.ENSP00000363868,9606.ENSP00000367263,9606.ENSP00000379110,9606.ENSP00000398698,9606.ENSP00000466090	APOB,APOA1,APOE,OASL,IL1B,CXCL8,IFNAR2,ABCG1,ABCA1,AHNAK,CXCL1,TNF,ELANE
1	BTO:0000345	Digestive gland	47	2645	0.47	3.58e-10	9606.ENSP00000225831,9606.ENSP00000233242,9606.ENSP00000236850,9606.ENSP00000243077,9606.ENSP00000245414,9606.ENSP00000252486,9606.ENSP00000260197,9606.ENSP00000260645,9606.ENSP00000264657,9606.ENSP00000264690,9606.ENSP00000267257,9606.ENSP00000270139,9606.ENSP00000272286,9606.ENSP00000284981,9606.ENSP00000304592,9606.ENSP00000306512,9606.ENSP00000315768,9606.ENSP00000323929,9606.ENSP00000324173,…	CCL2,APOB,APOA1,LRP1,IRF1,APOE,SORL1,ABCG5,STAT3,KLKB1,PXN,IFNAR1,ABCG8,APP,FASN,CXCL8,STAT2,A2M,HSPA5,GSK3B,UBE2V1,JAK1,CTSL,VAPA,CTSB,ANXA2,FN1,SREBF1,STAT1,S100A10,ABCA1,AHNAK,ISG15,IL6ST,YWHAZ,ITGB1,IFITM3,IL6,DYSF,PLD3,OAS1,TNF,MYD88,RXRA,LDLR,ELANE,HAMP
1	BTO:0000759	Liver	39	1882	0.54	6.12e-10	9606.ENSP00000233242,9606.ENSP00000236850,9606.ENSP00000243077,9606.ENSP00000252486,9606.ENSP00000260197,9606.ENSP00000260645,9606.ENSP00000264657,9606.ENSP00000264690,9606.ENSP00000270139,9606.ENSP00000272286,9606.ENSP00000284981,9606.ENSP00000304592,9606.ENSP00000315768,9606.ENSP00000323929,9606.ENSP00000324173,9606.ENSP00000324806,9606.ENSP00000343204,9606.ENSP00000345344,9606.ENSP00000345656,…	APOB,APOA1,LRP1,APOE,SORL1,ABCG5,STAT3,KLKB1,IFNAR1,ABCG8,APP,FASN,STAT2,A2M,HSPA5,GSK3B,JAK1,CTSL,VAPA,CTSB,ANXA2,FN1,SREBF1,STAT1,S100A10,ABCA1,AHNAK,ISG15,IL6ST,YWHAZ,ITGB1,IL6,DYSF,PLD3,OAS1,TNF,RXRA,ELANE,HAMP
1	BTO:0001489	Whole body	107	12619	0.15	3.77e-09	9606.ENSP00000215637,9606.ENSP00000215794,9606.ENSP00000225831,9606.ENSP00000227471,9606.ENSP00000227752,9606.ENSP00000231449,9606.ENSP00000233242,9606.ENSP00000236850,9606.ENSP00000243077,9606.ENSP00000245414,9606.ENSP00000252486,9606.ENSP00000253727,9606.ENSP00000257570,9606.ENSP00000260197,9606.ENSP00000260585,9606.ENSP00000260645,9606.ENSP00000262209,9606.ENSP00000263088,9606.ENSP00000263341,…	MADCAM1,USP18,CCL2,UNC93B1,IL10RA,IL4,APOB,APOA1,LRP1,IRF1,APOE,NR1H2,OASL,SORL1,EPT1,ABCG5,TRPA1,PLD2,IL1B,STAT3,KLKB1,ITGB7,PXN,IFNAR1,ABCG8,IFNA1,APP,IL10RB,S100B,VCAM1,LRP8,FASN,CXCL8,CASP3,KLK3,STAT2,UBE2N,LPCAT4,TUBB3,A2M,HSPA5,GSK3B,CD28,KLK4,SOCS3,MX2,SNCA,UBE2V1,MAPT,OAS2,IFI6,PLD1,JAK1,IFNAR2,IL17A,CTSL,VAPA,CTSB,ANXA2,FYN,FN1,SREBF1,RXRG,STAT1,ABCG1,RNASEL,IL6R,S100A10,IRAK1,IFIT1,IFIT…
1	BTO:0000751	Leukocyte	25	849	0.69	9.72e-09	9606.ENSP00000231449,9606.ENSP00000233242,9606.ENSP00000257570,9606.ENSP00000263341,9606.ENSP00000267082,9606.ENSP00000276927,9606.ENSP00000284981,9606.ENSP00000304592,9606.ENSP00000306512,9606.ENSP00000311032,9606.ENSP00000314151,9606.ENSP00000324890,9606.ENSP00000343957,9606.ENSP00000344192,9606.ENSP00000346032,9606.ENSP00000346671,9606.ENSP00000346839,9606.ENSP00000367263,9606.ENSP00000379110,…	IL4,APOB,OASL,IL1B,ITGB7,IFNA1,APP,FASN,CXCL8,CASP3,KLK3,CD28,IFNAR2,IL17A,ANXA2,FYN,FN1,AHNAK,CXCL1,YWHAZ,ITGB2,OAS1,TNF,IL10,ELANE
1	BTO:0003861	Inflammatory cell	6	7	2.16	1.22e-08	9606.ENSP00000225831,9606.ENSP00000263341,9606.ENSP00000306512,9606.ENSP00000385675,9606.ENSP00000398698,9606.ENSP00000412237	CCL2,IL1B,CXCL8,IL6,TNF,IL10
1	BTO:0000392	Plasma cell	12	137	1.17	1.52e-08	9606.ENSP00000233242,9606.ENSP00000243077,9606.ENSP00000264690,9606.ENSP00000284981,9606.ENSP00000294728,9606.ENSP00000323929,9606.ENSP00000345344,9606.ENSP00000346839,9606.ENSP00000370698,9606.ENSP00000379350,9606.ENSP00000380948,9606.ENSP00000452786	APOB,LRP1,KLKB1,APP,VCAM1,A2M,CTSL,FN1,IL6ST,ITGB1,ITGB2,ITGB3
1	BTO:0000522	Gland	73	6602	0.27	4.23e-08	9606.ENSP00000215637,9606.ENSP00000225831,9606.ENSP00000227471,9606.ENSP00000233242,9606.ENSP00000236850,9606.ENSP00000243077,9606.ENSP00000245414,9606.ENSP00000252486,9606.ENSP00000253727,9606.ENSP00000257570,9606.ENSP00000260197,9606.ENSP00000260645,9606.ENSP00000263341,9606.ENSP00000264657,9606.ENSP00000264690,9606.ENSP00000267257,9606.ENSP00000270139,9606.ENSP00000272286,9606.ENSP00000276927,…	MADCAM1,CCL2,UNC93B1,APOB,APOA1,LRP1,IRF1,APOE,NR1H2,OASL,SORL1,ABCG5,IL1B,STAT3,KLKB1,PXN,IFNAR1,ABCG8,IFNA1,APP,IL10RB,FASN,CXCL8,KLK3,STAT2,A2M,HSPA5,GSK3B,KLK4,UBE2V1,MAPT,JAK1,CTSL,VAPA,CTSB,ANXA2,FN1,SREBF1,STAT1,RNASEL,IL6R,S100A10,IFIT1,RXRB,ABCA1,AHNAK,ISG15,IFNB1,TLR7,IL6ST,CXCL1,YWHAZ,ITGB1,IRF9,ITGA4,IRF7,ITGB2,IFITM3,IL6,DYSF,PLD3,OAS1,TNF,MYD88,IL10,RXRA,CDK5,TYK2,TRAF6,ITGB3,LDLR,E…
1	BTO:0000878	Mononuclear cell	11	117	1.2	4.23e-08	9606.ENSP00000225831,9606.ENSP00000233242,9606.ENSP00000257570,9606.ENSP00000263341,9606.ENSP00000306512,9606.ENSP00000343957,9606.ENSP00000367263,9606.ENSP00000379110,9606.ENSP00000385675,9606.ENSP00000398698,9606.ENSP00000412237	CCL2,APOB,OASL,IL1B,CXCL8,IFNAR2,AHNAK,CXCL1,IL6,TNF,IL10
1	BTO:0000449	Fetus	28	1229	0.58	1.13e-07	9606.ENSP00000243077,9606.ENSP00000245414,9606.ENSP00000253727,9606.ENSP00000264657,9606.ENSP00000267257,9606.ENSP00000294728,9606.ENSP00000303634,9606.ENSP00000306512,9606.ENSP00000323929,9606.ENSP00000324806,9606.ENSP00000330341,9606.ENSP00000342513,9606.ENSP00000345344,9606.ENSP00000345672,9606.ENSP00000346032,9606.ENSP00000346671,9606.ENSP00000346839,9606.ENSP00000348069,9606.ENSP00000354394,…	LRP1,IRF1,NR1H2,STAT3,PXN,VCAM1,LRP8,CXCL8,A2M,GSK3B,SOCS3,IFI6,CTSL,CTSB,ANXA2,FYN,FN1,SREBF1,STAT1,IRAK1,AHNAK,TLR7,IL6ST,YWHAZ,ITGB1,IL6,DYSF,ITGB3
1	BTO:0001078	Placenta	26	1176	0.57	8.28e-07	9606.ENSP00000243077,9606.ENSP00000245414,9606.ENSP00000253727,9606.ENSP00000264657,9606.ENSP00000267257,9606.ENSP00000294728,9606.ENSP00000303634,9606.ENSP00000323929,9606.ENSP00000324806,9606.ENSP00000330341,9606.ENSP00000342513,9606.ENSP00000345344,9606.ENSP00000345672,9606.ENSP00000346032,9606.ENSP00000346671,9606.ENSP00000346839,9606.ENSP00000348069,9606.ENSP00000354394,9606.ENSP00000358997,…	LRP1,IRF1,NR1H2,STAT3,PXN,VCAM1,LRP8,A2M,GSK3B,SOCS3,IFI6,CTSL,CTSB,ANXA2,FYN,FN1,SREBF1,STAT1,IRAK1,AHNAK,TLR7,IL6ST,YWHAZ,ITGB1,DYSF,ITGB3
1	BTO:0003099	Internal female genital organ	40	2593	0.41	8.28e-07	9606.ENSP00000243077,9606.ENSP00000245414,9606.ENSP00000253727,9606.ENSP00000263088,9606.ENSP00000264657,9606.ENSP00000267257,9606.ENSP00000270139,9606.ENSP00000294728,9606.ENSP00000303634,9606.ENSP00000316176,9606.ENSP00000323929,9606.ENSP00000324806,9606.ENSP00000330341,9606.ENSP00000338345,9606.ENSP00000342278,9606.ENSP00000342513,9606.ENSP00000345344,9606.ENSP00000345672,9606.ENSP00000346032,…	LRP1,IRF1,NR1H2,PLD2,STAT3,PXN,IFNAR1,VCAM1,LRP8,UBE2N,A2M,GSK3B,SOCS3,SNCA,OAS2,IFI6,CTSL,CTSB,ANXA2,FYN,FN1,SREBF1,STAT1,IRAK1,AHNAK,IFNB1,TLR7,IL6ST,CXCL1,YWHAZ,ITGB1,IRF9,IRF7,MX1,IFITM3,DYSF,PLD3,OAS1,RXRA,ITGB3
1	BTO:0000284	Organism form	36	2239	0.43	2.1e-06	9606.ENSP00000227752,9606.ENSP00000243077,9606.ENSP00000245414,9606.ENSP00000253727,9606.ENSP00000264657,9606.ENSP00000267257,9606.ENSP00000284981,9606.ENSP00000294728,9606.ENSP00000303634,9606.ENSP00000304592,9606.ENSP00000306512,9606.ENSP00000311032,9606.ENSP00000316176,9606.ENSP00000323929,9606.ENSP00000324806,9606.ENSP00000330341,9606.ENSP00000342513,9606.ENSP00000345344,9606.ENSP00000345672,…	IL10RA,LRP1,IRF1,NR1H2,STAT3,PXN,APP,VCAM1,LRP8,FASN,CXCL8,CASP3,UBE2N,A2M,GSK3B,SOCS3,IFI6,CTSL,CTSB,ANXA2,FYN,FN1,SREBF1,STAT1,IRAK1,AHNAK,TLR7,IL6ST,YWHAZ,ITGB1,IRF7,IL6,DYSF,TNF,IL10,ITGB3
1	BTO:0000583	Bone marrow cancer cell	15	395	0.8	2.14e-06	9606.ENSP00000264657,9606.ENSP00000267257,9606.ENSP00000270139,9606.ENSP00000311032,9606.ENSP00000315768,9606.ENSP00000324806,9606.ENSP00000343957,9606.ENSP00000346671,9606.ENSP00000354394,9606.ENSP00000369554,9606.ENSP00000370698,9606.ENSP00000379287,9606.ENSP00000401399,9606.ENSP00000419782,9606.ENSP00000452786	STAT3,PXN,IFNAR1,CASP3,STAT2,GSK3B,IFNAR2,FYN,STAT1,IFNA2,IL6ST,YWHAZ,MYD88,CDK5,ITGB3
1	BTO:0001488	Endocrine gland	65	6036	0.26	2.84e-06	9606.ENSP00000215637,9606.ENSP00000225831,9606.ENSP00000233242,9606.ENSP00000236850,9606.ENSP00000243077,9606.ENSP00000245414,9606.ENSP00000252486,9606.ENSP00000253727,9606.ENSP00000257570,9606.ENSP00000260197,9606.ENSP00000260645,9606.ENSP00000264657,9606.ENSP00000264690,9606.ENSP00000267257,9606.ENSP00000270139,9606.ENSP00000272286,9606.ENSP00000276927,9606.ENSP00000284981,9606.ENSP00000304592,…	MADCAM1,CCL2,APOB,APOA1,LRP1,IRF1,APOE,NR1H2,OASL,SORL1,ABCG5,STAT3,KLKB1,PXN,IFNAR1,ABCG8,IFNA1,APP,FASN,CXCL8,KLK3,STAT2,A2M,HSPA5,GSK3B,UBE2V1,MAPT,JAK1,CTSL,VAPA,CTSB,ANXA2,FN1,SREBF1,STAT1,S100A10,IFIT1,RXRB,ABCA1,AHNAK,ISG15,IFNB1,TLR7,IL6ST,CXCL1,YWHAZ,ITGB1,IRF9,ITGA4,IRF7,ITGB2,IFITM3,IL6,DYSF,PLD3,OAS1,TNF,MYD88,IL10,RXRA,CDK5,TRAF6,LDLR,ELANE,HAMP
1	BTO:0000580	Blood cancer cell	24	1098	0.56	3.31e-06	9606.ENSP00000227752,9606.ENSP00000263341,9606.ENSP00000264657,9606.ENSP00000267257,9606.ENSP00000270139,9606.ENSP00000304592,9606.ENSP00000306512,9606.ENSP00000311032,9606.ENSP00000315768,9606.ENSP00000324806,9606.ENSP00000324890,9606.ENSP00000329418,9606.ENSP00000330341,9606.ENSP00000340820,9606.ENSP00000346671,9606.ENSP00000354394,9606.ENSP00000358997,9606.ENSP00000379287,9606.ENSP00000379350,…	IL10RA,IL1B,STAT3,PXN,IFNAR1,FASN,CXCL8,CASP3,STAT2,GSK3B,CD28,SOCS1,SOCS3,MAPT,FYN,STAT1,IRAK1,YWHAZ,ITGB1,ITGA4,ITGB2,MYD88,CDK5,ITGB3
1	BTO:0000421	Connective tissue	21	871	0.61	5.23e-06	9606.ENSP00000231449,9606.ENSP00000236850,9606.ENSP00000263341,9606.ENSP00000284981,9606.ENSP00000304592,9606.ENSP00000316176,9606.ENSP00000320295,9606.ENSP00000324173,9606.ENSP00000324890,9606.ENSP00000340305,9606.ENSP00000342793,9606.ENSP00000344192,9606.ENSP00000345672,9606.ENSP00000346032,9606.ENSP00000346839,9606.ENSP00000360869,9606.ENSP00000370698,9606.ENSP00000379287,9606.ENSP00000380948,…	IL4,APOA1,IL1B,APP,FASN,UBE2N,TUBB3,HSPA5,CD28,UBE2V1,PLD1,IL17A,CTSB,ANXA2,FN1,IFIT1,IL6ST,YWHAZ,ITGB2,IL6,TNF
1	BTO:0001034	Peritoneal macrophage	4	4	2.22	6.75e-06	9606.ENSP00000263341,9606.ENSP00000385675,9606.ENSP00000398698,9606.ENSP00000412237	IL1B,IL6,TNF,IL10
1	BTO:0001370	THP-1 cell	4	4	2.22	6.75e-06	9606.ENSP00000263341,9606.ENSP00000306512,9606.ENSP00000385675,9606.ENSP00000398698	IL1B,CXCL8,IL6,TNF
1	BTO:0003872	Foam cell	4	4	2.22	6.75e-06	9606.ENSP00000236850,9606.ENSP00000252486,9606.ENSP00000354995,9606.ENSP00000363868	APOA1,APOE,ABCG1,ABCA1
1	BTO:0005810	Immune system	28	1553	0.48	8.78e-06	9606.ENSP00000215637,9606.ENSP00000231449,9606.ENSP00000263341,9606.ENSP00000264657,9606.ENSP00000267082,9606.ENSP00000276927,9606.ENSP00000284981,9606.ENSP00000304592,9606.ENSP00000311032,9606.ENSP00000314151,9606.ENSP00000323929,9606.ENSP00000324890,9606.ENSP00000344192,9606.ENSP00000346032,9606.ENSP00000346671,9606.ENSP00000346839,9606.ENSP00000348069,9606.ENSP00000367263,9606.ENSP00000370034,…	MADCAM1,IL4,IL1B,STAT3,ITGB7,IFNA1,APP,FASN,CASP3,KLK3,A2M,CD28,IL17A,ANXA2,FYN,FN1,SREBF1,AHNAK,TLR7,YWHAZ,IRF7,ITGB2,IL6,DYSF,OAS1,TNF,MYD88,IL10
1	BTO:0000936	Neurofibrillary tangle	4	5	2.13	1.03e-05	9606.ENSP00000252486,9606.ENSP00000284981,9606.ENSP00000338345,9606.ENSP00000340820	APOE,APP,SNCA,MAPT
1	BTO:0000174	Embryonic structure	33	2132	0.41	1.57e-05	9606.ENSP00000243077,9606.ENSP00000245414,9606.ENSP00000253727,9606.ENSP00000264657,9606.ENSP00000267257,9606.ENSP00000294728,9606.ENSP00000303634,9606.ENSP00000304592,9606.ENSP00000306512,9606.ENSP00000311032,9606.ENSP00000316176,9606.ENSP00000323929,9606.ENSP00000324806,9606.ENSP00000330341,9606.ENSP00000342513,9606.ENSP00000345344,9606.ENSP00000345672,9606.ENSP00000346032,9606.ENSP00000346671,…	LRP1,IRF1,NR1H2,STAT3,PXN,VCAM1,LRP8,FASN,CXCL8,CASP3,UBE2N,A2M,GSK3B,SOCS3,IFI6,CTSL,CTSB,ANXA2,FYN,FN1,SREBF1,STAT1,IRAK1,AHNAK,TLR7,IL6ST,YWHAZ,ITGB1,IRF7,IL6,DYSF,IL10,ITGB3
1	BTO:0003120	Atherosclerotic plaque	4	6	2.05	1.59e-05	9606.ENSP00000233242,9606.ENSP00000252486,9606.ENSP00000354995,9606.ENSP00000363868	APOB,APOE,ABCG1,ABCA1
1	BTO:0000078	Microglia	4	7	1.98	2.4e-05	9606.ENSP00000263341,9606.ENSP00000284981,9606.ENSP00000385675,9606.ENSP00000398698	IL1B,APP,IL6,TNF
1	BTO:0000058	Alimentary canal	30	1865	0.43	2.59e-05	9606.ENSP00000215637,9606.ENSP00000233242,9606.ENSP00000236850,9606.ENSP00000264690,9606.ENSP00000267082,9606.ENSP00000284981,9606.ENSP00000304592,9606.ENSP00000306512,9606.ENSP00000316176,9606.ENSP00000317300,9606.ENSP00000320295,9606.ENSP00000323929,9606.ENSP00000324173,9606.ENSP00000340305,9606.ENSP00000345344,9606.ENSP00000345672,9606.ENSP00000346032,9606.ENSP00000346839,9606.ENSP00000360869,…	MADCAM1,APOB,APOA1,KLKB1,ITGB7,APP,FASN,CXCL8,UBE2N,LPCAT4,TUBB3,A2M,HSPA5,UBE2V1,CTSL,CTSB,ANXA2,FN1,IFIT1,AHNAK,ISG15,YWHAZ,ITGB1,IRF7,PLD3,OAS1,TNF,IL10,IL12RB1,HAMP
1	BTO:0001441	Marrow cell	8	108	1.09	2.63e-05	9606.ENSP00000233242,9606.ENSP00000257570,9606.ENSP00000263341,9606.ENSP00000306512,9606.ENSP00000343957,9606.ENSP00000367263,9606.ENSP00000379110,9606.ENSP00000398698	APOB,OASL,IL1B,CXCL8,IFNAR2,AHNAK,CXCL1,TNF
1	BTO:0003091	Urogenital system	66	6716	0.22	4.95e-05	9606.ENSP00000215794,9606.ENSP00000225831,9606.ENSP00000227471,9606.ENSP00000236850,9606.ENSP00000243077,9606.ENSP00000245414,9606.ENSP00000252486,9606.ENSP00000253727,9606.ENSP00000257570,9606.ENSP00000263088,9606.ENSP00000263341,9606.ENSP00000264657,9606.ENSP00000267257,9606.ENSP00000270139,9606.ENSP00000284981,9606.ENSP00000290200,9606.ENSP00000294728,9606.ENSP00000303634,9606.ENSP00000304592,…	USP18,CCL2,UNC93B1,APOA1,LRP1,IRF1,APOE,NR1H2,OASL,PLD2,IL1B,STAT3,PXN,IFNAR1,APP,IL10RB,VCAM1,LRP8,FASN,CXCL8,CASP3,KLK3,UBE2N,A2M,HSPA5,GSK3B,KLK4,SOCS3,SNCA,UBE2V1,OAS2,IFI6,PLD1,CTSL,VAPA,CTSB,ANXA2,FYN,FN1,SREBF1,STAT1,RNASEL,IL6R,IRAK1,IFIT1,IFIT3,AHNAK,ISG15,IFNB1,TLR7,IL6ST,CXCL1,YWHAZ,ITGB1,IRF9,ITGA4,IRF7,MX1,IFITM3,DYSF,PLD3,OAS1,RXRA,TYK2,ITGB3,LDLR
1	BTO:0001271	Leukemia cell	20	949	0.55	5.33e-05	9606.ENSP00000264657,9606.ENSP00000267257,9606.ENSP00000270139,9606.ENSP00000304592,9606.ENSP00000306512,9606.ENSP00000311032,9606.ENSP00000315768,9606.ENSP00000324806,9606.ENSP00000324890,9606.ENSP00000329418,9606.ENSP00000340820,9606.ENSP00000346671,9606.ENSP00000354394,9606.ENSP00000358997,9606.ENSP00000379287,9606.ENSP00000379350,9606.ENSP00000380227,9606.ENSP00000380948,9606.ENSP00000401399,…	STAT3,PXN,IFNAR1,FASN,CXCL8,CASP3,STAT2,GSK3B,CD28,SOCS1,MAPT,FYN,STAT1,IRAK1,YWHAZ,ITGB1,ITGA4,ITGB2,MYD88,ITGB3
1	BTO:0001823	Synovium	7	82	1.15	5.33e-05	9606.ENSP00000263341,9606.ENSP00000324890,9606.ENSP00000360869,9606.ENSP00000370698,9606.ENSP00000380948,9606.ENSP00000385675,9606.ENSP00000398698	IL1B,CD28,IFIT1,IL6ST,ITGB2,IL6,TNF
1	BTO:0000042	Animal	109	14895	0.09	5.71e-05	9606.ENSP00000215637,9606.ENSP00000215794,9606.ENSP00000225831,9606.ENSP00000227471,9606.ENSP00000227752,9606.ENSP00000231449,9606.ENSP00000233242,9606.ENSP00000236850,9606.ENSP00000243077,9606.ENSP00000245414,9606.ENSP00000252486,9606.ENSP00000253727,9606.ENSP00000257570,9606.ENSP00000260197,9606.ENSP00000260585,9606.ENSP00000260645,9606.ENSP00000262209,9606.ENSP00000263088,9606.ENSP00000263341,…	MADCAM1,USP18,CCL2,UNC93B1,IL10RA,IL4,APOB,APOA1,LRP1,IRF1,APOE,NR1H2,OASL,SORL1,EPT1,ABCG5,TRPA1,PLD2,IL1B,STAT3,KLKB1,ITGB7,PXN,IFNAR1,ABCG8,IFNA1,APP,IL10RB,S100B,VCAM1,LRP8,FASN,CXCL8,ISG20,CASP3,KLK3,STAT2,UBE2N,LPCAT4,TUBB3,A2M,HSPA5,GSK3B,CD28,KLK4,SOCS1,SOCS3,MX2,SNCA,UBE2V1,MAPT,OAS2,IFI6,PLD1,JAK1,IFNAR2,IL17A,CTSL,VAPA,CTSB,ANXA2,FYN,FN1,SREBF1,RXRG,STAT1,ABCG1,RNASEL,IL6R,S100A10,IRAK…
1	BTO:0000203	Respiratory system	25	1436	0.46	5.79e-05	9606.ENSP00000252486,9606.ENSP00000262209,9606.ENSP00000263341,9606.ENSP00000264657,9606.ENSP00000270139,9606.ENSP00000284981,9606.ENSP00000306512,9606.ENSP00000315768,9606.ENSP00000316176,9606.ENSP00000323929,9606.ENSP00000324890,9606.ENSP00000340305,9606.ENSP00000342278,9606.ENSP00000345656,9606.ENSP00000345672,9606.ENSP00000346032,9606.ENSP00000346839,9606.ENSP00000357470,9606.ENSP00000367263,…	APOE,TRPA1,IL1B,STAT3,IFNAR1,APP,CXCL8,STAT2,UBE2N,A2M,CD28,UBE2V1,OAS2,VAPA,CTSB,ANXA2,FN1,IL6R,AHNAK,ITGB1,IL6,PLD3,TRAF6,LDLR,ELANE
1	BTO:0000648	Intestine	23	1249	0.49	6.46e-05	9606.ENSP00000215637,9606.ENSP00000233242,9606.ENSP00000264690,9606.ENSP00000267082,9606.ENSP00000284981,9606.ENSP00000306512,9606.ENSP00000317300,9606.ENSP00000323929,9606.ENSP00000340305,9606.ENSP00000345344,9606.ENSP00000345672,9606.ENSP00000346032,9606.ENSP00000346839,9606.ENSP00000360869,9606.ENSP00000367263,9606.ENSP00000368699,9606.ENSP00000379287,9606.ENSP00000380697,9606.ENSP00000387050,…	MADCAM1,APOB,KLKB1,ITGB7,APP,CXCL8,LPCAT4,A2M,UBE2V1,CTSL,CTSB,ANXA2,FN1,IFIT1,AHNAK,ISG15,YWHAZ,IRF7,PLD3,OAS1,TNF,IL12RB1,HAMP
1	BTO:0001486	Skeletal system	22	1203	0.49	0.00012	9606.ENSP00000233242,9606.ENSP00000236850,9606.ENSP00000243077,9606.ENSP00000252486,9606.ENSP00000264690,9606.ENSP00000284981,9606.ENSP00000294728,9606.ENSP00000323929,9606.ENSP00000324173,9606.ENSP00000330341,9606.ENSP00000342793,9606.ENSP00000345344,9606.ENSP00000345672,9606.ENSP00000346032,9606.ENSP00000346839,9606.ENSP00000370698,9606.ENSP00000371532,9606.ENSP00000379287,9606.ENSP00000379350,…	APOB,APOA1,LRP1,APOE,KLKB1,APP,VCAM1,A2M,HSPA5,SOCS3,PLD1,CTSL,CTSB,ANXA2,FN1,IL6ST,VLDLR,YWHAZ,ITGB1,ITGB2,DYSF,ITGB3
1	BTO:0000634	Integument	29	1970	0.39	0.00017	9606.ENSP00000215637,9606.ENSP00000243077,9606.ENSP00000252486,9606.ENSP00000253727,9606.ENSP00000263088,9606.ENSP00000263341,9606.ENSP00000291700,9606.ENSP00000294728,9606.ENSP00000304592,9606.ENSP00000306512,9606.ENSP00000314151,9606.ENSP00000323929,9606.ENSP00000342513,9606.ENSP00000345344,9606.ENSP00000345672,9606.ENSP00000346032,9606.ENSP00000346839,9606.ENSP00000357801,9606.ENSP00000360869,…	MADCAM1,LRP1,APOE,NR1H2,PLD2,IL1B,S100B,VCAM1,FASN,CXCL8,KLK3,A2M,IFI6,CTSL,CTSB,ANXA2,FN1,S100A10,IFIT1,ABCA1,CXCL1,YWHAZ,ITGB1,ITGA4,IFITM3,TNF,IL10,ITGB3,HAMP
[truncated: 174 more rows]
